# Supplementary material for: Adiposity, metabolomic biomarkers, and risk of nonalcoholic fatty liver disease: a case-cohort study
Source: PubMed Central journal article supplement (PMC8895224; doi:10.1093/ajcn/nqab392), 2021-12-13
Supplement: nqab392_supplemental_file.pdf [file nqab392_supplemental_file.pdf]

## On-line Supplementary Materials

# Adiposity, metabolomic biomarkers and risk of non-alcoholic fatty liver disease: a case-cohort study

## American Journal of Clinical Nutrition

Yuanjie Pang, DPhil<sup>1</sup>, Christiana Kartsonaki, DPhil<sup>2,3</sup>, Jun Lv, PhD<sup>1,4</sup>, Iona Y. Millwood, DPhil<sup>2,3</sup>, Zammy Fairhurst-Hunter, DPhil<sup>2</sup>, Iain Turnbull, MRCP<sup>2</sup>, Fiona Bragg, DPhil<sup>2,3</sup>, Michael R. Hill, DPhil<sup>2</sup>, Canqing Yu, PhD<sup>1,4</sup>, Yu Guo, MSc<sup>5</sup>, Yiping Chen, DPhil<sup>2,3</sup>, Ling Yang, PhD<sup>2,3</sup>, Robert Clarke, FRCP, MD<sup>2</sup>, Robin G. Walters, PhD<sup>2,3</sup>, Ming Wu, PhD<sup>6</sup>, Junshi Chen, MD<sup>7</sup>, Liming Li, MD<sup>1,4\*</sup>, Zhengming Chen, DPhil<sup>2,3\*</sup>, Michael V. Holmes, PhD<sup>2,3,8\*</sup>

\* Joint senior authors

1. Department of Epidemiology and Biostatistics, School of Public Health, Peking University, 38 Xueyuan Road, Beijing 100191, China
2. Clinical Trial Service Unit & Epidemiological Studies Unit (CTSU), Nuffield Department of Population Health, Big Data Institute Building, Roosevelt Drive, University of Oxford, UK
3. Medical Research Council Population Health Research Unit (MRC PHRU) at the University of Oxford, Nuffield Department of Population Health, University of Oxford, UK
4. Peking University Center for Public Health and Epidemic Preparedness & Response (PKU-PHEPR), Peking University, 38 Xueyuan Road, Beijing 100191, China
5. Chinese Academy of Medical Sciences, 9 Dongdan San Tiao, Beijing 100730, China
6. Jiangsu Center for Disease Control and Prevention, 172 Jiangsu Road, Nanjing 210009, China
7. National Center for Food Safety Risk Assessment, 37 Guangqu Road, Beijing 100021, China
8. National Institute for Health Research Oxford Biomedical Research Centre, Oxford University Hospital, Old Road, Oxford OX3 7LE, UK

### Address for correspondence:

Dr Christiana Kartsonaki  
Medical Research Council  
Population Health Research Unit  
University of Oxford  
Big Data Institute  
Oxford, OX3 7LF, UK  
Tel: 44-1865-743644  
Fax: 44-1865-743985  
christiana.kartsonaki@ndph.ox.ac.uk

## Table of Content

|                                                                                                                                                        |     |
|--------------------------------------------------------------------------------------------------------------------------------------------------------|-----|
| Supplementary Figure 1. Histograms of log-transformed distribution of individual metabolites.....                                                      | 3   |
| Supplementary Figure 2. Sensitivity analyses comparing different MR analytic approaches .....                                                          | 15  |
| Supplementary Figure 3. Associations of BMI and WCadjBMI with metabolic biomarkers                                                                     | 16  |
| Supplementary Figure 4. Observational and genetic associations of BMI with selected metabolic biomarkers.....                                          | 17  |
| Supplementary Figure 5. Subgroup analyses of the observational associations of BMI with metabolomics and metabolomics with NAFLD.....                  | 18  |
| Supplementary Figure 6. Observational associations of BMI with metabolomics and metabolomics with NAFLD, with additional adjustment.....               | 19  |
| Supplementary Figure 7. Associations of BMI, metabolomics, and NAFLD risk in CKB for selected metabolic biomarkers identified by previous studies..... | 20  |
| Supplementary Figure 8. Associations of BMI, metabolomics, and NAFLD risk in CKB for selected metabolic biomarkers identified by previous studies..... | 21  |
| Supplementary Table 1. Information of 1208 metabolic biomarkers measured by Metabolon .....                                                            | 22  |
| Supplementary Table 2. Genetic variants associated with BMI in the GIANT consortium.                                                                   | 63  |
| Supplementary Table 3. Associations of potential confounders with BMI GRS.....                                                                         | 84  |
| Supplementary Table 4. Observational associations of adiposity with metabolic biomarkers .....                                                         | 85  |
| Supplementary Table 5. Observational associations of metabolic biomarkers with NAFLD .....                                                             | 121 |
| Supplementary Table 6. Genetic associations of BMI with metabolic biomarkers.....                                                                      | 157 |
| Supplementary Table 7. Multivariable analyses of the associations between metabolic biomarkers with risk of NAFLD.....                                 | 166 |
| Supplementary Table 8. Previous studies on metabolic biomarkers with NAFLD.....                                                                        | 167 |
| Supplementary Table 9. Previous prospective studies on metabolic risk factors with NAFLD .....                                                         | 169 |















# Supplementary Figure 1. continued

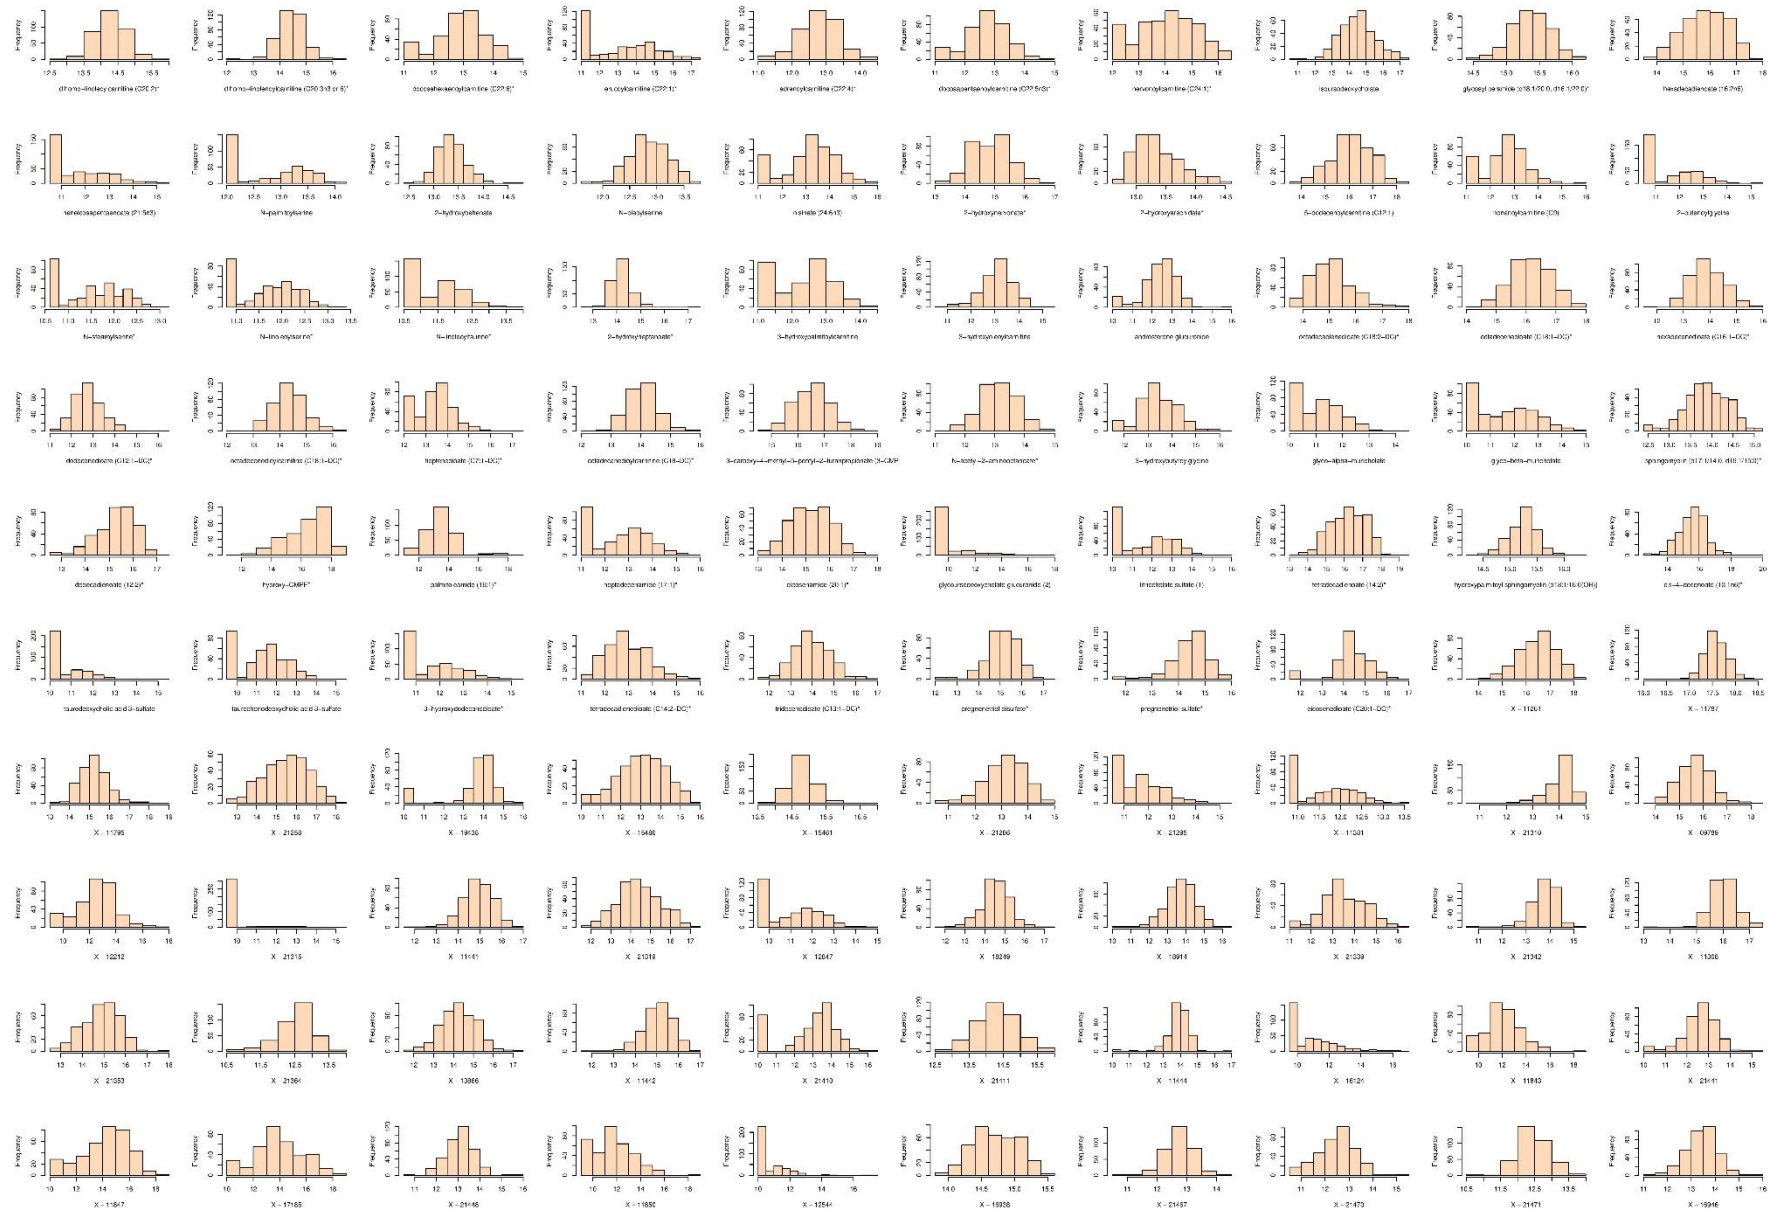



# Supplementary Figure 1. continued

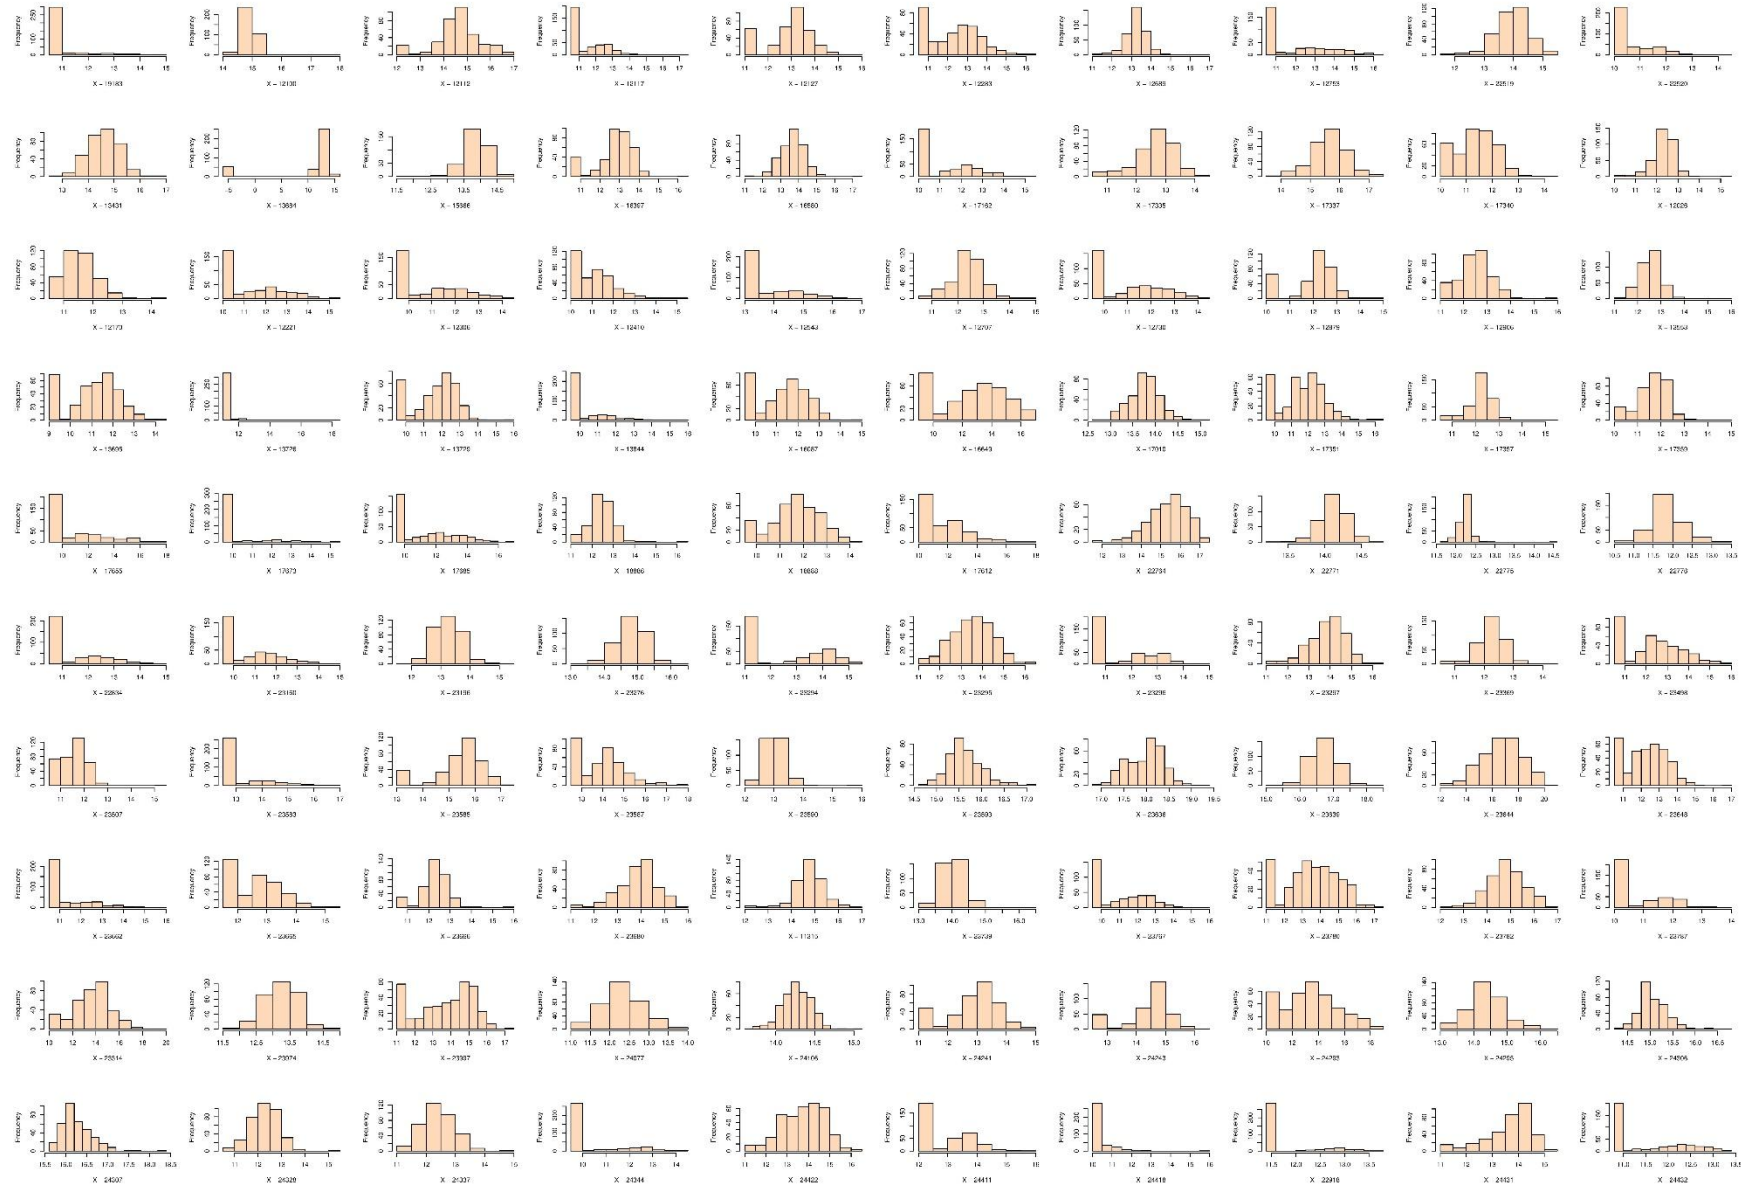

# Supplementary Figure 1. continued

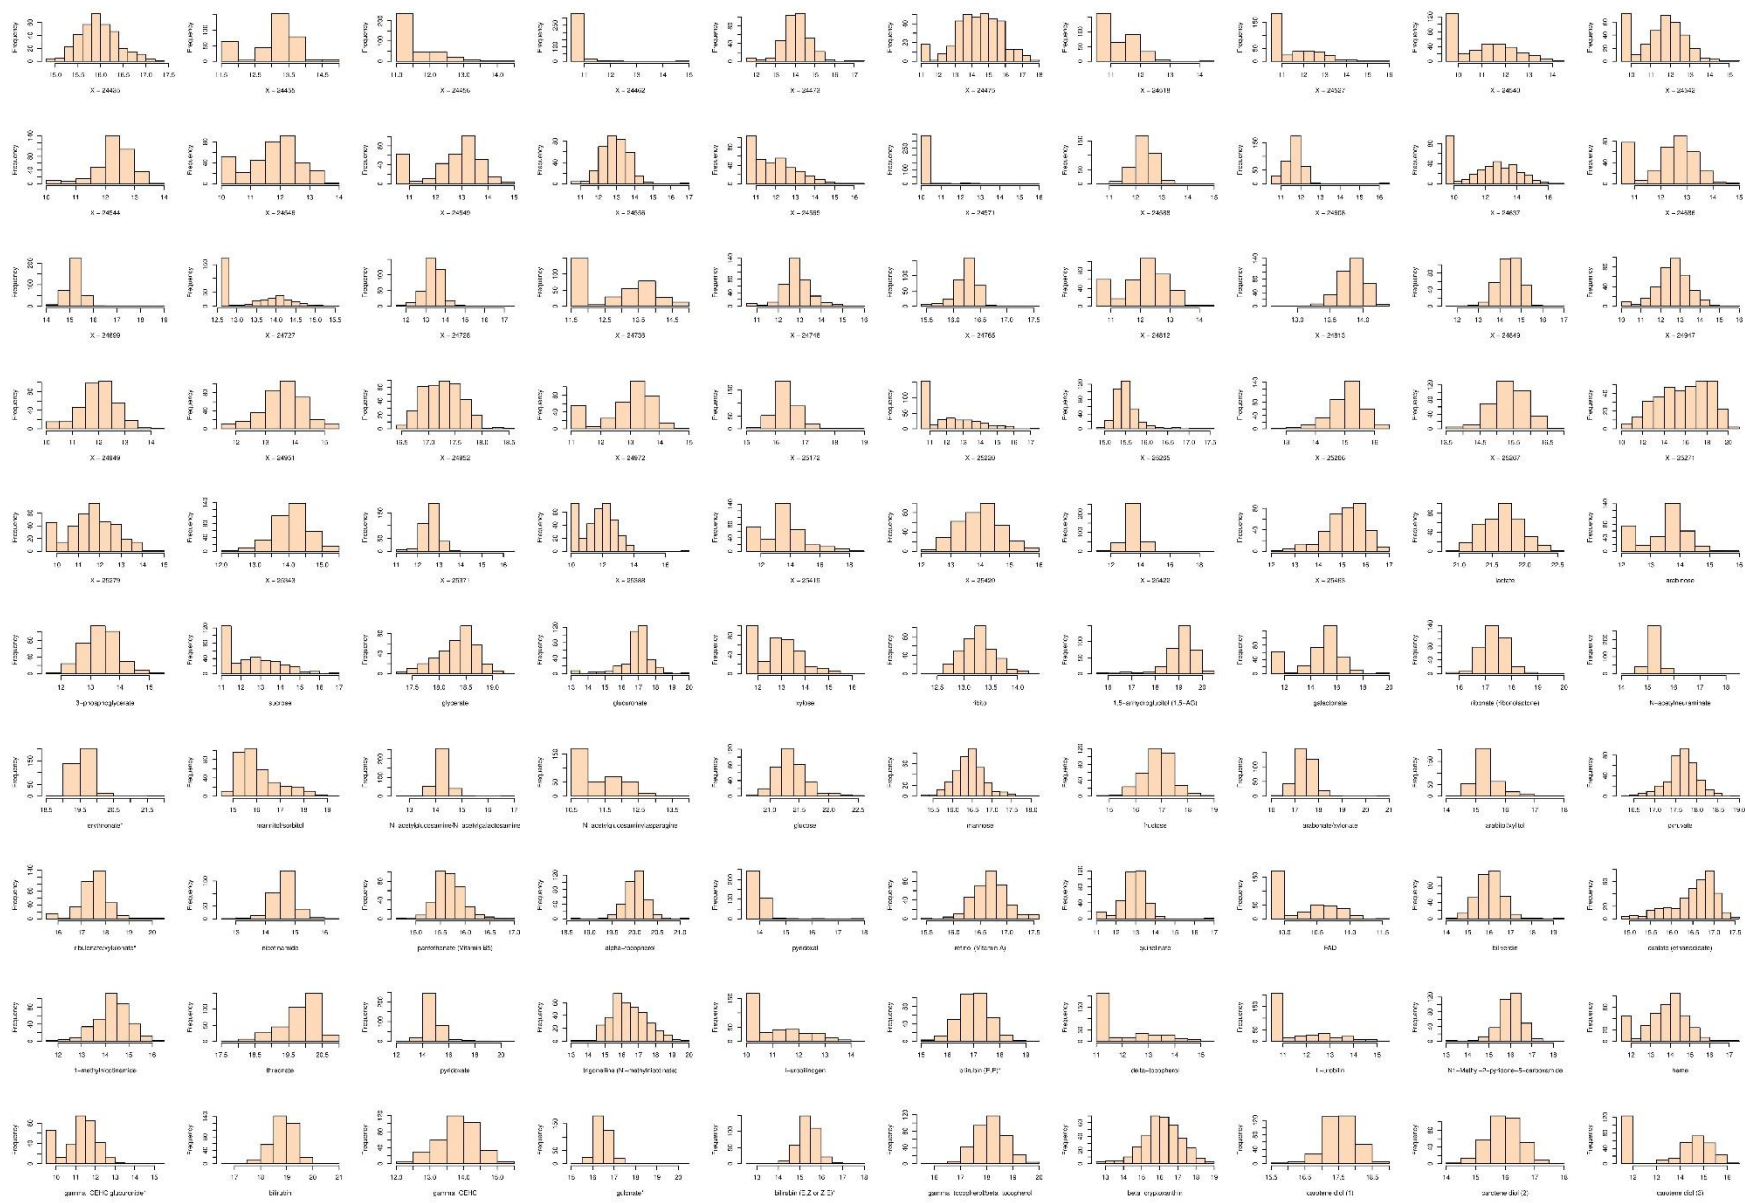



# Supplementary Figure 1. continued

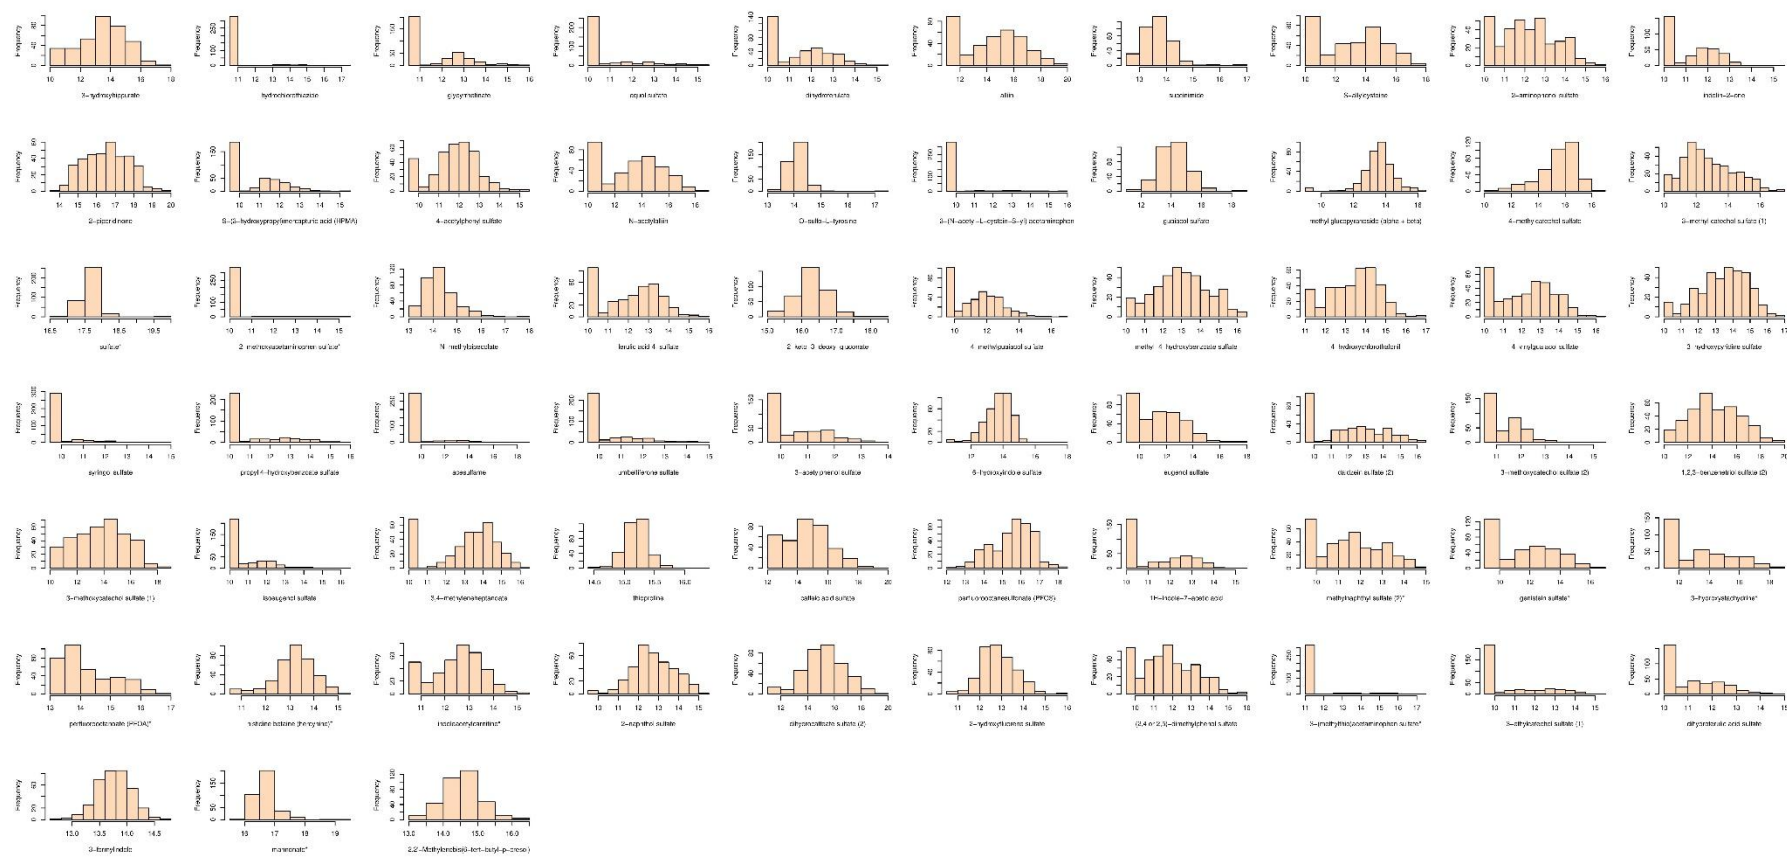

## Supplementary Figure 2. Sensitivity analyses comparing different MR analytic approaches

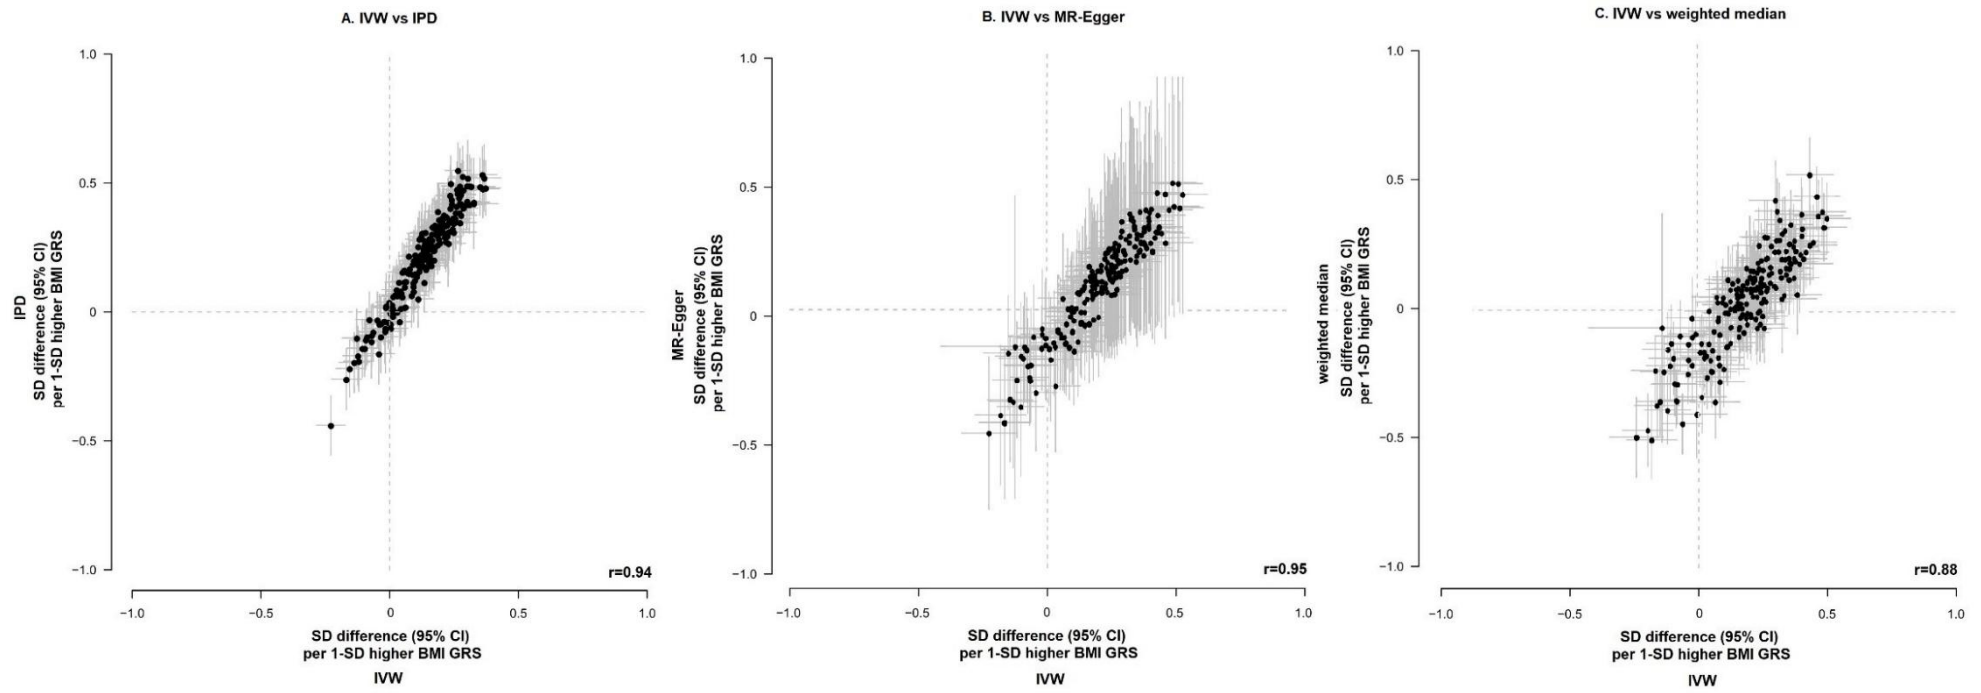

Supplementary Figure 3. Associations of BMI and WCadjBMI with metabolic biomarkers

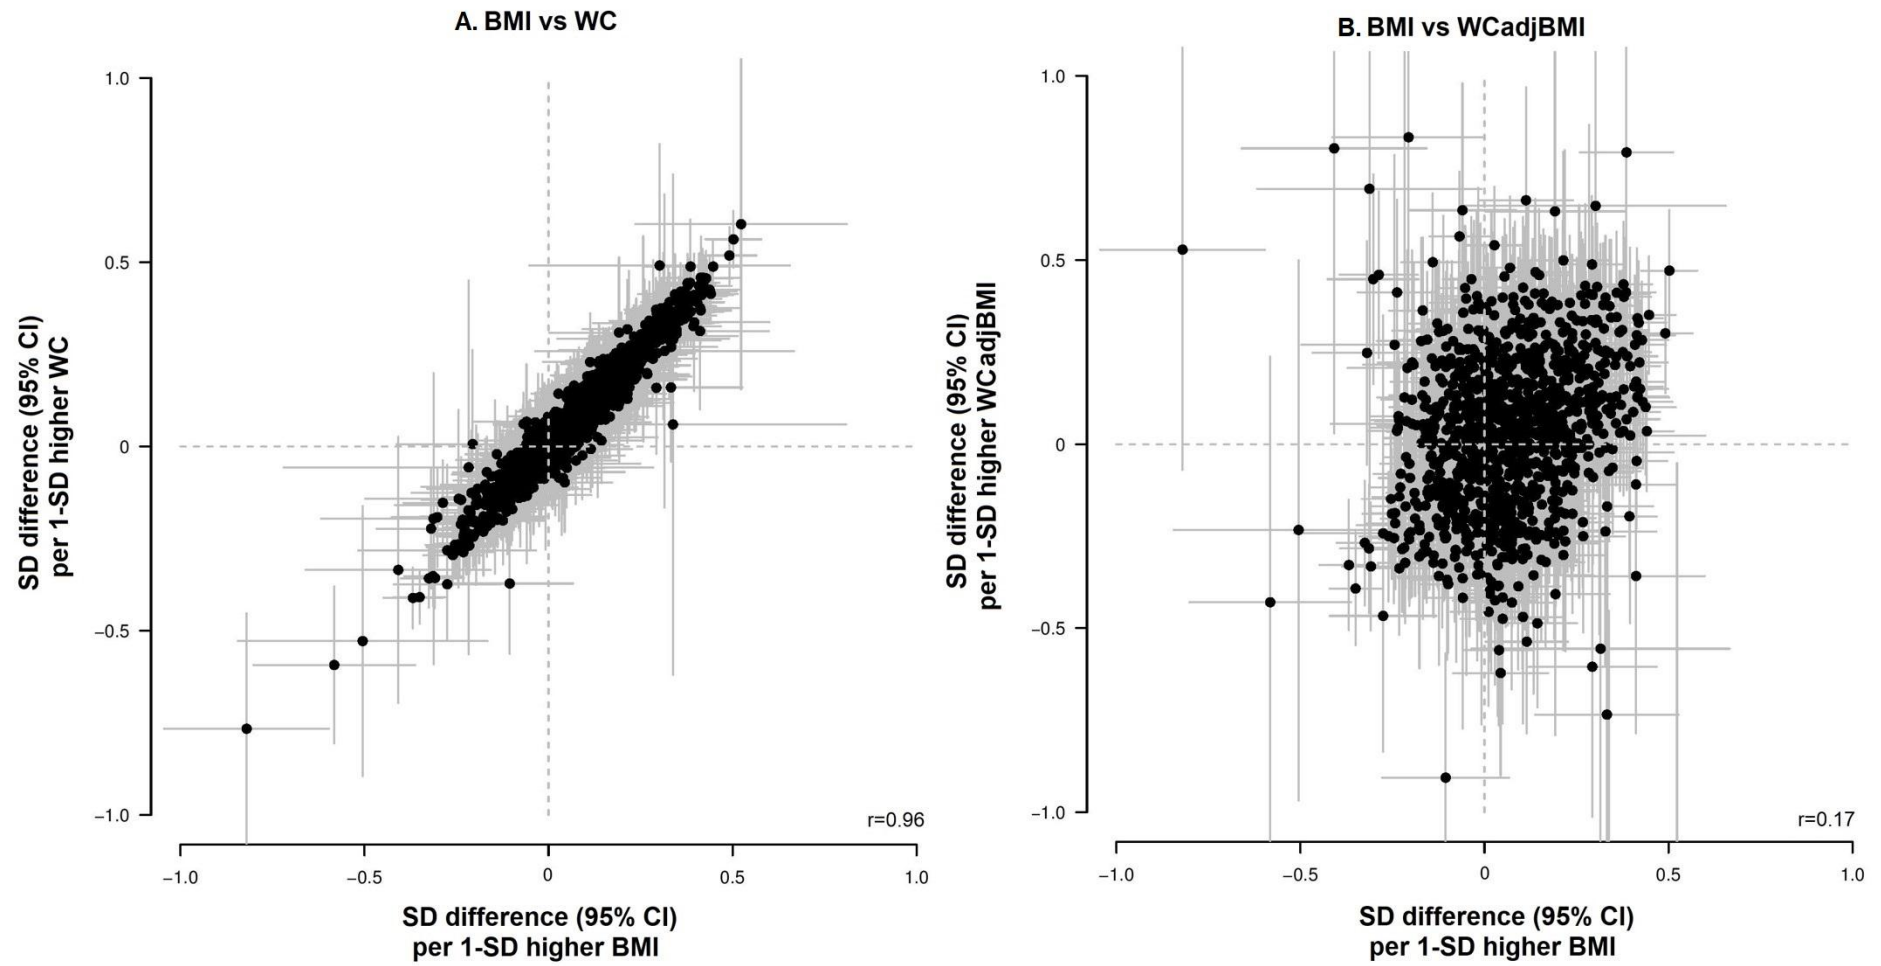



Supplementary Figure 4. Observational and genetic associations of BMI with selected metabolic biomarkers

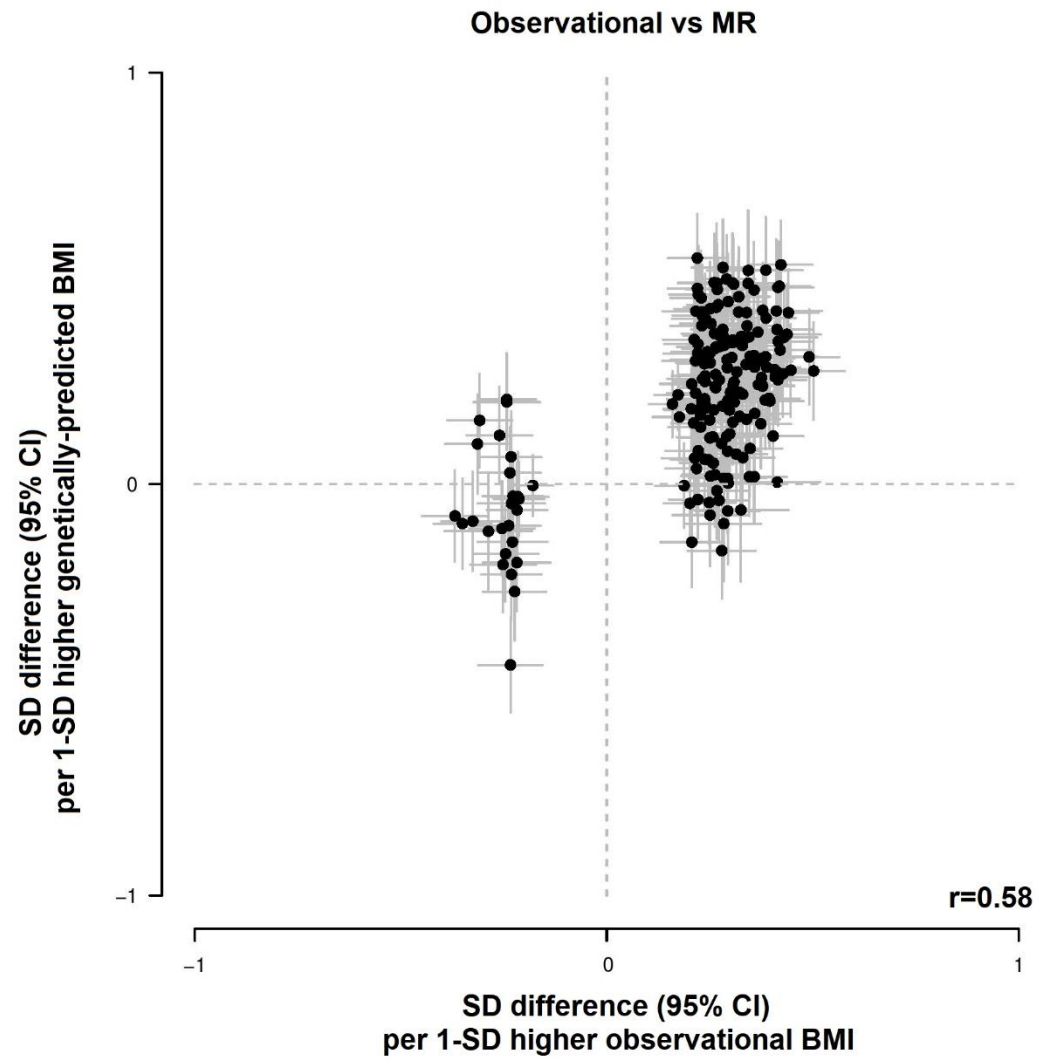

# Supplementary Figure 5. Subgroup analyses of the observational associations of BMI with metabolomics and metabolomics with NAFLD

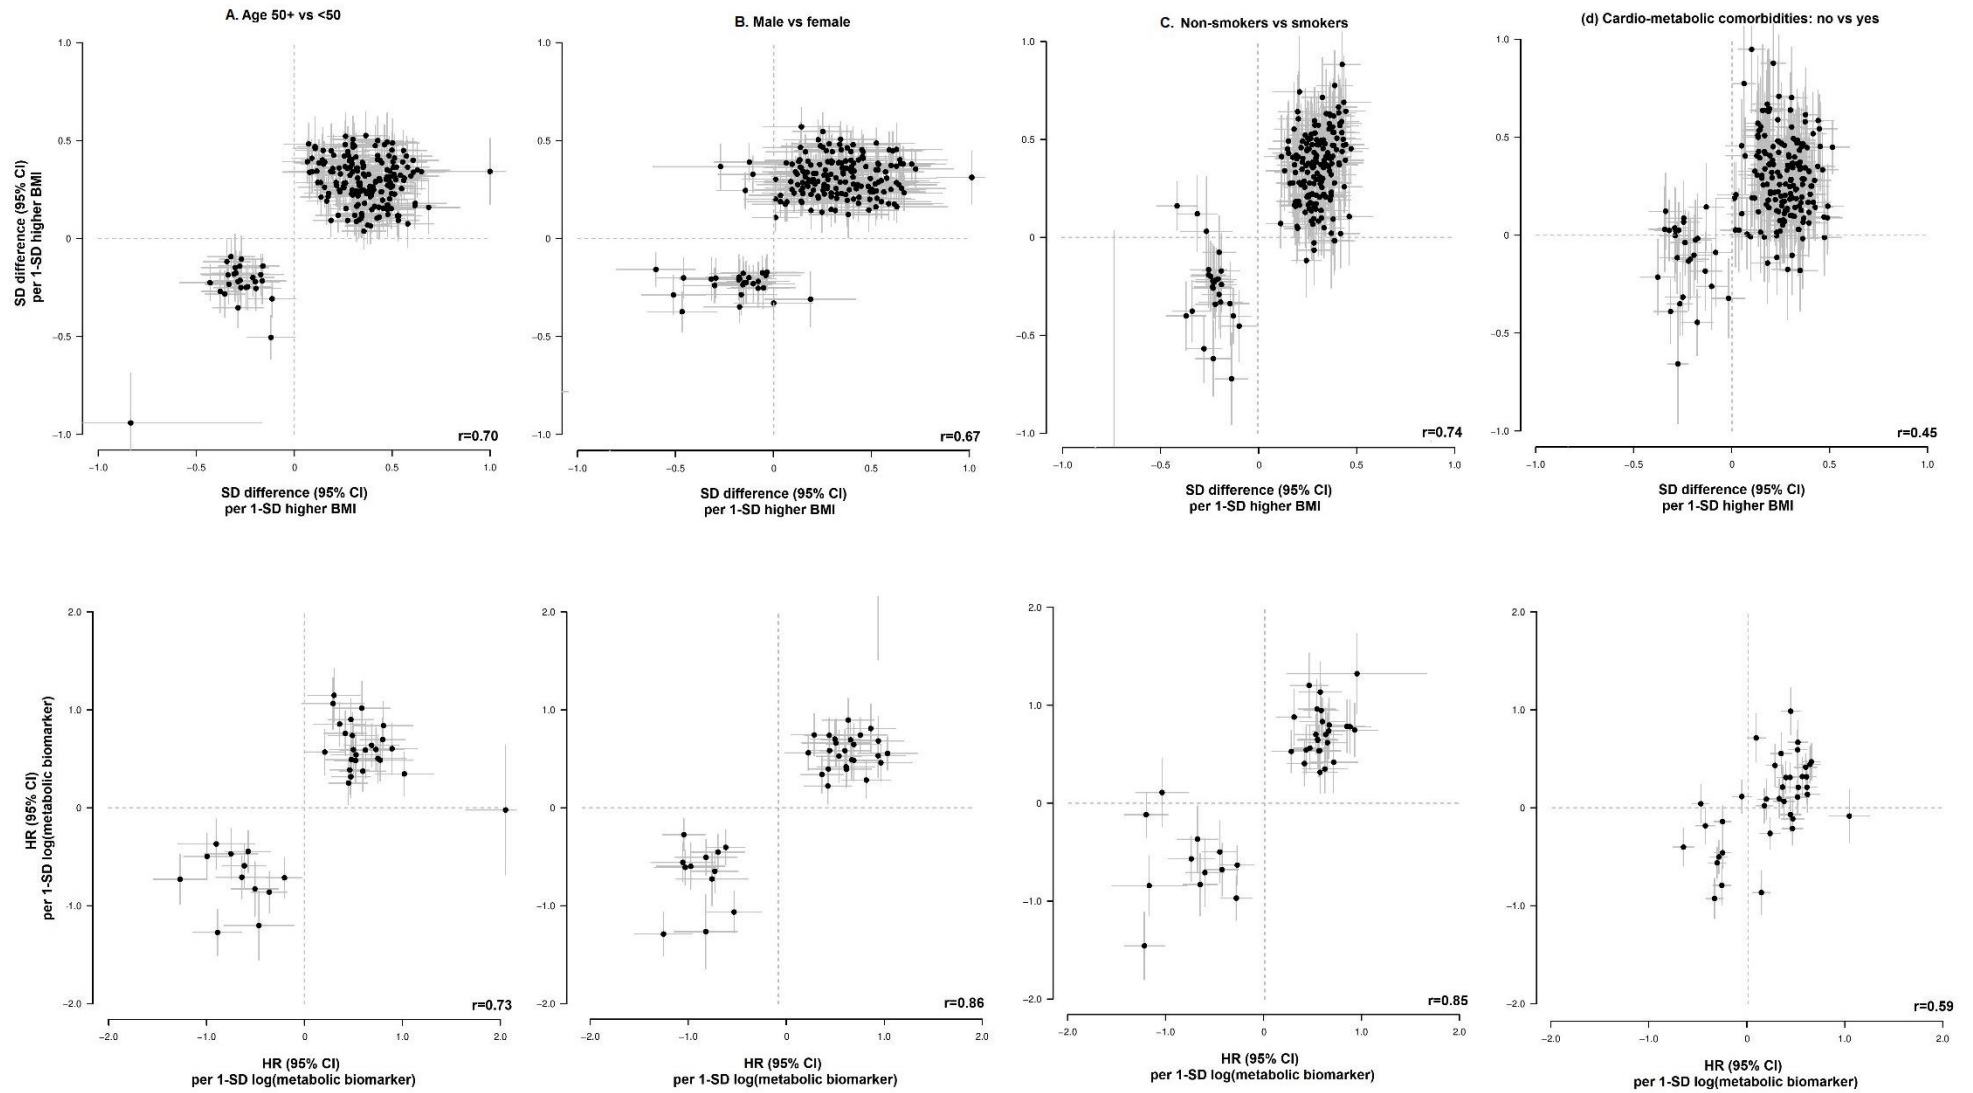

# Supplementary Figure 6. Observational associations of BMI with metabolomics and metabolomics with NAFLD, with additional adjustment

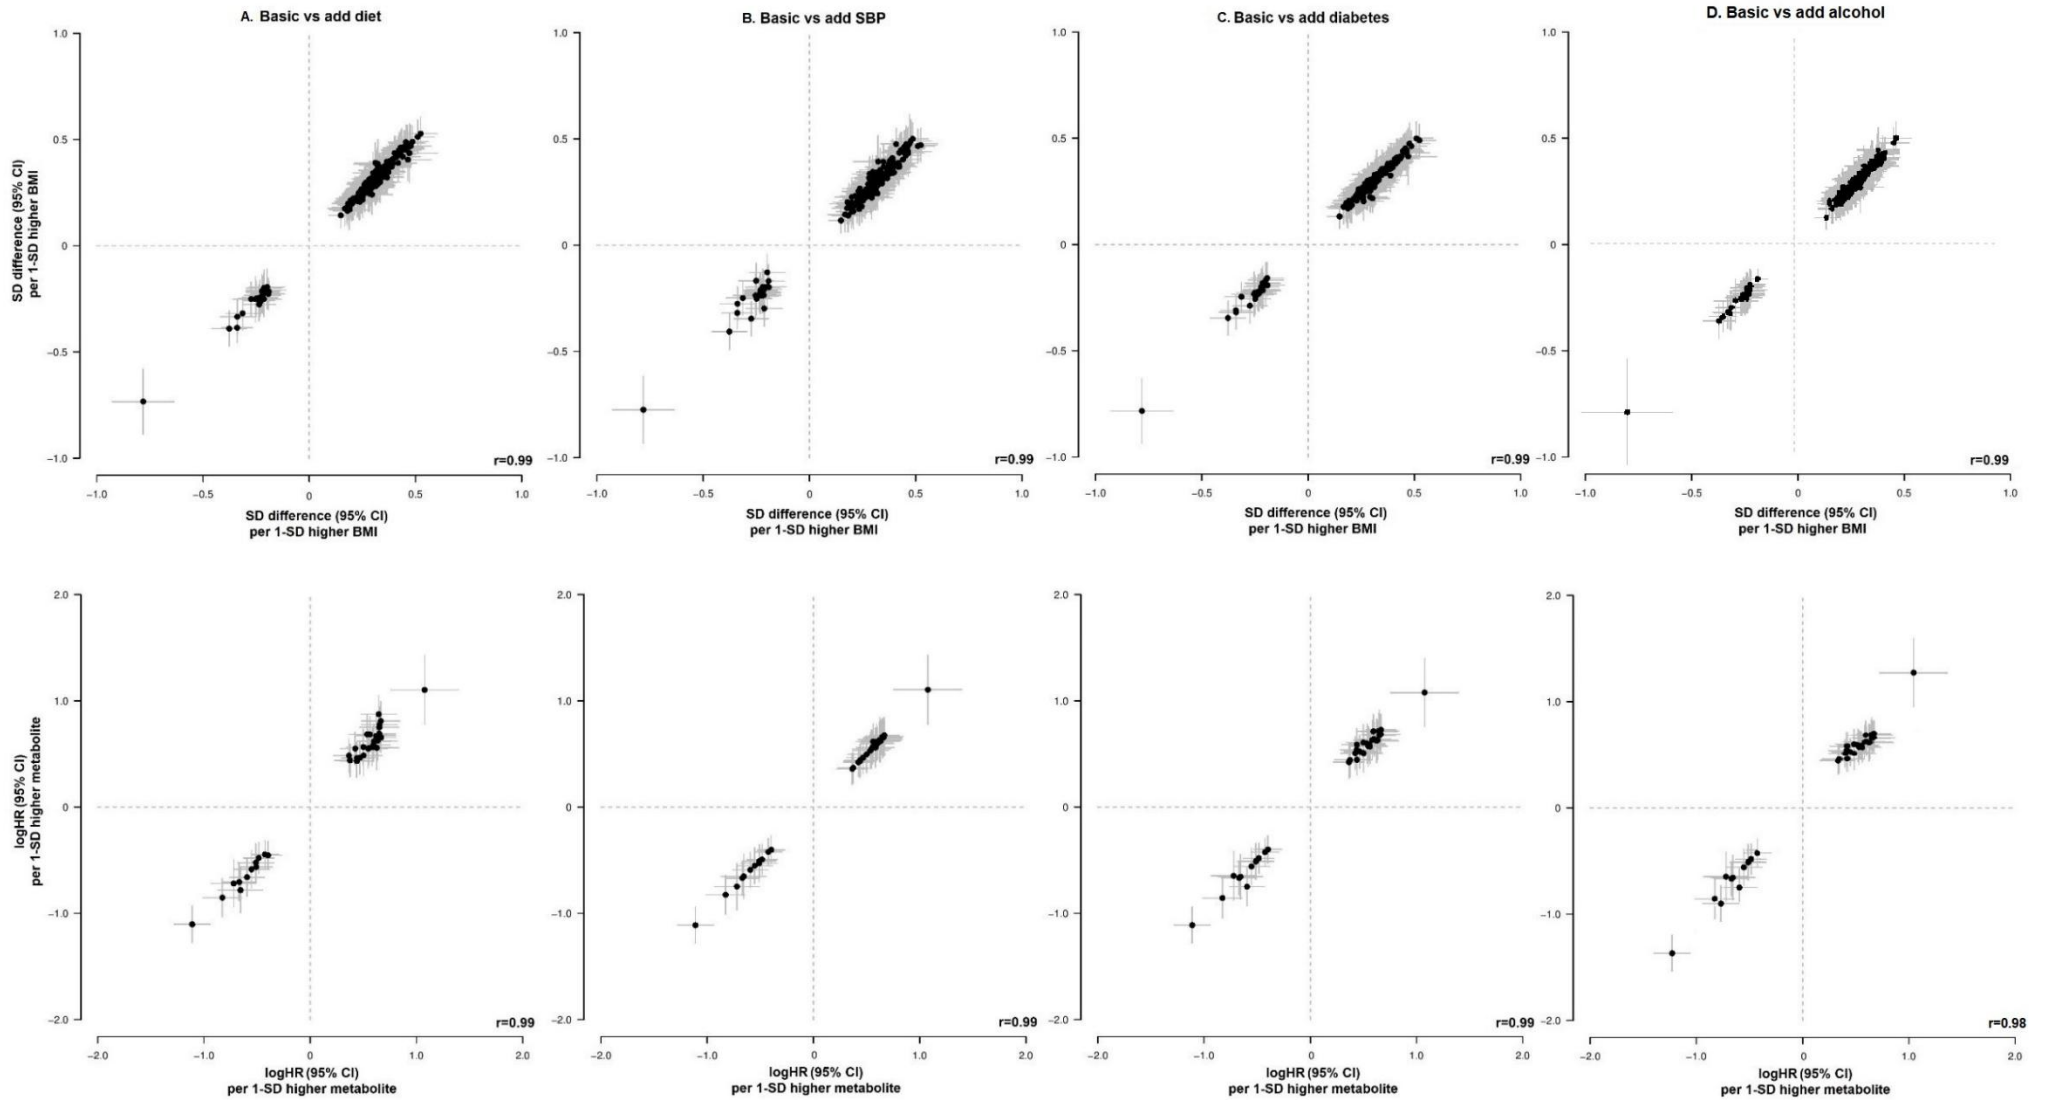

**Supplementary Figure 7. Associations of BMI, metabolomics, and NAFLD risk in CKB for selected metabolic biomarkers identified by previous studies**

**A. OB: BMI and metabolomics    B. MR: BMI and metabolomics    C. OB: Metabolomics and NAFLD**

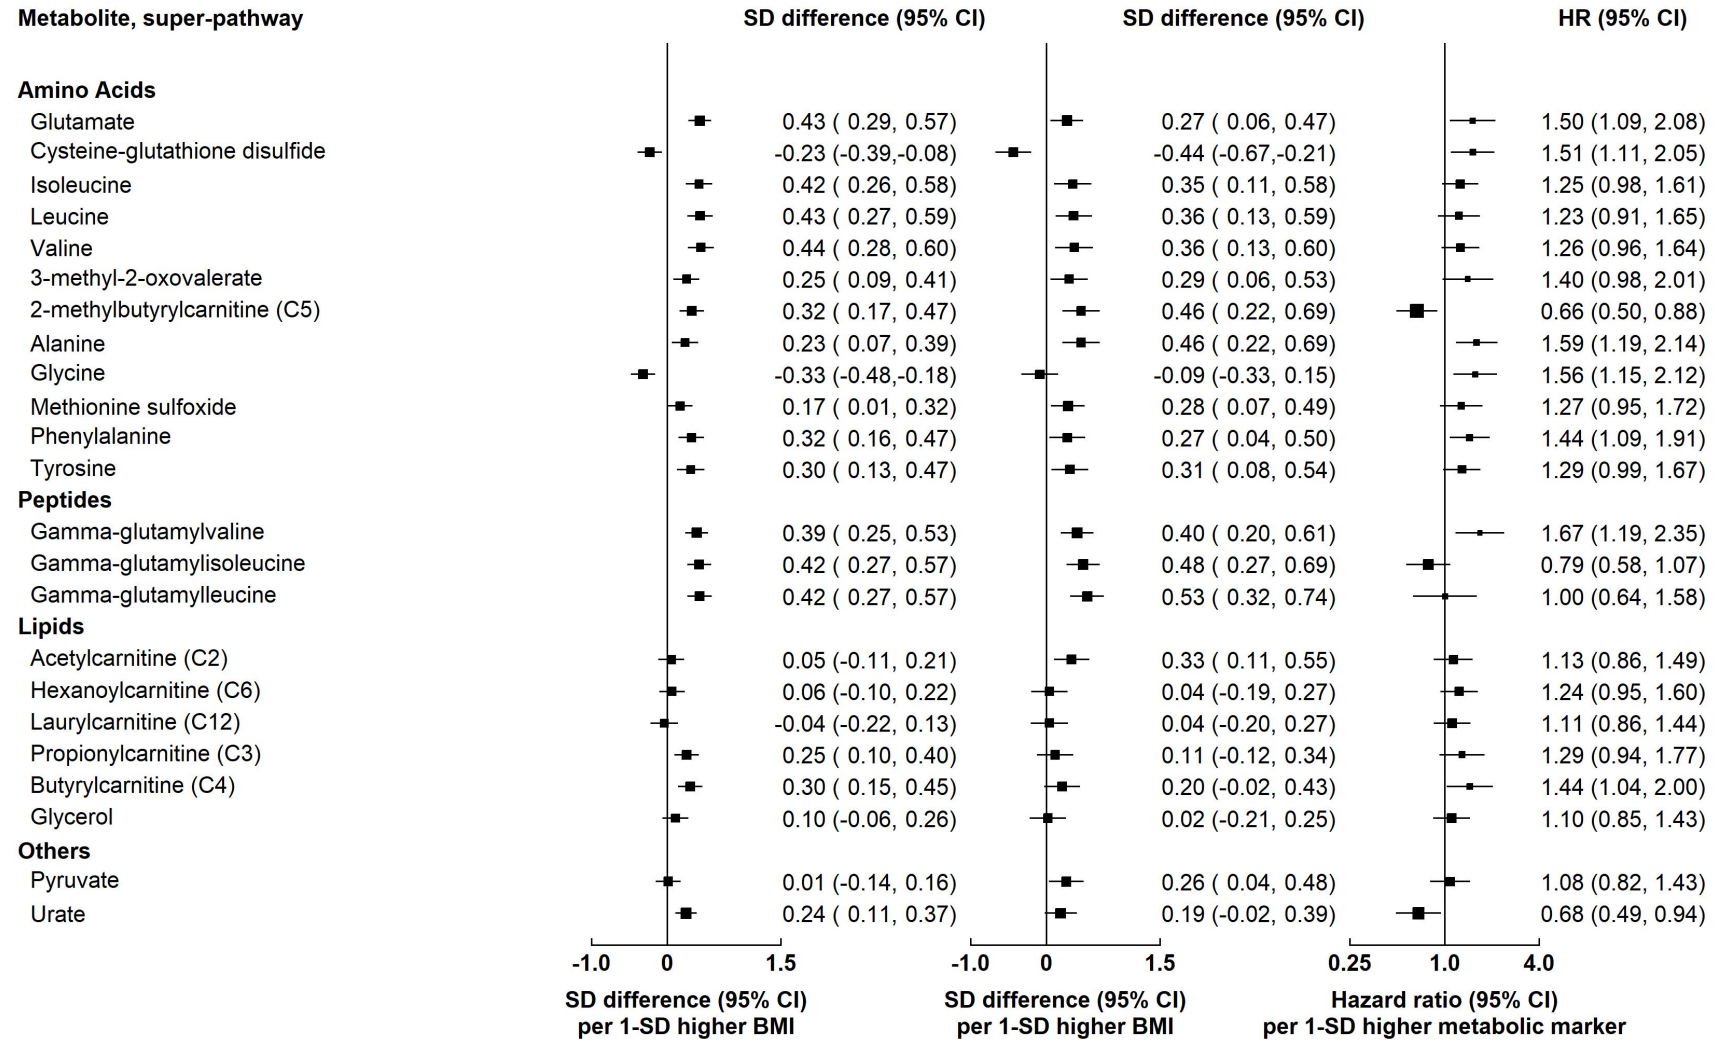

**Supplementary Figure 8. Associations of BMI, metabolomics, and NAFLD risk in CKB for selected metabolic biomarkers identified by previous studies**

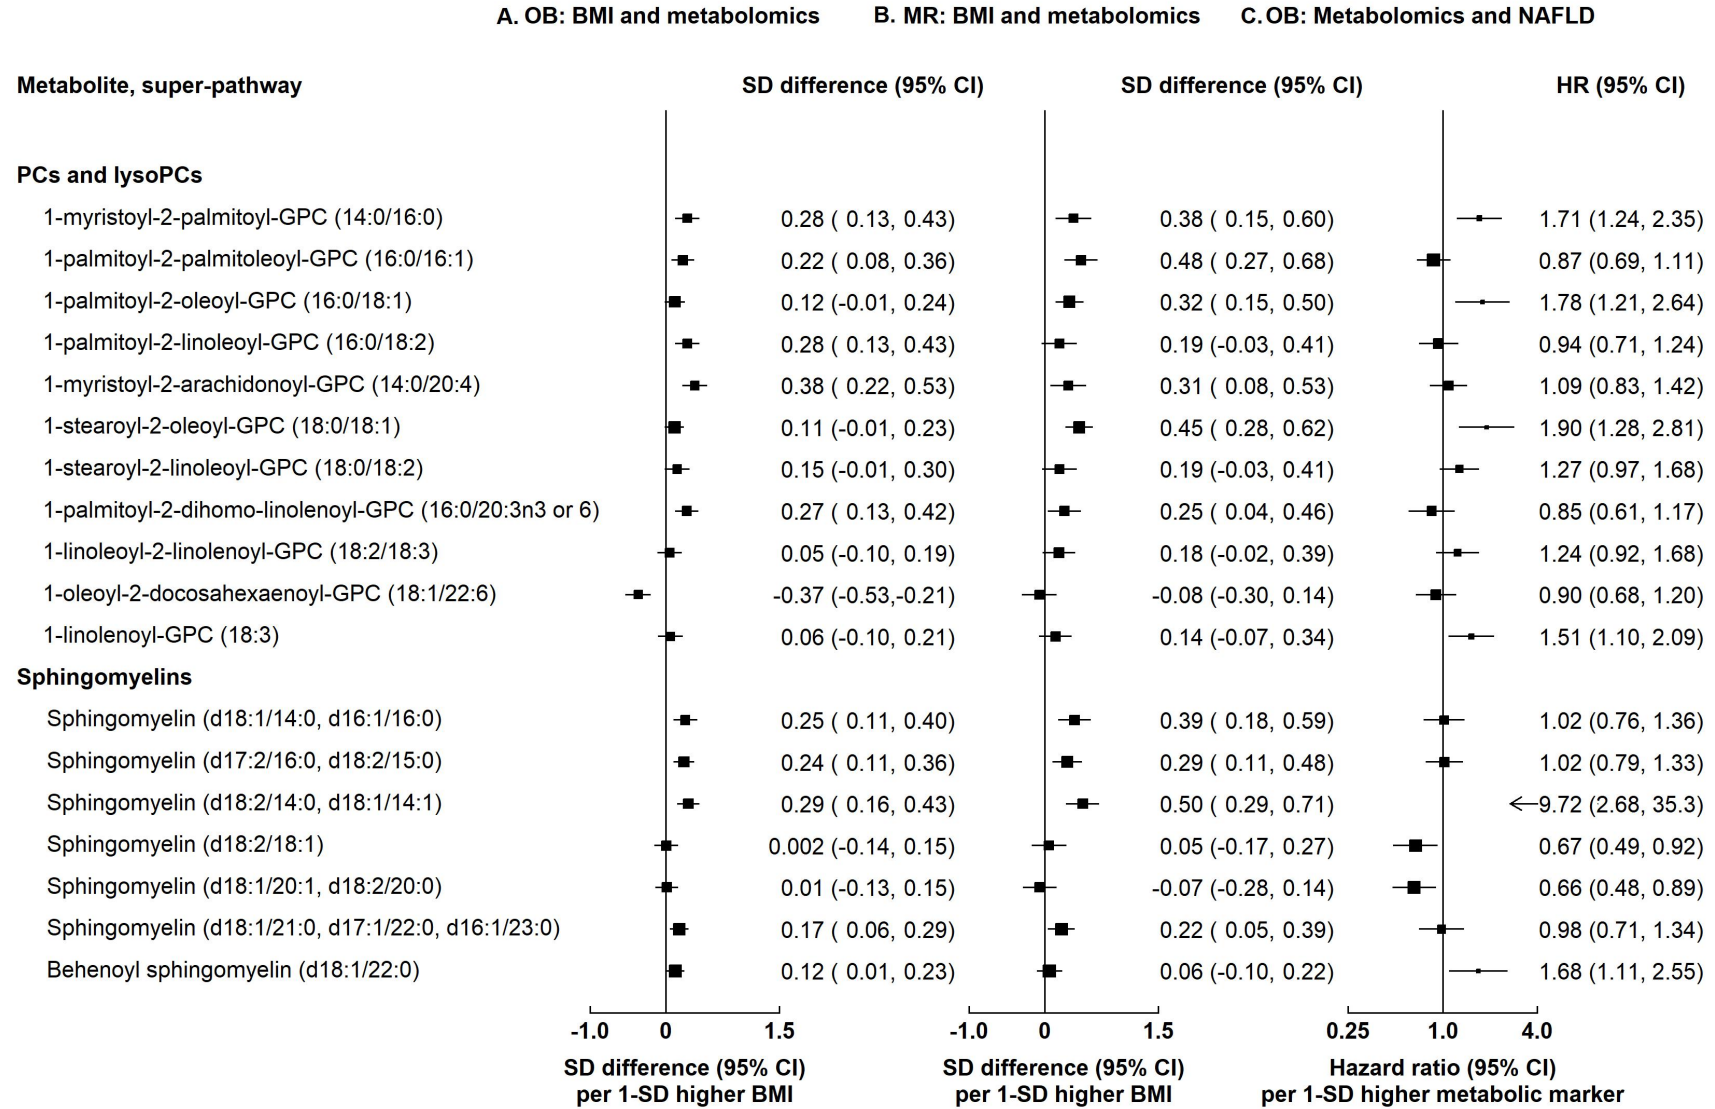

**Supplementary Table 1. Information of 1208 metabolic biomarkers measured by Metabolon**

| Compound ID | Biochemical                                            | Super-pathway | Sub-pathway                                          | PuChem   | CAS         | Group HMDB |
|-------------|--------------------------------------------------------|---------------|------------------------------------------------------|----------|-------------|------------|
| 38768       | (14 or 15)-methylpalmitate (a17:0 or i17:0)            | Lipid         | Fatty Acid, Branched                                 | 17903417 |             |            |
| 38296       | (16 or 17)-methylstearate (a19:0 or i19:0)             | Lipid         | Fatty Acid, Branched                                 | 3083779  | 2724-59-6   | HMDB37397  |
| 62533       | (2,4 or 2,5)-dimethylphenol sulfate                    | Xenobiotics   | Food Component/Plant                                 |          |             |            |
| 57814       | (N(1) + N(8))-acetylspermidine                         | Amino Acid    | Polyamine Metabolism                                 |          |             |            |
| 44621       | 1-(1-enyl-oleoyl)-GPE (P-18:1)*                        | Lipid         | Lysoplasmalogen                                      |          |             |            |
| 52689       | 1-(1-enyl-palmitoyl)-2-arachidonoyl-GPC (P-16:0/20:4)* | Lipid         | Plasmalogen                                          |          |             | HMDB11220  |
| 52673       | 1-(1-enyl-palmitoyl)-2-arachidonoyl-GPE (P-16:0/20:4)* | Lipid         | Plasmalogen                                          |          |             | HMDB11352  |
| 52682       | 1-(1-enyl-palmitoyl)-2-linoleoyl-GPC (P-16:0/18:2)*    | Lipid         | Plasmalogen                                          |          |             | HMDB11211  |
| 52677       | 1-(1-enyl-palmitoyl)-2-linoleoyl-GPE (P-16:0/18:2)*    | Lipid         | Plasmalogen                                          |          |             | HMDB11343  |
| 52478       | 1-(1-enyl-palmitoyl)-2-oleoyl-GPC (P-16:0/18:1)*       | Lipid         | Plasmalogen                                          |          |             |            |
| 52477       | 1-(1-enyl-palmitoyl)-2-oleoyl-GPE (P-16:0/18:1)*       | Lipid         | Plasmalogen                                          |          |             | HMDB11342  |
| 52713       | 1-(1-enyl-palmitoyl)-2-palmitoleoyl-GPC (P-16:0/16:1)* | Lipid         | Plasmalogen                                          |          |             | HMDB11207  |
| 52716       | 1-(1-enyl-palmitoyl)-2-palmitoyl-GPC (P-16:0/16:0)*    | Lipid         | Plasmalogen                                          | 11146967 |             | HMDB11206  |
| 52474       | 1-(1-enyl-palmitoyl)-GPC (P-16:0)*                     | Lipid         | Lysoplasmalogen                                      | 10917802 |             | HMDB10407  |
| 39270       | 1-(1-enyl-palmitoyl)-GPE (P-16:0)*                     | Lipid         | Lysoplasmalogen                                      |          |             |            |
| 52475       | 1-(1-enyl-stearoyl)-2-arachidonoyl-GPE (P-18:0/20:4)*  | Lipid         | Plasmalogen                                          | 9547058  |             | HMDB05779  |
| 52748       | 1-(1-enyl-stearoyl)-2-linoleoyl-GPE (P-18:0/18:2)*     | Lipid         | Plasmalogen                                          |          |             | HMDB11376  |
| 52614       | 1-(1-enyl-stearoyl)-2-oleoyl-GPE (P-18:0/18:1)         | Lipid         | Plasmalogen                                          |          | 144371-68-6 | HMDB11375  |
| 39271       | 1-(1-enyl-stearoyl)-GPE (P-18:0)*                      | Lipid         | Lysoplasmalogen                                      |          |             |            |
| 48762       | 1,2,3-benzenetriol sulfate (2)                         | Xenobiotics   | Chemical                                             |          |             |            |
| 52603       | 1,2-dilinoleoyl-GPC (18:2/18:2)                        | Lipid         | Phosphatidylcholine (PC)                             | 5288075  | 998-06-1    | HMDB08138  |
| 53174       | 1,2-dilinoleoyl-GPE (18:2/18:2)*                       | Lipid         | Phosphatidylethanolamine (PE)                        | 9546812  |             | HMDB09093  |
| 19130       | 1,2-dipalmitoyl-GPC (16:0/16:0)                        | Lipid         | Phosphatidylcholine (PC)                             | 452110   | 63-89-8     | HMDB00564  |
| 57341       | 1,2-dipalmitoyl-GPE (16:0/16:0)*                       | Lipid         | Phosphatidylethanolamine (PE)                        | 445468   |             | HMDB08923  |
| 32391       | 1,3-dimethylurate                                      | Xenobiotics   | Xanthine Metabolism                                  | 70346    | 944-73-0    | HMDB01857  |
| 20675       | 1,5-anhydroglucitol (1,5-AG)                           | Carbohydrate  | Glycolysis, Gluconeogenesis, and Pyruvate Metabolism | 64960    | 154-58-5    | HMDB02712  |
| 34400       | 1,7-dimethylurate                                      | Xenobiotics   | Xanthine Metabolism                                  | 91611    | 33868-03-0  | HMDB11103  |
| 33971       | 10-heptadecenoate (17:1n7)                             | Lipid         | Long Chain Fatty Acid                                | 5312435  | 29743-97-3  | HMDB60038  |

|       |                                               |             |                                           |          |             |           |
|-------|-----------------------------------------------|-------------|-------------------------------------------|----------|-------------|-----------|
| 33972 | 10-nonadecenoate (19:1n9)                     | Lipid       | Long Chain Fatty Acid                     | 5312513  | 73033-09-7  | HMDB13622 |
| 32497 | 10-undecenoate (11:1n1)                       | Lipid       | Medium Chain Fatty Acid                   | 14891    | 1333-28-4   | HMDB33724 |
| 47135 | 11-ketoetiocholanolone glucuronide            | Lipid       | Androgenic Steroids                       |          | 17181-16-7  |           |
| 38395 | 12,13-DiHOME                                  | Lipid       | Fatty Acid, Dihydroxy                     | 10236635 | 263399-35-5 | HMDB04705 |
| 37752 | 13-HODE + 9-HODE                              | Lipid       | Fatty Acid, Monohydroxy                   | 43013    |             |           |
| 38168 | 16a-hydroxy DHEA 3-sulfate                    | Lipid       | Androgenic Steroids                       |          |             |           |
| 39609 | 16-hydroxypalmitate                           | Lipid       | Fatty Acid, Monohydroxy                   | 10466    | 506-13-8    | HMDB06294 |
| 37482 | 17alpha-hydroxypregnenolone 3-sulfate         | Lipid       | Pregnenolone Steroids                     | 152971   | 28901-70-4  | HMDB00416 |
| 46325 | 1-arachidonoyl-GPA (20:4)                     | Lipid       | Lysophospholipid                          |          | 799268-65-8 |           |
| 33228 | 1-arachidonoyl-GPC* (20:4)*                   | Lipid       | Lysophospholipid                          |          |             | HMDB10395 |
| 35186 | 1-arachidonoyl-GPE (20:4n6)*                  | Lipid       | Lysophospholipid                          | 42607465 |             | HMDB11517 |
| 34214 | 1-arachidonoyl-GPI* (20:4)*                   | Lipid       | Lysophospholipid                          |          |             | HMDB61690 |
| 34397 | 1-arachidonoylglycerol (20:4)                 | Lipid       | Monoacylglycerol                          | 5282281  | 35474-99-8  | HMDB11549 |
| 62558 | 1-carboxyethylisoleucine                      | Amino Acid  | Leucine, Isoleucine and Valine Metabolism |          |             |           |
| 62559 | 1-carboxyethylleucine                         | Amino Acid  | Leucine, Isoleucine and Valine Metabolism |          |             |           |
| 62566 | 1-carboxyethylphenylalanine                   | Amino Acid  | Phenylalanine Metabolism                  |          |             |           |
| 62564 | 1-carboxyethyltyrosine                        | Amino Acid  | Tyrosine Metabolism                       |          |             |           |
| 62562 | 1-carboxyethylvaline                          | Amino Acid  | Leucine, Isoleucine and Valine Metabolism |          |             |           |
| 48341 | 1-dihomo-linolenylglycerol (20:3)             | Lipid       | Monoacylglycerol                          |          |             |           |
| 35103 | 1-dihomo-linoleoylglycerol (20:2)             | Lipid       | Monoacylglycerol                          |          |             |           |
| 35153 | 1-docosahexaenoylglycerol (22:6)              | Lipid       | Monoacylglycerol                          |          |             | HMDB11587 |
| 57783 | 1H-indole-7-acetic acid                       | Xenobiotics | Bacterial/Fungal                          |          | 39689-63-9  |           |
| 49617 | 1-lignoceroyl-GPC (24:0)                      | Lipid       | Lysophospholipid                          |          | 325171-59-3 | HMDB10405 |
| 34393 | 1-linolenoylglycerol (18:3)                   | Lipid       | Monoacylglycerol                          | 53480978 | 124151-74-2 | HMDB11569 |
| 45951 | 1-linolenoyl-GPC (18:3)*                      | Lipid       | Lysophospholipid                          |          |             | HMDB10388 |
| 52710 | 1-linoleoyl-2-arachidonoyl-GPC (18:2/20:4n6)* | Lipid       | Phosphatidylcholine (PC)                  |          |             | HMDB08147 |
| 53176 | 1-linoleoyl-2-linolenoyl-GPC (18:2/18:3)*     | Lipid       | Phosphatidylcholine (PC)                  |          |             | HMDB08141 |
| 27447 | 1-linoleoylglycerol (18:2)                    | Lipid       | Monoacylglycerol                          | 5283469  | 2277-28-3   |           |
| 52690 | 1-linoleoyl-GPA (18:2)*                       | Lipid       | Lysophospholipid                          |          |             | HMDB07856 |
| 34419 | 1-linoleoyl-GPC (18:2)                        | Lipid       | Lysophospholipid                          | 11988421 |             | HMDB10386 |
| 36600 | 1-linoleoyl-GPE (18:2)*                       | Lipid       | Lysophospholipid                          | 52925130 |             | HMDB11507 |
| 54885 | 1-linoleoyl-GPG (18:2)*                       | Lipid       | Lysophospholipid                          |          |             |           |

|       |                                                         |                        |                                        |          |                       |           |
|-------|---------------------------------------------------------|------------------------|----------------------------------------|----------|-----------------------|-----------|
| 36594 | 1-linoleoyl-GPI* (18:2)*                                | Lipid                  | Lysophospholipid                       |          |                       |           |
| 32350 | 1-methyl-4-imidazoleacetate                             | Amino Acid             | Histidine Metabolism                   | 75810    | 2625-49-2             | HMDB02820 |
| 62946 | 1-methyl-5-imidazoleacetate                             | Amino Acid             | Histidine Metabolism                   | 6451814  | 4200-48-0             | HMDB04988 |
| 30460 | 1-methylhistidine                                       | Amino Acid             | Histidine Metabolism                   | 92105    | 332-80-9              | HMDB00001 |
| 27665 | 1-methylnicotinamide                                    | Cofactors and Vitamins | Nicotinate and Nicotinamide Metabolism | 10129985 | 1005-24-9             | HMDB00699 |
| 34395 | 1-methylurate                                           | Xenobiotics            | Xanthine Metabolism                    | 69726    | 708-79-2              | HMDB03099 |
| 53195 | 1-myristoyl-2-arachidonoyl-GPC (14:0/20:4)*             | Lipid                  | Phosphatidylcholine (PC)               |          |                       | HMDB07883 |
| 19258 | 1-myristoyl-2-palmitoyl-GPC (14:0/16:0)                 | Lipid                  | Phosphatidylcholine (PC)               | 129657   | 69525-80-0            | HMDB07869 |
| 52697 | 1-oleoyl-2-docosahexaenoyl-GPC (18:1/22:6)*             | Lipid                  | Phosphatidylcholine (PC)               |          |                       | HMDB08123 |
| 52687 | 1-oleoyl-2-linoleoyl-GPE (18:1/18:2)*                   | Lipid                  | Phosphatidylethanolamine (PE)          | 9546753  |                       | HMDB05349 |
| 21184 | 1-oleoylglycerol (18:1)                                 | Lipid                  | Monoacylglycerol                       | 5283468  | 111-03-5              | HMDB11567 |
| 36812 | 1-oleoylglycerophosphate (18:1)                         | Lipid                  | Lysophospholipid                       | 5497152  | 325465-93-8           |           |
| 48258 | 1-oleoyl-GPC (18:1)                                     | Lipid                  | Lysophospholipid                       | 16081932 | 19420-56-5            | HMDB02815 |
| 35628 | 1-oleoyl-GPE (18:1)                                     | Lipid                  | Lysophospholipid                       | 9547071  | 89576-29-4            | HMDB11506 |
| 45968 | 1-oleoyl-GPG (18:1)*                                    | Lipid                  | Lysophospholipid                       |          |                       |           |
| 36602 | 1-oleoyl-GPI (18:1)*                                    | Lipid                  | Lysophospholipid                       |          |                       |           |
| 53180 | 1-palmitoleoyl-2-linolenoyl-GPC (16:1/18:3)*            | Lipid                  | Phosphatidylcholine (PC)               |          |                       | HMDB08008 |
| 52431 | 1-palmitoleoylglycerol (16:1)*                          | Lipid                  | Monoacylglycerol                       |          |                       | HMDB11565 |
| 33230 | 1-palmitoleoyl-GPC* (16:1)*                             | Lipid                  | Lysophospholipid                       | 24779461 |                       | HMDB10383 |
| 52462 | 1-palmitoyl-2-arachidonoyl-GPC (16:0/20:4n6)            | Lipid                  | Phosphatidylcholine (PC)               | 10747814 | 35418-58-7            | HMDB07982 |
| 52464 | 1-palmitoyl-2-arachidonoyl-GPE (16:0/20:4)*             | Lipid                  | Phosphatidylethanolamine (PE)          | 9546800  |                       | HMDB05323 |
| 52467 | 1-palmitoyl-2-arachidonoyl-GPI (16:0/20:4)*             | Lipid                  | Phosphatidylinositol (PI)              |          |                       | HMDB09789 |
| 52454 | 1-palmitoyl-2-dihomo-linolenoyl-GPC (16:0/20:3n3 or 6)* | Lipid                  | Phosphatidylcholine (PC)               |          |                       |           |
| 52610 | 1-palmitoyl-2-docosahexaenoyl-GPC (16:0/22:6)           | Lipid                  | Phosphatidylcholine (PC)               | 6441886  | 59403-54-2            | HMDB07991 |
| 52465 | 1-palmitoyl-2-docosahexaenoyl-GPE (16:0/22:6)*          | Lipid                  | Phosphatidylethanolamine (PE)          | 9546799  |                       | HMDB05324 |
| 42446 | 1-palmitoyl-2-linoleoyl-GPC (16:0/18:2)                 | Lipid                  | Phosphatidylcholine (PC)               | 5287971  | 40811-94-7            | HMDB07973 |
| 42449 | 1-palmitoyl-2-linoleoyl-GPE (16:0/18:2)                 | Lipid                  | Phosphatidylethanolamine (PE)          | 9546747  |                       | HMDB05322 |
| 52450 | 1-palmitoyl-2-linoleoyl-GPI (16:0/18:2)                 | Lipid                  | Phosphatidylinositol (PI)              |          |                       | HMDB09784 |
| 52461 | 1-palmitoyl-2-oleoyl-GPC (16:0/18:1)                    | Lipid                  | Phosphatidylcholine (PC)               | 6436017  | 26853-31-6;26853-31-6 | HMDB07972 |
| 19263 | 1-palmitoyl-2-oleoyl-GPE (16:0/18:1)                    | Lipid                  | Phosphatidylethanolamine (PE)          | 5283496  | 26662-94-2            | HMDB05320 |
| 52669 | 1-palmitoyl-2-oleoyl-GPI (16:0/18:1)*                   | Lipid                  | Phosphatidylinositol (PI)              |          |                       | HMDB09783 |
| 52470 | 1-palmitoyl-2-palmitoleoyl-GPC (16:0/16:1)*             | Lipid                  | Phosphatidylcholine (PC)               |          |                       | HMDB07969 |



|       |                                                  |             |                                                  |          |                    |           |
|-------|--------------------------------------------------|-------------|--------------------------------------------------|----------|--------------------|-----------|
| 52616 | 1-palmitoyl-2-stearoyl-GPC (16:0/18:0)           | Lipid       | Phosphatidylcholine (PC)                         |          | 59403-51-9         | HMDB07970 |
| 57388 | 1-palmitoyl-2-stearoyl-GPE (16:0/18:0)*          | Lipid       | Phosphatidylethanolamine (PE)                    | 5326793  |                    | HMDB08925 |
| 33955 | 1-palmitoyl-GPC (16:0)                           | Lipid       | Lysophospholipid                                 | 86554    | 17364-16-8         | HMDB10382 |
| 35631 | 1-palmitoyl-GPE (16:0)                           | Lipid       | Lysophospholipid                                 | 9547069  | 53862-35-4         | HMDB11503 |
| 45970 | 1-palmitoyl-GPG (16:0)*                          | Lipid       | Lysophospholipid                                 | 3300276  |                    |           |
| 35305 | 1-palmitoyl-GPI* (16:0)                          | Lipid       | Lysophospholipid                                 |          |                    | HMDB61695 |
| 61868 | 1-ribosyl-imidazoleacetate*                      | Amino Acid  | Histidine Metabolism                             | 5117448  | 29605-99-0         | HMDB02331 |
| 42450 | 1-stearoyl-2-arachidonoyl-GPC (18:0/20:4)        | Lipid       | Phosphatidylcholine (PC)                         | 16219824 | 35418-59-8         | HMDB08048 |
| 52447 | 1-stearoyl-2-arachidonoyl-GPE (18:0/20:4)        | Lipid       | Phosphatidylethanolamine (PE)                    | 5289133  |                    | HMDB09003 |
| 52449 | 1-stearoyl-2-arachidonoyl-GPI (18:0/20:4)        | Lipid       | Phosphatidylinositol (PI)                        |          | 383907-33-3        | HMDB09815 |
| 52611 | 1-stearoyl-2-docosahexaenoyl-GPC (18:0/22:6)     | Lipid       | Phosphatidylcholine (PC)                         |          | 59403-52-0         | HMDB08057 |
| 52466 | 1-stearoyl-2-docosahexaenoyl-GPE (18:0/22:6)*    | Lipid       | Phosphatidylethanolamine (PE)                    | 9546798  |                    | HMDB05334 |
| 52452 | 1-stearoyl-2-linoleoyl-GPC (18:0/18:2)*          | Lipid       | Phosphatidylcholine (PC)                         |          |                    | HMDB08039 |
| 52446 | 1-stearoyl-2-linoleoyl-GPE (18:0/18:2)*          | Lipid       | Phosphatidylethanolamine (PE)                    | 9546749  |                    | HMDB08994 |
| 52468 | 1-stearoyl-2-linoleoyl-GPI (18:0/18:2)           | Lipid       | Phosphatidylinositol (PI)                        |          |                    | HMDB09809 |
| 52438 | 1-stearoyl-2-oleoyl-GPC (18:0/18:1)              | Lipid       | Phosphatidylcholine (PC)                         |          | 56421-10-4         | HMDB08038 |
| 42448 | 1-stearoyl-2-oleoyl-GPE (18:0/18:1)              | Lipid       | Phosphatidylethanolamine (PE)                    |          |                    | HMDB08993 |
| 52726 | 1-stearoyl-2-oleoyl-GPI (18:0/18:1)*             | Lipid       | Phosphatidylinositol (PI)                        |          |                    |           |
| 19265 | 1-stearoyl-2-oleoyl-GPS (18:0/18:1)              | Lipid       | Phosphatidylserine (PS)                          | 9547087  |                    | HMDB10163 |
| 33961 | 1-stearoyl-GPC (18:0)                            | Lipid       | Lysophospholipid                                 | 497299   | 19420-57-6         | HMDB10384 |
| 42398 | 1-stearoyl-GPE (18:0)                            | Lipid       | Lysophospholipid                                 | 9547068  | 69747-55-3         | HMDB11130 |
| 34437 | 1-stearoyl-GPG (18:0)                            | Lipid       | Lysophospholipid                                 |          |                    |           |
| 19324 | 1-stearoyl-GPI (18:0)                            | Lipid       | Lysophospholipid                                 |          | 796963-93-4        | HMDB61696 |
| 62885 | 2,2'-Methylenebis(6-tert-butyl-p-cresol)         | Xenobiotics | Chemical                                         | 8398     | 119-47-1           |           |
| 57547 | 2,3-dihydroxy-2-methylbutyrate                   | Amino Acid  | Leucine, Isoleucine and Valine Metabolism        | 301941   | 14868-24-7         | HMDB29576 |
| 62805 | 2,3-dihydroxy-5-methylthio-4-pentenoate (DMTPA)* | Amino Acid  | Methionine, Cysteine, SAM and Taurine Metabolism |          |                    |           |
| 38276 | 2,3-dihydroxyisovalerate                         | Xenobiotics | Food Component/Plant                             | 677      | 1756-18-9          | HMDB12141 |
| 46115 | 21-hydroxypregnenolone disulfate                 | Lipid       | Pregnenolone Steroids                            | 134595   | 1164-98-3          |           |
| 6146  | 2-aminoadipate                                   | Amino Acid  | Lysine Metabolism                                | 469      | 542-32-5;1118-90-7 | HMDB00510 |
| 42374 | 2-aminobutyrate                                  | Amino Acid  | Glutathione Metabolism                           | 439691   | 1492-24-6          | HMDB00650 |
| 43761 | 2-aminoheptanoate                                | Lipid       | Fatty Acid, Amino                                | 227939   | 1115-90-8          |           |

|       |                                        |             |                                              |          |             |           |
|-------|----------------------------------------|-------------|----------------------------------------------|----------|-------------|-----------|
| 43343 | 2-aminooctanoate                       | Lipid       | Fatty Acid, Amino                            | 69522    | 644-90-6    | HMDB00991 |
| 43266 | 2-aminophenol sulfate                  | Xenobiotics | Chemical                                     | 181670   |             | HMDB61116 |
| 61785 | 2-butenoylglycine                      | Lipid       | Fatty Acid<br>Metabolism(Acyl Glycine)       | 6303498  | 71428-89-2  |           |
| 52602 | 2'-deoxyuridine                        | Nucleotide  | Pyrimidine Metabolism,<br>Uracil containing  | 13712    | 951-78-0    | HMDB00012 |
| 36847 | 2-ethylphenylsulfate                   | Xenobiotics | Benzoate Metabolism                          |          |             |           |
| 36746 | 2-hydroxy-3-methylvalerate             | Amino Acid  | Leucine, Isoleucine and<br>Valine Metabolism | 164623   | 488-15-3    | HMDB00317 |
| 33173 | 2-hydroxyacetaminophen sulfate*        | Xenobiotics | Drug - Analgesics,<br>Anesthetics            | 86290013 |             |           |
| 61700 | 2-hydroxyarachidate*                   | Lipid       | Fatty Acid, Monohydroxy                      | 5225199  |             |           |
| 57663 | 2-hydroxybehenate                      | Lipid       | Fatty Acid, Monohydroxy                      | 193484   |             |           |
| 52281 | 2-hydroxybutyrate/2-hydroxyisobutyrate | Amino Acid  | Glutathione Metabolism                       |          |             |           |
| 42489 | 2-hydroxydecanoate                     | Lipid       | Fatty Acid, Monohydroxy                      | 21488    | 5393-81-7   |           |
| 62528 | 2-hydroxyfluorene sulfate              | Xenobiotics | Tobacco Metabolite                           |          |             |           |
| 37253 | 2-hydroxyglutarate                     | Lipid       | Fatty Acid, Dicarboxylate                    | 43       | 40951-21-1  | HMDB00606 |
| 61827 | 2-hydroxyheptanoate*                   | Lipid       | Fatty Acid, Monohydroxy                      | 2750949  |             |           |
| 18281 | 2-hydroxyhippurate (salicylurate)      | Xenobiotics | Benzoate Metabolism                          | 10253    | 487-54-7    | HMDB00840 |
| 43330 | 2-hydroxyibuprofen                     | Xenobiotics | Drug - Analgesics,<br>Anesthetics            | 10443535 | 51146-55-5  | HMDB60920 |
| 52916 | 2-hydroxylaurate                       | Lipid       | Fatty Acid, Monohydroxy                      | 97783    | 2984-55-6   |           |
| 61698 | 2-hydroxynervonate*                    | Lipid       | Fatty Acid, Monohydroxy                      | 5312783  |             |           |
| 22036 | 2-hydroxyoctanoate                     | Lipid       | Fatty Acid, Monohydroxy                      | 94180    | 617-73-2    | HMDB02264 |
| 35675 | 2-hydroxypalmitate                     | Lipid       | Fatty Acid, Monohydroxy                      | 92836    | 764-67-0    | HMDB31057 |
| 1432  | 2-hydroxyphenylacetate                 | Amino Acid  | Phenylalanine Metabolism                     | 11970    | 614-75-5    | HMDB00669 |
| 52922 | 2-hydroxyphenylacetate sulfate         | Amino Acid  | Phenylalanine Metabolism                     |          |             |           |
| 17945 | 2-hydroxystearate                      | Lipid       | Fatty Acid, Monohydroxy                      | 69417    | 629-22-1    |           |
| 15667 | 2-isopropylmalate                      | Xenobiotics | Food Component/Plant                         | 77       | 3237-44-3   | HMDB00402 |
| 48141 | 2-keto-3-deoxy-gluconate               | Xenobiotics | Food Component/Plant                         | 161227   | 17510-99-5  | HMDB01353 |
| 32506 | 2-linoleoylglycerol (18:2)             | Lipid       | Monoacylglycerol                             | 5365676  | 3443-82-1   | HMDB11538 |
| 33161 | 2-methoxyacetaminophen glucuronide*    | Xenobiotics | Drug - Analgesics,<br>Anesthetics            | 14367271 |             |           |
| 47031 | 2-methoxyacetaminophen sulfate*        | Xenobiotics | Drug - Analgesics,<br>Anesthetics            | 86290014 |             |           |
| 45095 | 2-methylbutyrylcarnitine (C5)          | Amino Acid  | Leucine, Isoleucine and<br>Valine Metabolism | 6426901  | 31023-25-3  | HMDB00378 |
| 52282 | 2-methylcitrate/homocitrate            | Energy      | TCA Cycle                                    |          |             |           |
| 35482 | 2-methylmalonylcarnitine (C4-DC)       | Lipid       | Fatty Acid Synthesis                         | 53481628 | 149181-64-6 | HMDB13133 |

|       |                                                         |             |                                                |          |                        |           |
|-------|---------------------------------------------------------|-------------|------------------------------------------------|----------|------------------------|-----------|
| 62520 | 2-naphthol sulfate                                      | Xenobiotics | Chemical                                       | 74428    |                        |           |
| 21232 | 2-oleoylglycerol (18:1)                                 | Lipid       | Monoacylglycerol                               | 5319879  | 3443-84-3              | HMDB11537 |
| 57554 | 2'-O-methylcytidine                                     | Nucleotide  | Pyrimidine Metabolism,<br>Cytidine containing  | 150971   | 2140-72-9              |           |
| 57655 | 2'-O-methyluridine                                      | Nucleotide  | Pyrimidine Metabolism,<br>Uracil containing    | 102212   | 2140-76-3              |           |
| 55072 | 2-oxoarginine*                                          | Amino Acid  | Urea cycle; Arginine and<br>Proline Metabolism | 558      | 04/10/3715             | HMDB04225 |
| 52432 | 2-palmitoleoylglycerol (16:1)*                          | Lipid       | Monoacylglycerol                               |          |                        | HMDB11565 |
| 47118 | 2-palmitoleoyl-GPC* (16:1)*                             | Lipid       | Lysophospholipid                               |          |                        | HMDB10383 |
| 35253 | 2-palmitoyl-GPC* (16:0)*                                | Lipid       | Lysophospholipid                               | 15061532 |                        | HMDB61702 |
| 43400 | 2-piperidinone                                          | Xenobiotics | Food Component/Plant                           | 12665    | 675-20-7               | HMDB11749 |
| 41220 | 2-stearoyl-GPE (18:0)*                                  | Lipid       | Lysophospholipid                               |          |                        | HMDB11129 |
| 62924 | 3-(3-amino-3-carboxypropyl)uridine*                     | Nucleotide  | Pyrimidine Metabolism,<br>Uracil containing    | 171198   | 52745-94-5             |           |
| 35635 | 3-(3-hydroxyphenyl)propionate                           | Xenobiotics | Benzoate Metabolism                            | 91       | 621-54-5               | HMDB00375 |
| 32197 | 3-(4-hydroxyphenyl)lactate (HPLA)                       | Amino Acid  | Tyrosine Metabolism                            | 9378     | 6482-98-0              | HMDB00755 |
| 34365 | 3-(cystein-S-yl)acetaminophen*                          | Xenobiotics | Drug - Analgesics,<br>Anesthetics              | 5233914  |                        |           |
| 62567 | 3-(methylthio)acetaminophen sulfate*                    | Xenobiotics | Drug - Analgesics,<br>Anesthetics              |          |                        |           |
| 45721 | 3-(N-acetyl-L-cystein-S-yl) acetaminophen               | Xenobiotics | Drug - Analgesics,<br>Anesthetics              | 83967    | 52372-86-8             |           |
| 53026 | 3,4-methyleneheptanoate                                 | Xenobiotics | Food Component/Plant                           |          |                        |           |
| 52929 | 3,4-methyleneheptanoylcarnitine                         | Lipid       | Fatty Acid<br>Metabolism(Acyl<br>Carnitine)    |          |                        |           |
| 48693 | 3-acetylphenol sulfate                                  | Xenobiotics | Chemical                                       |          |                        |           |
| 62853 | 3-amino-2-piperidone                                    | Amino Acid  | Urea cycle; Arginine and<br>Proline Metabolism | 5200225  | 1892-22-4              | HMDB00323 |
| 1566  | 3-aminoisobutyrate                                      | Nucleotide  | Pyrimidine Metabolism,<br>Thymine containing   | 64956    | 10569-72-9;214139-20-5 | HMDB03911 |
| 36803 | 3beta,7alpha-dihydroxy-5-cholestenoate                  | Lipid       | Sterol                                         | 3081084  | 115538-84-6            |           |
| 54805 | 3beta-hydroxy-5-cholestenoate                           | Lipid       | Sterol                                         | 165511   | 6561-58-6              |           |
| 43507 | 3b-hydroxy-5-cholenoic acid                             | Lipid       | Secondary Bile Acid<br>Metabolism              | 92997    | 5255-17-4              | HMDB00308 |
| 61871 | 3-carboxy-4-methyl-5-pentyl-2-furanpropionate (3-CMPFP) | Lipid       | Fatty Acid, Dicarboxylate                      | 194501   |                        |           |
| 31787 | 3-carboxy-4-methyl-5-propyl-2-furanpropanoate (CMPF)    | Lipid       | Fatty Acid, Dicarboxylate                      | 123979   | 86879-39-2             | HMDB61112 |
| 62796 | 3-ethylcatechol sulfate (1)                             | Xenobiotics | Food Component/Plant                           |          |                        |           |
| 36848 | 3-ethylphenylsulfate                                    | Xenobiotics | Benzoate Metabolism                            |          |                        | HMDB62721 |
| 62863 | 3-formylindole                                          | Xenobiotics | Food Component/Plant                           | 10256    |                        | HMDB29737 |

|       |                               |             |                                           |          |                      |           |
|-------|-------------------------------|-------------|-------------------------------------------|----------|----------------------|-----------|
| 32397 | 3-hydroxy-2-ethylpropionate   | Amino Acid  | Leucine, Isoleucine and Valine Metabolism | 188979   | 4374-62-3            | HMDB00396 |
| 531   | 3-hydroxy-3-methylglutarate   | Lipid       | Mevalonate Metabolism                     | 1662     | 503-49-1             | HMDB00355 |
| 542   | 3-hydroxybutyrate (BHBA)      | Lipid       | Ketone Bodies                             | 441      | 625-72-9             | HMDB00357 |
| 62064 | 3-hydroxybutyroylglycine      | Lipid       | Fatty Acid Metabolism(Acyl Glycine)       |          |                      |           |
| 43264 | 3-hydroxybutyrylcarnitine (1) | Lipid       | Fatty Acid Metabolism(Acyl Carnitine)     | 53481617 |                      | HMDB13127 |
| 52984 | 3-hydroxybutyrylcarnitine (2) | Lipid       | Fatty Acid Metabolism(Acyl Carnitine)     |          |                      | HMDB13127 |
| 22053 | 3-hydroxydecanoate            | Lipid       | Fatty Acid, Monohydroxy                   | 26612    | 5561-87-5            | HMDB02203 |
| 62915 | 3-hydroxydodecanedioate*      | Lipid       | Fatty Acid, Dicarboxylate                 | 16663321 | 34574-69-1           | HMDB00413 |
| 53230 | 3-hydroxyhexanoate            | Lipid       | Fatty Acid, Monohydroxy                   | 151492   | 10191-24-9           |           |
| 39600 | 3-hydroxyhippurate            | Xenobiotics | Benzoate Metabolism                       | 450268   | 1637-75-8            | HMDB06116 |
| 1549  | 3-hydroxyisobutyrate          | Amino Acid  | Leucine, Isoleucine and Valine Metabolism | 87       | 2068-83-9            | HMDB00336 |
| 32457 | 3-hydroxylaurate              | Lipid       | Fatty Acid, Monohydroxy                   | 94216    | 53941-38-1           | HMDB00387 |
| 22001 | 3-hydroxyoctanoate            | Lipid       | Fatty Acid, Monohydroxy                   | 26613    | 88930-08-9           | HMDB01954 |
| 61840 | 3-hydroxyoleoylcarnitine      | Lipid       | Fatty Acid Metabolism(Acyl Carnitine)     |          |                      |           |
| 61839 | 3-hydroxypalmitoylcarnitine   | Lipid       | Fatty Acid Metabolism(Acyl Carnitine)     |          |                      |           |
| 48448 | 3-hydroxypyridine sulfate     | Xenobiotics | Chemical                                  |          | 1955-23-3            |           |
| 31943 | 3-hydroxysebacate             | Lipid       | Fatty Acid, Monohydroxy                   | 3017884  | 73141-46-5           | HMDB00350 |
| 62062 | 3-hydroxystachydrine*         | Xenobiotics | Food Component/Plant                      | 442640   |                      |           |
| 27672 | 3-indoxyl sulfate             | Amino Acid  | Tryptophan Metabolism                     | 10258    | 2642-37-7            | HMDB00682 |
| 48763 | 3-methoxycatechol sulfate (1) | Xenobiotics | Benzoate Metabolism                       |          |                      |           |
| 48752 | 3-methoxycatechol sulfate (2) | Xenobiotics | Benzoate Metabolism                       |          |                      |           |
| 44618 | 3-methoxytyramine sulfate     | Amino Acid  | Tyrosine Metabolism                       |          |                      |           |
| 12017 | 3-methoxytyrosine             | Amino Acid  | Tyrosine Metabolism                       | 1670     | 300-48-1             | HMDB01434 |
| 46165 | 3-methyl catechol sulfate (1) | Xenobiotics | Benzoate Metabolism                       |          |                      |           |
| 44526 | 3-methyl-2-oxobutyrate        | Amino Acid  | Leucine, Isoleucine and Valine Metabolism | 49       | 3715-29-5            | HMDB00019 |
| 15676 | 3-methyl-2-oxovalerate        | Amino Acid  | Leucine, Isoleucine and Valine Metabolism | 47       | 1460-34-0;51829-07-3 | HMDB03736 |
| 36749 | 3-methyladipate               | Lipid       | Fatty Acid, Dicarboxylate                 | 12292    | 03/01/3058           | HMDB00555 |
| 57747 | 3-methylglutaconate           | Amino Acid  | Leucine, Isoleucine and Valine Metabolism | 1551553  | 5746-90-7            | HMDB00522 |

|       |                                     |              |                                                      |         |                       |           |
|-------|-------------------------------------|--------------|------------------------------------------------------|---------|-----------------------|-----------|
| 46548 | 3-methylglutarylcarntine (2)        | Amino Acid   | Leucine, Isoleucine and Valine Metabolism            | 128145  |                       | HMDB00552 |
| 15677 | 3-methylhistidine                   | Amino Acid   | Histidine Metabolism                                 | 64969   | 368-16-1              | HMDB00479 |
| 32445 | 3-methylxanthine                    | Xenobiotics  | Xanthine Metabolism                                  | 70639   | 1076-22-8             | HMDB01886 |
| 15749 | 3-phenylpropionate (hydrocinnamate) | Xenobiotics  | Benzoate Metabolism                                  | 107     | 501-52-0              | HMDB00764 |
| 1414  | 3-phosphoglycerate                  | Carbohydrate | Glycolysis, Gluconeogenesis, and Pyruvate Metabolism | 724     | 80731-10-8            | HMDB00807 |
| 3155  | 3-ureidopropionate                  | Nucleotide   | Pyrimidine Metabolism, Uracil containing             | 111     | 462-88-4              | HMDB00026 |
| 1558  | 4-acetamidobutanoate                | Amino Acid   | Polyamine Metabolism                                 | 18189   | 3025-96-5             | HMDB03681 |
| 12032 | 4-acetamidophenol                   | Xenobiotics  | Drug - Analgesics, Anesthetics                       | 1983    | 103-90-2              | HMDB01859 |
| 15736 | 4-acetamidophenylglucuronide        | Xenobiotics  | Drug - Analgesics, Anesthetics                       | 83944   | 120595-80-4           | HMDB10316 |
| 37475 | 4-acetaminophen sulfate             | Xenobiotics  | Drug - Analgesics, Anesthetics                       | 83939   | 10066-90-7;32113-41-0 | HMDB59911 |
| 44620 | 4-acetylphenyl sulfate              | Xenobiotics  | Benzoate Metabolism                                  | 4684006 |                       |           |
| 37181 | 4-allylphenol sulfate               | Xenobiotics  | Food Component/Plant                                 |         |                       |           |
| 38125 | 4-cholesten-3-one                   | Lipid        | Sterol                                               | 91477   | 601-57-0              | HMDB00921 |
| 36099 | 4-ethylphenyl sulfate               | Xenobiotics  | Benzoate Metabolism                                  |         | 123-07-9              | HMDB62551 |
| 15681 | 4-guanidinobutanoate                | Amino Acid   | Guanidino and Acetamido Metabolism                   | 500     | 463-003;463-00-3      | HMDB03464 |
| 40062 | 4-hydroxy-2-oxoglutaric acid        | Lipid        | Fatty Acid, Dicarboxylate                            | 599     | 1187-99-1             | HMDB02070 |
| 48441 | 4-hydroxychlorothalonil             | Xenobiotics  | Chemical                                             | 34217   | 28343-61-5            |           |
| 40499 | 4-hydroxyglutamate                  | Amino Acid   | Glutamate Metabolism                                 | 439902  | 2485-33-8             | HMDB01344 |
| 35527 | 4-hydroxyhippurate                  | Xenobiotics  | Benzoate Metabolism                                  | 151012  | 2482-25-9             | HMDB13678 |
| 541   | 4-hydroxyphenylacetate              | Amino Acid   | Phenylalanine Metabolism                             | 127     | 156-38-7              | HMDB00020 |
| 55017 | 4-hydroxyphenylacetylglutamine      | Peptide      | Acetylated Peptides                                  |         |                       |           |
| 1669  | 4-hydroxyphenylpyruvate             | Amino Acid   | Tyrosine Metabolism                                  | 979     | 156-39-8              | HMDB00707 |
| 48457 | 4-methoxyphenol sulfate             | Amino Acid   | Tyrosine Metabolism                                  |         | 3233-60-1             |           |
| 22116 | 4-methyl-2-oxopentanoate            | Amino Acid   | Leucine, Isoleucine and Valine Metabolism            | 70      | 816-66-0              | HMDB00695 |
| 46146 | 4-methylcatechol sulfate            | Xenobiotics  | Benzoate Metabolism                                  |         |                       |           |
| 48418 | 4-methylguaiacol sulfate            | Xenobiotics  | Benzoate Metabolism                                  |         | 756760-43-7           |           |
| 48442 | 4-vinylguaiacol sulfate             | Xenobiotics  | Food Component/Plant                                 |         |                       |           |
| 36098 | 4-vinylphenol sulfate               | Xenobiotics  | Benzoate Metabolism                                  | 6426766 | 2628-17-3             | HMDB62775 |
| 43582 | 5-(galactosylhydroxy)-L-lysine      | Amino Acid   | Lysine Metabolism                                    |         | 32448-36-5            |           |
| 1418  | 5,6-dihydrothymine                  | Nucleotide   | Pyrimidine Metabolism, Thymine containing            | 93556   | 696-04-8              | HMDB00079 |

|       |                                                     |             |                                             |         |              |           |
|-------|-----------------------------------------------------|-------------|---------------------------------------------|---------|--------------|-----------|
| 1559  | 5,6-dihydrouracil                                   | Nucleotide  | Pyrimidine Metabolism,<br>Uracil containing | 649     | 504-07-4     | HMDB00076 |
| 61833 | 5,6-dihydrouridine                                  | Nucleotide  | Pyrimidine Metabolism,<br>Uracil containing | 94312   | 04/05/5627   |           |
| 34424 | 5-acetylamino-6-amino-3-methyluracil                | Xenobiotics | Xanthine Metabolism                         | 88299   | 1196153-01-1 | HMDB04400 |
| 34401 | 5-acetylamino-6-formylamino-3-methyluracil          | Xenobiotics | Xanthine Metabolism                         | 108214  | 85438-96-6   | HMDB11105 |
| 37184 | 5alpha-androstan-3alpha,17beta-diol disulfate       | Lipid       | Androgenic Steroids                         |         |              |           |
| 37186 | 5alpha-androstan-3alpha,17beta-diol monosulfate (1) | Lipid       | Androgenic Steroids                         |         |              |           |
| 37185 | 5alpha-androstan-3alpha,17beta-diol monosulfate (2) | Lipid       | Androgenic Steroids                         |         |              |           |
| 37187 | 5alpha-androstan-3beta,17alpha-diol disulfate       | Lipid       | Androgenic Steroids                         |         |              |           |
| 37190 | 5alpha-androstan-3beta,17beta-diol disulfate        | Lipid       | Androgenic Steroids                         | 242332  | 571-20-0     | HMDB00493 |
| 37192 | 5alpha-androstan-3beta,17beta-diol monosulfate (2)  | Lipid       | Androgenic Steroids                         |         |              |           |
| 37198 | 5alpha-pregnan-3beta,20alpha-diol disulfate         | Lipid       | Progestin Steroids                          |         |              |           |
| 37200 | 5alpha-pregnan-3beta,20alpha-diol monosulfate (2)   | Lipid       | Progestin Steroids                          |         |              |           |
| 37196 | 5alpha-pregnan-3beta,20beta-diol monosulfate (1)    | Lipid       | Progestin Steroids                          |         |              |           |
| 46172 | 5alpha-pregnan-diol disulfate                       | Lipid       | Progestin Steroids                          | 5127902 |              |           |
| 33968 | 5-dodecenoate (12:1n7)                              | Lipid       | Medium Chain Fatty Acid                     | 5312378 | 2430-94-6    | HMDB00529 |
| 61769 | 5-dodecenoylcarnitine (C12:1)                       | Lipid       | Fatty Acid<br>Metabolism(Acyl<br>Carnitine) |         |              | HMDB13326 |
| 46297 | 5-HEPE                                              | Lipid       | Eicosanoid                                  | 6439678 | 83952-40-3   | HMDB05081 |
| 37372 | 5-HETE                                              | Lipid       | Eicosanoid                                  | 5280733 | 73307-52-5   | HMDB11134 |
| 31938 | 5-hydroxyhexanoate                                  | Lipid       | Fatty Acid, Monohydroxy                     | 170748  | 44843-89-2   | HMDB00525 |
| 15685 | 5-hydroxylysine                                     | Amino Acid  | Lysine Metabolism                           | 1029    | 13204-98-3   | HMDB00450 |
| 1419  | 5-methylthioadenosine (MTA)                         | Amino Acid  | Polyamine Metabolism                        | 439176  | 2457-80-9    | HMDB01173 |
| 35136 | 5-methyluridine (ribothymidine)                     | Nucleotide  | Pyrimidine Metabolism,<br>Uracil containing | 445408  | 1463-10-1    | HMDB00884 |
| 1494  | 5-oxoproline                                        | Amino Acid  | Glutathione Metabolism                      | 7405    | 98-79-3      | HMDB00267 |
| 62503 | 6-bromotryptophan                                   | Amino Acid  | Tryptophan Metabolism                       |         |              |           |
| 48698 | 6-hydroxyindole sulfate                             | Xenobiotics | Chemical                                    |         |              |           |
| 43231 | 6-oxopiperidine-2-carboxylate                       | Amino Acid  | Lysine Metabolism                           | 3014237 | 34622-39-4   | HMDB61705 |
| 36776 | 7-HOCA                                              | Lipid       | Sterol                                      | 3081085 | 115538-85-7  | HMDB12458 |
| 35114 | 7-methylguanine                                     | Nucleotide  | Purine Metabolism,<br>Guanine containing    | 11361   | 578-76-7     | HMDB00897 |
| 21239 | 8-hydroxyoctanoate                                  | Lipid       | Fatty Acid, Monohydroxy                     | 69820   | 764-89-6     | HMDB61914 |
| 38399 | 9,10-DiHOME                                         | Lipid       | Fatty Acid, Dihydroxy                       | 9966640 | 263399-34-4  | HMDB04704 |
| 47120 | 9-hydroxystearate                                   | Lipid       | Fatty Acid, Monohydroxy                     | 9570127 | 25498-28-6   | HMDB61661 |

|       |                                                  |                        |                                                            |          |                              |           |
|-------|--------------------------------------------------|------------------------|------------------------------------------------------------|----------|------------------------------|-----------|
| 48569 | acesulfame                                       | Xenobiotics            | Food Component/Plant                                       | 36573    | 55589-62-3                   | HMDB33585 |
| 32198 | acetylcarnitine (C2)                             | Lipid                  | Fatty Acid<br>Metabolism(Acyl<br>Carnitine)                | 1        | 5080-50-2                    | HMDB00201 |
| 43258 | acisoga                                          | Amino Acid             | Polyamine Metabolism                                       | 129397   | 106692-36-8                  |           |
| 46173 | aconitate [cis or trans]                         | Energy                 | TCA Cycle                                                  |          |                              |           |
| 554   | adenine                                          | Nucleotide             | Purine Metabolism,<br>Adenine containing                   | 190      | 73-24-5                      | HMDB00034 |
| 32342 | AMP                                              | Nucleotide             | Purine Metabolism,<br>Adenine containing                   | 6083     | 149022-20-8                  | HMDB00045 |
| 52988 | adipoylcarnitine (C6-DC)                         | Lipid                  | Fatty Acid<br>Metabolism(Acyl<br>Carnitine)                | 71296139 |                              | HMDB61677 |
| 32980 | adrenate (22:4n6)                                | Lipid                  | Polyunsaturated Fatty<br>Acid (n3 and n6)                  | 5497181  | 2091-25-0                    | HMDB02226 |
| 57528 | adrenoylcarnitine (C22:4)*                       | Lipid                  | Fatty Acid<br>Metabolism(Acyl<br>Carnitine)                |          |                              |           |
| 1126  | alanine                                          | Amino Acid             | Alanine and Aspartate<br>Metabolism                        | 5950     | 56-41-7                      | HMDB00161 |
| 1107  | allantoin                                        | Nucleotide             | Purine Metabolism,<br>(Hypo)Xanthine/Inosine<br>containing | 204      | 97-59-6                      | HMDB00462 |
| 41494 | alliin                                           | Xenobiotics            | Food Component/Plant                                       | 87310    | 556-27-4                     | HMDB33592 |
| 43534 | allopurinol                                      | Xenobiotics            | Drug - Metabolic                                           | 2094     | 315-30-0                     |           |
| 38321 | allopurinol riboside                             | Xenobiotics            | Drug - Metabolic                                           |          | 16220-07-8                   |           |
| 37073 | alpha-hydroxycaproate                            | Lipid                  | Fatty Acid, Monohydroxy                                    | 99824    | 6064-63-7                    | HMDB01624 |
| 22132 | alpha-hydroxyisocaproate                         | Amino Acid             | Leucine, Isoleucine and<br>Valine Metabolism               | 83697    | 10303-64-7                   | HMDB00746 |
| 46537 | alpha-hydroxyisovalerate                         | Amino Acid             | Leucine, Isoleucine and<br>Valine Metabolism               | 99823    | 600-37-3                     | HMDB00407 |
| 54738 | alpha-hydroxymetoprolol                          | Xenobiotics            | Drug - Cardiovascular                                      | 114962   | 56392-16-6                   | HMDB60994 |
| 4968  | alpha-ketobutyrate                               | Amino Acid             | Methionine, Cysteine,<br>SAM and Taurine<br>Metabolism     | 58       | 600-18-0                     | HMDB00005 |
| 62101 | alpha-ketoglutaramate*                           | Amino Acid             | Glutamate Metabolism                                       |          | 18465-19-5                   |           |
| 528   | alpha-ketoglutarate                              | Energy                 | TCA Cycle                                                  | 51       | 305-72-6;328-50-7;22202-68-2 | HMDB00208 |
| 1561  | alpha-tocopherol                                 | Cofactors and Vitamins | Tocopherol Metabolism                                      | 14985    | 59-02-9;10191-41-0           | HMDB01893 |
| 52948 | amoxicillin                                      | Xenobiotics            | Drug - Antibiotic                                          | 2171     | 26787-78-0                   | HMDB15193 |
| 32827 | andro steroid monosulfate C19H28O6S (1)*         | Lipid                  | Androgenic Steroids                                        |          |                              | HMDB02759 |
| 37207 | androstenediol (3alpha, 17alpha) monosulfate (2) | Lipid                  | Androgenic Steroids                                        |          |                              |           |
| 37209 | androstenediol (3alpha, 17alpha) monosulfate (3) | Lipid                  | Androgenic Steroids                                        |          |                              |           |
| 37202 | androstenediol (3beta,17beta) disulfate (1)      | Lipid                  | Androgenic Steroids                                        | 87120982 |                              | HMDB03818 |

|       |                                               |                        |                                             |          |                  |           |
|-------|-----------------------------------------------|------------------------|---------------------------------------------|----------|------------------|-----------|
| 37203 | androstenediol (3beta,17beta) disulfate (2)   | Lipid                  | Androgenic Steroids                         | 87120982 |                  | HMDB03818 |
| 37211 | androstenediol (3beta,17beta) monosulfate (1) | Lipid                  | Androgenic Steroids                         | 13847309 | 521-17-5         | HMDB03818 |
| 37210 | androstenediol (3beta,17beta) monosulfate (2) | Lipid                  | Androgenic Steroids                         |          |                  |           |
| 61846 | androsterone glucuronide                      | Lipid                  | Androgenic Steroids                         | 114833   | 1852-43-3        | HMDB02829 |
| 31591 | androsterone sulfate                          | Lipid                  | Androgenic Steroids                         | 159663   | 2479-86-9        | HMDB02759 |
| 575   | arabinose                                     | Carbohydrate           | Pentose Metabolism                          | 66308    | 28697-53-2       | HMDB00646 |
| 48885 | arabitol/xylitol                              | Carbohydrate           | Pentose Metabolism                          | 6912     |                  |           |
| 48255 | arabonate/xylonate                            | Carbohydrate           | Pentose Metabolism                          |          |                  |           |
| 1118  | arachidate (20:0)                             | Lipid                  | Long Chain Fatty Acid                       | 10467    | 506-30-9         | HMDB02212 |
| 1110  | arachidonate (20:4n6)                         | Lipid                  | Polyunsaturated Fatty Acid (n3 and n6)      | 444899   | 506-32-1         | HMDB01043 |
| 57518 | arachidonoylcarnitine (C20:4)                 | Lipid                  | Fatty Acid Metabolism(Acyl Carnitine)       |          |                  |           |
| 53261 | arachidonoylcholine                           | Lipid                  | Fatty Acid Metabolism (Acyl Choline)        |          |                  |           |
| 57513 | arachidoylcarnitine (C20)*                    | Lipid                  | Fatty Acid Metabolism(Acyl Carnitine)       |          |                  | HMDB06460 |
| 57461 | argininate*                                   | Amino Acid             | Urea cycle; Arginine and Proline Metabolism | 160437   | 157-07-3         | HMDB03148 |
| 1638  | arginine                                      | Amino Acid             | Urea cycle; Arginine and Proline Metabolism | 232      | 1119-34-2        | HMDB00517 |
| 512   | asparagine                                    | Amino Acid             | Alanine and Aspartate Metabolism            | 6267     | 70-47-3          | HMDB00168 |
| 443   | aspartate                                     | Amino Acid             | Alanine and Aspartate Metabolism            | 5960     | 56-84-8          | HMDB00191 |
| 18362 | azelate (nonanedioate; C9)                    | Lipid                  | Fatty Acid, Dicarboxylate                   | 2266     | 123-99-9         | HMDB00784 |
| 57331 | behenoyl dihydrosphingomyelin (d18:0/22:0)*   | Lipid                  | Dihydrosphingomyelins                       |          |                  | HMDB12091 |
| 48492 | behenoyl sphingomyelin (d18:1/22:0)*          | Lipid                  | Sphingomyelins                              |          |                  | HMDB12103 |
| 57514 | behenoylcarnitine (C22)*                      | Lipid                  | Fatty Acid Metabolism(Acyl Carnitine)       |          |                  |           |
| 15778 | benzoate                                      | Xenobiotics            | Benzoate Metabolism                         | 243      | 65-85-0          | HMDB01870 |
| 55    | beta-alanine                                  | Nucleotide             | Pyrimidine Metabolism, Uracil containing    | 239      | 56-41-7;107-95-9 | HMDB00056 |
| 54923 | beta-citrylglutamate                          | Amino Acid             | Glutamate Metabolism                        | 72715786 | 73590-26-8       |           |
| 57591 | beta-cryptoxanthin                            | Cofactors and Vitamins | Vitamin A Metabolism                        | 6384256  | 472-70-8         | HMDB33844 |
| 12129 | beta-hydroxyisovalerate                       | Amino Acid             | Leucine, Isoleucine and Valine Metabolism   | 69362    | 625-08-1         | HMDB00754 |
| 3141  | betaine                                       | Amino Acid             | Glycine, Serine and Threonine Metabolism    | 247      | 107-43-7         | HMDB00043 |
| 27414 | beta-sitosterol                               | Lipid                  | Sterol                                      | 222284   | 83-46-5          | HMDB00852 |



|       |                                                |                        |                                              |          |                       |           |
|-------|------------------------------------------------|------------------------|----------------------------------------------|----------|-----------------------|-----------|
| 32586 | bilirubin (E,E)*                               | Cofactors and Vitamins | Hemoglobin and Porphyrin Metabolism          | 5315454  | 114-25-0              |           |
| 47886 | bilirubin (E,Z or Z,E)*                        | Cofactors and Vitamins | Hemoglobin and Porphyrin Metabolism          | 5799469  |                       | HMDB00488 |
| 43807 | bilirubin                                      | Cofactors and Vitamins | Hemoglobin and Porphyrin Metabolism          | 5280352  | 635-65-4              | HMDB00054 |
| 2137  | biliverdin                                     | Cofactors and Vitamins | Hemoglobin and Porphyrin Metabolism          | 5353439  | 55482-27-4;55482-27-4 | HMDB01008 |
| 22154 | bradykinin                                     | Peptide                | Polypeptide                                  | 439201   | 58-82-2               | HMDB04246 |
| 34420 | bradykinin, des-arg(9)                         | Peptide                | Polypeptide                                  | 105044   | 15958-92-6            | HMDB04246 |
| 32412 | butyrylcarnitine (C4)                          | Lipid                  | Fatty Acid Metabolism (also BCAA Metabolism) | 439829   | 25576-40-3            | HMDB02013 |
| 53254 | caffeic acid sulfate                           | Xenobiotics            | Food Component/Plant                         |          |                       | HMDB41708 |
| 569   | caffeine                                       | Xenobiotics            | Xanthine Metabolism                          | 2519     | 1958/8/2              | HMDB01847 |
| 33997 | campesterol                                    | Lipid                  | Sterol                                       | 173183   | 474-62-4              | HMDB02869 |
| 1642  | caprate (10:0)                                 | Lipid                  | Medium Chain Fatty Acid                      | 2969     | 334-48-5              | HMDB00511 |
| 32489 | caproate (6:0)                                 | Lipid                  | Medium Chain Fatty Acid                      | 8892     | 142-62-1              | HMDB00535 |
| 32492 | caprylate (8:0)                                | Lipid                  | Medium Chain Fatty Acid                      | 379      | 124-07-2              | HMDB00482 |
| 40007 | carboxyethyl-GABA                              | Amino Acid             | Glutamate Metabolism                         | 2572     | 02/03/4386            | HMDB02201 |
| 43333 | carboxyibuprofen                               | Xenobiotics            | Drug - Analgesics, Anesthetics               | 10444113 | 15935-54-3            | HMDB60564 |
| 62067 | carboxyibuprofen glucuronide*                  | Xenobiotics            | Drug - Analgesics, Anesthetics               |          |                       | HMDB60564 |
| 15500 | carnitine                                      | Lipid                  | Carnitine Metabolism                         | 10917    | 461-05-2              | HMDB00062 |
| 57635 | carotene diol (1)                              | Cofactors and Vitamins | Vitamin A Metabolism                         |          |                       |           |
| 57636 | carotene diol (2)                              | Cofactors and Vitamins | Vitamin A Metabolism                         |          |                       |           |
| 57637 | carotene diol (3)                              | Cofactors and Vitamins | Vitamin A Metabolism                         |          |                       |           |
| 35320 | catechol sulfate                               | Xenobiotics            | Benzoate Metabolism                          | 3083879  | 4918-96-1             | HMDB59724 |
| 57684 | cefoperazone                                   | Xenobiotics            | Drug - Antibiotic                            | 7048632  | 62893-20-3            |           |
| 57437 | ceramide (d16:1/24:1, d18:1/22:1)*             | Lipid                  | Ceramides                                    |          |                       |           |
| 57434 | ceramide (d18:1/17:0, d17:1/18:0)*             | Lipid                  | Ceramides                                    |          |                       |           |
| 57440 | ceramide (d18:1/20:0, d16:1/22:0, d20:1/18:0)* | Lipid                  | Ceramides                                    |          |                       |           |
| 57443 | ceramide (d18:2/24:1, d18:1/24:2)*             | Lipid                  | Ceramides                                    |          |                       |           |
| 57516 | cerotoylcarnitine (C26)*                       | Lipid                  | Fatty Acid Metabolism(Acyl Carnitine)        |          |                       | HMDB06347 |
| 54745 | cetirizine                                     | Xenobiotics            | Drug - Respiratory                           | 2678     | 83881-51-0            | HMDB05032 |
| 48782 | C-glycosyltryptophan                           | Amino Acid             | Tryptophan Metabolism                        | 10981970 | 180509-18-6           |           |
| 1563  | chenodeoxycholate                              | Lipid                  | Primary Bile Acid Metabolism                 | 10133    | 474-24-9;474-25-9     | HMDB00518 |

|       |                                 |             |                                                  |          |                 |           |
|-------|---------------------------------|-------------|--------------------------------------------------|----------|-----------------|-----------|
| 22842 | cholate                         | Lipid       | Primary Bile Acid Metabolism                     | 221493   | 81-25-4         | HMDB00619 |
| 63    | cholesterol                     | Lipid       | Sterol                                           | 11025495 | 57-88-5         | HMDB00067 |
| 15506 | choline                         | Lipid       | Phospholipid Metabolism                          | 305      | 67-48-1         | HMDB00097 |
| 34396 | phosphocholine                  | Lipid       | Phospholipid Metabolism                          | 1014     | 72556-74-2      | HMDB01565 |
| 42592 | cimetidine                      | Xenobiotics | Drug - Gastrointestinal                          |          | 51481-61-9      |           |
| 38637 | cinnamoylglycine                | Xenobiotics | Food Component/Plant                             | 709625   | 16534-24-0      | HMDB11621 |
| 62873 | cis-4-decenoate (10:1n6)*       | Lipid       | Medium Chain Fatty Acid                          | 5312351  | 505-90-8        |           |
| 38178 | cis-4-decenoylcarnitine (C10:1) | Lipid       | Fatty Acid Metabolism(Acyl Carnitine)            |          | 98930-66-6      |           |
| 22158 | citramalate                     | Amino Acid  | Glutamate Metabolism                             | 1081     | 08/10/6236      | HMDB00426 |
| 1564  | citrate                         | Energy      | TCA Cycle                                        | 311      | 77-92-9         | HMDB00094 |
| 2132  | citrulline                      | Amino Acid  | Urea cycle; Arginine and Proline Metabolism      | 9750     | 372-75-8        | HMDB00904 |
| 57673 | clindamycin                     | Xenobiotics | Drug - Antibiotic                                | 446598   | 18323-44-9      |           |
| 5983  | corticosterone                  | Lipid       | Corticosteroids                                  | 5753     | 50-22-6         | HMDB01547 |
| 1712  | cortisol                        | Lipid       | Corticosteroids                                  | 5754     | 50-23-7         | HMDB00063 |
| 1769  | cortisone                       | Lipid       | Corticosteroids                                  | 222786   | 1953/6/5        | HMDB02802 |
| 553   | cotinine                        | Xenobiotics | Tobacco Metabolite                               | 854019   | 486-56-6        | HMDB01046 |
| 27718 | creatine                        | Amino Acid  | Creatine Metabolism                              | 586      | 57-00-1         | HMDB00064 |
| 513   | creatinine                      | Amino Acid  | Creatine Metabolism                              | 588      | 60-27-5         | HMDB00562 |
| 18368 | cys-gly, oxidized               | Amino Acid  | Glutathione Metabolism                           | 333293   | 7729-20-6       |           |
| 15705 | cystathionine                   | Amino Acid  | Methionine, Cysteine, SAM and Taurine Metabolism | 439258   | 535-34-2        | HMDB00099 |
| 1868  | cysteine                        | Amino Acid  | Methionine, Cysteine, SAM and Taurine Metabolism | 5862     | 52-90-4;56-89-3 | HMDB00574 |
| 22176 | cysteine s-sulfate              | Amino Acid  | Methionine, Cysteine, SAM and Taurine Metabolism | 115015   | 1637-71-4       | HMDB00731 |
| 37443 | cysteine sulfinic acid          | Amino Acid  | Methionine, Cysteine, SAM and Taurine Metabolism | 109      | 207121-48-0     | HMDB00996 |
| 35159 | cysteine-glutathione disulfide  | Amino Acid  | Glutathione Metabolism                           | 4247235  | 13081-14-6      | HMDB00656 |
| 35637 | cysteinylglycine                | Amino Acid  | Glutathione Metabolism                           | 439498   | 19246-18-5      | HMDB00078 |
| 62103 | cysteinylglycine disulfide*     | Amino Acid  | Glutathione Metabolism                           |          | 70555-24-7      | HMDB00709 |
| 56    | cystine                         | Amino Acid  | Methionine, Cysteine, SAM and Taurine Metabolism | 67678    | 56-89-3         | HMDB00192 |

|       |                                                |                        |                                                |          |             |           |
|-------|------------------------------------------------|------------------------|------------------------------------------------|----------|-------------|-----------|
| 514   | cytidine                                       | Nucleotide             | Pyrimidine Metabolism,<br>Cytidine containing  | 6175     | 65-46-3     | HMDB00089 |
| 48728 | daidzein sulfate (2)                           | Xenobiotics            | Food Component/Plant                           |          |             |           |
| 33941 | decanoylcarnitine (C10)                        | Lipid                  | Fatty Acid<br>Metabolism(Acyl<br>Carnitine)    | 10245190 | 1492-27-9   | HMDB00651 |
| 32425 | dehydroisoandrosterone sulfate (DHEA-S)        | Lipid                  | Androgenic Steroids                            | 12594    | 651-48-9    | HMDB01032 |
| 62286 | delta-CEHC glucuronide*                        | Cofactors and Vitamins | Tocopherol Metabolism                          |          |             |           |
| 62287 | delta-CEHC*                                    | Cofactors and Vitamins | Tocopherol Metabolism                          | 11536125 | 84599-16-6  |           |
| 33418 | delta-tocopherol                               | Cofactors and Vitamins | Tocopherol Metabolism                          | 92094    | 119-13-1    | HMDB02902 |
| 36747 | deoxycarnitine                                 | Lipid                  | Carnitine Metabolism                           | 134      | 6249-56-5   | HMDB01161 |
| 1114  | deoxycholate                                   | Lipid                  | Secondary Bile Acid<br>Metabolism              | 222528   | 83-44-3     | HMDB00626 |
| 46331 | desmethylnaproxen                              | Xenobiotics            | Drug - Analgesics,<br>Anesthetics              | 13393711 | 52079-10-4  | HMDB13989 |
| 46106 | desmethylnaproxen sulfate                      | Xenobiotics            | Drug - Analgesics,<br>Anesthetics              | 184679   |             |           |
| 57668 | dexlansoprazole                                | Xenobiotics            | Drug - Gastrointestinal                        | 9578005  | 138530-94-6 |           |
| 54953 | diacylglycerol (14:0/18:1, 16:0/16:1) [1]*     | Lipid                  | Diacylglycerol                                 |          |             |           |
| 54954 | diacylglycerol (14:0/18:1, 16:0/16:1) [2]*     | Lipid                  | Diacylglycerol                                 |          |             |           |
| 54966 | diacylglycerol (16:1/18:2 [2], 16:0/18:3 [1])* | Lipid                  | Diacylglycerol                                 |          |             |           |
| 52931 | diclofenac                                     | Xenobiotics            | Drug - Analgesics,<br>Anesthetics              |          | 15307-86-5  | HMDB14724 |
| 17805 | dihomolinoleate (20:2n6)                       | Lipid                  | Polyunsaturated Fatty<br>Acid (n3 and n6)      | 6439848  | 2091-39-6   | HMDB05060 |
| 35718 | dihomolinolenate (20:3n3 or 3n6)               | Lipid                  | Polyunsaturated Fatty<br>Acid (n3 and n6)      | 5280581  | 17046-59-2  | HMDB02925 |
| 57521 | dihomo-linolenoylcarnitine (C20:3n3 or 6)*     | Lipid                  | Fatty Acid<br>Metabolism(Acyl<br>Carnitine)    |          |             |           |
| 53262 | dihomo-linolenoyl-choline                      | Lipid                  | Fatty Acid Metabolism<br>(Acyl Choline)        |          |             |           |
| 57520 | dihomo-linoleoylcarnitine (C20:2)*             | Lipid                  | Fatty Acid<br>Metabolism(Acyl<br>Carnitine)    |          |             |           |
| 62524 | dihydrocaffeate sulfate (2)                    | Xenobiotics            | Food Component/Plant                           |          |             |           |
| 40481 | dihydroferulate                                | Xenobiotics            | Food Component/Plant                           | 14340    | 1135-23-5   |           |
| 62857 | dihydroferulic acid sulfate                    | Xenobiotics            | Food Component/Plant                           | 187489   |             | HMDB41724 |
| 601   | dihydroorotate                                 | Nucleotide             | Pyrimidine Metabolism,<br>Orotate containing   | 648      | 155-54-4    | HMDB03349 |
| 36808 | dimethylarginine (ADMA + SDMA)                 | Amino Acid             | Urea cycle; Arginine and<br>Proline Metabolism | 123831   | 102783-24-4 | HMDB01539 |
| 5086  | dimethylglycine                                | Amino Acid             | Glycine, Serine and<br>Threonine Metabolism    | 673      | 1118-68-9   | HMDB00092 |

|       |                                      |             |                                        |         |                      |           |
|-------|--------------------------------------|-------------|----------------------------------------|---------|----------------------|-----------|
| 32415 | docosadienoate (22:2n6)              | Lipid       | Polyunsaturated Fatty Acid (n3 and n6) | 5282807 | 7370-49-2            | HMDB61714 |
| 39837 | docosadioate (C22-DC)                | Lipid       | Fatty Acid, Dicarboxylate              | 244872  | 505-56-6             |           |
| 44675 | docosahexaenoate (DHA; 22:6n3)       | Lipid       | Polyunsaturated Fatty Acid (n3 and n6) | 445580  | 6217-54-5            | HMDB02183 |
| 57523 | docosahexaenoylcarnitine (C22:6)*    | Lipid       | Fatty Acid Metabolism(Acyl Carnitine)  |         |                      |           |
| 53263 | docosahexaenoylcholine               | Lipid       | Fatty Acid Metabolism (Acyl Choline)   |         |                      |           |
| 32504 | docosapentaenoate (DPA; 22:5n3)      | Lipid       | Polyunsaturated Fatty Acid (n3 and n6) | 6441454 | 2234-74-4            | HMDB06528 |
| 37478 | docosapentaenoate (n6 DPA; 22:5n6)   | Lipid       | Polyunsaturated Fatty Acid (n3 and n6) | 6441454 | 25182-74-5           | HMDB01976 |
| 57529 | docosapentaenoylcarnitine (C22:5n3)* | Lipid       | Fatty Acid Metabolism(Acyl Carnitine)  |         |                      |           |
| 32417 | docosatrienoate (22:3n3)             | Lipid       | Polyunsaturated Fatty Acid (n3 and n6) | 5312556 | 59708-86-0           | HMDB02823 |
| 57467 | docosatrienoate (22:3n6)*            | Lipid       | Polyunsaturated Fatty Acid (n3 and n6) |         |                      |           |
| 62276 | dodecadienoate (12:2)*               | Lipid       | Fatty Acid, Dicarboxylate              |         |                      |           |
| 32388 | dodecanedioate (C12)                 | Lipid       | Fatty Acid, Dicarboxylate              | 12736   | 693-23-2             | HMDB00623 |
| 61864 | dodecenedioate (C12:1-DC)*           | Lipid       | Fatty Acid, Dicarboxylate              |         |                      |           |
| 48407 | dopamine 3-O-sulfate                 | Amino Acid  | Tyrosine Metabolism                    | 122136  |                      | HMDB06275 |
| 39273 | doxycycline                          | Xenobiotics | Drug - Antibiotic                      |         | 24390-14-5           |           |
| 35651 | ectoine                              | Xenobiotics | Chemical                               | 126041  | 96702-03-3           |           |
| 22163 | EDTA                                 | Xenobiotics | Chemical                               | 6049    | 60-00-4              | HMDB15109 |
| 39831 | eicosanedioate (C20-DC)              | Lipid       | Fatty Acid, Dicarboxylate              | 75502   | 2424-92-2            |           |
| 18467 | eicosapentaenoate (EPA; 20:5n3)      | Lipid       | Polyunsaturated Fatty Acid (n3 and n6) | 446284  | 10-2005-9;10417-94-4 | HMDB01999 |
| 62445 | eicosenamide (20:1)*                 | Lipid       | Fatty Acid, Amide                      | 5365374 |                      |           |
| 62923 | eicosenedioate (C20:1-DC)*           | Lipid       | Fatty Acid, Dicarboxylate              |         |                      |           |
| 33587 | eicosenoate (20:1n9 or 1n11)         | Lipid       | Long Chain Fatty Acid                  | 5282768 |                      | HMDB02231 |
| 57519 | eicosenoylcarnitine (C20:1)*         | Lipid       | Fatty Acid Metabolism(Acyl Carnitine)  |         |                      |           |
| 33973 | epiandrosterone sulfate              | Lipid       | Androgenic Steroids                    | 9929317 | 22229-22-7           |           |
| 40478 | equol sulfate                        | Xenobiotics | Food Component/Plant                   |         |                      |           |
| 37459 | ergothioneine                        | Xenobiotics | Food Component/Plant                   | 3032311 | 58511-63-0           | HMDB03045 |
| 1552  | erucate (22:1n9)                     | Lipid       | Long Chain Fatty Acid                  | 5281116 | 112-86-7             | HMDB02068 |
| 57525 | erucoylcarnitine (C22:1)*            | Lipid       | Fatty Acid Metabolism(Acyl)            |         |                      |           |

|       |                                |                        | Carnitine)                                 |         |                     |           |
|-------|--------------------------------|------------------------|--------------------------------------------|---------|---------------------|-----------|
| 20699 | erythritol                     | Xenobiotics            | Food Component/Plant                       | 222285  | 149-32-6            | HMDB02994 |
| 42420 | erythronate*                   | Carbohydrate           | Aminosugar Metabolism                      | 2781043 | 88759-55-1          | HMDB00613 |
| 39603 | ethyl glucuronide              | Xenobiotics            | Chemical                                   | 152226  | 17685-04-0          | HMDB10325 |
| 15765 | ethylmalonate                  | Amino Acid             | Leucine, Isoleucine and Valine Metabolism  | 11756   | 601-75-2            | HMDB00622 |
| 47112 | etiocholanolone glucuronide    | Lipid                  | Androgenic Steroids                        | 270605  | 03/09/3602          | HMDB04484 |
| 48715 | eugenol sulfate                | Xenobiotics            | Food Component/Plant                       | 180632  | 95480-60-7          |           |
| 47114 | ferulic acid 4-sulfate         | Xenobiotics            | Food Component/Plant                       | 6305574 | 86321-29-1          | HMDB29200 |
| 31548 | DSGEGDFXAEGGGVR*               | Peptide                | Fibrinogen Cleavage Peptide                |         |                     |           |
| 57712 | ADpSGEGDFXAEGGGVR*             | Peptide                | Fibrinogen Cleavage Peptide                |         | 886023-52-5         |           |
| 61837 | Fibrinopeptide B               | Peptide                | Fibrinogen Cleavage Peptide                |         | 36204-23-6          |           |
| 62813 | Fibrinopeptide B (1-13)        | Peptide                | Fibrinogen Cleavage Peptide                |         |                     |           |
| 2134  | FAD                            | Cofactors and Vitamins | Riboflavin Metabolism                      | 643975  | 146-14-5;84366-81-4 | HMDB01248 |
| 43493 | formiminoglutamate             | Amino Acid             | Histidine Metabolism                       | 439233  | 816-90-0            | HMDB00854 |
| 48195 | fructose                       | Carbohydrate           | Fructose, Mannose and Galactose Metabolism | 5984    | 57-48-7             | HMDB00660 |
| 1643  | fumarate                       | Energy                 | TCA Cycle                                  | 444972  | 100-17-8            | HMDB00134 |
| 27719 | galactonate                    | Carbohydrate           | Fructose, Mannose and Galactose Metabolism | 128869  | 299-28-5            | HMDB00565 |
| 38754 | gamma-carboxyglutamate         | Amino Acid             | Glutamate Metabolism                       | 40772   | 56271-99-9          | HMDB41900 |
| 44876 | gamma-CEHC                     | Cofactors and Vitamins | Tocopherol Metabolism                      | 133098  | 178167-75-4         | HMDB01931 |
| 42381 | gamma-CEHC glucuronide*        | Cofactors and Vitamins | Tocopherol Metabolism                      |         |                     |           |
| 37092 | gamma-glutamyl-2-aminobutyrate | Peptide                | Gamma-glutamyl Amino Acid                  |         | 16869-42-4          |           |
| 37063 | gamma-glutamylalanine          | Peptide                | Gamma-glutamyl Amino Acid                  | 440103  | 5875-41-2           | HMDB29142 |
| 55015 | gamma-glutamyl-alpha-lysine    | Peptide                | Gamma-glutamyl Amino Acid                  | 65254   |                     |           |
| 62104 | gamma-glutamylcitrulline*      | Peptide                | Gamma-glutamyl Amino Acid                  |         |                     |           |
| 33934 | gamma-glutamyl-epsilon-lysine  | Peptide                | Gamma-glutamyl Amino Acid                  | 7015685 | 17105-15-6          | HMDB03869 |
| 36738 | gamma-glutamylglutamate        | Peptide                | Gamma-glutamyl Amino Acid                  | 92865   | 1116-22-9           | HMDB11737 |
| 2730  | gamma-glutamylglutamine        | Peptide                | Gamma-glutamyl Amino Acid                  | 150914  | 10148-81-9          | HMDB11738 |
| 33949 | gamma-glutamylglycine          | Peptide                | Gamma-glutamyl Amino Acid                  | 165527  | 1948-29-4           | HMDB11667 |
| 18245 | gamma-glutamylhistidine        | Peptide                | Gamma-glutamyl Amino Acid                  | 7017195 | 37460-15-4          |           |

|       |                                    |                                   |                                                      |          |             |           |
|-------|------------------------------------|-----------------------------------|------------------------------------------------------|----------|-------------|-----------|
| 34456 | gamma-glutamylisoleucine*          | Peptide                           | Gamma-glutamyl Amino Acid                            | 14253342 |             | HMDB11170 |
| 18369 | gamma-glutamylleucine              | Peptide                           | Gamma-glutamyl Amino Acid                            | 151023   | 2566-39-4   | HMDB11171 |
| 44872 | gamma-glutamylmethionine           | Peptide                           | Gamma-glutamyl Amino Acid                            | 7009567  | 17663-87-5  | HMDB29155 |
| 33422 | gamma-glutamylphenylalanine        | Peptide                           | Gamma-glutamyl Amino Acid                            | 111299   | 7432-24-8   | HMDB00594 |
| 33364 | gamma-glutamylthreonine            | Peptide                           | Gamma-glutamyl Amino Acid                            | 76078708 | 5652-48-2   | HMDB29159 |
| 33947 | gamma-glutamyltryptophan           | Peptide                           | Gamma-glutamyl Amino Acid                            | 3989307  | 66471-20-3  | HMDB29160 |
| 2734  | gamma-glutamyltyrosine             | Peptide                           | Gamma-glutamyl Amino Acid                            | 94340    | 7432-23-7   | HMDB11741 |
| 43829 | gamma-glutamylvaline               | Peptide                           | Gamma-glutamyl Amino Acid                            | 7015683  | 2746-34-1   | HMDB11172 |
| 52473 | gamma-tocopherol/beta-tocopherol   | Cofactors and Vitamins            | Tocopherol Metabolism                                |          |             |           |
| 62061 | genistein sulfate*                 | Xenobiotics                       | Food Component/Plant                                 |          |             |           |
| 18280 | gentisate                          | Amino Acid                        | Tyrosine Metabolism                                  | 3469     | 490-79-9    | HMDB00152 |
| 587   | gluconate                          | Xenobiotics                       | Food Component/Plant                                 | 10690    | 527-07-1    | HMDB00625 |
| 48152 | glucose                            | Carbohydrate                      | Glycolysis, Gluconeogenesis, and Pyruvate Metabolism | 79025    | 50-99-7     | HMDB00122 |
| 15443 | glucuronate                        | Carbohydrate                      | Aminosugar Metabolism                                | 444791   | 207300-70-7 | HMDB00127 |
| 61887 | glucuronide of C10H18O2 (7)*       | Partially Characterized Molecules | Partially Characterized Molecules                    |          |             |           |
| 57    | glutamate                          | Amino Acid                        | Glutamate Metabolism                                 | 611      | 56-86-0     | HMDB00148 |
| 53    | glutamine                          | Amino Acid                        | Glutamate Metabolism                                 | 5961     | 56-85-9     | HMDB00641 |
| 396   | glutarate (C5-DC)                  | Lipid                             | Fatty Acid, Dicarboxylate                            | 743      | 110-94-1    | HMDB00661 |
| 44664 | glutaroylcarnitine (C5)            | Amino Acid                        | Lysine Metabolism                                    | 71464488 | 102636-82-8 | HMDB13130 |
| 1572  | glycerate                          | Carbohydrate                      | Glycolysis, Gluconeogenesis, and Pyruvate Metabolism | 752      | 600-19-1    | HMDB00139 |
| 15122 | glycerol                           | Lipid                             | Glycerolipid Metabolism                              | 753      | 56-81-5     | HMDB00131 |
| 43847 | glycerol 3-phosphate               | Lipid                             | Glycerolipid Metabolism                              | 754      | 29849-82-9  | HMDB00126 |
| 37455 | glycerophosphoethanolamine         | Lipid                             | Phospholipid Metabolism                              | 123874   | 33049-08-0  | HMDB00114 |
| 48857 | glycerophosphoglycerol             | Lipid                             | Glycerolipid Metabolism                              | 439964   |             |           |
| 15990 | glycerophosphorylcholine (GPC)     | Lipid                             | Phospholipid Metabolism                              | 71920    | 28319-77-9  | HMDB00086 |
| 58    | glycine                            | Amino Acid                        | Glycine, Serine and Threonine Metabolism             | 750      | 56-40-6     | HMDB00123 |
| 62146 | glycine conjugate of C10H14O2 (1)* | Partially Characterized Molecules | Partially Characterized Molecules                    |          |             |           |
| 62065 | glyco-alpha-muricholate            | Lipid                             | Primary Bile Acid Metabolism                         |          |             |           |

|       |                                                                |             |                                |          |                   |           |
|-------|----------------------------------------------------------------|-------------|--------------------------------|----------|-------------------|-----------|
| 62066 | glyco-beta-muricholate                                         | Lipid       | Primary Bile Acid Metabolism   |          |                   |           |
| 32346 | glycochenodeoxycholate                                         | Lipid       | Primary Bile Acid Metabolism   | 12544    | 16564-43-5        | HMDB00637 |
| 52974 | glycochenodeoxycholate 3-sulfate                               | Lipid       | Primary Bile Acid Metabolism   |          |                   |           |
| 52983 | glycochenodeoxycholate glucuronide (1)                         | Lipid       | Primary Bile Acid Metabolism   |          |                   |           |
| 18476 | glycocholate                                                   | Lipid       | Primary Bile Acid Metabolism   | 10140    | 475-31-0;863-57-0 | HMDB00138 |
| 32599 | glycocholate sulfate*                                          | Lipid       | Secondary Bile Acid Metabolism |          |                   |           |
| 18477 | glycodeoxycholate                                              | Lipid       | Secondary Bile Acid Metabolism | 3035026  | 360-65-6          | HMDB00631 |
| 52975 | glycodeoxycholate 3-sulfate                                    | Lipid       | Secondary Bile Acid Metabolism |          |                   |           |
| 42574 | glycohyocholate                                                | Lipid       | Secondary Bile Acid Metabolism |          |                   |           |
| 31912 | glycolithocholate                                              | Lipid       | Secondary Bile Acid Metabolism | 115245   | 474-74-8          | HMDB00698 |
| 32620 | glycolithocholate sulfate*                                     | Lipid       | Secondary Bile Acid Metabolism | 72222    | 15324-64-8        | HMDB02639 |
| 57595 | glycosyl ceramide (d18:1/20:0, d16:1/22:0)*                    | Lipid       | Hexosylceramides (HCER)        |          |                   |           |
| 57448 | glycosyl ceramide (d18:1/23:1, d17:1/24:1)*                    | Lipid       | Hexosylceramides (HCER)        |          |                   |           |
| 57453 | glycosyl ceramide (d18:2/24:1, d18:1/24:2)*                    | Lipid       | Hexosylceramides (HCER)        |          |                   |           |
| 57444 | glycosyl-N-(2-hydroxynervonoyl)-sphingosine (d18:1/24:1(2OH))* | Lipid       | Hexosylceramides (HCER)        |          |                   |           |
| 57421 | glycosyl-N-behenoyl-sphingadienine (d18:2/22:0)*               | Lipid       | Hexosylceramides (HCER)        |          |                   |           |
| 57371 | glycosyl-N-behenoyl-sphingosine (d18:1/22:0)*                  | Lipid       | Hexosylceramides (HCER)        |          |                   |           |
| 57369 | glycosyl-N-nervonoyl-sphingosine (d18:1/24:1)*                 | Lipid       | Hexosylceramides (HCER)        |          |                   |           |
| 53013 | glycosyl-N-palmitoyl-sphingosine (d18:1/16:0)                  | Lipid       | Hexosylceramides (HCER)        |          |                   |           |
| 52234 | glycosyl-N-stearoyl-sphingosine (d18:1/18:0)                   | Lipid       | Hexosylceramides (HCER)        |          |                   |           |
| 57445 | glycosyl-N-tricosanoyl-sphingadienine (d18:2/23:0)*            | Lipid       | Hexosylceramides (HCER)        |          |                   |           |
| 39379 | glycoursodeoxycholate                                          | Lipid       | Secondary Bile Acid Metabolism | 12310288 | 64480-66-6        | HMDB00708 |
| 62518 | glycoursodeoxycholate glucuronide (2)                          | Lipid       | Secondary Bile Acid Metabolism |          |                   |           |
| 39789 | glycyrrhetinate                                                | Xenobiotics | Food Component/Plant           | 18526330 | 471-53-4          | HMDB11628 |
| 46111 | guaiacol sulfate                                               | Xenobiotics | Benzoate Metabolism            | 22473    |                   | HMDB60013 |
| 43802 | guanidinoacetate                                               | Amino Acid  | Creatine Metabolism            | 763      | 352-97-6          | HMDB00128 |
| 32446 | guanidinosuccinate                                             | Amino Acid  | Guanidino and Acetamido        | 97856    | 6133-30-8         | HMDB03157 |

|       |                                   |                        | Metabolism                                     |          |            |           |
|-------|-----------------------------------|------------------------|------------------------------------------------|----------|------------|-----------|
| 1573  | guanosine                         | Nucleotide             | Purine Metabolism,<br>Guanine containing       | 6802     | 118-00-3   | HMDB00133 |
| 46957 | gulonate*                         | Cofactors and Vitamins | Ascorbate and Aldarate<br>Metabolism           | 9794176  | 20246-53-1 | HMDB03290 |
| 41754 | heme                              | Cofactors and Vitamins | Hemoglobin and<br>Porphyrin Metabolism         | 26945    | 14875-96-8 | HMDB03178 |
| 57658 | heneicosapentaenoate (21:5n3)     | Lipid                  | Polyunsaturated Fatty<br>Acid (n3 and n6)      | 11998573 | 24257-10-1 |           |
| 62443 | heptadecenamamide (17:1)*         | Lipid                  | Fatty Acid, Amide                              |          |            |           |
| 61866 | heptenedioate (C7:1-DC)*          | Lipid                  | Fatty Acid, Dicarboxylate                      |          |            |           |
| 57652 | hexadecadienoate (16:2n6)         | Lipid                  | Polyunsaturated Fatty<br>Acid (n3 and n6)      |          | 28290-73-5 | HMDB00477 |
| 35678 | hexadecanedioate (C16)            | Lipid                  | Fatty Acid, Dicarboxylate                      | 10459    | 505-54-4   | HMDB00672 |
| 57428 | hexadecasphingosine (d16:1)*      | Lipid                  | Sphingosines                                   |          |            |           |
| 61862 | hexadecenedioate (C16:1-DC)*      | Lipid                  | Fatty Acid, Dicarboxylate                      |          |            |           |
| 32328 | hexanoylcarnitine (C6)            | Lipid                  | Fatty Acid<br>Metabolism(Acyl<br>Carnitine)    | 6426853  | 6920-35-0  | HMDB00705 |
| 54907 | hexanoylglutamine                 | Lipid                  | Fatty Acid Metabolism<br>(Acyl Glutamine)      |          |            |           |
| 35436 | hexanoylglycine (C6)              | Lipid                  | Fatty Acid<br>Metabolism(Acyl Glycine)         | 99463    | 24003-67-6 | HMDB00701 |
| 15753 | hippurate                         | Xenobiotics            | Benzoate Metabolism                            | 464      | 495-69-2   | HMDB00714 |
| 59    | histidine                         | Amino Acid             | Histidine Metabolism                           | 6274     | 5934-29-2  | HMDB00177 |
| 62278 | histidine betaine (hercynine)*    | Xenobiotics            | Food Component/Plant                           | 3083620  | 534-30-5   |           |
| 22137 | homoarginine                      | Amino Acid             | Urea cycle; Arginine and<br>Proline Metabolism | 9085     | 156-86-5   | HMDB00670 |
| 22138 | homocitrulline                    | Amino Acid             | Urea cycle; Arginine and<br>Proline Metabolism | 65072    | 1190-49-4  | HMDB00679 |
| 33009 | homostachydrine*                  | Xenobiotics            | Food Component/Plant                           | 441447   | 1195-94-4  | HMDB33433 |
| 1101  | homovanillate (HVA)               | Amino Acid             | Tyrosine Metabolism                            | 1738     | 306-08-1   | HMDB00118 |
| 57711 | HWESASXX*                         | Peptide                | Polypeptide                                    |          |            |           |
| 40473 | hydantoin-5-propionate            | Amino Acid             | Histidine Metabolism                           | 782      | 5624-26-0  | HMDB01212 |
| 39625 | hydrochlorothiazide               | Xenobiotics            | Drug - Cardiovascular                          | 3639     | 58-93-5    | HMDB01928 |
| 35322 | hydroquinone sulfate              | Xenobiotics            | Drug - Topical Agents                          | 161220   | 123-31-9   | HMDB02434 |
| 62060 | hydroxyasparagine                 | Amino Acid             | Alanine and Aspartate<br>Metabolism            | 97663    |            | HMDB32332 |
| 62277 | hydroxy-CMPF*                     | Lipid                  | Fatty Acid, Dicarboxylate                      |          |            |           |
| 38661 | hydroxycotinine                   | Xenobiotics            | Tobacco Metabolite                             | 10219774 | 34834-67-8 | HMDB01390 |
| 62959 | hydroxy-N6,N6,N6-trimethyllysine* | Amino Acid             | Lysine Metabolism                              |          |            |           |



|       |                                                 |                        |                                                      |          |             |           |
|-------|-------------------------------------------------|------------------------|------------------------------------------------------|----------|-------------|-----------|
| 62851 | hydroxypalmitoyl sphingomyelin (d18:1/16:0(OH)) | Lipid                  | Sphingomyelins                                       |          |             |           |
| 34093 | hyocholate                                      | Lipid                  | Secondary Bile Acid Metabolism                       | 92805    | 547-75-1    | HMDB00760 |
| 590   | hypotaurine                                     | Amino Acid             | Methionine, Cysteine, SAM and Taurine Metabolism     | 107812   | 300-84-5    | HMDB00965 |
| 3127  | hypoxanthine                                    | Nucleotide             | Purine Metabolism, (Hypo)Xanthine/Inosine containing | 790      | 68-94-0     | HMDB00157 |
| 17799 | ibuprofen                                       | Xenobiotics            | Drug - Analgesics, Anesthetics                       | 3672     | 15687-27-1  | HMDB01925 |
| 38366 | ibuprofen acyl glucuronide                      | Xenobiotics            | Drug - Analgesics, Anesthetics                       | 163959   | 115075-59-7 |           |
| 15716 | imidazole lactate                               | Amino Acid             | Histidine Metabolism                                 | 440129   | 14403-45-3  | HMDB02320 |
| 40730 | imidazole propionate                            | Amino Acid             | Histidine Metabolism                                 | 70630    | 1074-59-5   | HMDB02271 |
| 21025 | iminodiacetate (IDA)                            | Xenobiotics            | Chemical                                             | 8897     | 142-73-4    | HMDB11753 |
| 38116 | indole-3-carboxylate                            | Amino Acid             | Tryptophan Metabolism                                | 69867    | 771-50-6    | HMDB03320 |
| 27513 | indoleacetate                                   | Amino Acid             | Tryptophan Metabolism                                | 802      | 6505-45-9   | HMDB00197 |
| 62279 | indoleacetylcarnitine*                          | Xenobiotics            | Chemical                                             |          |             |           |
| 42087 | indoleacetylglutamine                           | Amino Acid             | Tryptophan Metabolism                                | 25200879 |             | HMDB13240 |
| 18349 | indolelactate                                   | Amino Acid             | Tryptophan Metabolism                                | 92904    | 832-97-3    | HMDB00671 |
| 32405 | indolepropionate                                | Amino Acid             | Tryptophan Metabolism                                | 3744     | 830-96-6    | HMDB02302 |
| 43374 | indolin-2-one                                   | Xenobiotics            | Food Component/Plant                                 | 321710   | 59-48-3     |           |
| 1123  | inosine                                         | Nucleotide             | Purine Metabolism, (Hypo)Xanthine/Inosine containing | 6021     | 58-63-9     | HMDB00195 |
| 33441 | isobutyrylcarnitine (C4)                        | Amino Acid             | Leucine, Isoleucine and Valine Metabolism            | 168379   | 25518-49-4  | HMDB00736 |
| 35437 | isobutyrylglycine (C4)                          | Amino Acid             | Leucine, Isoleucine and Valine Metabolism            | 10855600 | 15926-18-8  | HMDB00730 |
| 48997 | isoeugenol sulfate                              | Xenobiotics            | Food Component/Plant                                 |          |             |           |
| 1125  | isoleucine                                      | Amino Acid             | Leucine, Isoleucine and Valine Metabolism            | 6306     | 73-32-5     | HMDB00172 |
| 57577 | isoursodeoxycholate                             | Lipid                  | Secondary Bile Acid Metabolism                       | 127601   | 78919-26-3  | HMDB00686 |
| 44656 | isovalerate (C5)                                | Amino Acid             | Leucine, Isoleucine and Valine Metabolism            | 10430    | 503-74-2    | HMDB00718 |
| 34407 | isovalerylcarnitine (C5)                        | Amino Acid             | Leucine, Isoleucine and Valine Metabolism            | 6426851  | 31023-24-2  | HMDB00688 |
| 35107 | isovalerylglycine                               | Amino Acid             | Leucine, Isoleucine and Valine Metabolism            | 546304   | 16284-60-9  | HMDB00678 |
| 32426 | l-urobilinogen                                  | Cofactors and Vitamins | Hemoglobin and Porphyrin Metabolism                  | 26818    | 14684-37-8  | HMDB04157 |
| 1417  | kynurenate                                      | Amino Acid             | Tryptophan Metabolism                                | 3845     | 492-27-3    | HMDB00715 |

|       |                                                     |                        |                                                            |          |            |           |
|-------|-----------------------------------------------------|------------------------|------------------------------------------------------------|----------|------------|-----------|
| 15140 | kynurenine                                          | Amino Acid             | Tryptophan Metabolism                                      | 161166   | 2922-83-0  | HMDB00684 |
| 527   | lactate                                             | Carbohydrate           | Glycolysis,<br>Gluconeogenesis, and<br>Pyruvate Metabolism | 612      | 79-33-4    | HMDB00190 |
| 57422 | lactosyl-N-behenoyl-sphingosine (d18:1/22:0)*       | Lipid                  | Lactosylceramides<br>(LCER)                                |          |            |           |
| 57370 | lactosyl-N-nervonoyl-sphingosine (d18:1/24:1)*      | Lipid                  | Lactosylceramides<br>(LCER)                                |          |            |           |
| 53010 | lactosyl-N-palmitoyl-sphingosine (d18:1/16:0)       | Lipid                  | Lactosylceramides<br>(LCER)                                |          | 4201-62-1  |           |
| 42002 | lanthionine                                         | Amino Acid             | Methionine, Cysteine,<br>SAM and Taurine<br>Metabolism     | 98504    | 02/08/3183 |           |
| 1645  | laurate (12:0)                                      | Lipid                  | Medium Chain Fatty Acid                                    | 3893     | 143-07-7   | HMDB00638 |
| 34534 | laurylcarnitine (C12)                               | Lipid                  | Fatty Acid<br>Metabolism(Acyl<br>Carnitine)                | 10427569 | 25518-54-1 | HMDB02250 |
| 60    | leucine                                             | Amino Acid             | Leucine, Isoleucine and<br>Valine Metabolism               | 6106     | 61-90-5    | HMDB00687 |
| 37530 | leukotriene B4                                      | Lipid                  | Eicosanoid                                                 | 5280492  | 71160-24-2 | HMDB01085 |
| 57330 | lignoceroyl sphingomyelin (d18:1/24:0)              | Lipid                  | Sphingomyelins                                             |          | 60037-60-7 |           |
| 57515 | lignoceroylcarnitine (C24)*                         | Lipid                  | Fatty Acid<br>Metabolism(Acyl<br>Carnitine)                |          |            |           |
| 1105  | linoleate (18:2n6)                                  | Lipid                  | Polyunsaturated Fatty<br>Acid (n3 and n6)                  | 5280450  | 60-33-3    | HMDB00673 |
| 34035 | linolenate (18:3n3 or 3n6)                          | Lipid                  | Polyunsaturated Fatty<br>Acid (n3 and n6)                  | 5280934  |            | HMDB03073 |
| 57511 | linolenoylcarnitine (C18:3)*                        | Lipid                  | Fatty Acid<br>Metabolism(Acyl<br>Carnitine)                |          |            |           |
| 52608 | linoleoyl ethanolamide                              | Lipid                  | Endocannabinoid                                            | 5283446  | 68171-52-8 | HMDB12252 |
| 54955 | linoleoyl-arachidonoyl-glycerol (18:2/20:4) [1]*    | Lipid                  | Diacylglycerol                                             |          |            | HMDB07257 |
| 54956 | linoleoyl-arachidonoyl-glycerol (18:2/20:4) [2]*    | Lipid                  | Diacylglycerol                                             |          |            | HMDB07257 |
| 46223 | linoleoylcarnitine (C18:2)*                         | Lipid                  | Fatty Acid<br>Metabolism(Acyl<br>Carnitine)                | 6450015  | 36816-10-1 | HMDB06469 |
| 57463 | linoleoylcholine*                                   | Lipid                  | Fatty Acid Metabolism<br>(Acyl Choline)                    |          |            |           |
| 54950 | linoleoyl-docosahexaenoyl-glycerol (18:2/22:6) [2]* | Lipid                  | Diacylglycerol                                             |          |            | HMDB07266 |
| 54964 | linoleoyl-linolenoyl-glycerol (18:2/18:3) [2]*      | Lipid                  | Diacylglycerol                                             |          |            | HMDB07250 |
| 54968 | linoleoyl-linoleoyl-glycerol (18:2/18:2) [1]*       | Lipid                  | Diacylglycerol                                             |          |            | HMDB07248 |
| 62526 | lithocholate sulfate (1)                            | Lipid                  | Secondary Bile Acid<br>Metabolism                          |          |            |           |
| 40173 | L-urobilin                                          | Cofactors and Vitamins | Hemoglobin and<br>Porphyrin Metabolism                     | 5280818  | 34217-90-8 | HMDB04159 |

|       |                                              |              |                                                  |          |             |           |
|-------|----------------------------------------------|--------------|--------------------------------------------------|----------|-------------|-----------|
| 1301  | lysine                                       | Amino Acid   | Lysine Metabolism                                | 5962     | 56-87-1     | HMDB00182 |
| 1303  | malate                                       | Energy       | TCA Cycle                                        | 525      | 6915-15-7   | HMDB00156 |
| 20676 | maleate                                      | Lipid        | Fatty Acid, Dicarboxylate                        | 444266   | 110-16-7    | HMDB00176 |
| 46142 | mannitol/sorbitol                            | Carbohydrate | Fructose, Mannose and Galactose Metabolism       | 5780     |             | HMDB00247 |
| 62864 | mannonate*                                   | Xenobiotics  | Food Component/Plant                             | 3246006  | 642-99-9    |           |
| 48153 | mannose                                      | Carbohydrate | Fructose, Mannose and Galactose Metabolism       | 18950    | 3458-28-4   | HMDB00169 |
| 1121  | margarate (17:0)                             | Lipid        | Long Chain Fatty Acid                            | 10465    | 506-12-7    | HMDB02259 |
| 57512 | margaroylcarnitine (C17)*                    | Lipid        | Fatty Acid Metabolism(Acyl Carnitine)            |          | 106182-29-0 | HMDB06210 |
| 35174 | mead acid (20:3n9)                           | Lipid        | Polyunsaturated Fatty Acid (n3 and n6)           | 5312531  | 20590-32-3  | HMDB10378 |
| 31461 | melamine                                     | Xenobiotics  | Chemical                                         | 7955     | 108-78-1    | HMDB41922 |
| 38306 | metformin                                    | Xenobiotics  | Drug - Metabolic                                 | 4091     | 1115-70-4   | HMDB01921 |
| 1302  | methionine                                   | Amino Acid   | Methionine, Cysteine, SAM and Taurine Metabolism | 6137     | 63-68-3     | HMDB00696 |
| 44878 | methionine sulfone                           | Amino Acid   | Methionine, Cysteine, SAM and Taurine Metabolism | 69961    | 820-10-0    |           |
| 18374 | methionine sulfoxide                         | Amino Acid   | Methionine, Cysteine, SAM and Taurine Metabolism | 158980   | 3226-65-1   | HMDB02005 |
| 46144 | methyl glucopyranoside (alpha + beta)        | Xenobiotics  | Food Component/Plant                             |          |             |           |
| 1584  | methyl indole-3-acetate                      | Xenobiotics  | Food Component/Plant                             | 74706    | 1912-33-0   | HMDB29738 |
| 48429 | methyl-4-hydroxybenzoate sulfate             | Xenobiotics  | Benzoate Metabolism                              |          |             |           |
| 61873 | methylnaphthyl sulfate (2)*                  | Xenobiotics  | Chemical                                         |          |             |           |
| 15745 | methysuccinate                               | Amino Acid   | Leucine, Isoleucine and Valine Metabolism        | 10349    | 498-21-5    | HMDB01844 |
| 18037 | metoprolol                                   | Xenobiotics  | Drug - Cardiovascular                            | 4171     | 56392-17-7  | HMDB01932 |
| 34109 | metoprolol acid metabolite*                  | Xenobiotics  | Drug - Cardiovascular                            | 62936    | 56392-14-4  |           |
| 57642 | metronidazole                                | Xenobiotics  | Drug - Antibiotic                                | 4173     | 73334-05-1  | HMDB15052 |
| 1124  | myo-inositol                                 | Lipid        | Inositol Metabolism                              | 892      | 87-89-8     | HMDB00211 |
| 1365  | myristate (14:0)                             | Lipid        | Long Chain Fatty Acid                            | 11005    | 544-63-8    | HMDB00806 |
| 32418 | myristoleate (14:1n5)                        | Lipid        | Long Chain Fatty Acid                            | 5281119  | 544-64-9    | HMDB02000 |
| 48182 | myristoleoylcarnitine (C14:1)*               | Lipid        | Fatty Acid Metabolism(Acyl Carnitine)            | 90659872 | 889848-55-9 |           |
| 57365 | myristoyl dihydrosphingomyelin (d18:0/14:0)* | Lipid        | Dihydrosphingomyelins                            |          |             | HMDB12085 |

|       |                                               |                        |                                                            |          |                     |           |
|-------|-----------------------------------------------|------------------------|------------------------------------------------------------|----------|---------------------|-----------|
| 33952 | myristoylcarnitine (C14)                      | Lipid                  | Fatty Acid<br>Metabolism(Acyl<br>Carnitine)                | 6426854  | 18822-89-4          | HMDB05066 |
| 57407 | myristoyl-linoleoyl-glycerol (14:0/18:2) [1]* | Lipid                  | Diacylglycerol                                             |          |                     |           |
| 31536 | N-(2-furoyl)glycine                           | Xenobiotics            | Food Component/Plant                                       | 21863    | 5657-19-2;5657-19-2 | HMDB00439 |
| 57687 | N,N,N-trimethyl-5-aminovalerate               | Amino Acid             | Lysine Metabolism                                          |          |                     |           |
| 62947 | N,N,N-trimethyl-alanylproline betaine (TMAP)  | Amino Acid             | Urea cycle; Arginine and<br>Proline Metabolism             |          |                     |           |
| 40469 | N1-Methyl-2-pyridone-5-carboxamide            | Cofactors and Vitamins | Nicotinate and<br>Nicotinamide Metabolism                  | 69698    | 701-44-0            | HMDB04193 |
| 15650 | 1-methyladenosine                             | Nucleotide             | Purine Metabolism,<br>Adenine containing                   | 27476    | 15763-06-1          | HMDB03331 |
| 48351 | N1-methylinosine                              | Nucleotide             | Purine Metabolism,<br>(Hypo)Xanthine/Inosine<br>containing | 65095    | 20245-33-4          | HMDB02721 |
| 35137 | N2,N2-dimethylguanosine                       | Nucleotide             | Purine Metabolism,<br>Guanine containing                   | 92919    | 2140-67-2           | HMDB04824 |
| 43591 | N2,N5-diacetylornithine                       | Amino Acid             | Urea cycle; Arginine and<br>Proline Metabolism             | 10398396 | 39825-23-5          |           |
| 62954 | N2-acetyl,N6-methyllysine                     | Amino Acid             | Lysine Metabolism                                          |          |                     |           |
| 62107 | N4-acetyl-5-hydroxysulfamethoxazole*          | Xenobiotics            | Drug - Antibiotic                                          |          |                     |           |
| 35130 | N4-acetylcytidine                             | Nucleotide             | Pyrimidine Metabolism,<br>Cytidine containing              | 107461   | 3768-18-1           | HMDB05923 |
| 62106 | N4-acetylsulfamethoxazole*                    | Xenobiotics            | Drug - Antibiotic                                          | 65280    |                     | HMDB13854 |
| 1498  | N6,N6,N6-trimethyllysine                      | Amino Acid             | Lysine Metabolism                                          | 440120   | 23284-33-5          | HMDB01325 |
| 62862 | N6,N6-dimethyllysine                          | Amino Acid             | Lysine Metabolism                                          | 193344   | 2259-86-1           | HMDB13287 |
| 36752 | N6-acetyllysine                               | Amino Acid             | Lysine Metabolism                                          | 92832    | 692-04-6            | HMDB00206 |
| 35157 | N6-carbamoylthreonyladenosine                 | Nucleotide             | Purine Metabolism,<br>Adenine containing                   | 161466   | 24719-82-2          | HMDB41623 |
| 62860 | N6-methyllysine                               | Amino Acid             | Lysine Metabolism                                          | 164795   | 1188-07-4           | HMDB02038 |
| 43255 | N-acetyl-1-methylhistidine*                   | Amino Acid             | Histidine Metabolism                                       | 193270   |                     |           |
| 62059 | N-acetyl-2-aminooctanoate*                    | Lipid                  | Fatty Acid, Amino                                          | 95555    |                     | HMDB59745 |
| 1585  | N-acetyllanine                                | Amino Acid             | Alanine and Aspartate<br>Metabolism                        | 88064    | 97-69-8             | HMDB00766 |
| 45404 | N-acetyllalliin                               | Xenobiotics            | Food Component/Plant                                       |          |                     |           |
| 33953 | N-acetyllarginine                             | Amino Acid             | Urea cycle; Arginine and<br>Proline Metabolism             | 67427    | 155-84-0            | HMDB04620 |
| 22185 | N-acetylaspartate (NAA)                       | Amino Acid             | Alanine and Aspartate<br>Metabolism                        | 65065    | 997-55-7;997-55-7   | HMDB00812 |
| 35665 | N-acetyl-aspartyl-glutamate (NAAG)            | Amino Acid             | Glutamate Metabolism                                       | 5255     | 3106-85-2           | HMDB01067 |
| 37432 | N-acetyl-beta-alanine                         | Nucleotide             | Pyrimidine Metabolism,<br>Uracil containing                | 76406    | 3025-95-4           |           |
| 43488 | N-acetylcarnosine                             | Amino Acid             | Histidine Metabolism                                       | 9903482  | 56353-15-2          | HMDB12881 |

|       |                                           |              |                                                  |         |            |           |
|-------|-------------------------------------------|--------------|--------------------------------------------------|---------|------------|-----------|
| 48434 | N-acetylcitrulline                        | Amino Acid   | Urea cycle; Arginine and Proline Metabolism      | 656979  | 33965-42-3 | HMDB00856 |
| 46539 | N-acetylglucosamine/N-acetylgalactosamine | Carbohydrate | Aminosugar Metabolism                            | 24139   |            | HMDB00215 |
| 48149 | N-acetylglucosaminylasparagine            | Carbohydrate | Aminosugar Metabolism                            | 123826  | 2776-93-4  | HMDB00489 |
| 15720 | N-acetylglutamate                         | Amino Acid   | Glutamate Metabolism                             | 70914   | 03/08/5817 | HMDB01138 |
| 33943 | N-acetylglutamine                         | Amino Acid   | Glutamate Metabolism                             | 182230  | 2490-97-3  | HMDB06029 |
| 27710 | N-acetylglycine                           | Amino Acid   | Glycine, Serine and Threonine Metabolism         | 10972   | 543-24-8   | HMDB00532 |
| 33946 | N-acetylhistidine                         | Amino Acid   | Histidine Metabolism                             | 75619   | 39145-52-3 | HMDB32055 |
| 33967 | N-acetylisoleucine                        | Amino Acid   | Leucine, Isoleucine and Valine Metabolism        | 2802421 | 3077-46-1  | HMDB61684 |
| 62309 | N-acetyl-isoputrescine*                   | Amino Acid   | Polyamine Metabolism                             |         |            |           |
| 1587  | N-acetylleucine                           | Amino Acid   | Leucine, Isoleucine and Valine Metabolism        | 70912   | 1188-21-2  | HMDB11756 |
| 1589  | N-acetylmethionine                        | Amino Acid   | Methionine, Cysteine, SAM and Taurine Metabolism | 448580  | 65-82-7    | HMDB11745 |
| 32377 | N-acetylneuraminate                       | Carbohydrate | Aminosugar Metabolism                            | 439197  | 131-48-6   | HMDB00230 |
| 33950 | N-acetylphenylalanine                     | Amino Acid   | Phenylalanine Metabolism                         | 74839   | 2018-61-3  | HMDB00512 |
| 34387 | N-acetylproline                           | Amino Acid   | Urea cycle; Arginine and Proline Metabolism      | 322640  | 1074-79-9  |           |
| 37496 | N-acetylputrescine                        | Amino Acid   | Polyamine Metabolism                             | 122356  | 18233-70-0 | HMDB02064 |
| 37076 | N-acetyserine                             | Amino Acid   | Glycine, Serine and Threonine Metabolism         | 65249   | 97-14-3    | HMDB02931 |
| 48187 | N-acetyltaurine                           | Amino Acid   | Methionine, Cysteine, SAM and Taurine Metabolism | 159864  |            |           |
| 33939 | N-acetylthreonine                         | Amino Acid   | Glycine, Serine and Threonine Metabolism         | 152204  | 17093-74-2 | HMDB62557 |
| 33959 | N-acetyltryptophan                        | Amino Acid   | Tryptophan Metabolism                            | 700653  | 1218-34-4  | HMDB13713 |
| 32390 | N-acetyltyrosine                          | Amino Acid   | Tyrosine Metabolism                              | 68310   | 537-55-3   | HMDB00866 |
| 1591  | N-acetylvaline                            | Amino Acid   | Leucine, Isoleucine and Valine Metabolism        | 66789   | 96-81-1    | HMDB11757 |
| 12122 | naproxen                                  | Xenobiotics  | Drug - Analgesics, Anesthetics                   | 156391  | 22204-53-1 | HMDB01923 |
| 57372 | N-behenoyl-sphingadienine (d18:2/22:0)*   | Lipid        | Ceramides                                        |         |            |           |
| 62852 | N-carbamoylvaline                         | Amino Acid   | Leucine, Isoleucine and Valine Metabolism        | 5151292 | 26081-00-5 |           |
| 43249 | N-delta-acetylmethionine                  | Amino Acid   | Urea cycle; Arginine and Proline Metabolism      | 9920500 |            |           |
| 57531 | nervonoylcarnitine (C24:1)*               | Lipid        | Fatty Acid Metabolism(Acyl Carnitine)            |         |            |           |
| 43549 | N-formylanthranilic acid                  | Amino Acid   | Tryptophan Metabolism                            | 101399  | 3342-77-6  | HMDB04089 |

|       |                                               |                        |                                                  |          |                        |           |
|-------|-----------------------------------------------|------------------------|--------------------------------------------------|----------|------------------------|-----------|
| 2829  | N-formylmethionine                            | Amino Acid             | Methionine, Cysteine, SAM and Taurine Metabolism | 439750   | 4289-98-9              | HMDB01015 |
| 48433 | N-formylphenylalanine                         | Amino Acid             | Tyrosine Metabolism                              | 759256   | 13200-85-6             |           |
| 594   | nicotinamide                                  | Cofactors and Vitamins | Nicotinate and Nicotinamide Metabolism           | 936      | 98-92-0                | HMDB01406 |
| 34598 | nifedipine                                    | Xenobiotics            | Drug - Cardiovascular                            | 4485     | 21829-25-4             |           |
| 57810 | nisinate (24:6n3)                             | Lipid                  | Polyunsaturated Fatty Acid (n3 and n6)           | 11792612 | 68378-49-4             | HMDB02007 |
| 32462 | N-linoleoylglycine                            | Lipid                  | Fatty Acid Metabolism(Acyl Glycine)              | 6433346  | 06/03/2764             |           |
| 61823 | N-linoleoylserine*                            | Lipid                  | Fatty Acid, Amide                                |          |                        |           |
| 61826 | N-linoleoyltaurine*                           | Lipid                  | Endocannabinoid                                  |          |                        |           |
| 62068 | N-methylhydroxyproline                        | Amino Acid             | Urea cycle; Arginine and Proline Metabolism      |          |                        |           |
| 47101 | N-methylpipecolate                            | Xenobiotics            | Bacterial/Fungal                                 | 11286529 | 41447-17-0             |           |
| 37431 | N-methylproline                               | Amino Acid             | Urea cycle; Arginine and Proline Metabolism      | 557      | 475-11-6               |           |
| 57664 | N-oleoylserine                                | Lipid                  | Endocannabinoid                                  |          |                        |           |
| 39732 | N-oleoyltaurine                               | Lipid                  | Endocannabinoid                                  | 6437033  | 52514-04-2             |           |
| 1356  | nonadecanoate (19:0)                          | Lipid                  | Long Chain Fatty Acid                            | 12591    | 646-30-0               | HMDB00772 |
| 61775 | nonanoylcarnitine (C9)                        | Lipid                  | Fatty Acid Metabolism(Acyl Carnitine)            |          |                        | HMDB13288 |
| 42092 | N-palmitoylglycine                            | Lipid                  | Fatty Acid Metabolism(Acyl Glycine)              | 151008   | 2441-41-0              | HMDB13034 |
| 57430 | N-palmitoyl-heptadecaspingosine (d17:1/16:0)* | Lipid                  | Ceramides                                        |          |                        |           |
| 57659 | N-palmitoylserine                             | Lipid                  | Endocannabinoid                                  | 6453686  | 58725-46-5;474943-14-1 |           |
| 57416 | N-palmitoyl-sphingadienine (d18:2/16:0)*      | Lipid                  | Ceramides                                        |          |                        |           |
| 52604 | N-palmitoyl-sphinganine (d18:0/16:0)          | Lipid                  | Dihydroceramides                                 | 5283572  | 5966-29-0              | HMDB11760 |
| 44877 | N-palmitoyl-sphingosine (d18:1/16:0)          | Lipid                  | Ceramides                                        | 5283564  | 24696-26-2             | HMDB04949 |
| 61822 | N-stearoylserine*                             | Lipid                  | Endocannabinoid                                  |          |                        |           |
| 1759  | N-stearoyl-sphinganine (d18:0/18:0)*          | Lipid                  | Dihydroceramides                                 | 5283573  | 2304-80-5              |           |
| 54979 | N-stearoyl-sphingosine (d18:1/18:0)*          | Lipid                  | Ceramides                                        | 5283565  | 104404-17-3            | HMDB04950 |
| 39730 | N-stearoyltaurine                             | Lipid                  | Endocannabinoid                                  | 168274   | 63155-80-6             |           |
| 31539 | O-acetylhomoserine                            | Amino Acid             | Glycine, Serine and Threonine Metabolism         | 439389   | 7540-67-2              |           |
| 36845 | o-cresol sulfate                              | Xenobiotics            | Benzoate Metabolism                              | 11615528 |                        |           |
| 61860 | octadecadienedioate (C18:2-DC)*               | Lipid                  | Fatty Acid, Dicarboxylate                        |          |                        |           |
| 36754 | octadecanedioate (C18)                        | Lipid                  | Fatty Acid, Dicarboxylate                        | 70095    | 871-70-5               | HMDB00782 |

|       |                                                     |                        |                                                |          |                  |           |
|-------|-----------------------------------------------------|------------------------|------------------------------------------------|----------|------------------|-----------|
| 61867 | octadecanedioylcarnitine (C18-DC)*                  | Lipid                  | Fatty Acid<br>Metabolism(Acyl<br>Carnitine)    |          | 123233-50-1      |           |
| 61861 | octadecenedioate (C18:1-DC)*                        | Lipid                  | Fatty Acid, Dicarboxylate                      |          |                  |           |
| 61865 | octadecenedioylcarnitine (C18:1-DC)*                | Lipid                  | Fatty Acid<br>Metabolism(Acyl<br>Carnitine)    |          | 251981-06-3      |           |
| 33936 | octanoylcarnitine (C8)                              | Lipid                  | Fatty Acid<br>Metabolism(Acyl<br>Carnitine)    | 123701   | 3671-77-0        | HMDB00791 |
| 52285 | oleate/vaccenate (18:1)                             | Lipid                  | Long Chain Fatty Acid                          |          |                  |           |
| 38102 | oleoyl ethanolamide                                 | Lipid                  | Endocannabinoid                                | 5283454  | 11-58-0;111-58-0 | HMDB02088 |
| 54960 | oleoyl-arachidonoyl-glycerol (18:1/20:4) [1]*       | Lipid                  | Diacylglycerol                                 |          |                  | HMDB07228 |
| 54961 | oleoyl-arachidonoyl-glycerol (18:1/20:4) [2]*       | Lipid                  | Diacylglycerol                                 |          |                  | HMDB07228 |
| 35160 | oleoylcarnitine (C18)                               | Lipid                  | Fatty Acid<br>Metabolism(Acyl<br>Carnitine)    | 6441392  | 38677-66-6       | HMDB05065 |
| 53260 | oleoylcholine                                       | Lipid                  | Fatty Acid Metabolism<br>(Acyl Choline)        |          |                  |           |
| 54970 | oleoyl-linolenoyl-glycerol (18:1/18:3) [2]*         | Lipid                  | Diacylglycerol                                 |          |                  | HMDB07220 |
| 46798 | oleoyl-linoleoyl-glycerol (18:1/18:2) [1]           | Lipid                  | Diacylglycerol                                 |          | 106292-55-1      | HMDB07219 |
| 46799 | oleoyl-linoleoyl-glycerol (18:1/18:2) [2]           | Lipid                  | Diacylglycerol                                 |          | 104346-53-4      | HMDB07219 |
| 54945 | oleoyl-oleoyl-glycerol (18:1/18:1) [1]*             | Lipid                  | Diacylglycerol                                 |          |                  | HMDB07218 |
| 54946 | oleoyl-oleoyl-glycerol (18:1/18:1) [2]*             | Lipid                  | Diacylglycerol                                 |          |                  | HMDB07218 |
| 1493  | ornithine                                           | Amino Acid             | Urea cycle; Arginine and<br>Proline Metabolism | 6262     | 3184-13-2        | HMDB03374 |
| 1505  | orotate                                             | Nucleotide             | Pyrimidine Metabolism,<br>Orotate containing   | 967      | 50887-69-9       | HMDB00226 |
| 35172 | orotidine                                           | Nucleotide             | Pyrimidine Metabolism,<br>Orotate containing   | 92751    | 314-50-1         | HMDB00788 |
| 45413 | O-sulfo-L-tyrosine                                  | Xenobiotics            | Chemical                                       | 514186   |                  |           |
| 20694 | oxalate (ethanedioate)                              | Cofactors and Vitamins | Ascorbate and Aldarate<br>Metabolism           | 971      | 144-62-7         | HMDB02329 |
| 41726 | oxypurinol                                          | Xenobiotics            | Drug - Metabolic                               | 4644     | 2465-59-0        | HMDB00786 |
| 1336  | palmitate (16:0)                                    | Lipid                  | Long Chain Fatty Acid                          | 985      | 1957/10/3        | HMDB00220 |
| 62438 | palmitoleamide (16:1)*                              | Lipid                  | Fatty Acid, Amide                              |          |                  |           |
| 33447 | palmitoleate (16:1n7)                               | Lipid                  | Long Chain Fatty Acid                          | 445638   | 373-49-9         | HMDB03229 |
| 57406 | palmitoleoyl-arachidonoyl-glycerol (16:1/20:4) [2]* | Lipid                  | Diacylglycerol                                 |          |                  |           |
| 53223 | palmitoleoylcarnitine (C16:1)*                      | Lipid                  | Fatty Acid<br>Metabolism(Acyl<br>Carnitine)    | 71464547 |                  |           |
| 54967 | palmitoleoyl-linoleoyl-glycerol (16:1/18:2) [1]*    | Lipid                  | Diacylglycerol                                 |          |                  | HMDB07132 |

|       |                                                    |                        |                                       |           |                      |           |
|-------|----------------------------------------------------|------------------------|---------------------------------------|-----------|----------------------|-----------|
| 52434 | palmitoyl dihydrosphingomyelin (d18:0/16:0)*       | Lipid                  | Dihydrosphingomyelins                 | 9939965   |                      |           |
| 37506 | palmitoyl sphingomyelin (d18:1/16:0)               | Lipid                  | Sphingomyelins                        | 9939941   | 6254-89-3            |           |
| 54957 | palmitoyl-arachidonoyl-glycerol (16:0/20:4) [1]*   | Lipid                  | Diacylglycerol                        |           |                      | HMDB07112 |
| 54958 | palmitoyl-arachidonoyl-glycerol (16:0/20:4) [2]*   | Lipid                  | Diacylglycerol                        |           |                      | HMDB07112 |
| 44681 | palmitoylcarnitine (C16)                           | Lipid                  | Fatty Acid Metabolism(Acyl Carnitine) | 461       | 6865-14-1            | HMDB00222 |
| 52944 | palmitoylcholine                                   | Lipid                  | Fatty Acid Metabolism (Acyl Choline)  | 151731    |                      |           |
| 52633 | palmitoyl-linoleoyl-glycerol (16:0/18:2) [1]*      | Lipid                  | Diacylglycerol                        | 9543695   |                      | HMDB07103 |
| 52634 | palmitoyl-linoleoyl-glycerol (16:0/18:2) [2]*      | Lipid                  | Diacylglycerol                        |           |                      | HMDB07103 |
| 54943 | palmitoyl-oleoyl-glycerol (16:0/18:1) [1]*         | Lipid                  | Diacylglycerol                        |           |                      | HMDB07102 |
| 54942 | palmitoyl-oleoyl-glycerol (16:0/18:1) [2]*         | Lipid                  | Diacylglycerol                        |           |                      | HMDB07102 |
| 1508  | pantothenate (Vitamin B5)                          | Cofactors and Vitamins | Pantothenate and CoA Metabolism       | 6613      | 137-08-6             | HMDB00210 |
| 18254 | paraxanthine                                       | Xenobiotics            | Xanthine Metabolism                   | 4687      | 611-59-6             | HMDB01860 |
| 48841 | p-cresol glucuronide*                              | Amino Acid             | Tyrosine Metabolism                   | 154035    | 17680-99-8           | HMDB11686 |
| 36103 | p-cresol sulfate                                   | Xenobiotics            | Benzoate Metabolism                   | 4615423   | 3233-57-7            | HMDB11635 |
| 1361  | pentadecanoate (15:0)                              | Lipid                  | Long Chain Fatty Acid                 | 13849     | 1002-84-2;10002-84-2 | HMDB00826 |
| 57564 | perfluorooctanesulfonate (PFOS)                    | Xenobiotics            | Chemical                              | 74483     | 1763-23-1            | HMDB59586 |
| 62071 | perfluorooctanoate (PFOA)*                         | Xenobiotics            | Chemical                              | 9554      |                      | HMDB59587 |
| 52747 | phenol glucuronide                                 | Amino Acid             | Tyrosine Metabolism                   | 87235     | 17685-05-1           | HMDB60014 |
| 32553 | phenol sulfate                                     | Amino Acid             | Tyrosine Metabolism                   | 74426     | 937-34-8             | HMDB60015 |
| 32396 | phenolphthalein beta-D-glucuronide                 | Xenobiotics            | Chemical                              | 3032634   | 6820-54-8            |           |
| 57745 | phenylacetate                                      | Amino Acid             | Phenylalanine Metabolism              | 999       | 103-82-2             | HMDB00209 |
| 48425 | phenylacetylcarnitine                              | Peptide                | Acetylated Peptides                   | 101724840 | 287108-21-8          |           |
| 52925 | phenylacetylglutamate                              | Peptide                | Acetylated Peptides                   | 11579826  |                      | HMDB59772 |
| 35126 | phenylacetylglutamine                              | Peptide                | Acetylated Peptides                   | 92258     | 28047-15-6           | HMDB06344 |
| 64    | phenylalanine                                      | Amino Acid             | Phenylalanine Metabolism              | 6140      | 63-91-2              | HMDB00159 |
| 22130 | phenyllactate (PLA)                                | Amino Acid             | Phenylalanine Metabolism              | 3848      | 828-01-3             | HMDB00779 |
| 566   | phenylpyruvate                                     | Amino Acid             | Phenylalanine Metabolism              | 997       | 156-06-9             | HMDB00205 |
| 42109 | phosphate                                          | Energy                 | Oxidative Phosphorylation             | 1061      | 7664-38-2            | HMDB01429 |
| 1600  | phosphoethanolamine (PE)                           | Lipid                  | Phospholipid Metabolism               | 1015      | 1071-23-4            | HMDB00224 |
| 1512  | picolinate                                         | Amino Acid             | Tryptophan Metabolism                 | 1018      | 98-98-6              | HMDB02243 |
| 15704 | pimelate (C7-DC)                                   | Lipid                  | Fatty Acid, Dicarboxylate             | 385       | 111-16-0             | HMDB00857 |
| 53224 | pimeloylcarnitine/3-methyladipoylcarnitine (C7-DC) | Lipid                  | Fatty Acid                            |           |                      |           |



|       |                                       |                        |                                                      |          |             |           |
|-------|---------------------------------------|------------------------|------------------------------------------------------|----------|-------------|-----------|
| 1444  | pipecolate                            | Amino Acid             | Metabolism(Acyl Carnitine)<br>Lysine Metabolism      | 849      | 4043-87-2   | HMDB00070 |
| 33935 | piperine                              | Xenobiotics            | Food Component/Plant                                 | 638024   | 94-62-2     | HMDB29377 |
| 54742 | prednisolone                          | Xenobiotics            | Drug - Antiinflammatory, Immunosuppressant           | 5755     |             | HMDB14998 |
| 40708 | pregnanediol-3-glucuronide            | Lipid                  | Progestin Steroids                                   | 123796   | 1852-49-9   | HMDB10318 |
| 48394 | pregnanolone/allopregnanolone sulfate | Lipid                  | Progestin Steroids                                   |          |             |           |
| 32562 | pregnen-diol disulfate*               | Lipid                  | Pregnenolone Steroids                                |          |             |           |
| 32619 | pregnenediol sulfate (C21H34O5S)*     | Lipid                  | Pregnenolone Steroids                                |          | 1247-64-9   |           |
| 62921 | pregnenetriol disulfate*              | Lipid                  | Pregnenolone Steroids                                |          |             |           |
| 62922 | pregnenetriol sulfate*                | Lipid                  | Pregnenolone Steroids                                |          |             |           |
| 38170 | pregnenolone sulfate                  | Lipid                  | Pregnenolone Steroids                                | 105074   | 1247-64-9   | HMDB00774 |
| 35127 | prolylhydroxyproline                  | Amino Acid             | Urea cycle; Arginine and Proline Metabolism          | 11673055 | 18684-24-7  | HMDB06695 |
| 1898  | proline                               | Amino Acid             | Urea cycle; Arginine and Proline Metabolism          | 145742   | 147-85-3    | HMDB00162 |
| 40703 | prolylglycine                         | Peptide                | Dipeptide                                            | 6426709  | 2578-57-6   | HMDB11178 |
| 32452 | propionylcarnitine (C3)               | Lipid                  | Fatty Acid Metabolism (also BCAA Metabolism)         | 107738   | 17298-37-2  | HMDB00824 |
| 31932 | propionylglycine (C3)                 | Lipid                  | Fatty Acid Metabolism (also BCAA Metabolism)         | 98681    | 21709-90-0  | HMDB00783 |
| 48460 | propyl 4-hydroxybenzoate sulfate      | Xenobiotics            | Benzoate Metabolism                                  |          | 162338-10-5 |           |
| 33442 | pseudouridine                         | Nucleotide             | Pyrimidine Metabolism, Uracil containing             | 15047    | 1445-07-4   | HMDB00767 |
| 1651  | pyridoxal                             | Cofactors and Vitamins | Vitamin B6 Metabolism                                | 1050     | 65-22-5     | HMDB01545 |
| 31555 | pyridoxate                            | Cofactors and Vitamins | Vitamin B6 Metabolism                                | 6723     | 82-82-6     | HMDB00017 |
| 608   | pyridoxine (Vitamin B6)               | Cofactors and Vitamins | Vitamin B6 Metabolism                                | 1054     | 58-56-0     | HMDB02075 |
| 46225 | pyroglutamine*                        | Amino Acid             | Glutamate Metabolism                                 | 134508   | 2353-44-8   |           |
| 48990 | pyruvate                              | Carbohydrate           | Glycolysis, Gluconeogenesis, and Pyruvate Metabolism | 1060     | 127-17-3    | HMDB00243 |
| 18335 | quininate                             | Xenobiotics            | Food Component/Plant                                 | 6508     | 77-95-2     | HMDB03072 |
| 1899  | quinolinate                           | Cofactors and Vitamins | Nicotinate and Nicotinamide Metabolism               | 1066     | 89-00-9     | HMDB00232 |
| 38595 | ranitidine                            | Xenobiotics            | Drug - Gastrointestinal                              | 3001055  | 66357-59-3  | HMDB01930 |
| 62485 | ranitidine N-oxide*                   | Xenobiotics            | Drug - Gastrointestinal                              | 3033888  |             |           |
| 1806  | retinol (Vitamin A)                   | Cofactors and Vitamins | Vitamin A Metabolism                                 | 445354   | 68-26-8     | HMDB00305 |
| 15772 | ribitol                               | Carbohydrate           | Pentose Metabolism                                   | 6912     | 488-81-3    | HMDB00508 |
| 27731 | ribonate (ribonolactone)              | Carbohydrate           | Pentose Metabolism                                   | 5460677  | 03/08/5336  | HMDB00867 |

|       |                                                     |              |                                                  |          |             |           |
|-------|-----------------------------------------------------|--------------|--------------------------------------------------|----------|-------------|-----------|
| 61858 | ribulonate/xylulonate*                              | Carbohydrate | Pentose Metabolism                               |          |             |           |
| 44552 | S-(3-hydroxypropyl)mercapturic acid (HPMA)          | Xenobiotics  | Chemical                                         | 3371179  | 23127-40-4  |           |
| 42370 | S-1-pyrroline-5-carboxylate                         | Amino Acid   | Glutamate Metabolism                             | 1196     | 2906-39-0   | HMDB01301 |
| 21151 | saccharin                                           | Xenobiotics  | Food Component/Plant                             | 5143     | 1981/7/2    | HMDB29723 |
| 42382 | S-adenosylhomocysteine (SAH)                        | Amino Acid   | Methionine, Cysteine, SAM and Taurine Metabolism | 439155   | 979-92-0    | HMDB00939 |
| 1515  | salicylate                                          | Xenobiotics  | Drug - Topical Agents                            | 338      | 69-72-7     | HMDB01895 |
| 33384 | salicyluric glucuronide*                            | Xenobiotics  | Drug - Analgesics, Anesthetics                   |          |             |           |
| 43239 | S-allylcysteine                                     | Xenobiotics  | Food Component/Plant                             | 98280    | 21593-77-1  | HMDB34323 |
| 1516  | sarcosine                                           | Amino Acid   | Glycine, Serine and Threonine Metabolism         | 1088     | 107-97-1    | HMDB00271 |
| 32398 | sebacate (C10-DC)                                   | Lipid        | Fatty Acid, Dicarboxylate                        | 5192     | 111-20-6    | HMDB00792 |
| 1648  | serine                                              | Amino Acid   | Glycine, Serine and Threonine Metabolism         | 5951     | 56-45-1     | HMDB00187 |
| 39592 | S-methylcysteine                                    | Amino Acid   | Methionine, Cysteine, SAM and Taurine Metabolism | 24417    | 1187-84-4   | HMDB02108 |
| 43378 | S-methylcysteine sulfoxide                          | Amino Acid   | Methionine, Cysteine, SAM and Taurine Metabolism | 82142    | 6853-87-8   | HMDB29432 |
| 38127 | S-methylmethionine                                  | Amino Acid   | Methionine, Cysteine, SAM and Taurine Metabolism | 458      | 07/12/3493  | HMDB38670 |
| 485   | spermidine                                          | Amino Acid   | Polyamine Metabolism                             | 1102     | 124-20-9    | HMDB01257 |
| 57426 | sphingadienine                                      | Lipid        | Sphingolipid Synthesis                           | 6449795  | 25696-03-1  |           |
| 17769 | sphinganine                                         | Lipid        | Sphingolipid Synthesis                           | 3126     | 3102-56-5   | HMDB00269 |
| 52605 | sphinganine-1-phosphate                             | Lipid        | Sphingolipid Synthesis                           | 520      | 19794-97-9  | HMDB01383 |
| 62152 | sphingomyelin (d17:1/14:0, d16:1/15:0)*             | Lipid        | Sphingomyelins                                   |          |             |           |
| 52433 | sphingomyelin (d17:1/16:0, d18:1/15:0, d16:1/17:0)* | Lipid        | Sphingomyelins                                   |          | 121999-58-4 |           |
| 57483 | sphingomyelin (d17:2/16:0, d18:2/15:0)*             | Lipid        | Sphingomyelins                                   |          |             |           |
| 57473 | sphingomyelin (d18:0/18:0, d19:0/17:0)*             | Lipid        | Dihydrosphingomyelins                            |          |             | HMDB12087 |
| 57476 | sphingomyelin (d18:0/20:0, d16:0/22:0)*             | Lipid        | Dihydrosphingomyelins                            |          |             |           |
| 42463 | sphingomyelin (d18:1/14:0, d16:1/16:0)*             | Lipid        | Sphingomyelins                                   | 11433862 |             | HMDB12097 |
| 52615 | sphingomyelin (d18:1/17:0, d17:1/18:0, d19:1/16:0)  | Lipid        | Sphingomyelins                                   |          | 121999-64-2 |           |
| 37529 | sphingomyelin (d18:1/18:1, d18:2/18:0)              | Lipid        | Sphingomyelins                                   | 6443882  | 108392-10-5 | HMDB12101 |
| 57475 | sphingomyelin (d18:1/19:0, d19:1/18:0)*             | Lipid        | Sphingomyelins                                   |          |             |           |
| 48490 | sphingomyelin (d18:1/20:0, d16:1/22:0)*             | Lipid        | Sphingomyelins                                   |          |             | HMDB12102 |
| 48491 | sphingomyelin (d18:1/20:1, d18:2/20:0)*             | Lipid        | Sphingomyelins                                   |          | 222403-67-0 |           |

|       |                                                                 |              |                                        |          |                       |           |
|-------|-----------------------------------------------------------------|--------------|----------------------------------------|----------|-----------------------|-----------|
| 57481 | sphingomyelin (d18:1/20:2, d18:2/20:1, d16:1/22:2)*             | Lipid        | Sphingomyelins                         |          |                       |           |
| 52495 | sphingomyelin (d18:1/21:0, d17:1/22:0, d16:1/23:0)*             | Lipid        | Sphingomyelins                         |          |                       |           |
| 48493 | sphingomyelin (d18:1/22:1, d18:2/22:0, d16:1/24:1)*             | Lipid        | Sphingomyelins                         |          |                       | HMDB12104 |
| 57477 | sphingomyelin (d18:1/22:2, d18:2/22:1, d16:1/24:2)*             | Lipid        | Sphingomyelins                         |          |                       |           |
| 47153 | sphingomyelin (d18:1/24:1, d18:2/24:0)*                         | Lipid        | Sphingomyelins                         |          | 94359-13-4            | HMDB12107 |
| 57478 | sphingomyelin (d18:1/25:0, d19:0/24:1, d20:1/23:0, d19:1/24:0)* | Lipid        | Sphingomyelins                         |          |                       |           |
| 47154 | sphingomyelin (d18:2/14:0, d18:1/14:1)*                         | Lipid        | Sphingomyelins                         |          |                       |           |
| 42459 | sphingomyelin (d18:2/16:0, d18:1/16:1)*                         | Lipid        | Sphingomyelins                         |          |                       |           |
| 57474 | sphingomyelin (d18:2/18:1)*                                     | Lipid        | Sphingomyelins                         |          |                       |           |
| 57480 | sphingomyelin (d18:2/21:0, d16:2/23:0)*                         | Lipid        | Sphingomyelins                         |          |                       |           |
| 52435 | sphingomyelin (d18:2/23:0, d18:1/23:1, d17:1/24:1)*             | Lipid        | Sphingomyelins                         |          |                       |           |
| 57482 | sphingomyelin (d18:2/23:1)*                                     | Lipid        | Sphingomyelins                         |          |                       |           |
| 52437 | sphingomyelin (d18:2/24:1, d18:1/24:2)*                         | Lipid        | Sphingomyelins                         |          |                       |           |
| 57479 | sphingomyelin (d18:2/24:2)*                                     | Lipid        | Sphingomyelins                         |          |                       |           |
| 17747 | sphingosine                                                     | Lipid        | Sphingosines                           | 5353955  | 123-78-4              | HMDB00252 |
| 34445 | sphingosine 1-phosphate                                         | Lipid        | Sphingosines                           | 5283560  | 26993-30-6            | HMDB00277 |
| 34384 | stachydrine                                                     | Xenobiotics  | Food Component/Plant                   | 115244   | 4136-37-2             | HMDB04827 |
| 37487 | stearamide (18:0)                                               | Lipid        | Fatty Acid, Amide                      | 31292    | 124-26-5              | HMDB34146 |
| 1358  | stearate (18:0)                                                 | Lipid        | Long Chain Fatty Acid                  | 5281     | 1957/11/4             | HMDB00827 |
| 33969 | stearidonate (18:4n3)                                           | Lipid        | Polyunsaturated Fatty Acid (n3 and n6) | 5312508  | 111174-40-4           | HMDB06547 |
| 19503 | stearoyl sphingomyelin (d18:1/18:0)                             | Lipid        | Sphingomyelins                         | 6453725  | 85187-10-6;85187-10-6 | HMDB01348 |
| 57450 | stearoyl-arachidonoyl-glycerol (18:0/20:4) [1]*                 | Lipid        | Diacylglycerol                         |          |                       |           |
| 57449 | stearoyl-arachidonoyl-glycerol (18:0/20:4) [2]*                 | Lipid        | Diacylglycerol                         |          |                       |           |
| 34409 | stearoylcarnitine (C18)                                         | Lipid        | Fatty Acid Metabolism(Acyl Carnitine)  | 6426855  | 18822-91-8            | HMDB00848 |
| 57464 | stearoylcholine*                                                | Lipid        | Fatty Acid Metabolism (Acyl Choline)   |          |                       |           |
| 15730 | suberate (C8-DC)                                                | Lipid        | Fatty Acid, Dicarboxylate              | 10457    | 505-48-6              | HMDB00893 |
| 52990 | suberoylcarnitine (C8-DC)                                       | Lipid        | Fatty Acid Metabolism(Acyl Carnitine)  |          |                       |           |
| 1437  | succinate                                                       | Energy       | TCA Cycle                              | 1110     | 110-15-6              | HMDB00254 |
| 41888 | succinimide                                                     | Xenobiotics  | Chemical                               | 11439    | 123-56-8              |           |
| 37058 | succinylcarnitine (C4)                                          | Energy       | TCA Cycle                              | 71464481 | 256928-74-2           | HMDB61717 |
| 1519  | sucrose                                                         | Carbohydrate | Disaccharides and                      | 5988     | 57-50-1               | HMDB00258 |

|       |                                      |                        | Oligosaccharides                                 |          |                   |           |
|-------|--------------------------------------|------------------------|--------------------------------------------------|----------|-------------------|-----------|
| 57653 | sulbactam                            | Xenobiotics            | Drug - Antibiotic                                | 130313   | 68373-14-8        |           |
| 53240 | sulfamethoxazole                     | Xenobiotics            | Drug - Antibiotic                                | 5329     |                   | HMDB15150 |
| 46960 | sulfate*                             | Xenobiotics            | Chemical                                         | 1118     | 14808-79-8        | HMDB01448 |
| 48454 | syringol sulfate                     | Xenobiotics            | Food Component/Plant                             |          | 52904-67-3        |           |
| 15336 | tartrate                             | Xenobiotics            | Food Component/Plant                             | 444305   | 87-69-4;6106-24-7 | HMDB00956 |
| 20693 | tartronate (hydroxymalonate)         | Xenobiotics            | Bacterial/Fungal                                 | 45       | 80-69-3           | HMDB35227 |
| 2125  | taurine                              | Amino Acid             | Methionine, Cysteine, SAM and Taurine Metabolism | 1123     | 107-35-7          | HMDB00251 |
| 18494 | taurochenodeoxycholate               | Lipid                  | Primary Bile Acid Metabolism                     | 387316   | 6009-98-9         | HMDB00951 |
| 62890 | taurochenodeoxycholic acid 3-sulfate | Lipid                  | Secondary Bile Acid Metabolism                   |          |                   | HMDB02486 |
| 18497 | taurocholate                         | Lipid                  | Primary Bile Acid Metabolism                     | 6675     | 145-42-6          | HMDB00036 |
| 32807 | taurocholate sulfate*                | Lipid                  | Secondary Bile Acid Metabolism                   |          |                   |           |
| 12261 | taurodeoxycholate                    | Lipid                  | Secondary Bile Acid Metabolism                   | 2733768  | 207737-97-1       | HMDB00896 |
| 62889 | taurodeoxycholic acid 3-sulfate      | Lipid                  | Secondary Bile Acid Metabolism                   |          |                   |           |
| 36850 | tauroolithocholate 3-sulfate         | Lipid                  | Secondary Bile Acid Metabolism                   | 440071   | 64936-83-0        | HMDB02580 |
| 39378 | taurooursodeoxycholate               | Lipid                  | Secondary Bile Acid Metabolism                   | 9848818  | 14605-22-2        | HMDB00874 |
| 62918 | tetradecadienedioate (C14:2-DC)*     | Lipid                  | Fatty Acid, Dicarboxylate                        |          |                   |           |
| 62850 | tetradecadienoate (14:2)*            | Lipid                  | Polyunsaturated Fatty Acid (n3 and n6)           | 5312409  | 39039-37-7        | HMDB00560 |
| 35669 | tetradecanedioate (C14)              | Lipid                  | Fatty Acid, Dicarboxylate                        | 13185    | 821-38-5          | HMDB00872 |
| 22206 | theanine                             | Xenobiotics            | Food Component/Plant                             | 439378   | 3081-61-6         | HMDB34365 |
| 18392 | theobromine                          | Xenobiotics            | Xanthine Metabolism                              | 5429     | 83-67-0           | HMDB02825 |
| 18394 | theophylline                         | Xenobiotics            | Xanthine Metabolism                              | 2153     | 58-55-9           | HMDB01889 |
| 53231 | thioprolin                           | Xenobiotics            | Chemical                                         | 93176    | 34592-47-4        |           |
| 27738 | threonate                            | Cofactors and Vitamins | Ascorbate and Aldarate Metabolism                | 151152   | 70753-61-6        | HMDB00943 |
| 1284  | threonine                            | Amino Acid             | Glycine, Serine and Threonine Metabolism         | 6288     | 72-19-5           | HMDB00167 |
| 36095 | thymol sulfate                       | Xenobiotics            | Food Component/Plant                             |          | 89-83-8           | HMDB01878 |
| 2761  | thyroxine                            | Amino Acid             | Tyrosine Metabolism                              | 5819     | 51-48-9           | HMDB01918 |
| 35428 | tiglyl carnitine (C5)                | Amino Acid             | Leucine, Isoleucine and Valine Metabolism        | 22833596 | 64191-86-2        | HMDB02366 |
| 32306 | hydroxyproline                       | Amino Acid             | Urea cycle; Arginine and Proline Metabolism      | 5810     | 51-35-4           | HMDB00725 |

|       |                                         |                        |                                                      |        |                  |           |
|-------|-----------------------------------------|------------------------|------------------------------------------------------|--------|------------------|-----------|
| 607   | trans-urocanate                         | Amino Acid             | Histidine Metabolism                                 | 736715 | 104-98-3         | HMDB00301 |
| 52436 | tricosanoyl sphingomyelin (d18:1/23:0)* | Lipid                  | Sphingomyelins                                       |        |                  | HMDB12105 |
| 62919 | tridecenedioate (C13:1-DC)*             | Lipid                  | Fatty Acid, Dicarboxylate                            |        |                  |           |
| 32401 | trigonelline (N'-methylnicotinate)      | Cofactors and Vitamins | Nicotinate and Nicotinamide Metabolism               | 5570   | 535-83-1         | HMDB00875 |
| 40406 | trimethylamine N-oxide                  | Lipid                  | Phospholipid Metabolism                              | 1145   | 1184-78-7        | HMDB00925 |
| 54    | tryptophan                              | Amino Acid             | Tryptophan Metabolism                                | 6305   | 73-22-3          | HMDB00929 |
| 37097 | tryptophan betaine                      | Amino Acid             | Tryptophan Metabolism                                | 442106 | 20671-76-5       | HMDB61115 |
| 48408 | tyramine O-sulfate                      | Amino Acid             | Tyrosine Metabolism                                  | 153005 | 30223-92-8       | HMDB06409 |
| 1299  | tyrosine                                | Amino Acid             | Tyrosine Metabolism                                  | 6057   | 60-18-4          | HMDB00158 |
| 48674 | umbelliferone sulfate                   | Xenobiotics            | Food Component/Plant                                 | 129659 | 69526-88-1       |           |
| 42395 | undecanedioate (C11-DC)                 | Lipid                  | Fatty Acid, Dicarboxylate                            | 15816  | 1852-04-6        | HMDB00888 |
| 605   | uracil                                  | Nucleotide             | Pyrimidine Metabolism, Uracil containing             | 1174   | 66-22-8          | HMDB00300 |
| 1604  | urate                                   | Nucleotide             | Purine Metabolism, (Hypo)Xanthine/Inosine containing | 1175   | 69-93-2;120K5305 | HMDB00289 |
| 1670  | urea                                    | Amino Acid             | Urea cycle; Arginine and Proline Metabolism          | 1176   | 57-13-6          | HMDB00294 |
| 606   | uridine                                 | Nucleotide             | Pyrimidine Metabolism, Uracil containing             | 6029   | 58-96-8          | HMDB00296 |
| 1605  | ursodeoxycholate                        | Lipid                  | Secondary Bile Acid Metabolism                       | 31401  | 128-13-2         | HMDB00946 |
| 33443 | valerate (5:0)                          | Lipid                  | Short Chain Fatty Acid                               | 7991   | 109-52-4         | HMDB00892 |
| 1649  | valine                                  | Amino Acid             | Leucine, Isoleucine and Valine Metabolism            | 6287   | 72-18-4          | HMDB00883 |
| 39994 | valylleucine                            | Peptide                | Dipeptide                                            | 352039 | 22906-55-4       | HMDB29131 |
| 54910 | vanillactate                            | Amino Acid             | Tyrosine Metabolism                                  | 160637 | 2475-56-1        | HMDB00913 |
| 1567  | vanillylmandelate (VMA)                 | Amino Acid             | Tyrosine Metabolism                                  | 1245   | 1955/10/7        | HMDB00291 |
| 3147  | xanthine                                | Nucleotide             | Purine Metabolism, (Hypo)Xanthine/Inosine containing | 1188   | 69-89-6          | HMDB00292 |
| 15679 | xanthurenate                            | Amino Acid             | Tryptophan Metabolism                                | 5699   | 59-007           | HMDB00881 |
| 31538 | XHWESASXXR*                             | Peptide                | Polypeptide                                          |        |                  |           |
| 57517 | ximenoylcarnitine (C26:1)*              | Lipid                  | Fatty Acid Metabolism(Acyl Carnitine)                |        |                  |           |
| 15581 | xylose                                  | Carbohydrate           | Pentose Metabolism                                   | 135191 | 609-06-3         | HMDB00098 |
| 46590 | X - 07765                               |                        |                                                      |        |                  |           |
| 46355 | X - 09789                               |                        |                                                      |        |                  |           |
| 47478 | X - 10458                               |                        |                                                      |        |                  |           |

|       |                                                   |
|-------|---------------------------------------------------|
| 32578 | X - 11261                                         |
| 46390 | X - 11308                                         |
| 49592 | X - 11315                                         |
| 46594 | X - 11372                                         |
| 46595 | X - 11378                                         |
| 46347 | X - 11381                                         |
| 46596 | X - 11407                                         |
| 46360 | X - 11441                                         |
| 46443 | X - 11442                                         |
| 46460 | X - 11444                                         |
| 46601 | X - 11470                                         |
| 46602 | X - 11478                                         |
| 47651 | X - 11491                                         |
| 46914 | X - 11522                                         |
| 46603 | X - 11530                                         |
| 47493 | X - 11632                                         |
| 33132 | X - 11787                                         |
| 33140 | X - 11795                                         |
| 46466 | X - 11843                                         |
| 46488 | X - 11847                                         |
| 46607 | X - 11849                                         |
| 46507 | X - 11850                                         |
| 46521 | X - 11852                                         |
| 47654 | X - 11858                                         |
| 47655 | X - 11861                                         |
| 46608 | X - 11880                                         |
| 46610 | X - 12007                                         |
| 46611 | X - 12013                                         |
| 47390 | X - 12015                                         |
| 47905 | X - 12026                                         |
| 46588 | X - 12063                                         |
| 46684 | X - 12093 - retired for N2-acetyl,N6-methyllysine |
| 47687 | X - 12100                                         |

|       |           |
|-------|-----------|
| 47642 | X - 12101 |
| 46932 | X - 12104 |
| 47690 | X - 12112 |
| 47695 | X - 12117 |
| 47702 | X - 12127 |
| 47909 | X - 12170 |
| 46985 | X - 12193 |
| 46612 | X - 12206 |
| 46358 | X - 12212 |
| 46613 | X - 12216 |
| 47911 | X - 12221 |
| 46614 | X - 12230 |
| 47657 | X - 12261 |
| 47914 | X - 12262 |
| 47708 | X - 12283 |
| 47917 | X - 12306 |
| 47659 | X - 12329 |
| 46615 | X - 12407 |
| 47921 | X - 12410 |
| 46616 | X - 12411 |
| 47639 | X - 12456 |
| 46620 | X - 12462 |
| 46628 | X - 12472 |
| 46621 | X - 12524 |
| 47922 | X - 12543 |
| 46510 | X - 12544 |
| 47437 | X - 12680 |
| 47719 | X - 12689 |
| 47929 | X - 12707 |
| 46973 | X - 12718 |
| 46623 | X - 12729 |
| 47937 | X - 12730 |
| 46626 | X - 12739 |

|       |           |
|-------|-----------|
| 46627 | X - 12740 |
| 47723 | X - 12753 |
| 46986 | X - 12812 |
| 46997 | X - 12822 |
| 46633 | X - 12844 |
| 46634 | X - 12846 |
| 46364 | X - 12847 |
| 46636 | X - 12849 |
| 46639 | X - 12851 |
| 47954 | X - 12879 |
| 47955 | X - 12906 |
| 47788 | X - 13431 |
| 47439 | X - 13507 |
| 47959 | X - 13553 |
| 47664 | X - 13658 |
| 47790 | X - 13684 |
| 47962 | X - 13695 |
| 47967 | X - 13726 |
| 47971 | X - 13729 |
| 47441 | X - 13737 |
| 46646 | X - 13835 |
| 47977 | X - 13844 |
| 46417 | X - 13866 |
| 46632 | X - 14056 |
| 46656 | X - 14662 |
| 46657 | X - 14939 |
| 46658 | X - 15220 |
| 46661 | X - 15245 |
| 46283 | X - 15461 |
| 46640 | X - 15469 |
| 46266 | X - 15486 |
| 46662 | X - 15492 |
| 46977 | X - 15503 |



|       |           |
|-------|-----------|
| 46664 | X - 15664 |
| 47800 | X - 15666 |
| 46666 | X - 15728 |
| 47988 | X - 16087 |
| 46461 | X - 16124 |
| 47802 | X - 16397 |
| 47013 | X - 16570 |
| 46673 | X - 16576 |
| 47804 | X - 16580 |
| 47992 | X - 16649 |
| 46677 | X - 16654 |
| 46680 | X - 16932 |
| 46681 | X - 16935 |
| 46511 | X - 16938 |
| 46683 | X - 16944 |
| 46517 | X - 16946 |
| 46685 | X - 16964 |
| 47993 | X - 17010 |
| 46686 | X - 17137 |
| 46689 | X - 17145 |
| 47806 | X - 17162 |
| 46490 | X - 17185 |
| 46704 | X - 17269 |
| 46672 | X - 17325 |
| 47820 | X - 17335 |
| 47821 | X - 17337 |
| 47872 | X - 17340 |
| 48001 | X - 17351 |
| 48009 | X - 17357 |
| 48011 | X - 17359 |
| 46976 | X - 17365 |
| 46994 | X - 17367 |
| 46705 | X - 17438 |

|       |           |
|-------|-----------|
| 48052 | X - 17612 |
| 46707 | X - 17653 |
| 46709 | X - 17654 |
| 48019 | X - 17655 |
| 48021 | X - 17673 |
| 46970 | X - 17676 |
| 48025 | X - 17685 |
| 46366 | X - 18249 |
| 47342 | X - 18345 |
| 48047 | X - 18886 |
| 48048 | X - 18888 |
| 47670 | X - 18899 |
| 46690 | X - 18901 |
| 46695 | X - 18913 |
| 46368 | X - 18914 |
| 47671 | X - 18921 |
| 46700 | X - 18922 |
| 46701 | X - 19141 |
| 47672 | X - 19183 |
| 46261 | X - 19438 |
| 46259 | X - 21258 |
| 46295 | X - 21286 |
| 46316 | X - 21295 |
| 46354 | X - 21310 |
| 46359 | X - 21315 |
| 46363 | X - 21319 |
| 46384 | X - 21339 |
| 46387 | X - 21342 |
| 46398 | X - 21353 |
| 46409 | X - 21364 |
| 46455 | X - 21410 |
| 46456 | X - 21411 |
| 46486 | X - 21441 |

|       |           |
|-------|-----------|
| 46493 | X - 21448 |
| 46512 | X - 21467 |
| 46515 | X - 21470 |
| 46516 | X - 21471 |
| 46674 | X - 21607 |
| 46730 | X - 21661 |
| 46898 | X - 21729 |
| 46902 | X - 21733 |
| 46905 | X - 21736 |
| 46961 | X - 21785 |
| 46968 | X - 21792 |
| 46972 | X - 21796 |
| 46980 | X - 21803 |
| 46984 | X - 21807 |
| 46998 | X - 21821 |
| 47006 | X - 21829 |
| 47011 | X - 21834 |
| 47205 | X - 21959 |
| 47389 | X - 22143 |
| 47417 | X - 22162 |
| 47783 | X - 22519 |
| 47784 | X - 22520 |
| 48067 | X - 22764 |
| 48076 | X - 22771 |
| 48080 | X - 22775 |
| 48081 | X - 22776 |
| 48185 | X - 22834 |
| 52659 | X - 22918 |
| 48774 | X - 23160 |
| 48892 | X - 23196 |
| 48972 | X - 23276 |
| 48993 | X - 23294 |
| 48994 | X - 23295 |

|       |           |
|-------|-----------|
| 48995 | X - 23296 |
| 48996 | X - 23297 |
| 49704 | X - 23314 |
| 49228 | X - 23369 |
| 49374 | X - 23498 |
| 49383 | X - 23507 |
| 49459 | X - 23583 |
| 49461 | X - 23585 |
| 49463 | X - 23587 |
| 49466 | X - 23590 |
| 49469 | X - 23593 |
| 49512 | X - 23636 |
| 49515 | X - 23639 |
| 49521 | X - 23644 |
| 49525 | X - 23648 |
| 49539 | X - 23662 |
| 49542 | X - 23665 |
| 49543 | X - 23666 |
| 49557 | X - 23680 |
| 49637 | X - 23739 |
| 49665 | X - 23767 |
| 49679 | X - 23780 |
| 49681 | X - 23782 |
| 49688 | X - 23787 |
| 49883 | X - 23974 |
| 52025 | X - 23997 |
| 52106 | X - 24077 |
| 52135 | X - 24106 |
| 52280 | X - 24241 |
| 52286 | X - 24243 |
| 52297 | X - 24293 |
| 52483 | X - 24295 |
| 52501 | X - 24306 |

|       |           |
|-------|-----------|
| 52502 | X - 24307 |
| 52524 | X - 24328 |
| 52533 | X - 24337 |
| 52540 | X - 24344 |
| 52640 | X - 24411 |
| 52647 | X - 24418 |
| 52636 | X - 24422 |
| 52661 | X - 24431 |
| 52662 | X - 24432 |
| 52665 | X - 24435 |
| 52772 | X - 24455 |
| 52773 | X - 24456 |
| 52779 | X - 24462 |
| 52790 | X - 24473 |
| 52792 | X - 24475 |
| 52839 | X - 24518 |
| 52848 | X - 24527 |
| 52861 | X - 24540 |
| 52863 | X - 24542 |
| 52865 | X - 24544 |
| 52867 | X - 24546 |
| 52870 | X - 24549 |
| 52877 | X - 24556 |
| 52886 | X - 24565 |
| 52892 | X - 24571 |
| 52909 | X - 24588 |
| 53023 | X - 24608 |
| 53065 | X - 24637 |
| 53114 | X - 24686 |
| 53127 | X - 24699 |
| 53156 | X - 24727 |
| 53157 | X - 24728 |
| 53172 | X - 24736 |

|       |           |
|-------|-----------|
| 53267 | X - 24748 |
| 54703 | X - 24765 |
| 54840 | X - 24812 |
| 54841 | X - 24813 |
| 54877 | X - 24849 |
| 57714 | X - 24947 |
| 57716 | X - 24949 |
| 57718 | X - 24951 |
| 57719 | X - 24952 |
| 57756 | X - 24972 |
| 62151 | X - 25172 |
| 62406 | X - 25220 |
| 62494 | X - 25265 |
| 62495 | X - 25266 |
| 62496 | X - 25267 |
| 62500 | X - 25271 |
| 62502 | X - 25273 |
| 62521 | X - 25279 |
| 62611 | X - 25318 |
| 62636 | X - 25343 |
| 62664 | X - 25371 |
| 62681 | X - 25388 |
| 62716 | X - 25419 |
| 62717 | X - 25420 |
| 62719 | X - 25422 |
| 62876 | X - 25463 |

---

Compound ID in different databases: KEGG, Kyoto Encyclopedia of Genes and Genomes; CAS, Chemical Abstracts Service; PubChem; HMDB: Human Metabolome Database.  
Abbreviation: RI, retention index.

**Supplementary Table 2. Genetic variants associated with BMI in the GIANT consortium**

| SNP        | UKB+GIANT             |      | CKB (orientated to BMI-increasing allele in CEU) |               |       |          | BBJ (orientated to BMI-increasing allele in CEU) |               |       |         |
|------------|-----------------------|------|--------------------------------------------------|---------------|-------|----------|--------------------------------------------------|---------------|-------|---------|
|            | BMI-increasing allele | EAF  | EAF                                              | SD difference | SE    | p-value  | EAF                                              | SD difference | SE    | p-value |
| rs1000096  | C                     | 0.38 | 0.19                                             | 0.001         | 0.006 | 0.913    | 0.17                                             | -0.004        | 0.005 | 0.443   |
| rs10002111 | A                     | 0.22 | 0.04                                             | 0.011         | 0.011 | 0.326    | 0.06                                             | 0.012         | 0.007 | 0.108   |
| rs1000940  | G                     | 0.28 | 0.38                                             | 0.004         | 0.004 | 0.38     | 0.58                                             | 0.009         | 0.004 | 0.016   |
| rs10044136 | G                     | 0.57 | 0.03                                             | -0.009        | 0.012 | 0.447    | 0.03                                             | 0.011         | 0.011 | 0.355   |
| rs1006893  | C                     | 0.76 | 0.71                                             | -0.019        | 0.005 | 4.54E-05 | 0.76                                             | 0.016         | 0.004 | <5E-08  |
| rs1009188  | T                     | 0.71 | 0.86                                             | 0.011         | 0.006 | 0.0682   | 0.83                                             | -0.024        | 0.005 | <5E-08  |
| rs10092723 | C                     | 0.25 | 0.23                                             | -0.004        | 0.005 | 0.387    | 0.26                                             | 0.005         | 0.004 | 0.275   |
| rs10099330 | G                     | 0.54 | 0.5                                              | -0.011        | 0.004 | 0.0113   | 0.54                                             | 0.001         | 0.004 | 0.812   |
| rs10101364 | T                     | 0.68 | 0.99                                             | 0.021         | 0.02  | 0.28     | 0.98                                             | -0.022        | 0.013 | 0.086   |
| rs10116186 | G                     | 0.46 | 0.79                                             | -0.007        | 0.005 | 0.161    | 0.8                                              | 0.01          | 0.004 | 0.029   |
| rs10132280 | C                     | 0.31 | 0.09                                             | -0.024        | 0.008 | 0.00157  | 0.07                                             | 0.018         | 0.007 | 0.01    |
| rs10197031 | C                     | 0.27 | 0.41                                             | -0.014        | 0.005 | 0.00235  | 0.54                                             | 0.009         | 0.004 | 0.015   |
| rs10198345 | C                     | 0.66 | 0.75                                             | 0.006         | 0.005 | 0.213    | 0.72                                             | -0.001        | 0.004 | 0.736   |
| rs10203386 | A                     | 0.45 | 0.43                                             | 0.034         | 0.004 | 3.78E-15 | 0.47                                             | -0.023        | 0.004 | <5E-08  |
| rs10269783 | A                     | 0.42 | 0.6                                              | 0.013         | 0.004 | 0.00208  | 0.58                                             | -0.015        | 0.004 | <5E-08  |
| rs1030015  | T                     | 0.54 | 0.34                                             | 0.012         | 0.004 | 0.0062   | 0.38                                             | -0.005        | 0.004 | 0.205   |
| rs1031670  | C                     | 0.52 | 0.47                                             | -0.008        | 0.004 | 0.0593   | 0.58                                             | 0             | 0.004 | 0.89    |
| rs1035010  | T                     | 0.25 | 0.29                                             | 0.007         | 0.005 | 0.125    | 0.28                                             | -0.023        | 0.004 | <5E-08  |
| rs1038088  | G                     | 0.49 | 0.68                                             | -0.014        | 0.005 | 0.00265  | 0.68                                             | 0.016         | 0.004 | <5E-08  |
| rs10402145 | A                     | 0.3  | 0.13                                             | 0.005         | 0.006 | 0.413    | 0.17                                             | 0.004         | 0.005 | 0.366   |
| rs1045411  | C                     | 0.28 | 0.2                                              | -0.009        | 0.005 | 0.0984   | 0.15                                             | 0.002         | 0.005 | 0.736   |
| rs1048303  | C                     | 0.58 | 0.43                                             | -0.009        | 0.004 | 0.0441   | 0.33                                             | 0.01          | 0.004 | 0.011   |
| rs10497870 | A                     | 0.61 | 0.33                                             | 0.008         | 0.004 | 0.071    | 0.3                                              | -0.003        | 0.004 | 0.385   |
| rs10498767 | G                     | 0.45 | 0.38                                             | -0.01         | 0.005 | 0.0287   | 0.4                                              | 0.008         | 0.004 | 0.033   |
| rs10498891 | T                     | 0.93 | 0.99                                             | 0.068         | 0.061 | 0.27     |                                                  | Low MAF*      |       |         |
| rs10499276 | T                     | 0.11 | 0.06                                             | 0.015         | 0.009 | 0.0963   | 0.05                                             | -0.008        | 0.009 | 0.377   |

|            |   |      |       |        |       |          |      |          |         |          |
|------------|---|------|-------|--------|-------|----------|------|----------|---------|----------|
| rs10499694 | A | 0.49 | 0.61  | 0.006  | 0.004 | 0.149    | 0.6  | -0.005   | 0.004   | 0.214    |
| rs10510419 | G | 0.15 | 0.003 | 0.05   | 0.044 | 0.263    |      | Low MAF* |         |          |
| rs10518269 | C | 0.17 | 0.001 | -0.031 | 0.022 | 0.155    |      | Low MAF* |         |          |
| rs10744146 | G | 0.54 | 0.68  | -0.013 | 0.005 | 0.00542  | 0.69 | 0.015    | 0.004   | <5E-08   |
| rs1075901  | C | 0.45 | 0.79  | -0.011 | 0.005 | 0.0276   | 0.74 | 0.011    | 0.004   | 0.53     |
| rs10761247 | G | 0.59 | 0.44  | 0.004  | 0.004 | 0.344    | 0.54 | 0.011    | 0.004   | 0.001    |
| rs10761785 | G | 0.51 | 0.66  | -0.011 | 0.004 | 0.0153   | 0.69 | 0        | 0.00393 | 0.001465 |
| rs10783779 | T | 0.6  | 0.7   | -0.001 | 0.005 | 0.812    | 0.66 | 0.002    | 0.004   | 0.593    |
| rs10792006 | T | 0.45 | 0.71  | 0.006  | 0.005 | 0.183    | 0.66 | -0.004   | 0.004   | 0.257    |
| rs10797987 | C | 0.51 | 0.32  | -0.003 | 0.005 | 0.557    | 0.38 | 0.01     | 0.004   | 0.008    |
| rs10823893 | A | 0.41 | 0.08  | 0.001  | 0.008 | 0.9      | 0.04 | -0.002   | 0.009   | 0.825    |
| rs10840606 | G | 0.82 | 0.95  | -0.023 | 0.01  | 0.0156   | 0.96 | 0.032    | 0.009   | 0.001    |
| rs10850185 | A | 0.3  | 0.4   | 0.014  | 0.004 | 0.00112  | 0.36 | -0.006   | 0.004   | 0.13     |
| rs10850777 | A | 0.44 | 0.43  | -0.004 | 0.004 | 0.368    | 0.43 | -0.01    | 0.004   | 0.005    |
| rs10858334 | G | 0.85 | 0.9   | -0.011 | 0.007 | 0.111    | 0.88 | -0.001   | 0.006   | 0.815    |
| rs10871589 | G | 0.68 | 0.64  | -0.009 | 0.004 | 0.0394   | 0.62 | 0.016    | 0.004   | <5E-08   |
| rs10886017 | A | 0.24 | 0.4   | 0.005  | 0.004 | 0.28     | 0.36 | -0.006   | 0.004   | 0.125    |
| rs10887584 | A | 0.45 | 0.27  | 0.017  | 0.005 | 0.000262 | 0.36 | -0.002   | 0.004   | 0.627    |
| rs10892873 | C | 0.36 | 0.18  | 0.009  | 0.006 | 0.0954   | 0.05 | -0.006   | 0.008   | 0.358    |
| rs10896012 | C | 0.78 | 0.85  | 0.009  | 0.006 | 0.133    | 0.82 | 0.002    | 0.005   | 0.716    |
| rs10920678 | A | 0.43 | 0.34  | 0.01   | 0.004 | 0.0219   | 0.35 | -0.021   | 0.004   | <5E-08   |
| rs10923724 | C | 0.56 | 0.6   | -0.006 | 0.004 | 0.169    | 0.61 | 0.015    | 0.004   | <5E-08   |
| rs10929925 | C | 0.41 | 0.39  | -0.016 | 0.004 | 0.00021  | 0.42 | 0.006    | 0.004   | 0.103    |
| rs10930502 | A | 0.69 | 0.31  | -0.003 | 0.005 | 0.585    | 0.29 | -0.002   | 0.004   | 0.606    |
| rs10937094 | A | 0.71 | 0.87  | 0.004  | 0.006 | 0.512    | 0.77 | -0.002   | 0.004   | 0.693    |
| rs10938397 | G | 0.57 | 0.7   | -0.037 | 0.005 | 1.45E-15 | 0.7  | 0.028    | 0.004   | <5E-08   |
| rs10942267 | A | 0.69 | 0.82  | 0.008  | 0.005 | 0.134    | 0.85 | -0.017   | 0.005   | 0.001    |
| rs10950289 | A | 0.84 | 0.76  | -0.005 | 0.005 | 0.382    | 0.76 | -0.001   | 0.005   | 0.84     |
| rs10954772 | T | 0.32 | 0.04  | -0.015 | 0.011 | 0.192    |      | Low MAF* |         |          |
| rs10965780 | G | 0.41 | 0.15  | -0.008 | 0.006 | 0.191    | 0.27 | 0.019    | 0.004   | <5E-08   |
| rs10971721 | C | 0.1  | 0.01  | 0.04   | 0.025 | 0.117    |      | Low MAF* |         |          |
| rs10984756 | G | 0.91 | 0.99  | 0.086  | 0.032 | 0.00761  |      | Low MAF* |         |          |



|             |   |      |      |        |       |          |      |          |       |        |
|-------------|---|------|------|--------|-------|----------|------|----------|-------|--------|
| rs10985968  | C | 0.5  | 0.52 | 0.003  | 0.004 | 0.531    | 0.57 | -0.002   | 0.004 | 0.673  |
| rs11001963  | T | 0.55 | 0.34 | 0.01   | 0.005 | 0.0389   | 0.35 | -0.013   | 0.004 | <5E-08 |
| rs11047132  | G | 0.92 | 0.78 | -0.002 | 0.005 | 0.656    | 0.71 | 0.007    | 0.004 | 0.078  |
| rs1106761   | A | 0.37 | 0.16 | 0      | 0.006 | 0.98     | 0.14 | -0.017   | 0.005 | 0.001  |
| rs1106908   | G | 0.45 | 0.33 | -0.016 | 0.004 | 0.000402 | 0.41 | 0.014    | 0.004 | <5E-08 |
| rs11074446  | T | 0.85 | 0.73 | 0.035  | 0.005 | 1.10E-13 | 0.72 | -0.03    | 0.005 | <5E-08 |
| rs11075489  | C | 0.47 | 0.55 | -0.009 | 0.004 | 0.0437   | 0.58 | 0.003    | 0.004 | 0.42   |
| rs11105839  | T | 0.37 | 0.5  | -0.019 | 0.004 | 2.24E-05 | 0.48 | 0.013    | 0.004 | <5E-08 |
| rs11115176  | T | 0.78 | 0.79 | 0.001  | 0.005 | 0.824    | 0.84 | -0.001   | 0.005 | 0.888  |
| rs11121210  | C | 0.34 | 0.17 | -0.003 | 0.006 | 0.57     | 0.16 | 0.01     | 0.005 | 0.039  |
| rs11126822  | A | 0.31 | 0.16 | 0.012  | 0.006 | 0.0359   | 0.2  | -0.002   | 0.004 | 0.685  |
| rs11138313  | A | 0.9  | 0.99 | -0.009 | 0.053 | 0.865    |      | Low MAF* |       |        |
| rs11158434  | A | 0.2  | 0.42 | 0.003  | 0.004 | 0.485    | 0.55 | -0.003   | 0.004 | 0.331  |
| rs11170468  | A | 0.78 | 0.99 | 0.026  | 0.021 | 0.204    |      | Low MAF* |       |        |
| rs11181001  | A | 0.48 | 0.41 | 0.002  | 0.004 | 0.629    | 0.4  | -0.008   | 0.004 | 0.029  |
| rs11185111  | G | 0.29 | 0.47 | -0.004 | 0.004 | 0.406    | 0.5  | 0.008    | 0.004 | 0.018  |
| rs1119950   | G | 0.57 | 0.3  | -0.015 | 0.005 | 0.00121  | 0.45 | 0.006    | 0.004 | 0.12   |
| rs11218510  | G | 0.39 | 0.28 | -0.006 | 0.005 | 0.233    | 0.26 | 0.008    | 0.004 | 0.049  |
| rs112566467 | T | 0.21 | 0.19 | 0.012  | 0.005 | 0.0207   | 0.17 | -0.008   | 0.005 | 0.12   |
| rs113397893 | G | 0.92 | 0.99 | -0.144 | 0.096 | 0.131    |      | Low MAF* |       |        |
| rs11525873  | T | 0.9  | 0.75 | 0.02   | 0.005 | 6.56E-05 | 0.64 | -0.013   | 0.004 | 0.001  |
| rs11577094  | T | 0.08 | 0.01 | 0.009  | 0.024 | 0.697    |      | Low MAF* |       |        |
| rs11608710  | G | 0.94 | 0.99 | -0.329 | 0.141 | 0.0191   |      | Low MAF* |       |        |
| rs11611246  | T | 0.2  | 0.33 | 0.014  | 0.005 | 0.0016   | 0.3  | -0.002   | 0.004 | 0.565  |
| rs11629783  | C | 0.77 | 0.86 | 0.009  | 0.006 | 0.146    | 0.93 | -0.026   | 0.007 | <5E-08 |
| rs11633626  | C | 0.63 | 0.68 | -0.007 | 0.004 | 0.107    | 0.72 | 0.006    | 0.004 | 0.101  |
| rs11636611  | T | 0.5  | 0.8  | 0.007  | 0.005 | 0.193    | 0.82 | -0.003   | 0.005 | 0.482  |
| rs11638950  | A | 0.59 | 0.71 | 0.008  | 0.005 | 0.0818   | 0.71 | -0.006   | 0.004 | 0.137  |
| rs11649864  | A | 0.09 | 0.01 | 0.037  | 0.031 | 0.229    |      | Low MAF* |       |        |
| rs11655587  | C | 0.36 | 0.17 | -0.011 | 0.006 | 0.0537   | 0.17 | 0.014    | 0.005 | 0.005  |
| rs11672660  | C | 0.19 | 0.19 | -0.024 | 0.005 | 6.43E-06 | 0.23 | 0.025    | 0.004 | <5E-08 |
| rs1167821   | T | 0.55 | 0.95 | -0.02  | 0.01  | 0.0408   |      | Low MAF* |       |        |

|            |   |      |        |        |       |          |      |          |       |       |
|------------|---|------|--------|--------|-------|----------|------|----------|-------|-------|
| rs11692326 | T | 0.23 | 0.11   | 0.022  | 0.007 | 0.00125  | 0.16 | -0.016   | 0.005 | 0.001 |
| rs11702843 | A | 0.25 | 0.03   | 0.008  | 0.012 | 0.52     | 0.03 | -0.004   | 0.011 | 0.753 |
| rs11739877 | T | 0.62 | 0.55   | -0.003 | 0.004 | 0.415    | 0.6  | -0.001   | 0.004 | 0.758 |
| rs11757278 | T | 0.7  | 0.38   | 0.011  | 0.004 | 0.0105   | 0.49 | -0.009   | 0.004 | 0.008 |
| rs11761528 | C | 0.09 | 0.0001 | -0.033 | 0.059 | 0.571    |      | Low MAF* |       |       |
| rs11781222 | T | 0.85 | 0.72   | 0.001  | 0.005 | 0.805    | 0.7  | -0.008   | 0.004 | 0.038 |
| rs11836108 | A | 0.3  | 0.19   | 0.01   | 0.005 | 0.0655   | 0.17 | -0.011   | 0.005 | 0.027 |
| rs11856579 | G | 0.26 | 0.03   | -0.006 | 0.013 | 0.644    | 0.01 | 0.017    | 0.018 | 0.337 |
| rs11866815 | C | 0.26 | 0.21   | -0.011 | 0.005 | 0.0314   | 0.2  | 0        | 0.004 | 0.963 |
| rs1187352  | C | 0.34 | 0.18   | -0.013 | 0.005 | 0.0188   | 0.17 | 0.01     | 0.005 | 0.039 |
| rs11874040 | A | 0.71 | 0.49   | 0.006  | 0.004 | 0.136    | 0.57 | -0.008   | 0.004 | 0.025 |
| rs11915371 | C | 0.8  | 0.93   | 0.009  | 0.008 | 0.245    | 0.97 | 0.006    | 0.01  | 0.567 |
| rs11931941 | A | 0.22 | 0.39   | 0.011  | 0.004 | 0.015    | 0.36 | 0.0001   | 0.004 | 0.934 |
| rs11971098 | G | 0.91 | 0.99   | -0.022 | 0.032 | 0.496    |      | Low MAF* |       |       |
| rs1199334  | A | 0.19 | 0.03   | 0.027  | 0.012 | 0.0308   | 0.04 | -0.024   | 0.009 | 0.01  |
| rs11997238 | G | 0.91 | 0.83   | -0.011 | 0.006 | 0.0532   | 0.84 | 0.012    | 0.005 | 0.012 |
| rs12022461 | G | 0.17 | 0.21   | -0.015 | 0.005 | 0.00347  | 0.15 | 0.013    | 0.005 | 0.008 |
| rs12049202 | T | 0.19 | 0.36   | -0.005 | 0.004 | 0.293    | 0.39 | -0.005   | 0.004 | 0.212 |
| rs12072739 | G | 0.78 | 0.92   | 0.009  | 0.007 | 0.241    | 0.97 | 0.013    | 0.01  | 0.205 |
| rs12098284 | T | 0.12 | 0.13   | -0.004 | 0.006 | 0.499    | 0.12 | -0.004   | 0.006 | 0.468 |
| rs12121950 | T | 0.34 | 0.76   | 0.009  | 0.005 | 0.0652   | 0.65 | -0.013   | 0.004 | 0.001 |
| rs12147845 | T | 0.11 | 0.0001 | 0.006  | 0.039 | 0.875    |      | Low MAF* |       |       |
| rs12151152 | G | 0.41 | 0.31   | -0.027 | 0.005 | 9.49E-09 |      | Low MAF* |       |       |
| rs12193797 | A | 0.87 | 0.99   | -0.017 | 0.022 | 0.431    |      | Low MAF* |       |       |
| rs12206094 | C | 0.29 | 0.2    | -0.02  | 0.005 | 0.000148 | 0.17 | 0.015    | 0.005 | 0.002 |
| rs12209887 | A | 0.46 | 0.29   | 0.019  | 0.005 | 4.50E-05 | 0.27 | -0.004   | 0.004 | 0.359 |
| rs12222235 | C | 0.33 | 0.16   | -0.014 | 0.006 | 0.0182   | 0.09 | 0.002    | 0.006 | 0.725 |
| rs12238336 | C | 0.38 | 0.43   | -0.004 | 0.004 | 0.299    | 0.34 | 0.001    | 0.004 | 0.703 |
| rs12282785 | C | 0.22 | 0.17   | 0.003  | 0.006 | 0.615    | 0.15 | 0.004    | 0.005 | 0.427 |
| rs12286929 | G | 0.5  | 0.73   | -0.01  | 0.005 | 0.027    | 0.8  | 0.015    | 0.005 | 0.001 |
| rs12316047 | G | 0.24 | 0.01   | -0.057 | 0.05  | 0.252    |      | Low MAF* |       |       |
| rs12321904 | T | 0.5  | 0.24   | 0      | 0.005 | 0.978    | 0.23 | -0.005   | 0.004 | 0.221 |

|            |   |      |        |        |       |          |      |        |          |          |
|------------|---|------|--------|--------|-------|----------|------|--------|----------|----------|
| rs12336441 | A | 0.62 | 0.99   | -0.008 | 0.027 | 0.775    |      |        | Low MAF* |          |
| rs12364470 | G | 0.85 | 0.99   | -0.049 | 0.027 | 0.0646   |      |        | Low MAF* |          |
| rs12422552 | G | 0.27 | 0.3    | 0.001  | 0.005 | 0.812    | 0.24 | -0.006 | 0.004    | 0.152    |
| rs12429545 | A | 0.12 | 0.25   | 0.034  | 0.005 | 1.97E-12 | 0.22 | -0.031 | 0.004    | <5E-08   |
| rs12431682 | C | 0.34 | 0.46   | -0.003 | 0.004 | 0.501    | 0.49 | 0.009  | 0.004    | 0.014    |
| rs12438629 | C | 0.97 | 0.87   | 0.024  | 0.006 | 0.000127 | 0.85 | -0.018 | 0.005    | <5E-08   |
| rs12439798 | T | 0.44 | 0.3    | 0.007  | 0.005 | 0.157    | 0.3  | -0.009 | 0.004    | 0.023    |
| rs12446632 | G | 0.14 | 0.0001 | -0.123 | 0.071 | 0.0834   |      |        | Low MAF* |          |
| rs12448257 | A | 0.22 | 0.28   | 0.029  | 0.005 | 1.29E-09 | 0.3  | -0.023 | 0.004    | <5E-08   |
| rs12449219 | G | 0.86 | 0.92   | -0.022 | 0.008 | 0.00469  | 0.88 | 0.007  | 0.006    | 0.21     |
| rs12449442 | A | 0.22 | 0.61   | 0.019  | 0.004 | 9.08E-06 | 0.7  | -0.021 | 0.004    | <5E-08   |
| rs12454712 | C | 0.62 | 0.55   | -0.016 | 0.004 | 0.000168 | 0.52 | 0.019  | 0.004    | <5E-08   |
| rs12462975 | A | 0.32 | 0.19   | 0.004  | 0.006 | 0.437    | 0.23 | -0.009 | 0.004    | 0.037    |
| rs12470698 | A | 0.57 | 0.8    | 0.01   | 0.005 | 0.0636   | 0.77 | -0.011 | 0.004    | 0.016    |
| rs12488237 | C | 0.94 | 0.94   | 0.003  | 0.008 | 0.737    | 0.93 | 0.012  | 0.007    | 0.1      |
| rs12509234 | C | 0.72 | 0.63   | -0.009 | 0.004 | 0.0377   | 0.94 | 0.0001 | 0.00371  | 0.009134 |
| rs12522567 | T | 0.49 | 0.17   | 0.007  | 0.006 | 0.236    | 0.15 | -0.007 | 0.005    | 0.165    |
| rs12546331 | T | 0.51 | 0.6    | 0.005  | 0.004 | 0.267    | 0.63 | -0.014 | 0.004    | <5E-08   |
| rs12551906 | G | 0.29 | 0.09   | -0.001 | 0.007 | 0.838    | 0.1  | 0.01   | 0.006    | 0.097    |
| rs12628051 | T | 0.64 | 0.6    | 0.018  | 0.004 | 3.23E-05 | 0.53 | -0.024 | 0.004    | <5E-08   |
| rs12628891 | C | 0.32 | 0.46   | -0.003 | 0.004 | 0.514    | 0.41 | 0.002  | 0.004    | 0.613    |
| rs12635553 | A | 0.49 | 0.92   | 0.007  | 0.008 | 0.399    | 0.85 | -0.003 | 0.005    | 0.563    |
| rs1263627  | T | 0.76 | 0.59   | -0.008 | 0.004 | 0.0599   | 0.68 | 0.006  | 0.004    | 0.114    |
| rs12651833 | C | 0.81 | 0.57   | 0.002  | 0.004 | 0.658    | 0.42 | -0.007 | 0.004    | 0.046    |
| rs12680842 | A | 0.68 | 0.51   | 0.013  | 0.004 | 0.00312  | 0.5  | -0.019 | 0.004    | <5E-08   |
| rs12681792 | A | 0.2  | 0.28   | 0.007  | 0.005 | 0.151    | 0.31 | -0.001 | 0.004    | 0.759    |
| rs1269175  | A | 0.51 | 0.86   | 0.011  | 0.006 | 0.0873   | 0.81 | -0.009 | 0.005    | 0.047    |
| rs12692596 | T | 0.36 | 0.26   | -0.003 | 0.005 | 0.519    | 0.34 | 0.003  | 0.004    | 0.374    |
| rs12705916 | C | 0.62 | 0.71   | -0.005 | 0.005 | 0.277    | 0.69 | 0.007  | 0.004    | 0.086    |
| rs12714199 | C | 0.61 | 0.79   | -0.01  | 0.005 | 0.0423   | 0.67 | 0.004  | 0.004    | 0.334    |
| rs12765914 | T | 0.08 | 0.25   | 0.016  | 0.005 | 0.00149  | 0.18 | -0.016 | 0.005    | 0.001    |
| rs1277733  | T | 0.77 | 0.76   | 0.014  | 0.005 | 0.00425  | 0.66 | -0.017 | 0.004    | <5E-08   |

|            |   |      |      |        |       |          |      |          |       |        |
|------------|---|------|------|--------|-------|----------|------|----------|-------|--------|
| rs1285245  | G | 0.39 | 0.34 | -0.014 | 0.004 | 0.0015   | 0.33 | 0.018    | 0.004 | <5E-08 |
| rs12868881 | A | 0.41 | 0.41 | 0.013  | 0.004 | 0.00259  | 0.39 | -0.003   | 0.004 | 0.352  |
| rs12885454 | C | 0.36 | 0.56 | -0.013 | 0.004 | 0.0019   | 0.52 | 0.001    | 0.004 | 0.848  |
| rs12889085 | G | 0.58 | 0.81 | -0.009 | 0.005 | 0.0993   | 0.83 | 0.007    | 0.005 | 0.149  |
| rs12890931 | G | 0.63 | 0.36 | -0.002 | 0.004 | 0.572    | 0.38 | 0.002    | 0.004 | 0.646  |
| rs12899905 | C | 0.26 | 0.04 | -0.017 | 0.011 | 0.115    | 0.03 | 0.027    | 0.011 | 0.01   |
| rs12912380 | C | 0.11 | 0.05 | -0.014 | 0.01  | 0.165    | 0.03 | 0.014    | 0.011 | 0.196  |
| rs12914623 | G | 0.27 | 0.14 | -0.002 | 0.006 | 0.767    | 0.14 | 0.012    | 0.006 | 0.035  |
| rs12922346 | C | 0.26 | 0.16 | 0.014  | 0.006 | 0.0153   | 0.2  | 0.014    | 0.005 | 0.003  |
| rs12939549 | A | 0.56 | 0.7  | 0.02   | 0.005 | 1.39E-05 | 0.65 | -0.008   | 0.004 | 0.041  |
| rs13002946 | T | 0.27 | 0.55 | 0      | 0.004 | 0.915    | 0.46 | 0.002    | 0.004 | 0.59   |
| rs13021737 | G | 0.16 | 0.09 | -0.082 | 0.007 | 4.38E-28 | 0.1  | 0.049    | 0.006 | <5E-08 |
| rs13033310 | A | 0.25 | 0.31 | 0.007  | 0.005 | 0.139    | 0.31 | 0.004    | 0.004 | 0.241  |
| rs13062093 | G | 0.63 | 0.85 | 0.005  | 0.006 | 0.442    | 0.85 | -0.003   | 0.005 | 0.573  |
| rs13110266 | G | 0.4  | 0.51 | 0.001  | 0.004 | 0.771    | 0.45 | 0.0001   | 0.004 | 0.975  |
| rs13155259 | G | 0.67 | 0.9  | 0.007  | 0.007 | 0.332    | 0.92 | 0.0001   | 0.007 | 0.962  |
| rs13174863 | G | 0.85 | 0.95 | -0.003 | 0.01  | 0.794    | 0.94 | 0.025    | 0.008 | 0.001  |
| rs13191362 | A | 0.86 | 0.99 | 0.017  | 0.056 | 0.768    |      | Low MAF* |       |        |
| rs1320251  | C | 0.46 | 0.58 | -0.012 | 0.004 | 0.00743  | 0.66 | 0.013    | 0.004 | 0.001  |
| rs13209872 | G | 0.35 | 0.45 | 0      | 0.004 | 0.995    | 0.36 | 0.009    | 0.004 | 0.018  |
| rs13264909 | A | 0.57 | 0.34 | 0      | 0.004 | 0.955    | 0.28 | -0.001   | 0.004 | 0.89   |
| rs13298062 | A | 0.81 | 0.99 | 0.031  | 0.02  | 0.12     | 0.94 | -0.008   | 0.007 | 0.288  |
| rs13299788 | C | 0.85 | 0.83 | 0.002  | 0.006 | 0.774    | 0.8  | -0.015   | 0.004 | <5E-08 |
| rs13303252 | T | 0.18 | 0.4  | 0.004  | 0.004 | 0.316    | 0.36 | 0.003    | 0.004 | 0.403  |
| rs13417156 | C | 0.42 | 0.34 | -0.007 | 0.004 | 0.139    | 0.29 | 0.005    | 0.004 | 0.172  |
| rs13432055 | C | 0.71 | 0.95 | -0.009 | 0.01  | 0.352    | 0.95 | 0.017    | 0.009 | 0.053  |
| rs1346841  | G | 0.41 | 0.55 | -0.012 | 0.004 | 0.008    | 0.6  | 0.007    | 0.004 | 0.07   |
| rs1355459  | A | 0.32 | 0.09 | -0.002 | 0.008 | 0.783    | 0.04 | -0.01    | 0.009 | 0.23   |
| rs1356506  | T | 0.63 | 0.5  | 0.019  | 0.004 | 9.61E-06 | 0.61 | -0.017   | 0.004 | <5E-08 |
| rs1363695  | C | 0.24 | 0.21 | -0.006 | 0.005 | 0.241    | 0.16 | 0.0001   | 0.005 | 0.993  |
| rs1383592  | A | 0.21 | 0.22 | 0.005  | 0.005 | 0.377    | 0.14 | -0.004   | 0.005 | 0.426  |
| rs1394879  | C | 0.4  | 0.12 | 0.006  | 0.006 | 0.385    | 0.05 | -0.016   | 0.008 | 0.042  |

|           |   |      |      |        |       |          |      |          |       |        |
|-----------|---|------|------|--------|-------|----------|------|----------|-------|--------|
| rs1409818 | T | 0.11 | 0.15 | 0.011  | 0.006 | 0.0735   | 0.13 | -0.011   | 0.005 | 0.036  |
| rs1411431 | A | 0.16 | 0.27 | 0.011  | 0.005 | 0.0211   | 0.35 | -0.016   | 0.004 | <5E-08 |
| rs1417665 | T | 0.8  | 0.9  | 0.005  | 0.007 | 0.506    | 0.95 | 0.002    | 0.008 | 0.839  |
| rs1426652 | A | 0.17 | 0.31 | 0.021  | 0.005 | 6.92E-06 | 0.32 | -0.004   | 0.004 | 0.277  |
| rs1431659 | A | 0.27 | 0.31 | 0.001  | 0.005 | 0.893    | 0.29 | -0.009   | 0.004 | 0.026  |
| rs1436344 | C | 0.57 | 0.36 | 0.004  | 0.004 | 0.337    | 0.35 | -0.011   | 0.004 | 0.004  |
| rs1437842 | G | 0.49 | 0.31 | -0.002 | 0.005 | 0.6      | 0.33 | 0.011    | 0.004 | 0.003  |
| rs1451077 | G | 0.42 | 0.41 | -0.007 | 0.004 | 0.118    | 0.32 | 0.006    | 0.004 | 0.122  |
| rs1451109 | G | 0.68 | 0.54 | -0.002 | 0.004 | 0.641    | 0.47 | 0.002    | 0.004 | 0.592  |
| rs1452075 | T | 0.73 | 0.71 | 0.007  | 0.005 | 0.119    | 0.8  | 0.001    | 0.004 | 0.289  |
| rs1460676 | C | 0.82 | 0.62 | -0.005 | 0.004 | 0.23     | 0.6  | 0.009    | 0.004 | 0.015  |
| rs1470545 | T | 0.04 | 0.01 | 0.037  | 0.038 | 0.327    |      | Low MAF* |       |        |
| rs1471212 | A | 0.47 | 0.91 | -0.003 | 0.007 | 0.652    | 0.96 | -0.007   | 0.009 | 0.44   |
| rs1477890 | G | 0.49 | 0.5  | -0.004 | 0.004 | 0.318    | 0.47 | 0.007    | 0.004 | 0.044  |
| rs1481012 | A | 0.89 | 0.71 | 0.012  | 0.005 | 0.0109   | 0.7  | -0.012   | 0.004 | 0.002  |
| rs1491905 | T | 0.53 | 0.74 | 0.011  | 0.005 | 0.0212   | 0.7  | -0.011   | 0.004 | 0.005  |
| rs1501673 | A | 0.14 | 0.49 | 0.023  | 0.004 | 4.18E-08 | 0.44 | -0.02    | 0.004 | <5E-08 |
| rs1506662 | A | 0.53 | 0.62 | 0.005  | 0.004 | 0.26     | 0.66 | -0.002   | 0.004 | 0.658  |
| rs1514177 | C | 0.43 | 0.77 | 0.032  | 0.005 | 1.01E-10 | 0.83 | -0.017   | 0.005 | <5E-08 |
| rs1522569 | T | 0.82 | 0.99 | 0.037  | 0.032 | 0.256    |      | Low MAF* |       |        |
| rs1523768 | G | 0.67 | 0.83 | -0.011 | 0.006 | 0.0556   | 0.82 | -0.002   | 0.005 | 0.675  |
| rs1536053 | C | 0.31 | 0.05 | 0.016  | 0.01  | 0.106    | 0.02 | 0.018    | 0.011 | 0.108  |
| rs1541777 | G | 0.54 | 0.85 | -0.004 | 0.006 | 0.485    | 0.88 | 0.008    | 0.005 | 0.145  |
| rs1546924 | T | 0.5  | 0.34 | 0.002  | 0.005 | 0.695    | 0.38 | -0.007   | 0.004 | 0.079  |
| rs1554194 | C | 0.5  | 0.53 | 0.023  | 0.004 | 6.27E-08 | 0.5  | 0.009    | 0.004 | 0.019  |
| rs1561554 | G | 0.61 | 0.92 | -0.006 | 0.007 | 0.416    | 0.94 | 0.004    | 0.008 | 0.593  |
| rs1580099 | C | 0.58 | 0.68 | -0.013 | 0.005 | 0.00305  | 0.74 | 0.014    | 0.004 | 0.001  |
| rs1582931 | G | 0.47 | 0.6  | -0.022 | 0.004 | 4.66E-07 | 0.53 | 0.017    | 0.004 | 0.511  |
| rs159032  | T | 0.23 | 0.13 | 0.004  | 0.006 | 0.542    | 0.18 | 0.005    | 0.005 | 0.303  |
| rs1601817 | C | 0.31 | 0.16 | -0.003 | 0.006 | 0.563    | 0.13 | 0.011    | 0.005 | 0.034  |
| rs1634350 | A | 0.44 | 0.7  | 0.016  | 0.005 | 0.000756 | 0.64 | -0.008   | 0.004 | 0.039  |
| rs1635853 | G | 0.41 | 0.33 | -0.01  | 0.004 | 0.0227   | 0.3  | -0.003   | 0.004 | 0.502  |

|            |   |      |       |        |       |          |      |          |       |        |
|------------|---|------|-------|--------|-------|----------|------|----------|-------|--------|
| rs1658820  | T | 0.24 | 0.38  | 0.014  | 0.004 | 0.00226  | 0.29 | -0.013   | 0.004 | 0.001  |
| rs16834431 | T | 0.21 | 0.01  | -0.019 | 0.03  | 0.518    |      | Low MAF* |       |        |
| rs16851483 | T | 0.07 | 0.24  | 0.025  | 0.005 | 4.90E-07 | 0.29 | -0.016   | 0.004 | <5E-08 |
| rs16882001 | G | 0.95 | 0.96  | -0.021 | 0.01  | 0.0317   | 0.98 | 0.006    | 0.011 | 0.606  |
| rs16906845 | G | 0.06 | 0.12  | -0.018 | 0.006 | 0.0043   | 0.15 | 0.016    | 0.005 | 0.002  |
| rs16907751 | C | 0.09 | 0.19  | -0.016 | 0.005 | 0.00238  | 0.14 | 0.028    | 0.005 | <5E-08 |
| rs16940823 | C | 0.17 | 0.09  | 0.001  | 0.007 | 0.845    | 0.09 | -0.001   | 0.006 | 0.836  |
| rs16978350 | G | 0.28 | 0.11  | 0.008  | 0.007 | 0.221    | 0.12 | 0.01     | 0.005 | 0.066  |
| rs16989232 | A | 0.39 | 0.52  | -0.001 | 0.004 | 0.823    | 0.42 | -0.002   | 0.004 | 0.509  |
| rs17001561 | A | 0.15 | 0.02  | 0.003  | 0.014 | 0.82     | 0.01 | 0.008    | 0.018 | 0.644  |
| rs17014375 | G | 0.87 | 0.87  | -0.006 | 0.006 | 0.295    | 0.88 | 0.008    | 0.006 | 0.158  |
| rs17019336 | T | 0.23 | 0.35  | -0.01  | 0.004 | 0.0215   | 0.27 | 0.011    | 0.004 | 0.006  |
| rs1707322  | G | 0.32 | 0.3   | -0.014 | 0.005 | 0.0019   | 0.32 | 0.004    | 0.004 | 0.354  |
| rs17105272 | T | 0.32 | 0.47  | 0.011  | 0.004 | 0.0109   | 0.43 | -0.011   | 0.004 | 0.003  |
| rs17193211 | C | 0.07 | 0.07  | -0.018 | 0.008 | 0.0326   | 0.07 | 0.013    | 0.008 | 0.092  |
| rs17201143 | C | 0.31 | 0.48  | -0.004 | 0.004 | 0.411    | 0.44 | 0.013    | 0.004 | <5E-08 |
| rs1721447  | G | 0.51 | 0.22  | -0.001 | 0.005 | 0.848    | 0.32 | 0.002    | 0.004 | 0.553  |
| rs17276464 | T | 0.41 | 0.02  | -0.005 | 0.016 | 0.751    |      | Low MAF* |       |        |
| rs1730859  | G | 0.65 | 0.74  | -0.004 | 0.005 | 0.451    | 0.72 | 0.006    | 0.004 | 0.158  |
| rs17405819 | T | 0.68 | 0.55  | 0.023  | 0.004 | 6.40E-08 | 0.39 | -0.021   | 0.004 | <5E-08 |
| rs17425707 | C | 0.9  | 0.99  | -0.03  | 0.043 | 0.489    |      | Low MAF* |       |        |
| rs17448885 | C | 0.65 | 0.57  | 0.012  | 0.004 | 0.00672  | 0.62 | -0.006   | 0.004 | 0.096  |
| rs17522122 | T | 0.47 | 0.36  | 0.012  | 0.004 | 0.00555  | 0.35 | -0.01    | 0.004 | 0.014  |
| rs17535749 | A | 0.11 | 0.001 | 0.075  | 0.068 | 0.27     |      | Low MAF* |       |        |
| rs17551974 | C | 0.19 | 0.19  | -0.013 | 0.005 | 0.0141   | 0.19 | 0.008    | 0.005 | 0.069  |
| rs17574378 | T | 0.73 | 0.85  | 0.009  | 0.006 | 0.138    | 0.84 | -0.007   | 0.005 | 0.122  |
| rs17609108 | C | 0.85 | 0.85  | -0.011 | 0.006 | 0.0552   | 0.81 | -0.011   | 0.005 | 0.019  |
| rs17636031 | C | 0.72 | 0.98  | -0.018 | 0.019 | 0.35     |      | Low MAF* |       |        |
| rs17681451 | G | 0.08 | 0.01  | 0.032  | 0.029 | 0.262    |      | Low MAF* |       |        |
| rs17720922 | T | 0.19 | 0.08  | 0.001  | 0.008 | 0.857    | 0.11 | 0.002    | 0.006 | 0.773  |
| rs17757975 | T | 0.85 | 0.99  | 0.006  | 0.028 | 0.836    |      | Low MAF* |       |        |
| rs17806224 | G | 0.18 | 0.15  | -0.012 | 0.006 | 0.0479   | 0.14 | 0.011    | 0.005 | 0.033  |

|           |   |      |        |        |       |          |      |          |       |        |
|-----------|---|------|--------|--------|-------|----------|------|----------|-------|--------|
| rs1819844 | A | 0.17 | 0.28   | 0.019  | 0.005 | 8.24E-05 | 0.19 | -0.013   | 0.005 | 0.006  |
| rs1852006 | G | 0.38 | 0.44   | -0.028 | 0.004 | 6.50E-11 | 0.43 | 0.014    | 0.004 | <5E-08 |
| rs1871329 | G | 0.76 | 0.71   | -0.008 | 0.005 | 0.106    | 0.68 | -0.006   | 0.004 | 0.136  |
| rs1876359 | T | 0.37 | 0.35   | 0      | 0.004 | 0.951    | 0.42 | -0.007   | 0.004 | 0.044  |
| rs1877875 | C | 0.43 | 0.3    | -0.009 | 0.005 | 0.0534   | 0.34 | 0.002    | 0.004 | 0.64   |
| rs1884389 | C | 0.44 | 0.8    | 0.015  | 0.005 | 0.00413  | 0.67 | 0.01     | 0.004 | 0.008  |
| rs1884429 | T | 0.23 | 0.07   | 0.019  | 0.008 | 0.0258   | 0.06 | -0.011   | 0.008 | 0.163  |
| rs1884897 | G | 0.37 | 0.14   | -0.021 | 0.006 | 0.000737 | 0.09 | 0.014    | 0.006 | 0.024  |
| rs1891215 | C | 0.54 | 0.66   | 0.004  | 0.004 | 0.426    | 0.53 | 0.003    | 0.004 | 0.491  |
| rs1899689 | T | 0.39 | 0.5    | 0.01   | 0.004 | 0.0141   | 0.41 | -0.01    | 0.004 | 0.005  |
| rs1911746 | T | 0.21 | 0.26   | -0.006 | 0.005 | 0.246    | 0.34 | -0.008   | 0.004 | 0.045  |
| rs1916801 | A | 0.62 | 0.43   | 0.003  | 0.004 | 0.491    | 0.31 | -0.011   | 0.004 | 0.009  |
| rs1927790 | C | 0.61 | 0.66   | -0.016 | 0.004 | 0.000294 | 0.58 | 0.01     | 0.004 | 0.005  |
| rs1928295 | T | 0.57 | 0.63   | 0.012  | 0.004 | 0.00771  | 0.56 | -0.015   | 0.004 | <5E-08 |
| rs1941697 | A | 0.45 | 0.8    | 0.002  | 0.005 | 0.765    | 0.76 | -0.013   | 0.004 | 0.001  |
| rs194809  | A | 0.19 | 0.27   | 0.004  | 0.005 | 0.406    | 0.19 | -0.012   | 0.005 | 0.009  |
| rs1951455 | C | 0.28 | 0.11   | -0.01  | 0.007 | 0.167    | 0.12 | 0.004    | 0.007 | 0.56   |
| rs1954494 | T | 0.56 | 0.48   | 0.007  | 0.004 | 0.129    | 0.49 | -0.003   | 0.004 | 0.343  |
| rs1967772 | G | 0.27 | 0.06   | -0.002 | 0.009 | 0.837    | 0.03 | 0.031    | 0.01  | 0.002  |
| rs1982350 | G | 0.64 | 0.62   | 0.004  | 0.005 | 0.354    | 0.67 | 0.007    | 0.004 | 0.065  |
| rs1982441 | T | 0.13 | 0.0001 | 0.069  | 0.042 | 0.0993   |      | Low MAF* |       |        |
| rs1987960 | C | 0.05 | 0.0001 | -0.304 | 0.155 | 0.0499   |      | Low MAF* |       |        |
| rs1990573 | G | 0.31 | 0.34   | 0.005  | 0.005 | 0.255    | 0.46 | 0.005    | 0.004 | 0.203  |
| rs1996120 | G | 0.59 | 0.65   | -0.03  | 0.004 | 2.38E-11 | 0.65 | 0.007    | 0.004 | 0.066  |
| rs2012502 | A | 0.38 | 0.18   | 0.013  | 0.006 | 0.0171   | 0.19 | -0.013   | 0.005 | 0.006  |
| rs2033529 | G | 0.73 | 0.81   | -0.006 | 0.005 | 0.266    | 0.7  | 0.011    | 0.004 | 0.006  |
| rs2044469 | G | 0.66 | 0.77   | -0.006 | 0.005 | 0.218    | 0.73 | 0.004    | 0.004 | 0.281  |
| rs2051559 | C | 0.86 | 0.85   | -0.003 | 0.006 | 0.554    | 0.8  | -0.001   | 0.004 | 0.831  |
| rs2053682 | A | 0.68 | 0.83   | 0.008  | 0.006 | 0.132    | 0.91 | -0.011   | 0.006 | 0.07   |
| rs2058527 | G | 0.27 | 0.28   | -0.014 | 0.005 | 0.00316  | 0.33 | 0.003    | 0.004 | 0.49   |
| rs2063177 | A | 0.35 | 0.11   | -0.003 | 0.007 | 0.64     | 0.12 | -0.001   | 0.005 | 0.873  |
| rs2065418 | T | 0.65 | 0.63   | 0.016  | 0.004 | 0.000425 | 0.64 | -0.012   | 0.004 | 0.001  |

|           |   |      |        |        |       |          |      |          |       |        |
|-----------|---|------|--------|--------|-------|----------|------|----------|-------|--------|
| rs2070929 | C | 0.29 | 0.51   | 0.007  | 0.004 | 0.0876   | 0.55 | -0.002   | 0.004 | 0.607  |
| rs2072518 | A | 0.57 | 0.46   | 0.004  | 0.004 | 0.398    | 0.51 | 0.0001   | 0.004 | 0.911  |
| rs2072597 | G | 0.31 | 0.39   | -0.01  | 0.004 | 0.016    | 0.29 | 0.004    | 0.004 | 0.344  |
| rs2074881 | C | 0.19 | 0.28   | -0.014 | 0.005 | 0.00408  | 0.29 | 0.007    | 0.005 | 0.104  |
| rs2081493 | C | 0.3  | 0.19   | -0.003 | 0.005 | 0.531    | 0.26 | 0.003    | 0.004 | 0.438  |
| rs2105808 | C | 0.67 | 0.97   | -0.029 | 0.012 | 0.0147   | 0.95 | 0.006    | 0.008 | 0.434  |
| rs2107118 | A | 0.5  | 0.48   | 0.012  | 0.004 | 0.00443  | 0.57 | -0.011   | 0.004 | 0.004  |
| rs2112347 | T | 0.63 | 0.43   | 0.02   | 0.004 | 2.73E-06 | 0.44 | -0.024   | 0.004 | <5E-08 |
| rs2134858 | C | 0.51 | 0.42   | -0.005 | 0.004 | 0.26     | 0.47 | 0.01     | 0.004 | 0.004  |
| rs2155645 | C | 0.26 | 0.38   | -0.01  | 0.004 | 0.028    | 0.35 | 0.007    | 0.004 | 0.054  |
| rs215614  | G | 0.38 | 0.39   | 0.002  | 0.004 | 0.573    | 0.34 | 0.011    | 0.004 | 0.002  |
| rs2170382 | T | 0.11 | 0.0001 | 0.053  | 0.029 | 0.0674   |      | Low MAF* |       |        |
| rs217669  | C | 0.72 | 0.57   | -0.005 | 0.004 | 0.236    | 0.61 | 0.001    | 0.004 | 0.775  |
| rs2178899 | A | 0.88 | 0.98   | -0.012 | 0.014 | 0.402    | 0.99 | 0.009    | 0.017 | 0.587  |
| rs2183824 | T | 0.31 | 0.3    | 0.002  | 0.005 | 0.71     | 0.27 | 0.001    | 0.004 | 0.843  |
| rs2187449 | A | 0.77 | 0.93   | 0.001  | 0.008 | 0.862    | 0.93 | -0.008   | 0.007 | 0.266  |
| rs2192158 | A | 0.55 | 0.6    | -0.003 | 0.004 | 0.549    | 0.63 | -0.004   | 0.004 | 0.325  |
| rs2196618 | G | 0.26 | 0.38   | -0.007 | 0.004 | 0.0972   | 0.29 | 0.011    | 0.004 | 0.017  |
| rs2206277 | T | 0.16 | 0.23   | 0.037  | 0.005 | 1.60E-13 | 0.02 | -0.029   | 0.015 | 0.873  |
| rs2228213 | G | 0.34 | 0.23   | -0.017 | 0.005 | 0.000684 | 0.27 | 0.017    | 0.004 | <5E-08 |
| rs223058  | G | 0.33 | 0.04   | -0.009 | 0.011 | 0.424    | 0.02 | 0.002    | 0.014 | 0.916  |
| rs2237403 | C | 0.64 | 0.55   | -0.001 | 0.004 | 0.755    | 0.52 | 0.009    | 0.004 | 0.014  |
| rs2241743 | G | 0.43 | 0.36   | -0.003 | 0.004 | 0.532    | 0.35 | 0.005    | 0.004 | 0.188  |
| rs2246012 | C | 0.85 | 0.65   | -0.003 | 0.004 | 0.549    | 0.65 | 0.006    | 0.004 | 0.099  |
| rs2299383 | T | 0.4  | 0.45   | 0.016  | 0.004 | 0.000154 | 0.38 | -0.01    | 0.004 | 0.009  |
| rs2307022 | A | 0.33 | 0.14   | 0.013  | 0.006 | 0.0385   | 0.12 | -0.015   | 0.006 | 0.008  |
| rs2322622 | C | 0.35 | 0.14   | 0.007  | 0.006 | 0.228    | 0.08 | 0.008    | 0.005 | 0.09   |
| rs2342892 | T | 0.49 | 0.58   | 0.021  | 0.004 | 1.04E-06 | 0.63 | -0.015   | 0.004 | <5E-08 |
| rs2357760 | A | 0.67 | 0.76   | 0.014  | 0.005 | 0.00632  | 0.69 | -0.012   | 0.004 | 0.002  |
| rs2391540 | T | 0.67 | 0.79   | 0.008  | 0.005 | 0.148    | 0.83 | 0.006    | 0.005 | 0.22   |
| rs2396625 | T | 0.58 | 0.63   | -0.01  | 0.004 | 0.028    | 0.63 | -0.002   | 0.004 | 0.646  |
| rs2400414 | C | 0.35 | 0.25   | -0.018 | 0.005 | 0.000217 | 0.22 | 0.013    | 0.004 | 0.002  |



|           |   |      |      |        |       |          |      |          |       |        |
|-----------|---|------|------|--------|-------|----------|------|----------|-------|--------|
| rs2425857 | A | 0.43 | 0.38 | 0.014  | 0.004 | 0.00138  | 0.36 | -0.005   | 0.004 | 0.174  |
| rs2434467 | T | 0.34 | 0.27 | 0.014  | 0.005 | 0.0047   | 0.35 | -0.013   | 0.004 | <5E-08 |
| rs2439823 | G | 0.45 | 0.74 | -0.004 | 0.005 | 0.46     | 0.71 | 0.003    | 0.004 | 0.438  |
| rs2447832 | T | 0.44 | 0.33 | 0.007  | 0.005 | 0.12     | 0.37 | -0.004   | 0.004 | 0.276  |
| rs2450448 | A | 0.69 | 0.93 | 0.003  | 0.008 | 0.668    | 0.92 | 0.0001   | 0.007 | 0.954  |
| rs2455793 | A | 0.42 | 0.63 | -0.005 | 0.004 | 0.291    | 0.61 | -0.005   | 0.004 | 0.199  |
| rs2470397 | C | 0.81 | 0.99 | -0.002 | 0.022 | 0.937    |      | Low MAF* |       |        |
| rs249293  | C | 0.7  | 0.43 | 0.003  | 0.004 | 0.525    | 0.5  | -0.003   | 0.004 | 0.42   |
| rs249612  | T | 0.71 | 0.46 | 0.009  | 0.004 | 0.0426   | 0.42 | -0.005   | 0.004 | 0.151  |
| rs2577947 | C | 0.82 | 0.88 | -0.006 | 0.006 | 0.357    | 0.89 | 0.013    | 0.006 | 0.027  |
| rs2596902 | G | 0.35 | 0.39 | -0.014 | 0.004 | 0.00146  | 0.41 | 0.005    | 0.004 | 0.15   |
| rs2601777 | G | 0.39 | 0.44 | -0.019 | 0.004 | 9.37E-06 | 0.47 | 0.009    | 0.004 | 0.011  |
| rs2605603 | G | 0.48 | 0.87 | -0.009 | 0.006 | 0.158    | 0.85 | 0.007    | 0.005 | 0.178  |
| rs2619976 | T | 0.4  | 0.27 | 0.004  | 0.005 | 0.412    | 0.23 | -0.004   | 0.004 | 0.341  |
| rs2622274 | G | 0.46 | 0.43 | -0.016 | 0.004 | 0.000269 | 0.41 | 0.012    | 0.004 | 0.001  |
| rs264962  | C | 0.54 | 0.35 | -0.01  | 0.004 | 0.0288   | 0.28 | -0.001   | 0.004 | 0.795  |
| rs2670854 | A | 0.72 | 0.83 | 0.012  | 0.006 | 0.0388   | 0.86 | -0.003   | 0.005 | 0.5    |
| rs2682406 | T | 0.59 | 0.64 | -0.013 | 0.004 | 0.00265  | 0.61 | 0.01     | 0.004 | 0.006  |
| rs2693686 | G | 0.61 | 0.74 | 0      | 0.005 | 0.999    | 0.8  | -0.005   | 0.004 | 0.275  |
| rs2715423 | G | 0.28 | 0.06 | 0      | 0.009 | 0.991    | 0.04 | -0.007   | 0.009 | 0.45   |
| rs273505  | C | 0.58 | 0.66 | -0.004 | 0.004 | 0.431    | 0.7  | 0.012    | 0.004 | 0.004  |
| rs2777768 | A | 0.72 | 0.96 | 0.004  | 0.01  | 0.677    | 0.98 | -0.019   | 0.012 | 0.12   |
| rs2803316 | G | 0.46 | 0.39 | -0.003 | 0.004 | 0.455    | 0.41 | 0.007    | 0.004 | 0.057  |
| rs2820295 | A | 0.33 | 0.12 | 0.006  | 0.007 | 0.394    | 0.1  | -0.021   | 0.006 | <5E-08 |
| rs2832283 | A | 0.23 | 0.05 | 0.003  | 0.01  | 0.772    | 0.04 | -0.012   | 0.01  | 0.07   |
| rs28350   | A | 0.17 | 0.08 | 0.017  | 0.008 | 0.0343   | 0.08 | -0.015   | 0.007 | 0.022  |
| rs2837398 | C | 0.61 | 0.47 | -0.011 | 0.004 | 0.00753  | 0.47 | -0.001   | 0.004 | 0.849  |
| rs284227  | C | 0.73 | 0.95 | -0.021 | 0.009 | 0.0274   | 0.95 | 0.005    | 0.008 | 0.548  |
| rs2861089 | A | 0.38 | 0.1  | 0.007  | 0.007 | 0.324    | 0.1  | -0.006   | 0.006 | 0.287  |
| rs2861685 | T | 0.59 | 0.41 | 0.006  | 0.004 | 0.166    | 0.37 | -0.01    | 0.004 | 0.006  |
| rs2862996 | G | 0.7  | 0.84 | -0.003 | 0.006 | 0.6      | 0.86 | 0.003    | 0.005 | 0.597  |
| rs2870710 | C | 0.81 | 0.74 | 0.02   | 0.005 | 2.99E-05 | 0.68 | -0.013   | 0.004 | 0.001  |

|            |   |      |      |        |       |          |      |        |       |        |
|------------|---|------|------|--------|-------|----------|------|--------|-------|--------|
| rs288230   | T | 0.84 | 0.84 | 0.006  | 0.006 | 0.304    | 0.85 | -0.003 | 0.005 | 0.597  |
| rs2899663  | G | 0.49 | 0.57 | 0.002  | 0.004 | 0.712    | 0.43 | 0.004  | 0.004 | 0.264  |
| rs2907948  | G | 0.24 | 0.05 | -0.006 | 0.01  | 0.571    | 0.04 | 0.009  | 0.009 | 0.336  |
| rs2933451  | C | 0.67 | 0.75 | -0.005 | 0.005 | 0.32     | 0.74 | 0.008  | 0.004 | 0.062  |
| rs2954021  | G | 0.51 | 0.43 | 0.005  | 0.004 | 0.238    | 0.45 | 0.002  | 0.004 | 0.564  |
| rs2968487  | T | 0.28 | 0.41 | 0.01   | 0.004 | 0.024    | 0.43 | -0.006 | 0.004 | 0.085  |
| rs29938    | C | 0.66 | 0.76 | -0.027 | 0.005 | 7.52E-08 | 0.79 | 0.014  | 0.004 | 0.001  |
| rs3101336  | C | 0.38 | 0.08 | -0.022 | 0.008 | 0.00379  | 0.07 | 0.025  | 0.007 | <5E-08 |
| rs3134358  | T | 0.62 | 0.64 | 0.006  | 0.004 | 0.202    | 0.56 | -0.003 | 0.004 | 0.366  |
| rs325220   | G | 0.3  | 0.06 | -0.007 | 0.009 | 0.476    | 0.11 | 0.014  | 0.006 | 0.016  |
| rs326845   | G | 0.38 | 0.48 | -0.001 | 0.004 | 0.872    | 0.5  | -0.003 | 0.004 | 0.38   |
| rs329124   | A | 0.59 | 0.6  | 0.018  | 0.004 | 3.21E-05 | 0.63 | -0.019 | 0.004 | <5E-08 |
| rs340025   | C | 0.41 | 0.27 | -0.01  | 0.005 | 0.0466   | 0.17 | 0.004  | 0.005 | 0.38   |
| rs34277166 | A | 0.44 | 0.11 | 0.011  | 0.007 | 0.117    | 0.08 | -0.015 | 0.006 | 0.017  |
| rs34720381 | T | 0.09 | 0.08 | 0.006  | 0.008 | 0.433    | 0.07 | -0.008 | 0.007 | 0.265  |
| rs34801745 | C | 0.36 | 0.84 | 0.002  | 0.006 | 0.776    | 0.84 | 0.001  | 0.005 | 0.836  |
| rs349088   | C | 0.48 | 0.34 | -0.001 | 0.005 | 0.767    | 0.44 | 0.004  | 0.004 | 0.257  |
| rs354508   | C | 0.16 | 0.21 | -0.008 | 0.005 | 0.113    | 0.2  | 0.003  | 0.004 | 0.488  |
| rs355777   | C | 0.4  | 0.43 | 0.007  | 0.004 | 0.11     | 0.53 | -0.009 | 0.004 | 0.008  |
| rs355914   | C | 0.63 | 0.52 | 0.001  | 0.004 | 0.868    | 0.47 | -0.007 | 0.004 | 0.05   |
| rs35809007 | G | 0.36 | 0.48 | -0.001 | 0.004 | 0.877    | 0.55 | -0.002 | 0.004 | 0.566  |
| rs35851183 | G | 0.64 | 0.57 | -0.005 | 0.004 | 0.203    | 0.52 | 0.013  | 0.004 | <5E-08 |
| rs36061954 | T | 0.4  | 0.33 | 0.019  | 0.005 | 2.45E-05 | 0.3  | 0.0001 | 0.004 | 0.989  |
| rs3738476  | C | 0.88 | 0.63 | -0.004 | 0.005 | 0.38     | 0.91 | 0.004  | 0.006 | 0.519  |
| rs3739514  | A | 0.34 | 0.55 | 0.009  | 0.004 | 0.0353   | 0.55 | -0.004 | 0.004 | 0.315  |
| rs3744017  | A | 0.19 | 0.14 | 0.003  | 0.006 | 0.646    | 0.15 | -0.001 | 0.005 | 0.864  |
| rs3746038  | C | 0.22 | 0.41 | -0.007 | 0.004 | 0.0997   | 0.5  | 0.008  | 0.004 | 0.043  |
| rs3750944  | G | 0.56 | 0.5  | -0.009 | 0.004 | 0.0287   | 0.63 | 0.004  | 0.004 | 0.291  |
| rs3752904  | C | 0.51 | 0.46 | -0.003 | 0.004 | 0.464    | 0.48 | 0.0001 | 0.004 | 0.995  |
| rs3766160  | G | 0.77 | 0.53 | -0.011 | 0.004 | 0.00805  | 0.52 | 0.003  | 0.004 | 0.438  |
| rs3770799  | G | 0.64 | 0.78 | -0.008 | 0.005 | 0.111    | 0.81 | 0.008  | 0.004 | 0.068  |
| rs3774573  | T | 0.74 | 0.84 | 0.012  | 0.006 | 0.0413   | 0.81 | -0.011 | 0.005 | 0.014  |

|            |   |      |        |        |       |          |      |          |       |        |
|------------|---|------|--------|--------|-------|----------|------|----------|-------|--------|
| rs3806114  | G | 0.69 | 0.8    | -0.004 | 0.006 | 0.493    | 0.76 | 0.003    | 0.004 | 0.45   |
| rs3808477  | C | 0.27 | 0.3    | -0.019 | 0.005 | 4.32E-05 | 0.27 | 0.015    | 0.004 | <5E-08 |
| rs3811125  | C | 0.28 | 0.24   | -0.008 | 0.005 | 0.127    | 0.27 | 0.01     | 0.004 | 0.024  |
| rs3822683  | A | 0.79 | 0.58   | 0      | 0.004 | 0.984    | 0.76 | 0.002    | 0.004 | 0.254  |
| rs3825061  | T | 0.39 | 0.17   | 0.009  | 0.006 | 0.127    | 0.12 | -0.01    | 0.006 | 0.07   |
| rs3914628  | T | 0.86 | 0.9    | 0.003  | 0.007 | 0.696    | 0.1  | -0.007   | 0.005 | 0.218  |
| rs3922980  | G | 0.5  | 0.84   | 0.001  | 0.006 | 0.875    |      | Low MAF* |       |        |
| rs3923783  | C | 0.18 | 0.13   | -0.005 | 0.006 | 0.405    | 0.11 | 0.008    | 0.006 | 0.172  |
| rs3930349  | C | 0.21 | 0.29   | -0.011 | 0.005 | 0.0235   | 0.36 | 0.006    | 0.004 | 0.113  |
| rs3935190  | G | 0.54 | 0.69   | -0.016 | 0.005 | 0.000684 | 0.6  | 0.015    | 0.004 | <5E-08 |
| rs39654    | G | 0.45 | 0.4    | -0.009 | 0.004 | 0.0363   | 0.41 | 0.009    | 0.004 | 0.015  |
| rs4097319  | T | 0.56 | 0.42   | 0.001  | 0.004 | 0.798    | 0.41 | -0.002   | 0.004 | 0.652  |
| rs4123853  | T | 0.37 | 0.25   | 0.003  | 0.005 | 0.55     | 0.18 | -0.011   | 0.005 | 0.018  |
| rs41290587 | T | 0.01 | 0.0001 | 0.085  | 0.192 | 0.659    |      | Low MAF* |       |        |
| rs4239020  | T | 0.68 | 0.93   | -0.005 | 0.008 | 0.588    | 0.95 | 0.01     | 0.008 | 0.251  |
| rs4242244  | T | 0.58 | 0.37   | 0.014  | 0.004 | 0.00218  | 0.28 | -0.007   | 0.004 | 0.092  |
| rs4256980  | G | 0.67 | 0.62   | -0.022 | 0.004 | 2.91E-07 | 0.62 | 0.019    | 0.004 | <5E-08 |
| rs4270551  | A | 0.13 | 0.003  | 0.086  | 0.05  | 0.0864   |      | Low MAF* |       |        |
| rs4273371  | C | 0.51 | 0.82   | -0.01  | 0.005 | 0.0573   | 0.79 | 0.001    | 0.004 | 0.787  |
| rs427943   | C | 0.43 | 0.49   | -0.014 | 0.004 | 0.00113  | 0.56 | 0.01     | 0.004 | 0.008  |
| rs4290163  | T | 0.4  | 0.58   | 0.015  | 0.004 | 0.000442 | 0.46 | -0.017   | 0.004 | <5E-08 |
| rs4307239  | G | 0.46 | 0.3    | -0.003 | 0.005 | 0.544    | 0.19 | 0.005    | 0.005 | 0.231  |
| rs4372836  | T | 0.33 | 0.27   | 0.013  | 0.005 | 0.0085   | 0.32 | -0.007   | 0.004 | 0.065  |
| rs4382152  | T | 0.62 | 0.2    | 0.01   | 0.005 | 0.068    | 0.19 | -0.01    | 0.004 | 0.011  |
| rs4414033  | A | 0.6  | 0.69   | 0.006  | 0.005 | 0.19     | 0.69 | -0.014   | 0.004 | <5E-08 |
| rs4421883  | C | 0.49 | 0.67   | 0.002  | 0.005 | 0.733    | 0.74 | 0.002    | 0.004 | 0.683  |
| rs4581940  | T | 0.59 | 0.75   | 0.02   | 0.005 | 3.22E-05 | 0.75 | -0.002   | 0.004 | 0.632  |
| rs459552   | T | 0.77 | 0.91   | -0.001 | 0.007 | 0.895    | 0.9  | 0.0001   | 0.006 | 0.969  |
| rs4609871  | T | 0.54 | 0.4    | 0.014  | 0.004 | 0.00112  | 0.31 | -0.012   | 0.004 | 0.001  |
| rs4671328  | T | 0.45 | 0.38   | 0.02   | 0.004 | 4.96E-06 | 0.41 | -0.02    | 0.004 | <5E-08 |
| rs4700608  | C | 0.48 | 0.15   | -0.015 | 0.006 | 0.0147   | 0.15 | 0.004    | 0.005 | 0.41   |
| rs4703019  | A | 0.39 | 0.4    | -0.001 | 0.004 | 0.738    | 0.35 | -0.007   | 0.004 | 0.044  |

|            |   |      |      |        |       |          |      |          |         |        |
|------------|---|------|------|--------|-------|----------|------|----------|---------|--------|
| rs4721089  | T | 0.78 | 0.89 | 0.008  | 0.007 | 0.231    | 0.88 | 0.005    | 0.006   | 0.399  |
| rs4721823  | G | 0.14 | 0.44 | -0.012 | 0.004 | 0.00404  | 0.51 | 0.004    | 0.004   | 0.241  |
| rs4722398  | T | 0.15 | 0.02 | 0.012  | 0.014 | 0.418    | 0.06 | -0.006   | 0.007   | 0.408  |
| rs4739570  | A | 0.62 | 0.59 | 0.01   | 0.004 | 0.021    | 0.54 | -0.013   | 0.004   | <5E-08 |
| rs4740619  | T | 0.54 | 0.24 | 0.015  | 0.005 | 0.00199  | 0.23 | -0.012   | 0.004   | 0.005  |
| rs4746339  | T | 0.26 | 0.03 | 0.01   | 0.012 | 0.417    | 0.04 | -0.026   | 0.009   | 0.004  |
| rs4794977  | C | 0.57 | 0.76 | -0.002 | 0.005 | 0.709    | 0.74 | -0.002   | 0.004   | 0.682  |
| rs4795195  | A | 0.29 | 0.41 | 0      | 0.004 | 0.983    | 0.37 | -0.004   | 0.004   | 0.259  |
| rs4802570  | C | 0.4  | 0.75 | -0.001 | 0.005 | 0.88     | 0.75 | -0.009   | 0.004   | 0.029  |
| rs4814512  | A | 0.81 | 0.8  | 0.012  | 0.005 | 0.0278   | 0.71 | -0.006   | 0.004   | 0.117  |
| rs4818226  | G | 0.31 | 0.09 | 0.011  | 0.008 | 0.144    | 0.08 | -0.004   | 0.007   | 0.522  |
| rs4834272  | C | 0.69 | 0.46 | -0.01  | 0.004 | 0.0236   | 0.53 | 0.014    | 0.004   | <5E-08 |
| rs4841504  | C | 0.5  | 0.04 | -0.014 | 0.011 | 0.221    | 0.03 | -0.014   | 0.011   | 0.223  |
| rs4851057  | T | 0.13 | 0.03 | 0.011  | 0.013 | 0.389    | 0.02 | 0.002    | 0.014   | 0.877  |
| rs4857968  | G | 0.29 | 0.04 | -0.018 | 0.012 | 0.118    | 0.03 | 0.008    | 0.011   | 0.473  |
| rs487152   | A | 0.5  | 0.33 | 0.012  | 0.005 | 0.0072   | 0.29 | -0.02    | 0.004   | <5E-08 |
| rs4880341  | C | 0.57 | 0.94 | -0.01  | 0.008 | 0.234    | 0.92 | 0.0001   | 0.01    | 0.39   |
| rs4895231  | C | 0.47 | 0.2  | -0.005 | 0.006 | 0.398    | 0.13 | 0.0001   | 0.00555 | 0.4097 |
| rs4906263  | G | 0.66 | 0.58 | -0.028 | 0.004 | 4.90E-11 | 0.54 | 0.011    | 0.004   | 0.003  |
| rs4973618  | G | 0.66 | 0.5  | -0.004 | 0.004 | 0.404    | 0.49 | 0.009    | 0.004   | 0.014  |
| rs4985155  | A | 0.67 | 0.55 | 0.01   | 0.004 | 0.0151   | 0.55 | -0.016   | 0.004   | <5E-08 |
| rs5017416  | T | 0.05 | 0.01 | 0.028  | 0.029 | 0.324    |      | Low MAF* |         |        |
| rs507856   | T | 0.56 | 0.44 | 0.01   | 0.004 | 0.0235   | 0.36 | -0.008   | 0.004   | 0.041  |
| rs5215     | T | 0.63 | 0.62 | 0.013  | 0.004 | 0.00301  | 0.63 | -0.018   | 0.004   | <5E-08 |
| rs539100   | A | 0.22 | 0.02 | 0.013  | 0.015 | 0.379    | 0.04 | -0.001   | 0.01    | 0.893  |
| rs543874   | G | 0.78 | 0.82 | -0.056 | 0.005 | 3.01E-25 | 0.78 | 0.047    | 0.004   | <5E-08 |
| rs544722   | T | 0.45 | 0.76 | 0.004  | 0.005 | 0.395    | 0.79 | -0.002   | 0.004   | 0.604  |
| rs55676934 | G | 0.67 | 0.81 | -0.005 | 0.005 | 0.349    | 0.81 | 0.004    | 0.005   | 0.416  |
| rs559267   | G | 0.67 | 0.58 | -0.015 | 0.004 | 0.000416 | 0.56 | 0.018    | 0.004   | <5E-08 |
| rs55966114 | T | 0.19 | 0.16 | 0.01   | 0.006 | 0.0938   | 0.14 | -0.013   | 0.005   | 0.014  |
| rs561136   | C | 0.87 | 0.92 | -0.021 | 0.008 | 0.00826  | 0.81 | 0.009    | 0.004   | 0.041  |
| rs56356382 | T | 0.81 | 0.99 | 0.033  | 0.037 | 0.372    |      | Low MAF* |         |        |

|            |   |      |       |        |       |          |      |          |       |        |
|------------|---|------|-------|--------|-------|----------|------|----------|-------|--------|
| rs57800857 | A | 0.63 | 0.73  | -0.014 | 0.005 | 0.0036   | 0.76 | -0.011   | 0.004 | 0.009  |
| rs58139454 | G | 0.22 | 0.19  | -0.007 | 0.005 | 0.18     | 0.22 | 0.01     | 0.004 | 0.026  |
| rs592483   | C | 0.41 | 0.21  | -0.02  | 0.005 | 0.000221 | 0.19 | 0.004    | 0.005 | 0.386  |
| rs59302296 | A | 0.1  | 0.002 | 0.06   | 0.054 | 0.271    |      | Low MAF* |       |        |
| rs594821   | C | 0.09 | 0.06  | -0.031 | 0.009 | 0.000535 | 0.12 | 0.01     | 0.006 | 0.075  |
| rs6019483  | T | 0.17 | 0.08  | -0.015 | 0.008 | 0.0632   | 0.12 | 0.004    | 0.006 | 0.44   |
| rs6023633  | G | 0.78 | 0.99  | 0.002  | 0.04  | 0.956    |      | Low MAF* |       |        |
| rs6092179  | C | 0.2  | 0.15  | -0.027 | 0.006 | 5.23E-06 | 0.12 | 0.02     | 0.005 | <5E-08 |
| rs61051952 | A | 0.75 | 0.62  | 0      | 0.004 | 0.939    | 0.67 | -0.003   | 0.004 | 0.383  |
| rs6130360  | A | 0.85 | 0.75  | 0.014  | 0.005 | 0.00417  | 0.8  | -0.017   | 0.005 | <5E-08 |
| rs6142067  | T | 0.6  | 0.75  | 0.014  | 0.005 | 0.00411  | 0.65 | -0.009   | 0.004 | 0.019  |
| rs615568   | G | 0.52 | 0.9   | 0.012  | 0.007 | 0.0765   | 0.9  | 0.005    | 0.006 | 0.385  |
| rs61740466 | G | 0.77 | 0.51  | -0.02  | 0.004 | 3.26E-06 | 0.65 | 0.007    | 0.004 | 0.079  |
| rs61813324 | T | 0.13 | 0.003 | 0.021  | 0.051 | 0.68     |      | Low MAF* |       |        |
| rs61828641 | A | 0.11 | 0.26  | 0.023  | 0.005 | 1.44E-06 | 0.21 | -0.021   | 0.004 | <5E-08 |
| rs61903695 | G | 0.75 | 0.9   | -0.008 | 0.007 | 0.247    | 0.89 | 0.013    | 0.006 | 0.017  |
| rs62118504 | G | 0.61 | 0.98  | -0.005 | 0.015 | 0.723    | 0.99 | -0.01    | 0.028 | 0.731  |
| rs6265     | C | 0.18 | 0.49  | -0.036 | 0.004 | 1.75E-17 | 0.41 | 0.038    | 0.004 | <5E-08 |
| rs630602   | C | 0.61 | 0.33  | 0.002  | 0.005 | 0.628    | 0.38 | 0.001    | 0.004 | 0.804  |
| rs6419734  | T | 0.14 | 0.01  | -0.008 | 0.023 | 0.745    |      | Low MAF* |       |        |
| rs6435622  | C | 0.32 | 0.33  | 0.015  | 0.005 | 0.00138  | 0.48 | -0.013   | 0.004 | <5E-08 |
| rs6443750  | C | 0.2  | 0.01  | -0.039 | 0.048 | 0.416    |      | Low MAF* |       |        |
| rs6451675  | G | 0.32 | 0.18  | -0.019 | 0.006 | 0.000672 | 0.19 | 0.004    | 0.004 | 0.312  |
| rs6463489  | T | 0.1  | 0.08  | 0.004  | 0.008 | 0.619    | 0.04 | -0.003   | 0.009 | 0.74   |
| rs6476617  | G | 0.38 | 0.2   | -0.01  | 0.005 | 0.0642   | 0.26 | 0.011    | 0.004 | 0.006  |
| rs6477694  | C | 0.36 | 0.43  | -0.014 | 0.004 | 0.00148  | 0.39 | 0.016    | 0.004 | <5E-08 |
| rs6493498  | T | 0.45 | 0.48  | 0.007  | 0.004 | 0.0947   | 0.59 | 0.002    | 0.004 | 0.586  |
| rs6500208  | A | 0.2  | 0.42  | 0.002  | 0.004 | 0.689    | 0.39 | -0.01    | 0.004 | 0.005  |
| rs650198   | C | 0.73 | 0.76  | 0.008  | 0.005 | 0.107    | 0.72 | 0.003    | 0.004 | 0.464  |
| rs6511027  | C | 0.17 | 0.02  | -0.027 | 0.015 | 0.0708   | 0.01 | -0.004   | 0.016 | 0.813  |
| rs6512302  | C | 0.74 | 0.72  | 0.005  | 0.005 | 0.304    | 0.73 | -0.003   | 0.004 | 0.438  |
| rs651548   | A | 0.36 | 0.38  | 0.008  | 0.004 | 0.0651   | 0.41 | 0.006    | 0.004 | 0.121  |

|           |   |      |      |        |       |          |      |        |       |        |
|-----------|---|------|------|--------|-------|----------|------|--------|-------|--------|
| rs6539064 | C | 0.75 | 0.66 | 0.005  | 0.005 | 0.3      | 0.64 | -0.009 | 0.004 | 0.02   |
| rs6540498 | T | 0.62 | 0.55 | -0.002 | 0.004 | 0.61     | 0.42 | 0.003  | 0.004 | 0.473  |
| rs6545714 | G | 0.61 | 0.64 | 0.008  | 0.004 | 0.0603   | 0.7  | 0.009  | 0.004 | 0.018  |
| rs6556301 | G | 0.63 | 0.55 | -0.011 | 0.004 | 0.00766  | 0.57 | 0.007  | 0.004 | 0.066  |
| rs6561766 | A | 0.13 | 0.11 | 0      | 0.007 | 0.949    | 0.12 | -0.012 | 0.005 | 0.028  |
| rs6567160 | C | 0.75 | 0.8  | -0.06  | 0.005 | 3.45E-30 | 0.78 | 0.051  | 0.004 | <5E-08 |
| rs6574100 | A | 0.59 | 0.9  | 0.011  | 0.007 | 0.123    | 0.9  | -0.006 | 0.006 | 0.314  |
| rs6577584 | G | 0.66 | 0.82 | -0.009 | 0.005 | 0.11     | 0.82 | 0.014  | 0.005 | 0.002  |
| rs6591407 | C | 0.2  | 0.1  | -0.006 | 0.007 | 0.421    | 0.15 | 0.008  | 0.005 | 0.09   |
| rs6602411 | T | 0.18 | 0.02 | 0.014  | 0.014 | 0.334    | 0.01 | 0.008  | 0.016 | 0.634  |
| rs6604015 | C | 0.91 | 0.97 | -0.016 | 0.011 | 0.155    | 0.98 | 0.019  | 0.014 | 0.163  |
| rs6606686 | G | 0.7  | 0.99 | -0.031 | 0.025 | 0.204    | 0.98 | 0.009  | 0.013 | 0.691  |
| rs6607337 | C | 0.3  | 0.25 | -0.01  | 0.005 | 0.0521   | 0.75 | 0.004  | 0.004 | 0.359  |
| rs6661316 | T | 0.59 | 0.44 | 0.013  | 0.004 | 0.00322  | 0.42 | -0.013 | 0.004 | <5E-08 |
| rs6690398 | A | 0.55 | 0.51 | 0.012  | 0.004 | 0.00364  | 0.44 | -0.009 | 0.004 | 0.017  |
| rs6696828 | C | 0.3  | 0.28 | 0.008  | 0.005 | 0.079    | 0.25 | -0.004 | 0.004 | 0.341  |
| rs6710871 | A | 0.14 | 0.1  | 0.025  | 0.007 | 0.000328 | 0.14 | -0.011 | 0.005 | 0.034  |
| rs6720868 | T | 0.31 | 0.23 | 0      | 0.005 | 0.925    | 0.23 | -0.007 | 0.004 | 0.1    |
| rs6733834 | C | 0.81 | 0.71 | 0.019  | 0.005 | 5.98E-05 | 0.78 | -0.018 | 0.004 | <5E-08 |
| rs6781254 | T | 0.3  | 0.34 | 0.006  | 0.004 | 0.201    | 0.32 | -0.006 | 0.004 | 0.15   |
| rs6804181 | A | 0.82 | 0.84 | 0.02   | 0.006 | 0.000617 | 0.76 | -0.016 | 0.004 | <5E-08 |
| rs6804842 | G | 0.43 | 0.37 | -0.008 | 0.005 | 0.0782   | 0.38 | 0.013  | 0.004 | 0.001  |
| rs6804915 | A | 0.29 | 0.25 | 0.02   | 0.005 | 4.50E-05 | 0.23 | -0.011 | 0.004 | 0.012  |
| rs6809307 | T | 0.26 | 0.36 | 0.011  | 0.004 | 0.0124   | 0.39 | -0.013 | 0.004 | <5E-08 |
| rs6818414 | C | 0.52 | 0.69 | -0.003 | 0.005 | 0.469    | 0.72 | 0.011  | 0.004 | 0.007  |
| rs6832762 | G | 0.51 | 0.08 | 0.003  | 0.008 | 0.689    | 0.05 | 0.002  | 0.008 | 0.82   |
| rs6850421 | A | 0.46 | 0.54 | 0.003  | 0.004 | 0.442    | 0.44 | 0.0001 | 0.004 | 0.99   |
| rs6857    | C | 0.17 | 0.1  | -0.004 | 0.007 | 0.616    | 0.17 | 0.014  | 0.005 | 0.004  |
| rs6864049 | G | 0.49 | 0.3  | -0.005 | 0.005 | 0.25     | 0.31 | 0.015  | 0.004 | <5E-08 |
| rs6890310 | G | 0.29 | 0.09 | -0.01  | 0.008 | 0.211    | 0.08 | 0.0001 | 0.006 | 0.993  |
| rs6905288 | G | 0.57 | 0.73 | -0.012 | 0.005 | 0.0144   | 0.79 | -0.005 | 0.005 | 0.244  |
| rs6916553 | G | 0.24 | 0.02 | -0.015 | 0.016 | 0.341    | 0.03 | 0.028  | 0.011 | 0.013  |

|           |   |      |       |        |       |          |      |          |       |        |
|-----------|---|------|-------|--------|-------|----------|------|----------|-------|--------|
| rs6922607 | G | 0.81 | 0.92  | 0.001  | 0.007 | 0.886    | 0.89 | 0.0001   | 0.006 | 0.979  |
| rs6931385 | A | 0.48 | 0.4   | -0.001 | 0.004 | 0.904    | 0.48 | -0.008   | 0.004 | 0.028  |
| rs6932930 | G | 0.79 | 0.65  | -0.006 | 0.004 | 0.171    | 0.25 | 0.004    | 0.004 | 0.33   |
| rs6934973 | G | 0.7  | 0.58  | -0.006 | 0.004 | 0.138    | 0.68 | 0.003    | 0.004 | 0.356  |
| rs6954694 | G | 0.84 | 0.63  | -0.007 | 0.005 | 0.108    |      | Low MAF* |       |        |
| rs6962280 | G | 0.44 | 0.19  | -0.009 | 0.005 | 0.0996   | 0.19 | 0.013    | 0.005 | 0.011  |
| rs6968554 | G | 0.61 | 0.58  | -0.005 | 0.004 | 0.248    | 0.66 | 0.004    | 0.004 | 0.236  |
| rs6970595 | C | 0.58 | 0.8   | 0.002  | 0.005 | 0.638    | 0.77 | 0.005    | 0.004 | 0.279  |
| rs698147  | A | 0.45 | 0.45  | 0.005  | 0.004 | 0.244    | 0.51 | -0.002   | 0.004 | 0.551  |
| rs7024334 | T | 0.23 | 0.57  | 0.009  | 0.004 | 0.0362   | 0.58 | -0.014   | 0.004 | <5E-08 |
| rs7031064 | A | 0.53 | 0.59  | 0.004  | 0.004 | 0.3      | 0.42 | 0.0001   | 0.004 | 0.927  |
| rs7037266 | C | 0.36 | 0.69  | -0.003 | 0.005 | 0.483    | 0.63 | 0.008    | 0.004 | 0.035  |
| rs704061  | C | 0.55 | 0.62  | -0.006 | 0.004 | 0.159    | 0.95 | 0.005    | 0.009 | 0.059  |
| rs7070670 | C | 0.32 | 0.18  | -0.001 | 0.006 | 0.878    | 0.13 | 0.0001   | 0.006 | 0.97   |
| rs7084454 | A | 0.31 | 0.01  | 0.018  | 0.018 | 0.322    |      | Low MAF* |       |        |
| rs709400  | A | 0.62 | 0.93  | -0.006 | 0.008 | 0.486    | 0.87 | -0.01    | 0.005 | 0.054  |
| rs7123876 | C | 0.75 | 0.84  | -0.007 | 0.006 | 0.24     | 0.76 | 0.015    | 0.004 | <5E-08 |
| rs7124681 | A | 0.42 | 0.31  | 0.021  | 0.005 | 4.48E-06 | 0.31 | -0.022   | 0.004 | <5E-08 |
| rs7133378 | A | 0.33 | 0.13  | 0.011  | 0.006 | 0.0826   | 0.16 | -0.008   | 0.005 | 0.117  |
| rs7134628 | A | 0.1  | 0.01  | -0.008 | 0.032 | 0.814    |      | Low MAF* |       |        |
| rs713763  | A | 0.42 | 0.19  | -0.001 | 0.005 | 0.91     | 0.19 | -0.004   | 0.005 | 0.459  |
| rs7138803 | A | 0.39 | 0.28  | 0.023  | 0.005 | 1.63E-06 | 0.35 | -0.01    | 0.004 | 0.007  |
| rs7141307 | C | 0.74 | 0.86  | -0.016 | 0.006 | 0.00996  | 0.79 | 0.008    | 0.005 | 0.083  |
| rs7144011 | T | 0.23 | 0.002 | -0.028 | 0.044 | 0.525    |      | Low MAF* |       |        |
| rs715     | C | 0.7  | 0.82  | -0.011 | 0.005 | 0.0504   | 0.84 | 0.014    | 0.005 | 0.005  |
| rs7181610 | A | 0.86 | 0.99  | -0.028 | 0.062 | 0.656    | 0.84 | -0.002   | 0.005 | 0.607  |
| rs7186893 | G | 0.26 | 0.1   | 0      | 0.007 | 0.997    | 0.08 | 0.014    | 0.006 | 0.03   |
| rs7189122 | C | 0.83 | 0.66  | -0.005 | 0.004 | 0.258    | 0.66 | 0.009    | 0.004 | 0.012  |
| rs719802  | T | 0.4  | 0.48  | 0.001  | 0.004 | 0.82     | 0.56 | -0.007   | 0.004 | 0.052  |
| rs7206608 | G | 0.68 | 0.94  | -0.015 | 0.009 | 0.0776   | 0.94 | 0.001    | 0.008 | 0.88   |
| rs7217226 | G | 0.66 | 0.74  | -0.016 | 0.005 | 0.000727 | 0.77 | 0.02     | 0.004 | <5E-08 |
| rs7219230 | T | 0.34 | 0.74  | 0.015  | 0.005 | 0.00134  | 0.85 | -0.005   | 0.005 | 0.56   |

|            |   |      |      |        |       |          |      |          |         |         |
|------------|---|------|------|--------|-------|----------|------|----------|---------|---------|
| rs7238896  | G | 0.86 | 0.99 | -0.036 | 0.044 | 0.418    |      | Low MAF* |         |         |
| rs7239114  | A | 0.54 | 0.12 | 0.017  | 0.007 | 0.0104   | 0.11 | -0.014   | 0.006   | 0.01    |
| rs7243357  | T | 0.83 | 0.8  | 0.029  | 0.005 | 4.75E-08 | 0.77 | -0.015   | 0.005   | 0.005   |
| rs7259325  | G | 0.48 | 0.7  | -0.004 | 0.005 | 0.402    | 0.7  | -0.003   | 0.004   | 0.515   |
| rs72673947 | G | 0.89 | 0.92 | -0.006 | 0.008 | 0.437    | 0.9  | 0.004    | 0.006   | 0.486   |
| rs730180   | A | 0.79 | 0.46 | 0.006  | 0.004 | 0.163    | 0.49 | -0.005   | 0.004   | 0.145   |
| rs7318817  | C | 0.63 | 0.83 | -0.018 | 0.006 | 0.00129  | 0.86 | 0.012    | 0.005   | 0.014   |
| rs73213501 | A | 0.83 | 0.83 | -0.002 | 0.006 | 0.659    | 0.9  | -0.004   | 0.006   | 0.541   |
| rs73249175 | G | 0.88 | 0.99 | 0.006  | 0.066 | 0.93     |      | Low MAF* |         |         |
| rs7357754  | G | 0.5  | 0.72 | 0.001  | 0.005 | 0.864    | 0.65 | 0.005    | 0.004   | 0.175   |
| rs740157   | A | 0.45 | 0.37 | 0.01   | 0.004 | 0.0185   | 0.37 | -0.01    | 0.004   | 0.005   |
| rs7498044  | G | 0.21 | 0.01 | -0.016 | 0.025 | 0.513    |      | Low MAF* |         |         |
| rs7498665  | G | 0.62 | 0.88 | -0.017 | 0.006 | 0.00793  | 0.86 | 0.03     | 0.005   | <5E-08  |
| rs7523668  | G | 0.44 | 0.72 | 0      | 0.005 | 0.981    | 0.65 | 0.005    | 0.004   | 0.17    |
| rs7534091  | G | 0.72 | 0.66 | -0.017 | 0.004 | 0.000104 | 0.51 | 0.015    | 0.004   | <5E-08  |
| rs7537581  | A | 0.53 | 0.53 | 0.013  | 0.004 | 0.00324  | 0.48 | 0.0001   | 0.00411 | 0.03179 |
| rs7561278  | T | 0.77 | 0.67 | 0.016  | 0.005 | 0.000322 | 0.56 | -0.016   | 0.004   | <5E-08  |
| rs7570446  | A | 0.54 | 0.59 | 0      | 0.004 | 0.962    | 0.43 | 0        | 0.004   | 0.988   |
| rs7575118  | T | 0.16 | 0.02 | 0.002  | 0.021 | 0.916    | 0.02 | -0.024   | 0.012   | 0.051   |
| rs7588437  | G | 0.37 | 0.25 | -0.016 | 0.005 | 0.000979 | 0.22 | 0.018    | 0.004   | <5E-08  |
| rs7589023  | T | 0.84 | 0.96 | 0.017  | 0.011 | 0.106    | 0.96 | 0.003    | 0.009   | 0.753   |
| rs7599312  | G | 0.27 | 0.03 | -0.018 | 0.012 | 0.134    | 0.04 | 0.015    | 0.01    | 0.111   |
| rs7601895  | C | 0.69 | 0.94 | 0.014  | 0.009 | 0.11     | 0.91 | 0.003    | 0.006   | 0.675   |
| rs761423   | T | 0.54 | 0.73 | 0.006  | 0.005 | 0.221    | 0.71 | -0.011   | 0.004   | 0.005   |
| rs7616009  | G | 0.16 | 0.42 | 0.004  | 0.004 | 0.336    | 0.5  | 0.012    | 0.004   | 0.001   |
| rs7621025  | C | 0.26 | 0.13 | -0.005 | 0.006 | 0.427    | 0.18 | 0.015    | 0.005   | 0.002   |
| rs7631156  | A | 0.31 | 0.13 | 0.025  | 0.006 | 7.41E-05 | 0.08 | -0.021   | 0.006   | 0.001   |
| rs765875   | C | 0.47 | 0.55 | -0.009 | 0.004 | 0.04     | 0.55 | 0.0001   | 0.004   | 0.918   |
| rs7678054  | G | 0.48 | 0.7  | -0.007 | 0.005 | 0.124    | 0.79 | 0.013    | 0.004   | 0.003   |
| rs76942203 | A | 0.06 | 0.1  | 0.019  | 0.007 | 0.00628  | 0.1  | -0.019   | 0.006   | 0.002   |
| rs7713317  | G | 0.72 | 0.67 | -0.019 | 0.004 | 3.21E-05 | 0.78 | 0.021    | 0.004   | <5E-08  |
| rs7714712  | C | 0.37 | 0.19 | -0.021 | 0.005 | 0.000116 | 0.14 | 0.012    | 0.005   | 0.023   |



|            |   |      |       |        |       |         |      |          |       |        |
|------------|---|------|-------|--------|-------|---------|------|----------|-------|--------|
| rs7734385  | G | 0.44 | 0.23  | 0.005  | 0.005 | 0.303   | 0.26 | 0.005    | 0.004 | 0.199  |
| rs7740107  | T | 0.74 | 0.97  | -0.035 | 0.011 | 0.00171 | 0.98 | 0.03     | 0.012 | 0.013  |
| rs77432547 | G | 0.72 | 0.95  | 0.011  | 0.009 | 0.232   | 0.95 | 0.02     | 0.008 | 0.013  |
| rs7769594  | T | 0.16 | 0.14  | -0.005 | 0.006 | 0.41    | 0.07 | -0.004   | 0.007 | 0.541  |
| rs7777084  | A | 0.46 | 0.41  | 0.003  | 0.004 | 0.417   | 0.37 | -0.012   | 0.004 | 0.002  |
| rs7784465  | C | 0.86 | 0.99  | -0.006 | 0.016 | 0.724   | 0.99 | 0.009    | 0.018 | 0.624  |
| rs779206   | G | 0.72 | 0.67  | 0.006  | 0.004 | 0.16    | 0.64 | 0.004    | 0.004 | 0.249  |
| rs7802342  | G | 0.7  | 0.78  | -0.013 | 0.005 | 0.0106  | 0.74 | 0.01     | 0.004 | 0.016  |
| rs7826312  | C | 0.43 | 0.83  | 0      | 0.006 | 0.969   | 0.84 | -0.003   | 0.005 | 0.514  |
| rs786420   | T | 0.77 | 0.36  | 0.006  | 0.004 | 0.179   | 0.42 | 0.001    | 0.004 | 0.842  |
| rs7871866  | C | 0.16 | 0.19  | 0.014  | 0.006 | 0.0102  | 0.22 | -0.016   | 0.005 | <5E-08 |
| rs7893571  | T | 0.67 | 0.89  | -0.005 | 0.007 | 0.485   | 0.9  | -0.017   | 0.006 | 0.003  |
| rs7899106  | G | 0.95 | 0.99  | -0.061 | 0.035 | 0.0791  |      | Low MAF* |       |        |
| rs7903146  | C | 0.28 | 0.04  | -0.012 | 0.011 | 0.291   | 0.04 | -0.057   | 0.009 | <5E-08 |
| rs79113395 | G | 0.27 | 0.15  | -0.008 | 0.006 | 0.221   |      | Low MAF* |       |        |
| rs7944782  | G | 0.5  | 0.45  | -0.013 | 0.004 | 0.00231 | 0.55 | 0.005    | 0.004 | 0.15   |
| rs7947143  | G | 0.15 | 0.13  | 0.003  | 0.006 | 0.583   | 0.09 | 0.001    | 0.006 | 0.85   |
| rs7961979  | A | 0.13 | 0.002 | -0.042 | 0.051 | 0.411   |      | Low MAF* |       |        |
| rs7968390  | A | 0.68 | 0.57  | 0.008  | 0.004 | 0.076   | 0.41 | -0.01    | 0.004 | 0.004  |
| rs7975187  | G | 0.77 | 0.69  | 0.001  | 0.005 | 0.877   | 0.62 | 0.013    | 0.004 | 0.001  |
| rs7976757  | C | 0.18 | 0.28  | 0.001  | 0.005 | 0.816   | 0.23 | 0.007    | 0.004 | 0.091  |
| rs8016859  | C | 0.04 | 0.001 | 0.063  | 0.084 | 0.453   |      | Low MAF* |       |        |
| rs8024806  | T | 0.94 | 0.98  | -0.006 | 0.015 | 0.667   | 0.99 | 0.007    | 0.017 | 0.696  |
| rs8033510  | T | 0.36 | 0.39  | 0.008  | 0.004 | 0.0703  | 0.4  | -0.009   | 0.004 | 0.017  |
| rs8038464  | T | 0.4  | 0.5   | -0.013 | 0.004 | 0.00318 | 0.47 | 0.008    | 0.004 | 0.033  |
| rs8075273  | C | 0.29 | 0.07  | -0.007 | 0.008 | 0.392   | 0.05 | -0.004   | 0.008 | 0.633  |
| rs8081039  | T | 0.06 | 0.005 | 0.034  | 0.033 | 0.298   | 0.03 | 0.016    | 0.011 | 0.149  |
| rs8092503  | G | 0.77 | 0.57  | -0.007 | 0.004 | 0.0858  | 0.7  | 0.018    | 0.004 | <5E-08 |
| rs8122855  | A | 0.34 | 0.62  | 0.01   | 0.004 | 0.0185  | 0.62 | 0.001    | 0.004 | 0.756  |
| rs8134638  | C | 0.63 | 0.75  | 0.003  | 0.005 | 0.59    | 0.77 | 0.005    | 0.005 | 0.286  |
| rs816367   | G | 0.65 | 0.67  | -0.008 | 0.005 | 0.0766  | 0.64 | 0.008    | 0.004 | 0.023  |
| rs8181823  | C | 0.23 | 0.08  | -0.011 | 0.008 | 0.136   | 0.09 | 0.005    | 0.006 | 0.423  |

|           |   |      |      |        |       |          |      |          |       |        |
|-----------|---|------|------|--------|-------|----------|------|----------|-------|--------|
| rs845084  | A | 0.27 | 0.43 | 0.022  | 0.004 | 2.20E-07 | 0.35 | -0.013   | 0.004 | 0.001  |
| rs857601  | T | 0.71 | 0.96 | 0.001  | 0.01  | 0.906    | 0.97 | 0.03     | 0.01  | 0.003  |
| rs867560  | G | 0.57 | 0.15 | -0.018 | 0.006 | 0.0027   | 0.1  | 0.014    | 0.006 | 0.019  |
| rs872281  | C | 0.18 | 0.32 | -0.004 | 0.005 | 0.324    | 0.25 | 0.006    | 0.004 | 0.143  |
| rs889398  | C | 0.42 | 0.12 | -0.004 | 0.007 | 0.5      | 0.14 | 0.006    | 0.005 | 0.258  |
| rs891387  | T | 0.5  | 0.08 | 0.014  | 0.008 | 0.0662   | 0.06 | -0.018   | 0.007 | 0.015  |
| rs9077    | G | 0.27 | 0.06 | -0.014 | 0.009 | 0.117    | 0.05 | -0.002   | 0.008 | 0.771  |
| rs930295  | A | 0.15 | 0.19 | 0.008  | 0.005 | 0.142    | 0.17 | -0.011   | 0.005 | 0.029  |
| rs9317002 | A | 0.51 | 0.32 | 0.008  | 0.005 | 0.0718   | 0.3  | -0.01    | 0.004 | 0.014  |
| rs9320823 | C | 0.41 | 0.42 | 0.005  | 0.004 | 0.216    | 0.37 | 0.007    | 0.004 | 0.048  |
| rs934515  | A | 0.12 | 0.2  | 0.014  | 0.005 | 0.0109   | 0.18 | 0.005    | 0.005 | 0.265  |
| rs9376609 | A | 0.38 | 0.28 | 0.006  | 0.005 | 0.224    | 0.21 | 0.007    | 0.004 | 0.091  |
| rs942066  | G | 0.63 | 0.8  | -0.007 | 0.005 | 0.202    | 0.82 | 0.018    | 0.005 | <5E-08 |
| rs944340  | T | 0.42 | 0.64 | 0.003  | 0.004 | 0.47     | 0.6  | 0.0001   | 0.004 | 0.992  |
| rs945211  | C | 0.63 | 0.32 | 0.007  | 0.005 | 0.12     | 0.3  | -0.011   | 0.004 | 0.004  |
| rs946824  | T | 0.14 | 0.11 | 0.008  | 0.007 | 0.236    | 0.09 | -0.007   | 0.006 | 0.257  |
| rs947088  | T | 0.74 | 0.99 | 0.029  | 0.029 | 0.319    |      | Low MAF* |       |        |
| rs9479509 | A | 0.29 | 0.62 | 0.008  | 0.004 | 0.0583   | 0.5  | -0.015   | 0.004 | <5E-08 |
| rs9514131 | G | 0.13 | 0.1  | -0.009 | 0.007 | 0.219    | 0.1  | 0.006    | 0.006 | 0.31   |
| rs9527455 | C | 0.23 | 0.08 | -0.019 | 0.008 | 0.0156   |      | Low MAF* |       |        |
| rs9540493 | A | 0.46 | 0.75 | 0.01   | 0.005 | 0.0615   | 0.67 | -0.016   | 0.005 | 0.001  |
| rs9571687 | C | 0.34 | 0.38 | -0.016 | 0.004 | 0.000326 | 0.37 | 0.003    | 0.004 | 0.424  |
| rs9595908 | T | 0.64 | 0.83 | 0.009  | 0.006 | 0.0989   | 0.84 | -0.014   | 0.005 | 0.006  |
| rs9603697 | T | 0.32 | 0.48 | 0.01   | 0.004 | 0.0176   | 0.49 | -0.007   | 0.004 | 0.061  |
| rs972540  | G | 0.72 | 0.8  | -0.005 | 0.005 | 0.327    | 0.83 | 0.013    | 0.005 | 0.008  |
| rs9808302 | G | 0.53 | 0.52 | 0.004  | 0.004 | 0.315    | 0.47 | -0.007   | 0.004 | 0.038  |
| rs9816029 | C | 0.34 | 0.08 | 0.015  | 0.008 | 0.047    | 0.09 | -0.005   | 0.006 | 0.403  |
| rs9816226 | T | 0.18 | 0.05 | -0.061 | 0.01  | 1.27E-09 | 0.02 | 0.04     | 0.015 | 0.008  |
| rs9818122 | C | 0.79 | 0.99 | -0.013 | 0.031 | 0.673    |      | Low MAF* |       |        |
| rs9826775 | A | 0.85 | 0.86 | -0.007 | 0.006 | 0.24     | 0.87 | -0.005   | 0.005 | 0.338  |
| rs9839267 | T | 0.89 | 0.85 | 0.028  | 0.006 | 2.60E-06 | 0.83 | -0.011   | 0.005 | 0.018  |
| rs9839653 | G | 0.83 | 0.99 | -0.071 | 0.046 | 0.122    |      | Low MAF* |       |        |

|           |   |      |      |        |       |          |      |          |       |        |
|-----------|---|------|------|--------|-------|----------|------|----------|-------|--------|
| rs985060  | G | 0.27 | 0.43 | -0.002 | 0.004 | 0.601    | 0.39 | 0.001    | 0.004 | 0.846  |
| rs9862795 | T | 0.52 | 0.85 | 0.005  | 0.006 | 0.388    | 0.84 | 0.015    | 0.005 | 0.002  |
| rs987071  | C | 0.77 | 0.99 | 0.012  | 0.026 | 0.648    |      | Low MAF* |       |        |
| rs9929792 | A | 0.5  | 0.86 | 0.013  | 0.006 | 0.0269   | 0.91 | 0.013    | 0.006 | 0.042  |
| rs9937053 | A | 0.44 | 0.17 | 0.072  | 0.006 | 2.09E-38 | 0.23 | -0.069   | 0.004 | <5E-08 |
| rs9965170 | G | 0.43 | 0.14 | -0.009 | 0.006 | 0.152    | 0.15 | 0.012    | 0.005 | 0.016  |

Abbreviation: MAF, minor allele frequency.

### Supplementary Table 3. Associations of potential confounders with BMI GRS

| Confounder        | OR (95% CI)       |
|-------------------|-------------------|
| Current smoking   | 1.03 (0.94, 1.13) |
| Weekly drinking   | 1.09 (0.98, 1.21) |
| Physical activity | 0.93 (0.82, 1.04) |
| Education         | 0.99 (0.89, 1.10) |
| Income            | 1.02 (0.95, 1.09) |

The model was adjusted for age at baseline, age squared, sex, 10 regions, and 10 PCs, education, smoking, and alcohol.

Potential confounders were dichotomised: current smoking (yes vs no), weekly drinking (yes vs no), total PA ( $\geq 30$  vs  $< 30$  MET-h/day), education ( $\geq 9$  vs  $< 9$  years), and household income ( $\geq 10,000$  vs  $< 10,000$  RMB/year).

The analysis of smoking and alcohol was conducted in men due to the small number of women who smoked or drank.

**Supplementary Table 4. Observational associations of adiposity with metabolic biomarkers**

| Biochemical                                             | BMI     |       |         |       | WC      |       |         |       | WCadjBMI |       |         |       |
|---------------------------------------------------------|---------|-------|---------|-------|---------|-------|---------|-------|----------|-------|---------|-------|
|                                                         | $\beta$ | SE    | p-value | p-BH  | $\beta$ | SE    | p-value | p-BH  | $\beta$  | SE    | p-value | p-BH  |
| <b>FDR-adjusted p-value&lt;0.05 for BMI</b>             |         |       |         |       |         |       |         |       |          |       |         |       |
| 1-(1-enyl-palmitoyl)-2-linoleoyl-GPC (P-16:0/18:2)*     | -0.216  | 0.074 | 0.004   | 0.029 | -0.269  | 0.076 | 0.001   | 0.006 | -0.323   | 0.164 | 0.050   | 0.819 |
| 1-(1-enyl-palmitoyl)-2-oleoyl-GPC (P-16:0/18:1)*        | -0.350  | 0.070 | 0.000   | 0.000 | -0.409  | 0.072 | 0.000   | 0.000 | -0.393   | 0.153 | 0.011   | 0.738 |
| 1-(1-enyl-palmitoyl)-2-palmitoleoyl-GPC (P-16:0/16:1)*  | -0.232  | 0.082 | 0.005   | 0.034 | -0.287  | 0.084 | 0.001   | 0.008 | -0.338   | 0.180 | 0.062   | 0.819 |
| 1,5-anhydroglucitol (1,5-AG)                            | -0.309  | 0.079 | 0.000   | 0.002 | -0.357  | 0.081 | 0.000   | 0.000 | -0.333   | 0.174 | 0.057   | 0.819 |
| 1-arachidonylglycerol (20:4)                            | 0.263   | 0.079 | 0.001   | 0.011 | 0.257   | 0.084 | 0.003   | 0.018 | 0.055    | 0.181 | 0.760   | 0.982 |
| 1-carboxyethylisoleucine                                | 0.386   | 0.090 | 0.000   | 0.001 | 0.366   | 0.094 | 0.000   | 0.002 | 0.068    | 0.192 | 0.724   | 0.980 |
| 1-carboxyethylleucine                                   | 0.413   | 0.083 | 0.000   | 0.000 | 0.369   | 0.088 | 0.000   | 0.001 | -0.045   | 0.184 | 0.806   | 0.988 |
| 1-carboxyethylphenylalanine                             | 0.306   | 0.078 | 0.000   | 0.002 | 0.299   | 0.082 | 0.000   | 0.004 | 0.077    | 0.174 | 0.657   | 0.980 |
| 1-carboxyethylvaline                                    | 0.343   | 0.076 | 0.000   | 0.000 | 0.333   | 0.080 | 0.000   | 0.001 | 0.083    | 0.168 | 0.621   | 0.972 |
| 1-linolenylglycerol (18:3)                              | 0.218   | 0.075 | 0.004   | 0.029 | 0.248   | 0.078 | 0.002   | 0.014 | 0.218    | 0.173 | 0.210   | 0.841 |
| 1-linoleoylglycerol (18:2)                              | 0.315   | 0.075 | 0.000   | 0.001 | 0.336   | 0.077 | 0.000   | 0.001 | 0.212    | 0.166 | 0.202   | 0.841 |
| 1-linoleoyl-GPG (18:2)*                                 | 0.259   | 0.066 | 0.000   | 0.002 | 0.263   | 0.068 | 0.000   | 0.002 | 0.113    | 0.146 | 0.442   | 0.902 |
| 1-methylhistidine                                       | 0.215   | 0.080 | 0.008   | 0.047 | 0.203   | 0.084 | 0.017   | 0.082 | 0.021    | 0.179 | 0.909   | 0.992 |
| 1-methylurate                                           | 0.221   | 0.081 | 0.007   | 0.043 | 0.201   | 0.085 | 0.020   | 0.092 | -0.022   | 0.185 | 0.904   | 0.992 |
| 1-myristoyl-2-arachidonoyl-GPC (14:0/20:4)*             | 0.378   | 0.078 | 0.000   | 0.000 | 0.355   | 0.083 | 0.000   | 0.001 | 0.036    | 0.175 | 0.837   | 0.988 |
| 1-myristoyl-2-palmitoyl-GPC (14:0/16:0)                 | 0.282   | 0.077 | 0.000   | 0.004 | 0.304   | 0.080 | 0.000   | 0.003 | 0.205    | 0.170 | 0.232   | 0.844 |
| 1-oleoyl-2-docosahexaenoyl-GPC (18:1/22:6)*             | -0.368  | 0.080 | 0.000   | 0.000 | -0.411  | 0.083 | 0.000   | 0.000 | -0.329   | 0.177 | 0.064   | 0.819 |
| 1-oleoylglycerol (18:1)                                 | 0.304   | 0.071 | 0.000   | 0.001 | 0.354   | 0.073 | 0.000   | 0.000 | 0.338    | 0.156 | 0.032   | 0.738 |
| 1-palmitoleoylglycerol (16:1)*                          | 0.329   | 0.077 | 0.000   | 0.001 | 0.392   | 0.079 | 0.000   | 0.000 | 0.398    | 0.169 | 0.019   | 0.738 |
| 1-palmitoyl-2-arachidonoyl-GPC (16:0/20:4n6)            | 0.348   | 0.078 | 0.000   | 0.000 | 0.317   | 0.083 | 0.000   | 0.003 | -0.013   | 0.175 | 0.940   | 0.993 |
| 1-palmitoyl-2-dihomo-linolenoyl-GPC (16:0/20:3n3 or 6)* | 0.273   | 0.074 | 0.000   | 0.004 | 0.335   | 0.076 | 0.000   | 0.000 | 0.381    | 0.162 | 0.020   | 0.738 |
| 1-palmitoyl-2-linoleoyl-GPC (16:0/18:2)                 | 0.281   | 0.076 | 0.000   | 0.004 | 0.291   | 0.079 | 0.000   | 0.004 | 0.149    | 0.169 | 0.381   | 0.888 |
| 1-palmitoyl-2-oleoyl-GPE (16:0/18:1)                    | 0.231   | 0.076 | 0.003   | 0.021 | 0.268   | 0.079 | 0.001   | 0.008 | 0.252    | 0.168 | 0.136   | 0.819 |
| 1-palmitoyl-2-palmitoleoyl-GPC (16:0/16:1)*             | 0.220   | 0.072 | 0.003   | 0.020 | 0.253   | 0.074 | 0.001   | 0.008 | 0.229    | 0.159 | 0.152   | 0.819 |
| 1-palmitoyl-2-stearoyl-GPE (16:0/18:0)*                 | 0.320   | 0.083 | 0.000   | 0.002 | 0.326   | 0.087 | 0.000   | 0.003 | 0.133    | 0.183 | 0.468   | 0.902 |
| 1-stearoyl-2-arachidonoyl-GPC (18:0/20:4)               | 0.237   | 0.082 | 0.004   | 0.029 | 0.212   | 0.086 | 0.015   | 0.075 | -0.031   | 0.183 | 0.865   | 0.992 |
| 1-stearoyl-2-arachidonoyl-GPE (18:0/20:4)               | 0.326   | 0.079 | 0.000   | 0.001 | 0.342   | 0.082 | 0.000   | 0.001 | 0.191    | 0.175 | 0.277   | 0.869 |
| 1-stearoyl-2-arachidonoyl-GPI (18:0/20:4)               | 0.263   | 0.078 | 0.001   | 0.009 | 0.330   | 0.080 | 0.000   | 0.001 | 0.404    | 0.171 | 0.019   | 0.738 |

|                                                  |        |       |       |       |        |       |       |       |        |       |       |       |
|--------------------------------------------------|--------|-------|-------|-------|--------|-------|-------|-------|--------|-------|-------|-------|
| 1-stearoyl-2-docosahexaenoyl-GPE (18:0/22:6)*    | 0.309  | 0.073 | 0.000 | 0.001 | 0.321  | 0.076 | 0.000 | 0.001 | 0.167  | 0.162 | 0.306 | 0.873 |
| 1-stearoyl-2-linoleoyl-GPE (18:0/18:2)*          | 0.295  | 0.078 | 0.000 | 0.003 | 0.305  | 0.082 | 0.000 | 0.003 | 0.155  | 0.175 | 0.376 | 0.888 |
| 1-stearoyl-2-oleoyl-GPE (18:0/18:1)              | 0.332  | 0.075 | 0.000 | 0.000 | 0.326  | 0.078 | 0.000 | 0.001 | 0.095  | 0.167 | 0.571 | 0.947 |
| 1-stearoyl-2-oleoyl-GPS (18:0/18:1)              | 0.330  | 0.077 | 0.000 | 0.001 | 0.302  | 0.081 | 0.000 | 0.003 | -0.009 | 0.172 | 0.959 | 0.994 |
| 2,3-dihydroxy-5-methylthio-4-pentenoate (DMTPA)* | 0.308  | 0.082 | 0.000 | 0.003 | 0.340  | 0.085 | 0.000 | 0.001 | 0.257  | 0.181 | 0.157 | 0.819 |
| 2-aminoadipate                                   | 0.414  | 0.104 | 0.000 | 0.002 | 0.458  | 0.111 | 0.000 | 0.002 | 0.296  | 0.236 | 0.214 | 0.841 |
| 2-aminoheptanoate                                | 0.228  | 0.078 | 0.004 | 0.027 | 0.248  | 0.081 | 0.002 | 0.018 | 0.174  | 0.173 | 0.314 | 0.875 |
| 2-hydroxyarachidate*                             | 0.222  | 0.080 | 0.006 | 0.037 | 0.212  | 0.083 | 0.012 | 0.063 | 0.033  | 0.178 | 0.854 | 0.988 |
| 2-hydroxybehenate                                | 0.216  | 0.069 | 0.002 | 0.018 | 0.226  | 0.072 | 0.002 | 0.016 | 0.125  | 0.154 | 0.420 | 0.893 |
| 2-hydroxyphenylacetate                           | 0.244  | 0.087 | 0.006 | 0.037 | 0.207  | 0.091 | 0.024 | 0.105 | -0.079 | 0.197 | 0.690 | 0.980 |
| 2-linoleoylglycerol (18:2)                       | 0.213  | 0.079 | 0.008 | 0.047 | 0.201  | 0.083 | 0.017 | 0.081 | 0.022  | 0.176 | 0.903 | 0.992 |
| 2-methylbutyrylcarnitine (C5)                    | 0.320  | 0.076 | 0.000 | 0.001 | 0.355  | 0.080 | 0.000 | 0.000 | 0.251  | 0.168 | 0.138 | 0.819 |
| 2-oxoarginine*                                   | 0.368  | 0.071 | 0.000 | 0.000 | 0.346  | 0.075 | 0.000 | 0.000 | 0.031  | 0.158 | 0.845 | 0.988 |
| 3beta-hydroxy-5-cholestenoate                    | -0.227 | 0.074 | 0.003 | 0.020 | -0.227 | 0.077 | 0.004 | 0.026 | -0.080 | 0.165 | 0.629 | 0.974 |
| 3b-hydroxy-5-choleonic acid                      | -0.287 | 0.106 | 0.008 | 0.047 | -0.153 | 0.115 | 0.184 | 0.404 | 0.460  | 0.226 | 0.044 | 0.797 |
| 3-hydroxy-2-ethylpropionate                      | 0.396  | 0.082 | 0.000 | 0.000 | 0.411  | 0.085 | 0.000 | 0.000 | 0.212  | 0.182 | 0.244 | 0.847 |
| 3-hydroxyisobutyrate                             | 0.371  | 0.081 | 0.000 | 0.000 | 0.364  | 0.085 | 0.000 | 0.001 | 0.107  | 0.180 | 0.554 | 0.947 |
| 3-methyl-2-oxovalerate                           | 0.251  | 0.082 | 0.003 | 0.020 | 0.251  | 0.086 | 0.004 | 0.027 | 0.089  | 0.183 | 0.629 | 0.974 |
| 4-cholesten-3-one                                | 0.329  | 0.074 | 0.000 | 0.000 | 0.362  | 0.077 | 0.000 | 0.000 | 0.254  | 0.164 | 0.124 | 0.819 |
| 4-guanidinobutanoate                             | 0.279  | 0.074 | 0.000 | 0.003 | 0.259  | 0.078 | 0.001 | 0.009 | 0.014  | 0.165 | 0.931 | 0.993 |
| 4-hydroxyglutamate                               | 0.394  | 0.074 | 0.000 | 0.000 | 0.326  | 0.082 | 0.000 | 0.002 | -0.197 | 0.167 | 0.240 | 0.847 |
| 5-hydroxylysine                                  | 0.267  | 0.080 | 0.001 | 0.010 | 0.199  | 0.084 | 0.020 | 0.091 | -0.213 | 0.177 | 0.232 | 0.844 |
| 5-methylthioadenosine (MTA)                      | 0.222  | 0.070 | 0.002 | 0.016 | 0.274  | 0.073 | 0.000 | 0.003 | 0.313  | 0.155 | 0.045 | 0.811 |
| 6-oxopiperidine-2-carboxylate                    | 0.294  | 0.085 | 0.001 | 0.007 | 0.361  | 0.088 | 0.000 | 0.001 | 0.405  | 0.185 | 0.030 | 0.738 |
| alanine                                          | 0.230  | 0.084 | 0.007 | 0.042 | 0.237  | 0.087 | 0.007 | 0.044 | 0.116  | 0.187 | 0.535 | 0.943 |
| arabinose                                        | 0.284  | 0.090 | 0.002 | 0.017 | 0.248  | 0.090 | 0.007 | 0.042 | -0.001 | 0.190 | 0.998 | 0.999 |
| argininate*                                      | 0.262  | 0.079 | 0.001 | 0.011 | 0.291  | 0.082 | 0.000 | 0.005 | 0.229  | 0.176 | 0.194 | 0.839 |
| aspartate                                        | 0.252  | 0.071 | 0.001 | 0.006 | 0.277  | 0.074 | 0.000 | 0.003 | 0.206  | 0.158 | 0.195 | 0.840 |
| behenoyl dihydrosphingomyelin (d18:0/22:0)*      | 0.416  | 0.069 | 0.000 | 0.000 | 0.457  | 0.071 | 0.000 | 0.000 | 0.342  | 0.152 | 0.026 | 0.738 |
| beta-alanine                                     | 0.293  | 0.076 | 0.000 | 0.002 | 0.300  | 0.080 | 0.000 | 0.003 | 0.138  | 0.170 | 0.419 | 0.893 |
| beta-citrylglutamate                             | 0.250  | 0.073 | 0.001 | 0.008 | 0.240  | 0.076 | 0.002 | 0.014 | 0.047  | 0.162 | 0.771 | 0.983 |
| beta-hydroxyisovalerate                          | 0.357  | 0.075 | 0.000 | 0.000 | 0.341  | 0.079 | 0.000 | 0.001 | 0.057  | 0.168 | 0.735 | 0.981 |
| betaine                                          | -0.232 | 0.074 | 0.002 | 0.017 | -0.199 | 0.078 | 0.011 | 0.061 | 0.065  | 0.165 | 0.693 | 0.980 |

|                                                                |        |       |       |       |        |       |       |       |        |       |       |       |
|----------------------------------------------------------------|--------|-------|-------|-------|--------|-------|-------|-------|--------|-------|-------|-------|
| bilirubin                                                      | -0.246 | 0.080 | 0.002 | 0.019 | -0.282 | 0.083 | 0.001 | 0.008 | -0.256 | 0.177 | 0.149 | 0.819 |
| bilirubin (E,E)*                                               | -0.224 | 0.077 | 0.004 | 0.029 | -0.268 | 0.080 | 0.001 | 0.009 | -0.286 | 0.170 | 0.095 | 0.819 |
| bilirubin (E,Z or Z,E)*                                        | -0.252 | 0.080 | 0.002 | 0.016 | -0.273 | 0.083 | 0.001 | 0.010 | -0.190 | 0.177 | 0.285 | 0.870 |
| biliverdin                                                     | -0.231 | 0.073 | 0.002 | 0.016 | -0.244 | 0.076 | 0.002 | 0.013 | -0.143 | 0.163 | 0.380 | 0.888 |
| butyrylcarnitine (C4)                                          | 0.302  | 0.077 | 0.000 | 0.002 | 0.336  | 0.079 | 0.000 | 0.001 | 0.275  | 0.168 | 0.104 | 0.819 |
| carotene diol (2)                                              | -0.238 | 0.078 | 0.002 | 0.019 | -0.211 | 0.081 | 0.010 | 0.056 | 0.036  | 0.173 | 0.835 | 0.988 |
| ceramide (d16:1/24:1, d18:1/22:1)*                             | 0.159  | 0.057 | 0.006 | 0.037 | 0.172  | 0.058 | 0.004 | 0.025 | 0.127  | 0.127 | 0.319 | 0.875 |
| ceramide (d18:1/17:0, d17:1/18:0)*                             | 0.242  | 0.086 | 0.005 | 0.035 | 0.276  | 0.088 | 0.002 | 0.016 | 0.248  | 0.188 | 0.190 | 0.839 |
| ceramide (d18:1/20:0, d16:1/22:0, d20:1/18:0)*                 | 0.271  | 0.075 | 0.000 | 0.005 | 0.302  | 0.078 | 0.000 | 0.002 | 0.242  | 0.167 | 0.149 | 0.819 |
| cortisol                                                       | -0.243 | 0.081 | 0.003 | 0.022 | -0.270 | 0.084 | 0.001 | 0.012 | -0.216 | 0.179 | 0.230 | 0.844 |
| cortisone                                                      | -0.314 | 0.078 | 0.000 | 0.002 | -0.352 | 0.081 | 0.000 | 0.001 | -0.284 | 0.175 | 0.106 | 0.819 |
| cystathionine                                                  | 0.231  | 0.071 | 0.001 | 0.013 | 0.201  | 0.075 | 0.008 | 0.048 | -0.054 | 0.159 | 0.737 | 0.981 |
| cysteine-glutathione disulfide                                 | -0.234 | 0.078 | 0.003 | 0.023 | -0.199 | 0.082 | 0.016 | 0.079 | 0.076  | 0.176 | 0.665 | 0.980 |
| diacylglycerol (14:0/18:1, 16:0/16:1) [2]*                     | 0.267  | 0.094 | 0.005 | 0.034 | 0.323  | 0.099 | 0.001 | 0.013 | 0.334  | 0.222 | 0.135 | 0.819 |
| diacylglycerol (16:1/18:2 [2], 16:0/18:3 [1])*                 | 0.388  | 0.082 | 0.000 | 0.000 | 0.401  | 0.083 | 0.000 | 0.000 | 0.239  | 0.169 | 0.161 | 0.819 |
| dimethylglycine                                                | 0.258  | 0.081 | 0.002 | 0.015 | 0.277  | 0.085 | 0.001 | 0.011 | 0.179  | 0.181 | 0.323 | 0.877 |
| ergothioneine                                                  | 0.206  | 0.076 | 0.007 | 0.043 | 0.150  | 0.080 | 0.062 | 0.203 | -0.185 | 0.168 | 0.272 | 0.857 |
| erythritol                                                     | 0.258  | 0.087 | 0.004 | 0.026 | 0.268  | 0.091 | 0.004 | 0.025 | 0.142  | 0.195 | 0.468 | 0.902 |
| formiminoglutamate                                             | 0.441  | 0.073 | 0.000 | 0.000 | 0.414  | 0.077 | 0.000 | 0.000 | 0.036  | 0.162 | 0.827 | 0.988 |
| gamma-glutamyl-alpha-lysine                                    | 0.239  | 0.080 | 0.003 | 0.024 | 0.268  | 0.083 | 0.002 | 0.013 | 0.216  | 0.179 | 0.229 | 0.844 |
| gamma-glutamylglutamate                                        | 0.322  | 0.076 | 0.000 | 0.001 | 0.380  | 0.078 | 0.000 | 0.000 | 0.378  | 0.168 | 0.025 | 0.738 |
| gamma-glutamylglycine                                          | -0.260 | 0.080 | 0.001 | 0.012 | -0.295 | 0.083 | 0.000 | 0.005 | -0.251 | 0.177 | 0.158 | 0.819 |
| gamma-glutamylisoleucine*                                      | 0.419  | 0.075 | 0.000 | 0.000 | 0.458  | 0.078 | 0.000 | 0.000 | 0.330  | 0.166 | 0.049 | 0.819 |
| gamma-glutamylleucine                                          | 0.423  | 0.076 | 0.000 | 0.000 | 0.422  | 0.080 | 0.000 | 0.000 | 0.150  | 0.169 | 0.377 | 0.888 |
| gamma-glutamylphenylalanine                                    | 0.339  | 0.083 | 0.000 | 0.001 | 0.366  | 0.086 | 0.000 | 0.001 | 0.248  | 0.183 | 0.177 | 0.839 |
| gamma-glutamyltyrosine                                         | 0.268  | 0.076 | 0.001 | 0.006 | 0.306  | 0.079 | 0.000 | 0.002 | 0.270  | 0.168 | 0.111 | 0.819 |
| gamma-glutamylvaline                                           | 0.387  | 0.072 | 0.000 | 0.000 | 0.408  | 0.075 | 0.000 | 0.000 | 0.239  | 0.160 | 0.137 | 0.819 |
| gamma-tocopherol/beta-tocopherol                               | 0.205  | 0.067 | 0.003 | 0.020 | 0.261  | 0.069 | 0.000 | 0.003 | 0.331  | 0.148 | 0.026 | 0.738 |
| glucose                                                        | 0.284  | 0.082 | 0.001 | 0.007 | 0.282  | 0.086 | 0.001 | 0.011 | 0.090  | 0.183 | 0.623 | 0.972 |
| glucuronide of C10H18O2 (7)*                                   | -0.820 | 0.224 | 0.003 | 0.020 | -0.766 | 0.313 | 0.028 | 0.118 | 0.528  | 0.597 | 0.393 | 0.891 |
| glutamate                                                      | 0.428  | 0.072 | 0.000 | 0.000 | 0.456  | 0.074 | 0.000 | 0.000 | 0.283  | 0.159 | 0.076 | 0.819 |
| glycine                                                        | -0.325 | 0.077 | 0.000 | 0.001 | -0.358 | 0.079 | 0.000 | 0.000 | -0.269 | 0.170 | 0.115 | 0.819 |
| glycosyl-N-(2-hydroxynervonoyl)-sphingosine (d18:1/24:1(2OH))* | 0.211  | 0.055 | 0.000 | 0.002 | 0.207  | 0.057 | 0.000 | 0.004 | 0.060  | 0.122 | 0.623 | 0.972 |

|                                                     |        |       |       |       |        |       |       |       |        |       |       |       |
|-----------------------------------------------------|--------|-------|-------|-------|--------|-------|-------|-------|--------|-------|-------|-------|
| glycosyl-N-nervonoyl-sphingosine (d18:1/24:1)*      | -0.180 | 0.049 | 0.000 | 0.004 | -0.202 | 0.050 | 0.000 | 0.001 | -0.170 | 0.108 | 0.118 | 0.819 |
| gulonate*                                           | 0.251  | 0.086 | 0.004 | 0.029 | 0.228  | 0.090 | 0.012 | 0.065 | -0.010 | 0.193 | 0.958 | 0.994 |
| hexadecasphingosine (d16:1)*                        | 0.323  | 0.078 | 0.000 | 0.001 | 0.309  | 0.084 | 0.000 | 0.004 | 0.029  | 0.178 | 0.873 | 0.992 |
| homoarginine                                        | 0.299  | 0.081 | 0.000 | 0.004 | 0.315  | 0.084 | 0.000 | 0.003 | 0.186  | 0.180 | 0.305 | 0.873 |
| homocitrulline                                      | 0.298  | 0.089 | 0.001 | 0.010 | 0.290  | 0.093 | 0.002 | 0.017 | 0.071  | 0.199 | 0.722 | 0.980 |
| hydantoin-5-propionate                              | 0.338  | 0.087 | 0.000 | 0.002 | 0.290  | 0.090 | 0.002 | 0.013 | -0.073 | 0.189 | 0.701 | 0.980 |
| hydroxyasparagine                                   | 0.230  | 0.083 | 0.006 | 0.037 | 0.269  | 0.086 | 0.002 | 0.015 | 0.261  | 0.183 | 0.156 | 0.819 |
| isoleucine                                          | 0.416  | 0.082 | 0.000 | 0.000 | 0.411  | 0.086 | 0.000 | 0.000 | 0.130  | 0.183 | 0.480 | 0.902 |
| isovalerate (C5)                                    | 0.358  | 0.076 | 0.000 | 0.000 | 0.381  | 0.079 | 0.000 | 0.000 | 0.237  | 0.168 | 0.159 | 0.819 |
| isovalerylcarnitine (C5)                            | 0.406  | 0.078 | 0.000 | 0.000 | 0.408  | 0.082 | 0.000 | 0.000 | 0.157  | 0.173 | 0.366 | 0.888 |
| lactosyl-N-nervonoyl-sphingosine (d18:1/24:1)*      | -0.213 | 0.062 | 0.001 | 0.007 | -0.204 | 0.065 | 0.002 | 0.014 | -0.035 | 0.137 | 0.800 | 0.988 |
| lactosyl-N-palmitoyl-sphingosine (d18:1/16:0)       | -0.218 | 0.073 | 0.003 | 0.024 | -0.173 | 0.077 | 0.027 | 0.114 | 0.127  | 0.163 | 0.436 | 0.900 |
| leucine                                             | 0.430  | 0.081 | 0.000 | 0.000 | 0.421  | 0.085 | 0.000 | 0.000 | 0.115  | 0.180 | 0.525 | 0.942 |
| linoleoyl-arachidonoyl-glycerol (18:2/20:4) [1]*    | 0.374  | 0.073 | 0.000 | 0.000 | 0.412  | 0.076 | 0.000 | 0.000 | 0.310  | 0.162 | 0.057 | 0.819 |
| linoleoyl-arachidonoyl-glycerol (18:2/20:4) [2]*    | 0.404  | 0.073 | 0.000 | 0.000 | 0.391  | 0.077 | 0.000 | 0.000 | 0.088  | 0.163 | 0.592 | 0.961 |
| linoleoyl-docosahexaenoyl-glycerol (18:2/22:6) [2]* | 0.249  | 0.065 | 0.000 | 0.003 | 0.254  | 0.067 | 0.000 | 0.003 | 0.124  | 0.144 | 0.392 | 0.891 |
| linoleoyl-linolenoyl-glycerol (18:2/18:3) [2]*      | 0.272  | 0.073 | 0.000 | 0.004 | 0.274  | 0.076 | 0.000 | 0.004 | 0.115  | 0.163 | 0.480 | 0.902 |
| linoleoyl-linoleoyl-glycerol (18:2/18:2) [1]*       | 0.202  | 0.063 | 0.002 | 0.015 | 0.219  | 0.066 | 0.001 | 0.010 | 0.153  | 0.141 | 0.280 | 0.869 |
| lysine                                              | 0.250  | 0.085 | 0.004 | 0.026 | 0.281  | 0.088 | 0.002 | 0.013 | 0.235  | 0.188 | 0.213 | 0.841 |
| mannitol/sorbitol                                   | 0.223  | 0.084 | 0.008 | 0.049 | 0.194  | 0.088 | 0.028 | 0.118 | -0.052 | 0.187 | 0.780 | 0.986 |
| mannonate*                                          | 0.355  | 0.083 | 0.000 | 0.001 | 0.374  | 0.086 | 0.000 | 0.001 | 0.215  | 0.185 | 0.246 | 0.847 |
| mannose                                             | 0.279  | 0.083 | 0.001 | 0.009 | 0.314  | 0.086 | 0.000 | 0.004 | 0.262  | 0.183 | 0.156 | 0.819 |
| myristoyl dihydrosphingomyelin (d18:0/14:0)*        | 0.263  | 0.080 | 0.001 | 0.011 | 0.294  | 0.083 | 0.001 | 0.005 | 0.236  | 0.177 | 0.185 | 0.839 |
| myristoyl-linoleoyl-glycerol (14:0/18:2) [1]*       | 0.292  | 0.086 | 0.001 | 0.009 | 0.371  | 0.086 | 0.000 | 0.001 | 0.488  | 0.186 | 0.009 | 0.738 |
| N6,N6,N6-trimethyllysine                            | 0.275  | 0.077 | 0.000 | 0.005 | 0.319  | 0.080 | 0.000 | 0.002 | 0.298  | 0.171 | 0.082 | 0.819 |
| N-acetylalanine                                     | 0.233  | 0.085 | 0.007 | 0.043 | 0.220  | 0.089 | 0.015 | 0.074 | 0.027  | 0.190 | 0.889 | 0.992 |
| N-acetylcarnosine                                   | 0.346  | 0.061 | 0.000 | 0.000 | 0.345  | 0.064 | 0.000 | 0.000 | 0.124  | 0.136 | 0.363 | 0.888 |
| N-acetylglutamate                                   | 0.239  | 0.076 | 0.002 | 0.017 | 0.192  | 0.080 | 0.018 | 0.085 | -0.125 | 0.169 | 0.461 | 0.902 |
| N-acetylglycine                                     | -0.243 | 0.071 | 0.001 | 0.008 | -0.265 | 0.073 | 0.000 | 0.004 | -0.188 | 0.157 | 0.232 | 0.844 |
| N-acetylisoleucine                                  | 0.341  | 0.079 | 0.000 | 0.001 | 0.341  | 0.083 | 0.000 | 0.001 | 0.126  | 0.177 | 0.477 | 0.902 |
| N-acetylleucine                                     | 0.415  | 0.086 | 0.000 | 0.000 | 0.411  | 0.090 | 0.000 | 0.000 | 0.127  | 0.193 | 0.512 | 0.934 |
| N-acetylphenylalanine                               | 0.324  | 0.084 | 0.000 | 0.002 | 0.367  | 0.087 | 0.000 | 0.001 | 0.314  | 0.185 | 0.092 | 0.819 |
| N-acetylputrescine                                  | 0.274  | 0.087 | 0.002 | 0.016 | 0.293  | 0.091 | 0.001 | 0.012 | 0.188  | 0.194 | 0.332 | 0.880 |



|                                                     |        |       |       |       |        |       |       |       |        |       |       |       |
|-----------------------------------------------------|--------|-------|-------|-------|--------|-------|-------|-------|--------|-------|-------|-------|
| N-acetyltryptophan                                  | 0.232  | 0.082 | 0.005 | 0.036 | 0.298  | 0.085 | 0.001 | 0.006 | 0.384  | 0.181 | 0.036 | 0.761 |
| N-acetyltyrosine                                    | 0.306  | 0.091 | 0.001 | 0.010 | 0.299  | 0.092 | 0.001 | 0.012 | 0.119  | 0.197 | 0.548 | 0.947 |
| N-acetylvaline                                      | 0.266  | 0.079 | 0.001 | 0.009 | 0.290  | 0.082 | 0.001 | 0.005 | 0.206  | 0.175 | 0.241 | 0.847 |
| N-palmitoyl-sphinganine (d18:0/16:0)                | 0.378  | 0.078 | 0.000 | 0.000 | 0.381  | 0.081 | 0.000 | 0.000 | 0.149  | 0.173 | 0.388 | 0.889 |
| N-palmitoyl-sphingosine (d18:1/16:0)                | 0.239  | 0.081 | 0.004 | 0.026 | 0.275  | 0.084 | 0.001 | 0.011 | 0.252  | 0.179 | 0.161 | 0.819 |
| N-stearoyl-sphinganine (d18:0/18:0)*                | 0.502  | 0.076 | 0.000 | 0.000 | 0.562  | 0.077 | 0.000 | 0.000 | 0.471  | 0.165 | 0.005 | 0.738 |
| N-stearoyl-sphingosine (d18:1/18:0)*                | 0.367  | 0.075 | 0.000 | 0.000 | 0.404  | 0.078 | 0.000 | 0.000 | 0.304  | 0.167 | 0.069 | 0.819 |
| oleoyl-arachidonoyl-glycerol (18:1/20:4) [1]*       | 0.376  | 0.077 | 0.000 | 0.000 | 0.401  | 0.080 | 0.000 | 0.000 | 0.250  | 0.170 | 0.143 | 0.819 |
| oleoyl-arachidonoyl-glycerol (18:1/20:4) [2]*       | 0.421  | 0.077 | 0.000 | 0.000 | 0.436  | 0.080 | 0.000 | 0.000 | 0.222  | 0.170 | 0.194 | 0.839 |
| oleoyl-linolenoyl-glycerol (18:1/18:3) [2]*         | 0.293  | 0.093 | 0.002 | 0.017 | 0.297  | 0.096 | 0.002 | 0.018 | 0.134  | 0.216 | 0.536 | 0.943 |
| oleoyl-linoleoyl-glycerol (18:1/18:2) [1]           | 0.339  | 0.081 | 0.000 | 0.001 | 0.395  | 0.083 | 0.000 | 0.000 | 0.375  | 0.179 | 0.037 | 0.761 |
| oleoyl-linoleoyl-glycerol (18:1/18:2) [2]           | 0.359  | 0.081 | 0.000 | 0.000 | 0.406  | 0.084 | 0.000 | 0.000 | 0.345  | 0.179 | 0.055 | 0.819 |
| oleoyl-oleoyl-glycerol (18:1/18:1) [1]*             | 0.300  | 0.069 | 0.000 | 0.001 | 0.349  | 0.071 | 0.000 | 0.000 | 0.330  | 0.153 | 0.032 | 0.738 |
| oleoyl-oleoyl-glycerol (18:1/18:1) [2]*             | 0.237  | 0.064 | 0.000 | 0.004 | 0.295  | 0.066 | 0.000 | 0.000 | 0.349  | 0.140 | 0.014 | 0.738 |
| palmitoleoyl-arachidonoyl-glycerol (16:1/20:4) [2]* | 0.294  | 0.078 | 0.000 | 0.003 | 0.297  | 0.083 | 0.000 | 0.005 | 0.098  | 0.180 | 0.585 | 0.957 |
| palmitoleoyl-linoleoyl-glycerol (16:1/18:2) [1]*    | 0.306  | 0.079 | 0.000 | 0.002 | 0.375  | 0.080 | 0.000 | 0.000 | 0.427  | 0.172 | 0.014 | 0.738 |
| palmitoyl-arachidonoyl-glycerol (16:0/20:4) [1]*    | 0.345  | 0.096 | 0.000 | 0.005 | 0.333  | 0.098 | 0.001 | 0.009 | 0.102  | 0.209 | 0.626 | 0.973 |
| palmitoyl-arachidonoyl-glycerol (16:0/20:4) [2]*    | 0.412  | 0.078 | 0.000 | 0.000 | 0.417  | 0.081 | 0.000 | 0.000 | 0.170  | 0.173 | 0.325 | 0.877 |
| palmitoyl-linoleoyl-glycerol (16:0/18:2) [1]*       | 0.378  | 0.078 | 0.000 | 0.000 | 0.443  | 0.079 | 0.000 | 0.000 | 0.434  | 0.170 | 0.012 | 0.738 |
| palmitoyl-linoleoyl-glycerol (16:0/18:2) [2]*       | 0.385  | 0.080 | 0.000 | 0.000 | 0.444  | 0.081 | 0.000 | 0.000 | 0.412  | 0.174 | 0.019 | 0.738 |
| palmitoyl-oleoyl-glycerol (16:0/18:1) [1]*          | 0.379  | 0.074 | 0.000 | 0.000 | 0.437  | 0.075 | 0.000 | 0.000 | 0.400  | 0.162 | 0.014 | 0.738 |
| palmitoyl-oleoyl-glycerol (16:0/18:1) [2]*          | 0.359  | 0.076 | 0.000 | 0.000 | 0.420  | 0.077 | 0.000 | 0.000 | 0.411  | 0.166 | 0.014 | 0.738 |
| pantothenate (Vitamin B5)                           | 0.206  | 0.077 | 0.008 | 0.048 | 0.215  | 0.080 | 0.008 | 0.047 | 0.116  | 0.172 | 0.498 | 0.917 |
| phenylalanine                                       | 0.316  | 0.080 | 0.000 | 0.002 | 0.317  | 0.084 | 0.000 | 0.003 | 0.122  | 0.178 | 0.493 | 0.912 |
| proline                                             | 0.309  | 0.074 | 0.000 | 0.001 | 0.296  | 0.077 | 0.000 | 0.003 | 0.052  | 0.164 | 0.752 | 0.982 |
| prolylglycine                                       | 0.264  | 0.083 | 0.002 | 0.015 | 0.243  | 0.087 | 0.006 | 0.038 | -0.010 | 0.186 | 0.957 | 0.994 |
| prolylhydroxyproline                                | 0.212  | 0.076 | 0.006 | 0.037 | 0.167  | 0.080 | 0.038 | 0.144 | -0.129 | 0.169 | 0.447 | 0.902 |
| propionylcarnitine (C3)                             | 0.251  | 0.077 | 0.001 | 0.012 | 0.304  | 0.079 | 0.000 | 0.002 | 0.336  | 0.169 | 0.049 | 0.819 |
| pyridoxate                                          | 0.251  | 0.090 | 0.006 | 0.039 | 0.282  | 0.094 | 0.003 | 0.022 | 0.234  | 0.201 | 0.245 | 0.847 |
| retinol (Vitamin A)                                 | 0.220  | 0.071 | 0.002 | 0.019 | 0.188  | 0.075 | 0.013 | 0.067 | -0.066 | 0.158 | 0.677 | 0.980 |
| S-adenosylhomocysteine (SAH)                        | 0.295  | 0.103 | 0.005 | 0.033 | 0.253  | 0.107 | 0.020 | 0.092 | -0.089 | 0.236 | 0.707 | 0.980 |
| serine                                              | -0.218 | 0.082 | 0.008 | 0.049 | -0.263 | 0.085 | 0.002 | 0.017 | -0.282 | 0.181 | 0.122 | 0.819 |
| sphingadienine                                      | 0.247  | 0.073 | 0.001 | 0.009 | 0.252  | 0.076 | 0.001 | 0.010 | 0.111  | 0.162 | 0.496 | 0.916 |

|                                                     |        |       |       |       |        |       |       |       |        |       |       |       |
|-----------------------------------------------------|--------|-------|-------|-------|--------|-------|-------|-------|--------|-------|-------|-------|
| sphingomyelin (d17:2/16:0, d18:2/15:0)*             | 0.237  | 0.065 | 0.000 | 0.004 | 0.220  | 0.068 | 0.001 | 0.012 | 0.009  | 0.145 | 0.952 | 0.993 |
| sphingomyelin (d18:0/18:0, d19:0/17:0)*             | 0.447  | 0.072 | 0.000 | 0.000 | 0.488  | 0.075 | 0.000 | 0.000 | 0.351  | 0.159 | 0.029 | 0.738 |
| sphingomyelin (d18:0/20:0, d16:0/22:0)*             | 0.491  | 0.074 | 0.000 | 0.000 | 0.518  | 0.077 | 0.000 | 0.000 | 0.301  | 0.163 | 0.066 | 0.819 |
| sphingomyelin (d18:1/14:0, d16:1/16:0)*             | 0.253  | 0.075 | 0.001 | 0.009 | 0.283  | 0.078 | 0.000 | 0.004 | 0.230  | 0.166 | 0.168 | 0.826 |
| sphingomyelin (d18:1/18:1, d18:2/18:0)              | 0.293  | 0.072 | 0.000 | 0.001 | 0.282  | 0.075 | 0.000 | 0.003 | 0.057  | 0.160 | 0.724 | 0.980 |
| sphingomyelin (d18:1/21:0, d17:1/22:0, d16:1/23:0)* | 0.173  | 0.057 | 0.003 | 0.022 | 0.162  | 0.060 | 0.008 | 0.046 | 0.012  | 0.128 | 0.928 | 0.993 |
| sphingomyelin (d18:2/14:0, d18:1/14:1)*             | 0.291  | 0.069 | 0.000 | 0.001 | 0.284  | 0.072 | 0.000 | 0.002 | 0.074  | 0.154 | 0.632 | 0.974 |
| sphingomyelin (d18:2/21:0, d16:2/23:0)*             | 0.176  | 0.064 | 0.007 | 0.043 | 0.111  | 0.068 | 0.105 | 0.285 | -0.235 | 0.143 | 0.101 | 0.819 |
| stearoyl-arachidonoyl-glycerol (18:0/20:4) [1]*     | 0.229  | 0.075 | 0.002 | 0.019 | 0.197  | 0.078 | 0.013 | 0.066 | -0.062 | 0.166 | 0.709 | 0.980 |
| stearoyl-arachidonoyl-glycerol (18:0/20:4) [2]*     | 0.221  | 0.083 | 0.008 | 0.049 | 0.201  | 0.087 | 0.021 | 0.096 | -0.007 | 0.184 | 0.972 | 0.995 |
| tyrosine                                            | 0.304  | 0.087 | 0.001 | 0.007 | 0.304  | 0.091 | 0.001 | 0.009 | 0.113  | 0.194 | 0.562 | 0.947 |
| urate                                               | 0.244  | 0.067 | 0.000 | 0.004 | 0.249  | 0.070 | 0.000 | 0.005 | 0.115  | 0.149 | 0.440 | 0.900 |
| valine                                              | 0.438  | 0.082 | 0.000 | 0.000 | 0.425  | 0.087 | 0.000 | 0.000 | 0.101  | 0.183 | 0.584 | 0.957 |
| X - 11442                                           | -0.229 | 0.085 | 0.008 | 0.046 | -0.236 | 0.088 | 0.008 | 0.048 | -0.117 | 0.189 | 0.536 | 0.943 |
| X - 12063                                           | 0.291  | 0.076 | 0.000 | 0.002 | 0.342  | 0.078 | 0.000 | 0.000 | 0.337  | 0.166 | 0.044 | 0.797 |
| X - 12170                                           | 0.261  | 0.087 | 0.003 | 0.022 | 0.249  | 0.091 | 0.007 | 0.042 | 0.041  | 0.193 | 0.834 | 0.988 |
| X - 12411                                           | 0.306  | 0.080 | 0.000 | 0.002 | 0.292  | 0.083 | 0.001 | 0.006 | 0.047  | 0.178 | 0.791 | 0.988 |
| X - 12456                                           | 0.343  | 0.100 | 0.001 | 0.009 | 0.413  | 0.108 | 0.000 | 0.003 | 0.344  | 0.211 | 0.106 | 0.819 |
| X - 12524                                           | 0.282  | 0.076 | 0.000 | 0.003 | 0.252  | 0.080 | 0.002 | 0.014 | -0.033 | 0.169 | 0.845 | 0.988 |
| X - 12680                                           | 0.216  | 0.080 | 0.008 | 0.046 | 0.183  | 0.084 | 0.031 | 0.127 | -0.069 | 0.176 | 0.697 | 0.980 |
| X - 12689                                           | 0.306  | 0.073 | 0.000 | 0.001 | 0.290  | 0.076 | 0.000 | 0.003 | 0.037  | 0.162 | 0.819 | 0.988 |
| X - 13737                                           | 0.238  | 0.082 | 0.004 | 0.029 | 0.285  | 0.085 | 0.001 | 0.009 | 0.301  | 0.183 | 0.102 | 0.819 |
| X - 13844                                           | 0.386  | 0.127 | 0.004 | 0.027 | 0.488  | 0.127 | 0.000 | 0.004 | 0.792  | 0.338 | 0.023 | 0.738 |
| X - 16946                                           | -0.254 | 0.079 | 0.002 | 0.015 | -0.267 | 0.083 | 0.002 | 0.013 | -0.149 | 0.177 | 0.400 | 0.893 |
| X - 17340                                           | 0.265  | 0.094 | 0.006 | 0.037 | 0.291  | 0.099 | 0.004 | 0.026 | 0.206  | 0.209 | 0.325 | 0.877 |
| X - 18345                                           | 0.411  | 0.112 | 0.000 | 0.004 | 0.376  | 0.118 | 0.002 | 0.014 | -0.109 | 0.298 | 0.716 | 0.980 |
| X - 18886                                           | 0.358  | 0.079 | 0.000 | 0.000 | 0.358  | 0.082 | 0.000 | 0.001 | 0.130  | 0.175 | 0.460 | 0.902 |
| X - 18922                                           | 0.228  | 0.068 | 0.001 | 0.009 | 0.269  | 0.070 | 0.000 | 0.002 | 0.272  | 0.149 | 0.069 | 0.819 |
| X - 21829                                           | 0.330  | 0.079 | 0.000 | 0.001 | 0.356  | 0.082 | 0.000 | 0.001 | 0.247  | 0.173 | 0.157 | 0.819 |
| X - 22775                                           | 0.264  | 0.091 | 0.004 | 0.029 | 0.255  | 0.095 | 0.008 | 0.049 | 0.050  | 0.203 | 0.806 | 0.988 |
| X - 23294                                           | 0.326  | 0.116 | 0.006 | 0.039 | 0.365  | 0.124 | 0.004 | 0.029 | 0.252  | 0.273 | 0.358 | 0.887 |
| X - 23590                                           | 0.409  | 0.084 | 0.000 | 0.000 | 0.436  | 0.088 | 0.000 | 0.000 | 0.270  | 0.188 | 0.153 | 0.819 |
| X - 23593                                           | 0.348  | 0.081 | 0.000 | 0.001 | 0.306  | 0.086 | 0.000 | 0.005 | -0.064 | 0.181 | 0.725 | 0.980 |

|           |        |       |       |       |        |       |       |       |        |       |       |       |
|-----------|--------|-------|-------|-------|--------|-------|-------|-------|--------|-------|-------|-------|
| X - 23680 | 0.188  | 0.070 | 0.008 | 0.049 | 0.135  | 0.074 | 0.071 | 0.217 | -0.176 | 0.156 | 0.262 | 0.848 |
| X - 24106 | -0.235 | 0.075 | 0.002 | 0.017 | -0.207 | 0.079 | 0.010 | 0.054 | 0.045  | 0.168 | 0.790 | 0.988 |
| X - 24328 | 0.221  | 0.070 | 0.002 | 0.015 | 0.232  | 0.072 | 0.002 | 0.013 | 0.130  | 0.154 | 0.399 | 0.893 |
| X - 24588 | 0.286  | 0.080 | 0.000 | 0.006 | 0.293  | 0.084 | 0.001 | 0.006 | 0.137  | 0.179 | 0.444 | 0.902 |
| X - 24728 | 0.283  | 0.078 | 0.000 | 0.004 | 0.287  | 0.081 | 0.001 | 0.005 | 0.122  | 0.174 | 0.485 | 0.905 |
| X - 25371 | 0.307  | 0.087 | 0.001 | 0.006 | 0.355  | 0.090 | 0.000 | 0.002 | 0.331  | 0.192 | 0.086 | 0.819 |

**FDR-adjusted p-value>=0.05 for BMI**

|                                                        |        |       |       |       |        |       |       |       |        |       |       |       |
|--------------------------------------------------------|--------|-------|-------|-------|--------|-------|-------|-------|--------|-------|-------|-------|
| (14 or 15)-methylpalmitate (a17:0 or i17:0)            | -0.045 | 0.082 | 0.582 | 0.754 | -0.033 | 0.086 | 0.696 | 0.838 | 0.037  | 0.183 | 0.838 | 0.988 |
| (16 or 17)-methylstearate (a19:0 or i19:0)             | -0.023 | 0.077 | 0.768 | 0.877 | -0.027 | 0.080 | 0.741 | 0.870 | -0.026 | 0.172 | 0.881 | 0.992 |
| (2,4 or 2,5)-dimethylphenol sulfate                    | 0.076  | 0.075 | 0.309 | 0.530 | 0.062  | 0.077 | 0.422 | 0.644 | -0.045 | 0.176 | 0.799 | 0.988 |
| (N(1) + N(8))-acetylspermidine                         | 0.098  | 0.086 | 0.254 | 0.472 | 0.147  | 0.089 | 0.099 | 0.278 | 0.260  | 0.190 | 0.173 | 0.831 |
| 1-(1-enyl-oleoyl)-GPE (P-18:1)*                        | -0.033 | 0.079 | 0.676 | 0.810 | -0.025 | 0.082 | 0.760 | 0.881 | 0.024  | 0.176 | 0.892 | 0.992 |
| 1-(1-enyl-palmitoyl)-2-arachidonoyl-GPC (P-16:0/20:4)* | 0.026  | 0.077 | 0.739 | 0.857 | -0.031 | 0.080 | 0.699 | 0.838 | -0.248 | 0.170 | 0.145 | 0.819 |
| 1-(1-enyl-palmitoyl)-2-arachidonoyl-GPE (P-16:0/20:4)* | 0.143  | 0.075 | 0.058 | 0.192 | 0.137  | 0.078 | 0.081 | 0.240 | 0.025  | 0.167 | 0.882 | 0.992 |
| 1-(1-enyl-palmitoyl)-2-linoleoyl-GPE (P-16:0/18:2)*    | 0.067  | 0.079 | 0.399 | 0.608 | 0.042  | 0.082 | 0.606 | 0.771 | -0.086 | 0.175 | 0.624 | 0.972 |
| 1-(1-enyl-palmitoyl)-2-oleoyl-GPE (P-16:0/18:1)*       | 0.135  | 0.072 | 0.063 | 0.200 | 0.096  | 0.076 | 0.204 | 0.428 | -0.128 | 0.161 | 0.427 | 0.895 |
| 1-(1-enyl-palmitoyl)-2-palmitoyl-GPC (P-16:0/16:0)*    | -0.176 | 0.079 | 0.027 | 0.116 | -0.213 | 0.082 | 0.010 | 0.055 | -0.235 | 0.175 | 0.180 | 0.839 |
| 1-(1-enyl-palmitoyl)-GPC (P-16:0)*                     | -0.161 | 0.084 | 0.058 | 0.192 | -0.145 | 0.088 | 0.102 | 0.281 | 0.017  | 0.188 | 0.928 | 0.993 |
| 1-(1-enyl-palmitoyl)-GPE (P-16:0)*                     | 0.016  | 0.082 | 0.841 | 0.920 | 0.039  | 0.086 | 0.652 | 0.804 | 0.107  | 0.183 | 0.560 | 0.947 |
| 1-(1-enyl-stearoyl)-2-arachidonoyl-GPE (P-18:0/20:4)*  | 0.041  | 0.075 | 0.583 | 0.754 | 0.045  | 0.079 | 0.565 | 0.755 | 0.033  | 0.168 | 0.847 | 0.988 |
| 1-(1-enyl-stearoyl)-2-linoleoyl-GPE (P-18:0/18:2)*     | 0.037  | 0.072 | 0.613 | 0.775 | 0.049  | 0.075 | 0.518 | 0.730 | 0.068  | 0.161 | 0.672 | 0.980 |
| 1-(1-enyl-stearoyl)-2-oleoyl-GPE (P-18:0/18:1)         | 0.037  | 0.062 | 0.549 | 0.726 | 0.052  | 0.064 | 0.421 | 0.644 | 0.081  | 0.137 | 0.557 | 0.947 |
| 1-(1-enyl-stearoyl)-GPE (P-18:0)*                      | -0.124 | 0.077 | 0.110 | 0.289 | -0.092 | 0.081 | 0.254 | 0.483 | 0.099  | 0.172 | 0.564 | 0.947 |
| 1,2,3-benzenetriol sulfate (2)                         | 0.003  | 0.089 | 0.972 | 0.988 | -0.050 | 0.092 | 0.586 | 0.765 | -0.243 | 0.196 | 0.218 | 0.844 |
| 1,2-dilinoeoyl-GPC (18:2/18:2)                         | -0.050 | 0.079 | 0.529 | 0.713 | -0.049 | 0.082 | 0.553 | 0.749 | -0.014 | 0.176 | 0.936 | 0.993 |
| 1,2-dilinoeoyl-GPE (18:2/18:2)*                        | 0.173  | 0.083 | 0.038 | 0.142 | 0.173  | 0.086 | 0.046 | 0.168 | 0.066  | 0.184 | 0.721 | 0.980 |
| 1,2-dipalmitoyl-GPC (16:0/16:0)                        | 0.049  | 0.078 | 0.531 | 0.713 | 0.053  | 0.081 | 0.518 | 0.730 | 0.035  | 0.174 | 0.842 | 0.988 |
| 1,2-dipalmitoyl-GPE (16:0/16:0)*                       | 0.228  | 0.090 | 0.012 | 0.064 | 0.261  | 0.094 | 0.006 | 0.038 | 0.222  | 0.197 | 0.262 | 0.848 |
| 1,3-dimethylurate                                      | 0.285  | 0.164 | 0.090 | 0.254 | 0.335  | 0.171 | 0.057 | 0.193 | 0.408  | 0.459 | 0.379 | 0.888 |
| 1,7-dimethylurate                                      | 0.214  | 0.128 | 0.100 | 0.276 | 0.194  | 0.136 | 0.158 | 0.371 | -0.074 | 0.337 | 0.826 | 0.988 |
| 10-heptadecenoate (17:1n7)                             | -0.021 | 0.079 | 0.789 | 0.886 | 0.002  | 0.082 | 0.983 | 0.989 | 0.097  | 0.176 | 0.583 | 0.957 |
| 10-nonadecenoate (19:1n9)                              | -0.079 | 0.079 | 0.317 | 0.541 | -0.067 | 0.082 | 0.417 | 0.643 | 0.027  | 0.176 | 0.878 | 0.992 |

|                                               |        |       |       |       |        |       |       |       |        |       |       |       |
|-----------------------------------------------|--------|-------|-------|-------|--------|-------|-------|-------|--------|-------|-------|-------|
| 10-undecenoate (11:1n1)                       | -0.012 | 0.070 | 0.866 | 0.930 | 0.004  | 0.073 | 0.954 | 0.972 | 0.069  | 0.155 | 0.660 | 0.980 |
| 12,13-DiHOME                                  | -0.086 | 0.077 | 0.268 | 0.486 | -0.080 | 0.081 | 0.325 | 0.566 | -0.001 | 0.177 | 0.998 | 0.999 |
| 13-HODE + 9-HODE                              | 0.106  | 0.088 | 0.229 | 0.446 | 0.117  | 0.091 | 0.202 | 0.427 | 0.088  | 0.195 | 0.653 | 0.980 |
| 16a-hydroxy DHEA 3-sulfate                    | 0.138  | 0.072 | 0.057 | 0.191 | 0.074  | 0.075 | 0.324 | 0.566 | -0.239 | 0.159 | 0.135 | 0.819 |
| 16-hydroxypalmitate                           | -0.002 | 0.081 | 0.981 | 0.990 | 0.010  | 0.084 | 0.904 | 0.955 | 0.055  | 0.180 | 0.763 | 0.982 |
| 17alpha-hydroxypregnenolone 3-sulfate         | 0.062  | 0.108 | 0.568 | 0.742 | 0.103  | 0.113 | 0.363 | 0.601 | 0.187  | 0.226 | 0.411 | 0.893 |
| 1-arachidonoyl-GPA (20:4)                     | 0.032  | 0.099 | 0.742 | 0.860 | 0.082  | 0.102 | 0.423 | 0.644 | 0.252  | 0.225 | 0.266 | 0.848 |
| 1-arachidonoyl-GPC* (20:4)*                   | 0.003  | 0.083 | 0.971 | 0.988 | -0.013 | 0.087 | 0.885 | 0.946 | -0.070 | 0.186 | 0.706 | 0.980 |
| 1-arachidonoyl-GPE (20:4n6)*                  | 0.066  | 0.077 | 0.388 | 0.598 | 0.082  | 0.080 | 0.307 | 0.547 | 0.094  | 0.171 | 0.583 | 0.957 |
| 1-arachidonoyl-GPI* (20:4)*                   | 0.187  | 0.080 | 0.021 | 0.094 | 0.232  | 0.083 | 0.006 | 0.037 | 0.271  | 0.177 | 0.128 | 0.819 |
| 1-carboxyethyltyrosine                        | 0.253  | 0.100 | 0.012 | 0.065 | 0.234  | 0.106 | 0.029 | 0.121 | 0.002  | 0.216 | 0.991 | 0.998 |
| 1-dihomo-linolenylglycerol (20:3)             | 0.118  | 0.097 | 0.222 | 0.437 | 0.125  | 0.101 | 0.219 | 0.443 | 0.070  | 0.219 | 0.749 | 0.982 |
| 1-dihomo-linoleoylglycerol (20:2)             | 0.060  | 0.109 | 0.582 | 0.753 | 0.066  | 0.113 | 0.562 | 0.755 | 0.047  | 0.234 | 0.841 | 0.988 |
| 1-docosahexaenoylglycerol (22:6)              | 0.225  | 0.105 | 0.033 | 0.131 | 0.185  | 0.111 | 0.096 | 0.271 | -0.111 | 0.237 | 0.642 | 0.980 |
| 1H-indole-7-acetic acid                       | 0.026  | 0.106 | 0.805 | 0.897 | -0.020 | 0.115 | 0.863 | 0.941 | -0.226 | 0.257 | 0.381 | 0.888 |
| 1-lignoceroyl-GPC (24:0)                      | -0.100 | 0.068 | 0.142 | 0.337 | -0.099 | 0.071 | 0.163 | 0.379 | -0.029 | 0.157 | 0.854 | 0.988 |
| 1-linolenoyl-GPC (18:3)*                      | 0.057  | 0.080 | 0.477 | 0.674 | 0.044  | 0.083 | 0.595 | 0.765 | -0.037 | 0.178 | 0.837 | 0.988 |
| 1-linoleoyl-2-arachidonoyl-GPC (18:2/20:4n6)* | 0.090  | 0.083 | 0.280 | 0.503 | 0.059  | 0.087 | 0.498 | 0.711 | -0.110 | 0.186 | 0.555 | 0.947 |
| 1-linoleoyl-2-linolenoyl-GPC (18:2/18:3)*     | 0.046  | 0.076 | 0.542 | 0.721 | 0.010  | 0.079 | 0.903 | 0.955 | -0.149 | 0.168 | 0.375 | 0.888 |
| 1-linoleoyl-GPA (18:2)*                       | -0.162 | 0.085 | 0.057 | 0.192 | -0.128 | 0.089 | 0.150 | 0.359 | 0.102  | 0.192 | 0.596 | 0.961 |
| 1-linoleoyl-GPC (18:2)                        | -0.084 | 0.093 | 0.368 | 0.584 | -0.076 | 0.097 | 0.435 | 0.658 | 0.007  | 0.207 | 0.973 | 0.995 |
| 1-linoleoyl-GPE (18:2)*                       | 0.046  | 0.084 | 0.588 | 0.756 | 0.072  | 0.087 | 0.408 | 0.635 | 0.139  | 0.187 | 0.457 | 0.902 |
| 1-linoleoyl-GPI* (18:2)*                      | 0.131  | 0.076 | 0.085 | 0.245 | 0.141  | 0.079 | 0.074 | 0.224 | 0.097  | 0.168 | 0.567 | 0.947 |
| 1-methyl-4-imidazoleacetate                   | 0.198  | 0.089 | 0.028 | 0.118 | 0.206  | 0.093 | 0.028 | 0.118 | 0.109  | 0.199 | 0.585 | 0.957 |
| 1-methyl-5-imidazoleacetate                   | 0.017  | 0.104 | 0.867 | 0.930 | -0.041 | 0.108 | 0.709 | 0.845 | -0.264 | 0.234 | 0.260 | 0.848 |
| 1-methyladenosine                             | 0.137  | 0.096 | 0.154 | 0.350 | 0.184  | 0.099 | 0.066 | 0.208 | 0.262  | 0.213 | 0.219 | 0.844 |
| 1-methylnicotinamide                          | -0.149 | 0.078 | 0.058 | 0.192 | -0.155 | 0.081 | 0.058 | 0.196 | -0.083 | 0.174 | 0.635 | 0.976 |
| 1-oleoyl-2-linoleoyl-GPE (18:1/18:2)*         | 0.154  | 0.084 | 0.068 | 0.212 | 0.140  | 0.087 | 0.112 | 0.294 | -0.008 | 0.187 | 0.967 | 0.995 |
| 1-oleoylglycerophosphate (18:1)               | -0.083 | 0.106 | 0.435 | 0.636 | -0.061 | 0.111 | 0.584 | 0.765 | 0.095  | 0.259 | 0.716 | 0.980 |
| 1-oleoyl-GPC (18:1)                           | -0.167 | 0.064 | 0.010 | 0.055 | -0.142 | 0.067 | 0.036 | 0.141 | 0.054  | 0.143 | 0.704 | 0.980 |
| 1-oleoyl-GPE (18:1)                           | 0.071  | 0.075 | 0.341 | 0.557 | 0.060  | 0.078 | 0.443 | 0.663 | -0.026 | 0.167 | 0.875 | 0.992 |
| 1-oleoyl-GPG (18:1)*                          | 0.166  | 0.072 | 0.023 | 0.102 | 0.183  | 0.076 | 0.017 | 0.082 | 0.132  | 0.162 | 0.416 | 0.893 |
| 1-oleoyl-GPI (18:1)*                          | 0.117  | 0.074 | 0.117 | 0.299 | 0.114  | 0.077 | 0.142 | 0.346 | 0.029  | 0.166 | 0.863 | 0.991 |

|                                                |        |       |       |       |        |       |       |       |        |       |       |       |
|------------------------------------------------|--------|-------|-------|-------|--------|-------|-------|-------|--------|-------|-------|-------|
| 1-palmitoleoyl-2-linolenoyl-GPC (16:1/18:3)*   | 0.108  | 0.077 | 0.160 | 0.357 | 0.110  | 0.080 | 0.170 | 0.384 | 0.049  | 0.166 | 0.770 | 0.983 |
| 1-palmitoleoyl-GPC* (16:1)*                    | -0.003 | 0.078 | 0.973 | 0.988 | 0.065  | 0.081 | 0.423 | 0.644 | 0.309  | 0.173 | 0.076 | 0.819 |
| 1-palmitoyl-2-arachidonoyl-GPE (16:0/20:4)*    | 0.219  | 0.083 | 0.009 | 0.051 | 0.245  | 0.086 | 0.005 | 0.032 | 0.198  | 0.184 | 0.282 | 0.869 |
| 1-palmitoyl-2-arachidonoyl-GPI (16:0/20:4)*    | 0.183  | 0.079 | 0.022 | 0.097 | 0.253  | 0.081 | 0.002 | 0.016 | 0.387  | 0.173 | 0.026 | 0.738 |
| 1-palmitoyl-2-docosahexaenoyl-GPC (16:0/22:6)  | 0.128  | 0.069 | 0.066 | 0.207 | 0.117  | 0.072 | 0.108 | 0.289 | -0.005 | 0.155 | 0.974 | 0.995 |
| 1-palmitoyl-2-docosahexaenoyl-GPE (16:0/22:6)* | 0.207  | 0.080 | 0.011 | 0.059 | 0.240  | 0.083 | 0.005 | 0.030 | 0.225  | 0.179 | 0.209 | 0.841 |
| 1-palmitoyl-2-linoleoyl-GPE (16:0/18:2)        | 0.193  | 0.082 | 0.020 | 0.093 | 0.235  | 0.085 | 0.006 | 0.040 | 0.259  | 0.182 | 0.156 | 0.819 |
| 1-palmitoyl-2-linoleoyl-GPI (16:0/18:2)        | 0.074  | 0.077 | 0.340 | 0.557 | 0.115  | 0.080 | 0.153 | 0.362 | 0.215  | 0.171 | 0.211 | 0.841 |
| 1-palmitoyl-2-oleoyl-GPC (16:0/18:1)           | 0.116  | 0.062 | 0.062 | 0.199 | 0.152  | 0.064 | 0.019 | 0.090 | 0.204  | 0.138 | 0.140 | 0.819 |
| 1-palmitoyl-2-oleoyl-GPI (16:0/18:1)*          | 0.167  | 0.073 | 0.024 | 0.105 | 0.218  | 0.076 | 0.005 | 0.030 | 0.297  | 0.164 | 0.071 | 0.819 |
| 1-palmitoyl-2-stearoyl-GPC (16:0/18:0)         | 0.076  | 0.083 | 0.364 | 0.582 | 0.142  | 0.086 | 0.102 | 0.281 | 0.329  | 0.184 | 0.076 | 0.819 |
| 1-palmitoyl-GPC (16:0)                         | 0.078  | 0.094 | 0.409 | 0.617 | 0.155  | 0.098 | 0.114 | 0.298 | 0.379  | 0.208 | 0.070 | 0.819 |
| 1-palmitoyl-GPE (16:0)                         | 0.059  | 0.086 | 0.496 | 0.688 | 0.101  | 0.090 | 0.259 | 0.490 | 0.216  | 0.192 | 0.262 | 0.848 |
| 1-palmitoyl-GPG (16:0)*                        | 0.171  | 0.086 | 0.047 | 0.164 | 0.172  | 0.089 | 0.054 | 0.186 | 0.073  | 0.186 | 0.696 | 0.980 |
| 1-palmitoyl-GPI* (16:0)                        | 0.057  | 0.083 | 0.490 | 0.683 | 0.105  | 0.087 | 0.229 | 0.458 | 0.229  | 0.183 | 0.211 | 0.841 |
| 1-ribosyl-imidazoleacetate*                    | 0.148  | 0.086 | 0.089 | 0.250 | 0.189  | 0.089 | 0.036 | 0.142 | 0.241  | 0.192 | 0.210 | 0.841 |
| 1-stearoyl-2-docosahexaenoyl-GPC (18:0/22:6)   | 0.089  | 0.072 | 0.217 | 0.432 | 0.082  | 0.075 | 0.273 | 0.505 | 0.002  | 0.160 | 0.990 | 0.998 |
| 1-stearoyl-2-linoleoyl-GPC (18:0/18:2)*        | 0.146  | 0.078 | 0.065 | 0.204 | 0.152  | 0.082 | 0.065 | 0.207 | 0.080  | 0.175 | 0.648 | 0.980 |
| 1-stearoyl-2-linoleoyl-GPI (18:0/18:2)         | 0.128  | 0.080 | 0.112 | 0.293 | 0.153  | 0.083 | 0.068 | 0.210 | 0.162  | 0.178 | 0.365 | 0.888 |
| 1-stearoyl-2-oleoyl-GPC (18:0/18:1)            | 0.110  | 0.059 | 0.064 | 0.202 | 0.151  | 0.061 | 0.015 | 0.074 | 0.224  | 0.131 | 0.088 | 0.819 |
| 1-stearoyl-2-oleoyl-GPI (18:0/18:1)*           | 0.119  | 0.074 | 0.109 | 0.288 | 0.158  | 0.077 | 0.042 | 0.158 | 0.217  | 0.165 | 0.190 | 0.839 |
| 1-stearoyl-GPC (18:0)                          | -0.030 | 0.092 | 0.743 | 0.860 | 0.052  | 0.096 | 0.588 | 0.765 | 0.366  | 0.204 | 0.075 | 0.819 |
| 1-stearoyl-GPE (18:0)                          | 0.091  | 0.087 | 0.294 | 0.517 | 0.153  | 0.090 | 0.091 | 0.261 | 0.314  | 0.192 | 0.104 | 0.819 |
| 1-stearoyl-GPG (18:0)                          | -0.087 | 0.087 | 0.323 | 0.542 | -0.047 | 0.092 | 0.610 | 0.773 | 0.161  | 0.201 | 0.425 | 0.893 |
| 1-stearoyl-GPI (18:0)                          | -0.073 | 0.082 | 0.376 | 0.591 | -0.052 | 0.085 | 0.546 | 0.744 | 0.069  | 0.182 | 0.705 | 0.980 |
| 2,2'-Methylenebis(6-tert-butyl-p-cresol)       | -0.098 | 0.080 | 0.222 | 0.437 | -0.074 | 0.083 | 0.375 | 0.615 | 0.072  | 0.178 | 0.684 | 0.980 |
| 2,3-dihydroxy-2-methylbutyrate                 | 0.151  | 0.121 | 0.215 | 0.427 | 0.178  | 0.120 | 0.142 | 0.346 | 0.226  | 0.280 | 0.422 | 0.893 |
| 2,3-dihydroxyisovalerate                       | -0.012 | 0.088 | 0.895 | 0.945 | -0.032 | 0.091 | 0.727 | 0.858 | -0.097 | 0.196 | 0.619 | 0.972 |
| 21-hydroxypregnenolone disulfate               | -0.138 | 0.076 | 0.070 | 0.212 | -0.194 | 0.079 | 0.014 | 0.074 | -0.303 | 0.167 | 0.072 | 0.819 |
| 2-aminobutyrate                                | 0.152  | 0.072 | 0.036 | 0.136 | 0.139  | 0.075 | 0.066 | 0.208 | -0.004 | 0.160 | 0.982 | 0.997 |
| 2-aminooctanoate                               | 0.019  | 0.080 | 0.812 | 0.903 | -0.033 | 0.083 | 0.695 | 0.838 | -0.229 | 0.178 | 0.199 | 0.841 |
| 2-aminophenol sulfate                          | -0.016 | 0.075 | 0.833 | 0.918 | 0.025  | 0.081 | 0.757 | 0.880 | 0.175  | 0.169 | 0.302 | 0.873 |
| 2-butenoylglycine                              | 0.115  | 0.150 | 0.445 | 0.647 | 0.146  | 0.169 | 0.390 | 0.622 | 0.167  | 0.420 | 0.692 | 0.980 |

|                                        |        |       |       |       |        |       |       |       |        |       |       |       |
|----------------------------------------|--------|-------|-------|-------|--------|-------|-------|-------|--------|-------|-------|-------|
| 2'-deoxyuridine                        | -0.114 | 0.084 | 0.180 | 0.384 | -0.143 | 0.088 | 0.108 | 0.289 | -0.166 | 0.185 | 0.371 | 0.888 |
| 2-ethylphenylsulfate                   | 0.011  | 0.103 | 0.912 | 0.953 | -0.065 | 0.105 | 0.537 | 0.742 | -0.456 | 0.255 | 0.077 | 0.819 |
| 2-hydroxy-3-methylvalerate             | 0.084  | 0.076 | 0.267 | 0.486 | 0.099  | 0.079 | 0.209 | 0.434 | 0.099  | 0.169 | 0.558 | 0.947 |
| 2-hydroxybutyrate/2-hydroxyisobutyrate | 0.191  | 0.081 | 0.020 | 0.094 | 0.170  | 0.085 | 0.047 | 0.169 | -0.024 | 0.181 | 0.894 | 0.992 |
| 2-hydroxydecanoate                     | 0.056  | 0.075 | 0.458 | 0.658 | 0.008  | 0.078 | 0.920 | 0.959 | -0.198 | 0.167 | 0.236 | 0.845 |
| 2-hydroxyfluorene sulfate              | -0.108 | 0.064 | 0.092 | 0.258 | -0.106 | 0.066 | 0.112 | 0.295 | -0.030 | 0.142 | 0.831 | 0.988 |
| 2-hydroxyglutarate                     | 0.056  | 0.103 | 0.591 | 0.760 | -0.012 | 0.107 | 0.912 | 0.959 | -0.237 | 0.210 | 0.260 | 0.848 |
| 2-hydroxyheptanoate*                   | -0.123 | 0.089 | 0.169 | 0.371 | -0.124 | 0.093 | 0.185 | 0.405 | -0.047 | 0.199 | 0.815 | 0.988 |
| 2-hydroxyhippurate (salicylurate)      | 0.091  | 0.087 | 0.293 | 0.517 | 0.111  | 0.091 | 0.221 | 0.445 | 0.121  | 0.192 | 0.529 | 0.942 |
| 2-hydroxylaurate                       | 0.041  | 0.073 | 0.572 | 0.745 | -0.007 | 0.076 | 0.923 | 0.961 | -0.208 | 0.163 | 0.203 | 0.841 |
| 2-hydroxynervonate*                    | 0.069  | 0.043 | 0.105 | 0.281 | 0.061  | 0.044 | 0.172 | 0.387 | -0.014 | 0.095 | 0.887 | 0.992 |
| 2-hydroxyoctanoate                     | 0.119  | 0.080 | 0.142 | 0.337 | 0.073  | 0.084 | 0.390 | 0.622 | -0.168 | 0.179 | 0.351 | 0.885 |
| 2-hydroxypalmitate                     | 0.026  | 0.088 | 0.765 | 0.877 | 0.009  | 0.091 | 0.919 | 0.959 | -0.068 | 0.195 | 0.730 | 0.980 |
| 2-hydroxystearate                      | -0.132 | 0.092 | 0.152 | 0.348 | -0.133 | 0.096 | 0.168 | 0.382 | -0.050 | 0.205 | 0.809 | 0.988 |
| 2-isopropylmalate                      | 0.171  | 0.106 | 0.109 | 0.288 | 0.175  | 0.109 | 0.109 | 0.289 | 0.095  | 0.221 | 0.670 | 0.980 |
| 2-keto-3-deoxy-gluconate               | 0.176  | 0.082 | 0.033 | 0.131 | 0.170  | 0.085 | 0.048 | 0.170 | 0.038  | 0.182 | 0.833 | 0.988 |
| 2-methylcitrate/homocitrate            | 0.154  | 0.081 | 0.059 | 0.195 | 0.085  | 0.084 | 0.311 | 0.551 | -0.248 | 0.177 | 0.164 | 0.819 |
| 2-methylmalonylcarnitine (C4-DC)       | 0.186  | 0.098 | 0.060 | 0.196 | 0.151  | 0.102 | 0.141 | 0.344 | -0.088 | 0.218 | 0.686 | 0.980 |
| 2-naphthol sulfate                     | 0.021  | 0.070 | 0.768 | 0.877 | 0.020  | 0.073 | 0.783 | 0.898 | 0.005  | 0.157 | 0.975 | 0.995 |
| 2-oleoylglycerol (18:1)                | 0.166  | 0.076 | 0.030 | 0.122 | 0.184  | 0.079 | 0.021 | 0.096 | 0.139  | 0.167 | 0.408 | 0.893 |
| 2'-O-methylcytidine                    | -0.137 | 0.087 | 0.117 | 0.301 | -0.111 | 0.091 | 0.222 | 0.446 | 0.066  | 0.193 | 0.734 | 0.981 |
| 2'-O-methyluridine                     | -0.089 | 0.077 | 0.251 | 0.471 | -0.049 | 0.080 | 0.536 | 0.742 | 0.132  | 0.165 | 0.425 | 0.893 |
| 2-palmitoleoylglycerol (16:1)*         | 0.095  | 0.122 | 0.440 | 0.641 | 0.112  | 0.126 | 0.379 | 0.618 | 0.120  | 0.285 | 0.675 | 0.980 |
| 2-palmitoleoyl-GPC* (16:1)*            | 0.166  | 0.100 | 0.101 | 0.276 | 0.192  | 0.104 | 0.068 | 0.210 | 0.174  | 0.215 | 0.419 | 0.893 |
| 2-palmitoyl-GPC* (16:0)*               | -0.002 | 0.084 | 0.978 | 0.990 | 0.061  | 0.088 | 0.486 | 0.701 | 0.288  | 0.186 | 0.124 | 0.819 |
| 2-piperidinone                         | -0.096 | 0.084 | 0.251 | 0.471 | -0.059 | 0.088 | 0.504 | 0.716 | 0.138  | 0.187 | 0.461 | 0.902 |
| 2-stearoyl-GPE (18:0)*                 | 0.097  | 0.086 | 0.264 | 0.485 | 0.164  | 0.090 | 0.069 | 0.212 | 0.341  | 0.191 | 0.076 | 0.819 |
| 3-(3-amino-3-carboxypropyl)uridine*    | 0.219  | 0.096 | 0.024 | 0.105 | 0.248  | 0.099 | 0.014 | 0.070 | 0.221  | 0.217 | 0.310 | 0.873 |
| 3-(3-hydroxyphenyl)propionate          | -0.155 | 0.105 | 0.142 | 0.337 | -0.154 | 0.102 | 0.134 | 0.331 | -0.094 | 0.211 | 0.657 | 0.980 |
| 3-(4-hydroxyphenyl)lactate (HPLA)      | 0.151  | 0.070 | 0.033 | 0.131 | 0.147  | 0.073 | 0.046 | 0.168 | 0.037  | 0.156 | 0.815 | 0.988 |
| 3-(methylthio)acetaminophen sulfate*   | -0.217 | 0.502 | 0.687 | 0.818 | -0.057 | 0.507 | 0.916 | 0.959 | 1.260  | 1.522 | 0.469 | 0.902 |
| 3,4-methyleneheptanoate                | 0.056  | 0.080 | 0.490 | 0.683 | -0.011 | 0.084 | 0.897 | 0.952 | -0.279 | 0.177 | 0.118 | 0.819 |
| 3,4-methyleneheptanoylcarnitine        | 0.144  | 0.108 | 0.186 | 0.392 | 0.016  | 0.115 | 0.892 | 0.949 | -0.487 | 0.228 | 0.035 | 0.761 |

|                                                         |        |       |       |       |        |       |       |       |        |       |       |       |
|---------------------------------------------------------|--------|-------|-------|-------|--------|-------|-------|-------|--------|-------|-------|-------|
| 3-acetylphenol sulfate                                  | 0.130  | 0.116 | 0.265 | 0.485 | 0.083  | 0.121 | 0.498 | 0.711 | -0.209 | 0.278 | 0.455 | 0.902 |
| 3-amino-2-piperidone                                    | 0.100  | 0.092 | 0.278 | 0.501 | 0.111  | 0.095 | 0.248 | 0.477 | 0.087  | 0.206 | 0.674 | 0.980 |
| 3-aminoisobutyrate                                      | 0.119  | 0.088 | 0.178 | 0.384 | 0.182  | 0.091 | 0.047 | 0.170 | 0.331  | 0.195 | 0.091 | 0.819 |
| 3beta,7alpha-dihydroxy-5-cholestenoate                  | -0.012 | 0.071 | 0.869 | 0.930 | -0.088 | 0.074 | 0.236 | 0.466 | -0.352 | 0.157 | 0.026 | 0.738 |
| 3-carboxy-4-methyl-5-pentyl-2-furanpropionate (3-CMPFP) | 0.150  | 0.071 | 0.037 | 0.140 | 0.136  | 0.075 | 0.070 | 0.214 | -0.008 | 0.159 | 0.960 | 0.994 |
| 3-carboxy-4-methyl-5-propyl-2-furanpropanoate (CMPF)    | 0.095  | 0.053 | 0.077 | 0.227 | 0.091  | 0.056 | 0.102 | 0.281 | 0.019  | 0.119 | 0.877 | 0.992 |
| 3-ethylcatechol sulfate (1)                             | 0.059  | 0.111 | 0.599 | 0.766 | 0.039  | 0.121 | 0.747 | 0.871 | -0.116 | 0.300 | 0.700 | 0.980 |
| 3-ethylphenylsulfate                                    | 0.293  | 0.175 | 0.107 | 0.286 | 0.159  | 0.179 | 0.383 | 0.620 | -0.605 | 0.407 | 0.150 | 0.819 |
| 3-formylindole                                          | 0.059  | 0.085 | 0.491 | 0.684 | 0.047  | 0.089 | 0.594 | 0.765 | -0.031 | 0.190 | 0.872 | 0.992 |
| 3-hydroxy-3-methylglutarate                             | 0.124  | 0.094 | 0.187 | 0.393 | 0.086  | 0.097 | 0.374 | 0.615 | -0.126 | 0.209 | 0.547 | 0.947 |
| 3-hydroxybutyrate (BHBA)                                | 0.007  | 0.080 | 0.927 | 0.963 | 0.033  | 0.083 | 0.696 | 0.838 | 0.118  | 0.178 | 0.509 | 0.930 |
| 3-hydroxybutyrylglycine                                 | -0.071 | 0.090 | 0.432 | 0.635 | -0.086 | 0.095 | 0.364 | 0.602 | -0.089 | 0.195 | 0.650 | 0.980 |
| 3-hydroxybutyrylcarnitine (1)                           | 0.167  | 0.109 | 0.129 | 0.321 | 0.163  | 0.113 | 0.152 | 0.361 | 0.045  | 0.249 | 0.856 | 0.988 |
| 3-hydroxybutyrylcarnitine (2)                           | 0.116  | 0.078 | 0.139 | 0.335 | 0.121  | 0.081 | 0.139 | 0.342 | 0.065  | 0.174 | 0.711 | 0.980 |
| 3-hydroxydecanoate                                      | 0.017  | 0.084 | 0.843 | 0.920 | 0.032  | 0.088 | 0.720 | 0.852 | 0.074  | 0.188 | 0.695 | 0.980 |
| 3-hydroxydodecanedioate*                                | -0.060 | 0.126 | 0.635 | 0.788 | 0.006  | 0.133 | 0.962 | 0.976 | 0.257  | 0.271 | 0.346 | 0.885 |
| 3-hydroxyhexanoate                                      | 0.163  | 0.086 | 0.062 | 0.199 | 0.188  | 0.090 | 0.037 | 0.143 | 0.177  | 0.192 | 0.360 | 0.887 |
| 3-hydroxyhippurate                                      | -0.116 | 0.084 | 0.169 | 0.371 | -0.053 | 0.087 | 0.544 | 0.744 | 0.227  | 0.181 | 0.211 | 0.841 |
| 3-hydroxylaurate                                        | -0.070 | 0.083 | 0.401 | 0.611 | -0.056 | 0.087 | 0.518 | 0.730 | 0.037  | 0.185 | 0.840 | 0.988 |
| 3-hydroxyoctanoate                                      | 0.109  | 0.082 | 0.187 | 0.393 | 0.112  | 0.086 | 0.193 | 0.416 | 0.053  | 0.183 | 0.772 | 0.984 |
| 3-hydroxyoleoylcarnitine                                | 0.067  | 0.079 | 0.396 | 0.605 | 0.109  | 0.082 | 0.182 | 0.402 | 0.218  | 0.174 | 0.214 | 0.841 |
| 3-hydroxypalmitoylcarnitine                             | 0.273  | 0.108 | 0.013 | 0.066 | 0.341  | 0.107 | 0.002 | 0.014 | 0.430  | 0.222 | 0.056 | 0.819 |
| 3-hydroxypyridine sulfate                               | 0.072  | 0.072 | 0.321 | 0.542 | 0.031  | 0.075 | 0.681 | 0.830 | -0.169 | 0.164 | 0.304 | 0.873 |
| 3-hydroxysebacate                                       | 0.091  | 0.103 | 0.376 | 0.591 | 0.063  | 0.104 | 0.546 | 0.744 | -0.088 | 0.225 | 0.697 | 0.980 |
| 3-hydroxystachydrine*                                   | 0.151  | 0.113 | 0.187 | 0.393 | 0.115  | 0.116 | 0.324 | 0.566 | -0.122 | 0.266 | 0.649 | 0.980 |
| 3-indoxyl sulfate                                       | -0.041 | 0.086 | 0.635 | 0.788 | 0.012  | 0.090 | 0.891 | 0.949 | 0.228  | 0.191 | 0.234 | 0.844 |
| 3-methoxycatechol sulfate (1)                           | -0.088 | 0.091 | 0.334 | 0.554 | -0.117 | 0.093 | 0.213 | 0.437 | -0.171 | 0.203 | 0.402 | 0.893 |
| 3-methoxycatechol sulfate (2)                           | 0.296  | 0.126 | 0.021 | 0.094 | 0.304  | 0.134 | 0.025 | 0.110 | 0.125  | 0.274 | 0.649 | 0.980 |
| 3-methoxytyramine sulfate                               | 0.098  | 0.120 | 0.414 | 0.618 | 0.113  | 0.121 | 0.355 | 0.591 | 0.105  | 0.241 | 0.665 | 0.980 |
| 3-methoxytyrosine                                       | -0.050 | 0.082 | 0.543 | 0.721 | 0.042  | 0.086 | 0.626 | 0.782 | 0.395  | 0.180 | 0.029 | 0.738 |
| 3-methyl catechol sulfate (1)                           | 0.023  | 0.069 | 0.733 | 0.855 | -0.004 | 0.071 | 0.951 | 0.971 | -0.122 | 0.154 | 0.432 | 0.898 |
| 3-methyl-2-oxobutyrate                                  | 0.130  | 0.074 | 0.082 | 0.239 | 0.155  | 0.077 | 0.046 | 0.168 | 0.160  | 0.165 | 0.333 | 0.880 |
| 3-methyladipate                                         | 0.049  | 0.114 | 0.666 | 0.806 | -0.038 | 0.122 | 0.758 | 0.880 | -0.475 | 0.284 | 0.098 | 0.819 |

|                                               |        |       |       |       |        |       |       |       |        |       |       |       |
|-----------------------------------------------|--------|-------|-------|-------|--------|-------|-------|-------|--------|-------|-------|-------|
| 3-methylglutaconate                           | 0.081  | 0.091 | 0.375 | 0.591 | 0.061  | 0.095 | 0.520 | 0.731 | -0.062 | 0.203 | 0.763 | 0.982 |
| 3-methylglutaryl carnitine (2)                | 0.081  | 0.093 | 0.387 | 0.598 | 0.058  | 0.096 | 0.547 | 0.745 | -0.081 | 0.214 | 0.706 | 0.980 |
| 3-methylhistidine                             | 0.049  | 0.102 | 0.630 | 0.785 | -0.058 | 0.107 | 0.587 | 0.765 | -0.417 | 0.213 | 0.052 | 0.819 |
| 3-methylxanthine                              | 0.191  | 0.190 | 0.321 | 0.542 | 0.309  | 0.204 | 0.141 | 0.344 | 0.632  | 0.472 | 0.191 | 0.839 |
| 3-phenylpropionate (hydrocinnamate)           | -0.141 | 0.085 | 0.101 | 0.276 | -0.021 | 0.090 | 0.814 | 0.914 | 0.494  | 0.187 | 0.009 | 0.738 |
| 3-phosphoglycerate                            | 0.072  | 0.075 | 0.341 | 0.557 | 0.066  | 0.078 | 0.404 | 0.633 | -0.003 | 0.168 | 0.986 | 0.998 |
| 3-ureidopropionate                            | 0.246  | 0.108 | 0.025 | 0.109 | 0.217  | 0.114 | 0.060 | 0.200 | -0.064 | 0.252 | 0.801 | 0.988 |
| 4-acetamidobutanoate                          | 0.197  | 0.092 | 0.034 | 0.133 | 0.187  | 0.096 | 0.053 | 0.186 | 0.028  | 0.205 | 0.892 | 0.992 |
| 4-acetamidophenol                             | -0.145 | 0.200 | 0.543 | 0.721 | -0.110 | 0.235 | 0.686 | 0.832 | 2.010  | 0.004 | 0.001 | 0.614 |
| 4-acetamidophenylglucuronide                  | -0.408 | 0.252 | 0.180 | 0.384 | -0.335 | 0.361 | 0.406 | 0.635 | 0.803  | 0.773 | 0.376 | 0.888 |
| 4-acetaminophen sulfate                       | -0.313 | 0.305 | 0.326 | 0.544 | -0.196 | 0.395 | 0.629 | 0.784 | 0.693  | 0.831 | 0.422 | 0.893 |
| 4-acetylphenyl sulfate                        | 0.043  | 0.093 | 0.644 | 0.793 | 0.005  | 0.099 | 0.963 | 0.976 | -0.182 | 0.221 | 0.412 | 0.893 |
| 4-allylphenol sulfate                         | 0.083  | 0.071 | 0.245 | 0.464 | 0.098  | 0.074 | 0.191 | 0.412 | 0.096  | 0.160 | 0.550 | 0.947 |
| 4-ethylphenyl sulfate                         | 0.086  | 0.087 | 0.320 | 0.542 | 0.130  | 0.090 | 0.149 | 0.359 | 0.231  | 0.192 | 0.231 | 0.844 |
| 4-hydroxy-2-oxoglutaric acid                  | -0.021 | 0.074 | 0.778 | 0.881 | -0.067 | 0.078 | 0.390 | 0.622 | -0.221 | 0.167 | 0.189 | 0.839 |
| 4-hydroxychlorothalonil                       | 0.001  | 0.080 | 0.985 | 0.990 | -0.031 | 0.083 | 0.708 | 0.845 | -0.145 | 0.175 | 0.408 | 0.893 |
| 4-hydroxyhippurate                            | 0.041  | 0.082 | 0.619 | 0.778 | 0.016  | 0.086 | 0.852 | 0.936 | -0.099 | 0.183 | 0.590 | 0.961 |
| 4-hydroxyphenylacetate                        | 0.103  | 0.090 | 0.256 | 0.475 | 0.053  | 0.093 | 0.572 | 0.758 | -0.192 | 0.201 | 0.341 | 0.885 |
| 4-hydroxyphenylacetylglutamine                | 0.104  | 0.113 | 0.359 | 0.574 | 0.023  | 0.117 | 0.842 | 0.933 | -0.470 | 0.289 | 0.107 | 0.819 |
| 4-hydroxyphenylpyruvate                       | 0.120  | 0.082 | 0.146 | 0.342 | 0.070  | 0.086 | 0.415 | 0.643 | -0.183 | 0.183 | 0.318 | 0.875 |
| 4-methoxyphenol sulfate                       | 0.033  | 0.075 | 0.664 | 0.806 | 0.062  | 0.078 | 0.430 | 0.651 | 0.143  | 0.166 | 0.389 | 0.889 |
| 4-methyl-2-oxopentanoate                      | 0.195  | 0.083 | 0.020 | 0.094 | 0.189  | 0.087 | 0.031 | 0.125 | 0.046  | 0.186 | 0.804 | 0.988 |
| 4-methylcatechol sulfate                      | -0.067 | 0.078 | 0.393 | 0.603 | -0.013 | 0.081 | 0.877 | 0.944 | 0.223  | 0.173 | 0.200 | 0.841 |
| 4-methylguaiacol sulfate                      | 0.007  | 0.098 | 0.943 | 0.972 | 0.015  | 0.103 | 0.882 | 0.944 | 0.042  | 0.226 | 0.855 | 0.988 |
| 4-vinylguaiacol sulfate                       | 0.183  | 0.084 | 0.031 | 0.126 | 0.182  | 0.087 | 0.037 | 0.142 | 0.069  | 0.195 | 0.723 | 0.980 |
| 4-vinylphenol sulfate                         | 0.090  | 0.072 | 0.212 | 0.425 | 0.050  | 0.076 | 0.508 | 0.721 | -0.152 | 0.161 | 0.347 | 0.885 |
| 5-(galactosylhydroxy)-L-lysine                | 0.283  | 0.120 | 0.020 | 0.093 | 0.238  | 0.121 | 0.052 | 0.181 | -0.078 | 0.270 | 0.774 | 0.984 |
| 5,6-dihydrothymine                            | 0.003  | 0.076 | 0.966 | 0.987 | 0.037  | 0.080 | 0.641 | 0.794 | 0.156  | 0.170 | 0.361 | 0.887 |
| 5,6-dihydrouracil                             | -0.035 | 0.080 | 0.665 | 0.806 | -0.035 | 0.083 | 0.679 | 0.830 | -0.012 | 0.178 | 0.947 | 0.993 |
| 5,6-dihydrouridine                            | 0.042  | 0.085 | 0.622 | 0.779 | 0.042  | 0.089 | 0.641 | 0.794 | 0.013  | 0.190 | 0.948 | 0.993 |
| 5-acetylamino-6-amino-3-methyluracil          | 0.164  | 0.119 | 0.175 | 0.379 | 0.162  | 0.124 | 0.196 | 0.420 | 0.045  | 0.297 | 0.880 | 0.992 |
| 5-acetylamino-6-formylamino-3-methyluracil    | 0.157  | 0.121 | 0.201 | 0.411 | 0.188  | 0.132 | 0.161 | 0.377 | 0.194  | 0.342 | 0.574 | 0.947 |
| 5alpha-androstan-3alpha,17beta-diol disulfate | 0.066  | 0.138 | 0.636 | 0.788 | 0.005  | 0.122 | 0.968 | 0.980 | -0.193 | 0.251 | 0.444 | 0.902 |



|                                                     |        |       |       |       |        |       |       |       |        |       |       |       |
|-----------------------------------------------------|--------|-------|-------|-------|--------|-------|-------|-------|--------|-------|-------|-------|
| 5alpha-androstan-3alpha,17beta-diol monosulfate (1) | 0.106  | 0.071 | 0.138 | 0.334 | 0.070  | 0.074 | 0.348 | 0.587 | -0.127 | 0.159 | 0.425 | 0.893 |
| 5alpha-androstan-3alpha,17beta-diol monosulfate (2) | 0.036  | 0.213 | 0.867 | 0.930 | -0.046 | 0.194 | 0.812 | 0.914 | -0.330 | 0.409 | 0.423 | 0.893 |
| 5alpha-androstan-3beta,17alpha-diol disulfate       | -0.049 | 0.137 | 0.720 | 0.846 | -0.018 | 0.133 | 0.893 | 0.949 | 0.097  | 0.270 | 0.722 | 0.980 |
| 5alpha-androstan-3beta,17beta-diol disulfate        | 0.084  | 0.051 | 0.101 | 0.276 | 0.051  | 0.053 | 0.339 | 0.579 | -0.119 | 0.113 | 0.296 | 0.873 |
| 5alpha-androstan-3beta,17beta-diol monosulfate (2)  | 0.034  | 0.091 | 0.711 | 0.840 | 0.015  | 0.089 | 0.867 | 0.943 | -0.064 | 0.189 | 0.737 | 0.981 |
| 5alpha-pregnan-3beta,20alpha-diol disulfate         | -0.124 | 0.079 | 0.118 | 0.302 | -0.163 | 0.082 | 0.049 | 0.174 | -0.221 | 0.176 | 0.212 | 0.841 |
| 5alpha-pregnan-3beta,20alpha-diol monosulfate (2)   | -0.177 | 0.077 | 0.022 | 0.097 | -0.231 | 0.080 | 0.004 | 0.028 | -0.306 | 0.171 | 0.076 | 0.819 |
| 5alpha-pregnan-3beta,20beta-diol monosulfate (1)    | -0.114 | 0.080 | 0.153 | 0.350 | -0.177 | 0.082 | 0.032 | 0.130 | -0.325 | 0.174 | 0.063 | 0.819 |
| 5alpha-pregnan-diol disulfate                       | 0.092  | 0.115 | 0.425 | 0.630 | -0.024 | 0.119 | 0.838 | 0.930 | -0.387 | 0.225 | 0.088 | 0.819 |
| 5-dodecenoate (12:1n7)                              | -0.146 | 0.086 | 0.090 | 0.254 | -0.114 | 0.089 | 0.205 | 0.428 | 0.094  | 0.191 | 0.624 | 0.972 |
| 5-dodecenoylcarnitine (C12:1)                       | 0.053  | 0.083 | 0.520 | 0.708 | 0.062  | 0.086 | 0.470 | 0.686 | 0.060  | 0.184 | 0.745 | 0.982 |
| 5-HEPE                                              | -0.206 | 0.206 | 0.325 | 0.543 | 0.006  | 0.256 | 0.980 | 0.989 | 0.833  | 0.473 | 0.088 | 0.819 |
| 5-hydroxyhexanoate                                  | 0.103  | 0.089 | 0.251 | 0.471 | 0.130  | 0.092 | 0.161 | 0.376 | 0.164  | 0.197 | 0.407 | 0.893 |
| 5-methyluridine (ribothymidine)                     | 0.019  | 0.080 | 0.810 | 0.901 | 0.027  | 0.083 | 0.744 | 0.870 | 0.044  | 0.179 | 0.808 | 0.988 |
| 5-oxoproline                                        | 0.003  | 0.082 | 0.967 | 0.988 | 0.045  | 0.085 | 0.595 | 0.765 | 0.193  | 0.182 | 0.290 | 0.873 |
| 6-bromotryptophan                                   | -0.051 | 0.077 | 0.508 | 0.700 | -0.024 | 0.081 | 0.769 | 0.888 | 0.107  | 0.172 | 0.534 | 0.943 |
| 6-hydroxyindole sulfate                             | -0.027 | 0.087 | 0.758 | 0.873 | 0.031  | 0.089 | 0.727 | 0.858 | 0.251  | 0.190 | 0.187 | 0.839 |
| 7-HOCA                                              | 0.037  | 0.073 | 0.612 | 0.775 | 0.061  | 0.075 | 0.416 | 0.643 | 0.126  | 0.161 | 0.437 | 0.900 |
| 7-methylguanidine                                   | 0.008  | 0.077 | 0.920 | 0.957 | 0.060  | 0.080 | 0.456 | 0.676 | 0.240  | 0.170 | 0.161 | 0.819 |
| 8-hydroxyoctanoate                                  | -0.099 | 0.081 | 0.227 | 0.444 | -0.170 | 0.084 | 0.046 | 0.168 | -0.381 | 0.186 | 0.043 | 0.797 |
| 9,10-DiHOME                                         | -0.084 | 0.076 | 0.271 | 0.491 | -0.061 | 0.080 | 0.444 | 0.663 | 0.074  | 0.170 | 0.665 | 0.980 |
| 9-hydroxystearate                                   | -0.121 | 0.075 | 0.107 | 0.286 | -0.128 | 0.078 | 0.102 | 0.281 | -0.076 | 0.167 | 0.648 | 0.980 |
| acesulfame                                          | -0.505 | 0.339 | 0.160 | 0.357 | -0.528 | 0.366 | 0.173 | 0.388 | -0.234 | 0.733 | 0.755 | 0.982 |
| acetylcarnitine (C2)                                | 0.049  | 0.083 | 0.557 | 0.734 | 0.067  | 0.086 | 0.437 | 0.660 | 0.102  | 0.185 | 0.583 | 0.957 |
| acisoga                                             | -0.002 | 0.083 | 0.982 | 0.990 | 0.048  | 0.086 | 0.581 | 0.762 | 0.225  | 0.184 | 0.222 | 0.844 |
| aconitate [cis or trans]                            | 0.161  | 0.079 | 0.044 | 0.156 | 0.237  | 0.082 | 0.004 | 0.027 | 0.409  | 0.174 | 0.020 | 0.738 |
| adenine                                             | 0.014  | 0.088 | 0.875 | 0.932 | 0.028  | 0.092 | 0.761 | 0.882 | 0.067  | 0.194 | 0.729 | 0.980 |
| adipoylcarnitine (C6-DC)                            | 0.190  | 0.080 | 0.019 | 0.090 | 0.174  | 0.084 | 0.039 | 0.147 | -0.003 | 0.179 | 0.987 | 0.998 |
| adrenate (22:4n6)                                   | -0.020 | 0.090 | 0.820 | 0.909 | -0.027 | 0.093 | 0.774 | 0.891 | -0.037 | 0.200 | 0.854 | 0.988 |
| adrenoylcarnitine (C22:4)*                          | -0.053 | 0.076 | 0.490 | 0.683 | 0.043  | 0.080 | 0.592 | 0.765 | 0.424  | 0.169 | 0.013 | 0.738 |
| allantoin                                           | 0.054  | 0.081 | 0.512 | 0.701 | 0.058  | 0.085 | 0.498 | 0.711 | 0.038  | 0.182 | 0.834 | 0.988 |
| alliin                                              | 0.147  | 0.089 | 0.101 | 0.276 | 0.151  | 0.091 | 0.100 | 0.279 | 0.082  | 0.195 | 0.675 | 0.980 |
| alpha-hydroxycaproate                               | -0.009 | 0.087 | 0.914 | 0.953 | 0.011  | 0.090 | 0.900 | 0.954 | 0.090  | 0.192 | 0.641 | 0.980 |

|                                                  |        |       |       |       |        |       |       |       |        |       |       |       |
|--------------------------------------------------|--------|-------|-------|-------|--------|-------|-------|-------|--------|-------|-------|-------|
| alpha-hydroxyisocaproate                         | 0.038  | 0.077 | 0.619 | 0.778 | 0.013  | 0.080 | 0.872 | 0.944 | -0.102 | 0.172 | 0.553 | 0.947 |
| alpha-hydroxyisovalerate                         | -0.035 | 0.071 | 0.624 | 0.780 | -0.045 | 0.074 | 0.543 | 0.744 | -0.060 | 0.159 | 0.709 | 0.980 |
| alpha-ketobutyrate                               | 0.196  | 0.092 | 0.036 | 0.136 | 0.152  | 0.093 | 0.106 | 0.286 | -0.125 | 0.210 | 0.553 | 0.947 |
| alpha-ketoglutarate*                             | 0.067  | 0.085 | 0.429 | 0.632 | 0.013  | 0.088 | 0.882 | 0.944 | -0.222 | 0.188 | 0.239 | 0.847 |
| alpha-ketoglutarate                              | -0.025 | 0.082 | 0.761 | 0.874 | -0.005 | 0.085 | 0.949 | 0.971 | 0.080  | 0.182 | 0.662 | 0.980 |
| alpha-tocopherol                                 | 0.033  | 0.090 | 0.713 | 0.842 | 0.034  | 0.094 | 0.720 | 0.852 | 0.015  | 0.200 | 0.942 | 0.993 |
| AMP                                              | 0.046  | 0.073 | 0.532 | 0.713 | 0.042  | 0.076 | 0.578 | 0.761 | 0.001  | 0.162 | 0.995 | 0.999 |
| andro steroid monosulfate C19H28O6S (1)*         | 0.092  | 0.084 | 0.275 | 0.497 | 0.035  | 0.089 | 0.695 | 0.838 | -0.221 | 0.185 | 0.235 | 0.844 |
| androstenediol (3alpha, 17alpha) monosulfate (2) | 0.031  | 0.074 | 0.679 | 0.812 | 0.047  | 0.078 | 0.544 | 0.744 | 0.084  | 0.163 | 0.610 | 0.967 |
| androstenediol (3alpha, 17alpha) monosulfate (3) | -0.083 | 0.053 | 0.119 | 0.303 | -0.105 | 0.055 | 0.057 | 0.193 | -0.133 | 0.118 | 0.261 | 0.848 |
| androstenediol (3beta,17beta) disulfate (1)      | 0.131  | 0.057 | 0.021 | 0.096 | 0.097  | 0.059 | 0.105 | 0.285 | -0.110 | 0.126 | 0.384 | 0.889 |
| androstenediol (3beta,17beta) disulfate (2)      | -0.057 | 0.061 | 0.347 | 0.563 | -0.088 | 0.063 | 0.165 | 0.381 | -0.161 | 0.135 | 0.234 | 0.844 |
| androstenediol (3beta,17beta) monosulfate (1)    | 0.082  | 0.062 | 0.186 | 0.392 | 0.029  | 0.065 | 0.652 | 0.804 | -0.212 | 0.137 | 0.124 | 0.819 |
| androstenediol (3beta,17beta) monosulfate (2)    | -0.010 | 0.071 | 0.885 | 0.938 | -0.056 | 0.074 | 0.452 | 0.672 | -0.212 | 0.158 | 0.182 | 0.839 |
| androsterone glucuronide                         | 0.096  | 0.074 | 0.197 | 0.406 | 0.030  | 0.077 | 0.694 | 0.838 | -0.242 | 0.158 | 0.127 | 0.819 |
| androsterone sulfate                             | -0.150 | 0.065 | 0.022 | 0.097 | -0.194 | 0.067 | 0.004 | 0.029 | -0.253 | 0.144 | 0.080 | 0.819 |
| arabitol/xylitol                                 | 0.193  | 0.090 | 0.032 | 0.130 | 0.125  | 0.094 | 0.186 | 0.405 | -0.241 | 0.199 | 0.227 | 0.844 |
| arabonate/xylonate                               | 0.199  | 0.086 | 0.021 | 0.096 | 0.149  | 0.090 | 0.099 | 0.278 | -0.155 | 0.191 | 0.416 | 0.893 |
| arachidate (20:0)                                | 0.073  | 0.075 | 0.332 | 0.552 | 0.063  | 0.078 | 0.418 | 0.643 | -0.017 | 0.167 | 0.920 | 0.992 |
| arachidonate (20:4n6)                            | -0.003 | 0.088 | 0.971 | 0.988 | -0.009 | 0.091 | 0.924 | 0.961 | -0.027 | 0.196 | 0.891 | 0.992 |
| arachidonoylcarnitine (C20:4)                    | -0.085 | 0.077 | 0.267 | 0.486 | -0.017 | 0.080 | 0.830 | 0.924 | 0.280  | 0.170 | 0.101 | 0.819 |
| arachidonoylcholine                              | -0.088 | 0.081 | 0.277 | 0.500 | -0.121 | 0.084 | 0.150 | 0.359 | -0.184 | 0.180 | 0.308 | 0.873 |
| arachidoylcarnitine (C20)*                       | -0.066 | 0.080 | 0.413 | 0.618 | -0.019 | 0.084 | 0.820 | 0.919 | 0.196  | 0.181 | 0.282 | 0.869 |
| arginine                                         | 0.072  | 0.085 | 0.396 | 0.605 | 0.072  | 0.088 | 0.417 | 0.643 | 0.025  | 0.189 | 0.897 | 0.992 |
| asparagine                                       | -0.086 | 0.095 | 0.370 | 0.587 | -0.110 | 0.099 | 0.268 | 0.502 | -0.144 | 0.212 | 0.499 | 0.918 |
| azelate (nonanedioate; C9)                       | 0.066  | 0.077 | 0.388 | 0.598 | 0.025  | 0.080 | 0.755 | 0.879 | -0.164 | 0.170 | 0.336 | 0.883 |
| behenoyl sphingomyelin (d18:1/22:0)*             | 0.122  | 0.055 | 0.029 | 0.121 | 0.125  | 0.058 | 0.032 | 0.128 | 0.058  | 0.123 | 0.636 | 0.976 |
| behenoylcarnitine (C22)*                         | 0.125  | 0.085 | 0.142 | 0.337 | 0.135  | 0.087 | 0.124 | 0.315 | 0.096  | 0.185 | 0.604 | 0.963 |
| benzoate                                         | -0.147 | 0.082 | 0.074 | 0.220 | -0.163 | 0.085 | 0.057 | 0.193 | -0.128 | 0.183 | 0.485 | 0.905 |
| beta-cryptoxanthin                               | -0.023 | 0.079 | 0.774 | 0.881 | -0.087 | 0.082 | 0.289 | 0.525 | -0.303 | 0.175 | 0.085 | 0.819 |
| beta-sitosterol                                  | -0.190 | 0.077 | 0.015 | 0.074 | -0.204 | 0.080 | 0.012 | 0.063 | -0.132 | 0.170 | 0.438 | 0.900 |
| bradykinin                                       | 3.141  | 1.852 | 0.339 | 0.557 | 1.020  | 0.578 | 0.328 | 0.569 | 34.000 | NA    | NA    | NA    |
| bradykinin, des-arg(9)                           | 0.302  | 0.354 | 0.413 | 0.618 | 0.491  | 0.329 | 0.166 | 0.381 | 0.647  | 0.544 | 0.264 | 0.848 |

|                                    |        |       |       |       |        |       |       |       |        |       |       |       |
|------------------------------------|--------|-------|-------|-------|--------|-------|-------|-------|--------|-------|-------|-------|
| caffeic acid sulfate               | -0.128 | 0.087 | 0.142 | 0.337 | -0.142 | 0.092 | 0.126 | 0.321 | -0.098 | 0.198 | 0.623 | 0.972 |
| caffeine                           | 0.220  | 0.120 | 0.070 | 0.212 | 0.161  | 0.125 | 0.203 | 0.427 | -0.265 | 0.298 | 0.377 | 0.888 |
| campesterol                        | -0.171 | 0.085 | 0.045 | 0.158 | -0.159 | 0.090 | 0.079 | 0.235 | 0.003  | 0.191 | 0.987 | 0.998 |
| caprate (10:0)                     | 0.028  | 0.081 | 0.729 | 0.854 | 0.006  | 0.084 | 0.944 | 0.969 | -0.090 | 0.180 | 0.616 | 0.972 |
| caproate (6:0)                     | -0.104 | 0.074 | 0.160 | 0.357 | -0.151 | 0.076 | 0.049 | 0.174 | -0.253 | 0.163 | 0.122 | 0.819 |
| caprylate (8:0)                    | 0.025  | 0.083 | 0.759 | 0.873 | -0.019 | 0.086 | 0.828 | 0.923 | -0.192 | 0.184 | 0.298 | 0.873 |
| carboxyethyl-GABA                  | 0.106  | 0.089 | 0.237 | 0.454 | 0.079  | 0.094 | 0.398 | 0.629 | -0.071 | 0.191 | 0.709 | 0.980 |
| carnitine                          | 0.150  | 0.083 | 0.074 | 0.219 | 0.162  | 0.087 | 0.063 | 0.204 | 0.112  | 0.186 | 0.546 | 0.947 |
| carotene diol (1)                  | -0.102 | 0.077 | 0.189 | 0.395 | -0.095 | 0.080 | 0.240 | 0.471 | -0.005 | 0.172 | 0.978 | 0.996 |
| carotene diol (3)                  | -0.123 | 0.103 | 0.236 | 0.452 | -0.094 | 0.108 | 0.388 | 0.622 | 0.084  | 0.226 | 0.712 | 0.980 |
| catechol sulfate                   | 0.027  | 0.074 | 0.715 | 0.842 | 0.143  | 0.076 | 0.061 | 0.201 | 0.540  | 0.159 | 0.001 | 0.614 |
| ceramide (d18:2/24:1, d18:1/24:2)* | 0.075  | 0.062 | 0.230 | 0.447 | 0.067  | 0.065 | 0.304 | 0.544 | -0.010 | 0.139 | 0.943 | 0.993 |
| cerotylcarnitine (C26)*            | 0.107  | 0.062 | 0.086 | 0.245 | 0.166  | 0.064 | 0.010 | 0.054 | 0.312  | 0.136 | 0.023 | 0.738 |
| C-glycosyltryptophan               | 0.132  | 0.091 | 0.147 | 0.343 | 0.169  | 0.094 | 0.074 | 0.224 | 0.218  | 0.201 | 0.281 | 0.869 |
| chenodeoxycholate                  | -0.017 | 0.082 | 0.836 | 0.920 | -0.044 | 0.085 | 0.603 | 0.769 | -0.131 | 0.182 | 0.473 | 0.902 |
| cholate                            | -0.010 | 0.083 | 0.906 | 0.952 | -0.023 | 0.087 | 0.792 | 0.903 | -0.063 | 0.186 | 0.734 | 0.981 |
| cholesterol                        | 0.182  | 0.086 | 0.036 | 0.136 | 0.191  | 0.090 | 0.035 | 0.138 | 0.104  | 0.192 | 0.588 | 0.959 |
| choline                            | 0.143  | 0.078 | 0.070 | 0.212 | 0.183  | 0.081 | 0.025 | 0.108 | 0.238  | 0.173 | 0.171 | 0.831 |
| cinnamoylglycine                   | -0.168 | 0.092 | 0.071 | 0.212 | -0.070 | 0.096 | 0.470 | 0.686 | 0.363  | 0.198 | 0.069 | 0.819 |
| cis-4-decenoate (10:1n6)*          | 0.052  | 0.079 | 0.506 | 0.699 | 0.054  | 0.082 | 0.510 | 0.723 | 0.027  | 0.175 | 0.879 | 0.992 |
| cis-4-decenoylcarnitine (C10:1)    | 0.043  | 0.079 | 0.586 | 0.755 | 0.047  | 0.082 | 0.570 | 0.758 | 0.033  | 0.176 | 0.854 | 0.988 |
| citramalate                        | 0.214  | 0.121 | 0.082 | 0.239 | 0.318  | 0.134 | 0.021 | 0.094 | 0.499  | 0.295 | 0.095 | 0.819 |
| citrate                            | -0.143 | 0.082 | 0.083 | 0.239 | -0.081 | 0.086 | 0.350 | 0.587 | 0.233  | 0.182 | 0.202 | 0.841 |
| citrulline                         | -0.087 | 0.087 | 0.321 | 0.542 | -0.085 | 0.091 | 0.351 | 0.588 | -0.023 | 0.195 | 0.906 | 0.992 |
| corticosterone                     | -0.081 | 0.079 | 0.306 | 0.528 | -0.140 | 0.081 | 0.086 | 0.250 | -0.307 | 0.175 | 0.082 | 0.819 |
| cotinine                           | -0.050 | 0.070 | 0.475 | 0.673 | -0.095 | 0.073 | 0.194 | 0.417 | -0.240 | 0.162 | 0.142 | 0.819 |
| creatine                           | 0.114  | 0.078 | 0.144 | 0.340 | 0.102  | 0.081 | 0.210 | 0.434 | -0.013 | 0.173 | 0.938 | 0.993 |
| creatinine                         | 0.180  | 0.082 | 0.029 | 0.121 | 0.194  | 0.085 | 0.024 | 0.105 | 0.130  | 0.182 | 0.476 | 0.902 |
| cys-gly, oxidized                  | 0.005  | 0.081 | 0.954 | 0.978 | 0.049  | 0.084 | 0.558 | 0.754 | 0.206  | 0.180 | 0.254 | 0.848 |
| cysteine                           | -0.008 | 0.090 | 0.932 | 0.967 | -0.050 | 0.094 | 0.591 | 0.765 | -0.197 | 0.200 | 0.326 | 0.877 |
| cysteine s-sulfate                 | 0.057  | 0.082 | 0.488 | 0.683 | 0.120  | 0.086 | 0.162 | 0.377 | 0.307  | 0.182 | 0.094 | 0.819 |
| cysteine sulfinic acid             | 0.059  | 0.082 | 0.475 | 0.673 | 0.096  | 0.087 | 0.268 | 0.502 | 0.191  | 0.187 | 0.308 | 0.873 |
| cysteinylglycine                   | -0.052 | 0.082 | 0.529 | 0.713 | -0.007 | 0.085 | 0.930 | 0.962 | 0.183  | 0.182 | 0.316 | 0.875 |

|                                            |        |       |       |       |        |       |       |       |        |       |       |       |
|--------------------------------------------|--------|-------|-------|-------|--------|-------|-------|-------|--------|-------|-------|-------|
| cysteinylglycine disulfide*                | 0.099  | 0.078 | 0.205 | 0.417 | 0.144  | 0.081 | 0.077 | 0.233 | 0.239  | 0.173 | 0.168 | 0.826 |
| cystine                                    | 0.056  | 0.087 | 0.522 | 0.709 | 0.124  | 0.089 | 0.165 | 0.381 | 0.304  | 0.180 | 0.093 | 0.819 |
| cytidine                                   | -0.094 | 0.089 | 0.292 | 0.516 | -0.110 | 0.093 | 0.239 | 0.470 | -0.105 | 0.201 | 0.602 | 0.963 |
| daidzein sulfate (2)                       | 0.115  | 0.112 | 0.308 | 0.530 | -0.007 | 0.116 | 0.952 | 0.971 | -0.537 | 0.249 | 0.033 | 0.738 |
| decanoylcarnitine (C10)                    | -0.040 | 0.086 | 0.643 | 0.792 | -0.022 | 0.090 | 0.805 | 0.910 | 0.067  | 0.192 | 0.728 | 0.980 |
| dehydroisoandrosterone sulfate (DHEA-S)    | -0.069 | 0.058 | 0.234 | 0.450 | -0.137 | 0.060 | 0.023 | 0.101 | -0.336 | 0.127 | 0.009 | 0.738 |
| delta-CEHC glucuronide*                    | 0.133  | 0.163 | 0.418 | 0.623 | 0.025  | 0.162 | 0.879 | 0.944 | -0.357 | 0.322 | 0.272 | 0.857 |
| delta-CEHC*                                | 0.051  | 0.068 | 0.453 | 0.655 | 0.042  | 0.072 | 0.560 | 0.755 | -0.030 | 0.159 | 0.849 | 0.988 |
| delta-tocopherol                           | -0.070 | 0.112 | 0.532 | 0.713 | -0.025 | 0.115 | 0.826 | 0.922 | 0.195  | 0.257 | 0.451 | 0.902 |
| deoxycarnitine                             | -0.035 | 0.066 | 0.594 | 0.762 | 0.005  | 0.068 | 0.945 | 0.969 | 0.169  | 0.146 | 0.249 | 0.848 |
| deoxycholate                               | 0.041  | 0.081 | 0.616 | 0.776 | 0.083  | 0.085 | 0.334 | 0.574 | 0.206  | 0.183 | 0.263 | 0.848 |
| diacylglycerol (14:0/18:1, 16:0/16:1) [1]* | 0.238  | 0.107 | 0.028 | 0.118 | 0.289  | 0.113 | 0.012 | 0.061 | 0.286  | 0.229 | 0.214 | 0.841 |
| dihomolinoleate (20:2n6)                   | -0.089 | 0.085 | 0.298 | 0.521 | -0.086 | 0.089 | 0.332 | 0.573 | -0.021 | 0.190 | 0.911 | 0.992 |
| dihomolinolenate (20:3n3 or 3n6)           | 0.031  | 0.087 | 0.726 | 0.852 | 0.055  | 0.091 | 0.546 | 0.744 | 0.122  | 0.194 | 0.530 | 0.942 |
| dihomo-linolenoylcarnitine (C20:3n3 or 6)* | -0.036 | 0.077 | 0.645 | 0.793 | 0.065  | 0.080 | 0.416 | 0.643 | 0.448  | 0.169 | 0.009 | 0.738 |
| dihomo-linolenoyl-choline                  | 0.020  | 0.086 | 0.817 | 0.907 | 0.021  | 0.089 | 0.812 | 0.914 | 0.014  | 0.184 | 0.941 | 0.993 |
| dihomo-linoleoylcarnitine (C20:2)*         | -0.058 | 0.073 | 0.432 | 0.635 | 0.025  | 0.076 | 0.742 | 0.870 | 0.357  | 0.161 | 0.028 | 0.738 |
| dihydrocaffeate sulfate (2)                | -0.067 | 0.089 | 0.453 | 0.655 | -0.018 | 0.092 | 0.848 | 0.935 | 0.207  | 0.200 | 0.302 | 0.873 |
| dihydroferulate                            | 0.076  | 0.111 | 0.496 | 0.689 | 0.089  | 0.107 | 0.408 | 0.635 | 0.127  | 0.255 | 0.620 | 0.972 |
| dihydroferulic acid sulfate                | 0.053  | 0.114 | 0.646 | 0.793 | 0.074  | 0.118 | 0.535 | 0.742 | 0.140  | 0.287 | 0.627 | 0.973 |
| dihydroorotate                             | 0.106  | 0.088 | 0.229 | 0.447 | 0.094  | 0.091 | 0.304 | 0.544 | -0.014 | 0.195 | 0.943 | 0.993 |
| dimethylarginine (ADMA + SDMA)             | 0.169  | 0.092 | 0.067 | 0.209 | 0.169  | 0.095 | 0.079 | 0.235 | 0.060  | 0.204 | 0.770 | 0.983 |
| docosadienoate (22:2n6)                    | 0.080  | 0.065 | 0.221 | 0.437 | 0.059  | 0.068 | 0.383 | 0.620 | -0.065 | 0.145 | 0.655 | 0.980 |
| docosadioate (C22-DC)                      | 0.055  | 0.067 | 0.414 | 0.618 | 0.004  | 0.070 | 0.956 | 0.973 | -0.214 | 0.149 | 0.154 | 0.819 |
| docosahexaenoate (DHA; 22:6n3)             | -0.062 | 0.072 | 0.385 | 0.598 | -0.066 | 0.075 | 0.379 | 0.618 | -0.038 | 0.160 | 0.810 | 0.988 |
| docosahexaenoylcarnitine (C22:6)*          | -0.078 | 0.082 | 0.343 | 0.559 | -0.073 | 0.086 | 0.397 | 0.628 | 0.000  | 0.191 | 0.999 | 0.999 |
| docosahexaenoylcholine                     | -0.067 | 0.083 | 0.426 | 0.630 | -0.096 | 0.087 | 0.273 | 0.505 | -0.155 | 0.185 | 0.403 | 0.893 |
| docosapentaenoate (DPA; 22:5n3)            | -0.022 | 0.075 | 0.767 | 0.877 | -0.029 | 0.078 | 0.714 | 0.848 | -0.037 | 0.167 | 0.824 | 0.988 |
| docosapentaenoate (n6 DPA; 22:5n6)         | -0.076 | 0.079 | 0.335 | 0.554 | -0.077 | 0.082 | 0.350 | 0.587 | -0.031 | 0.176 | 0.862 | 0.991 |
| docosapentaenoylcarnitine (C22:5n3)*       | -0.044 | 0.078 | 0.572 | 0.745 | 0.021  | 0.082 | 0.797 | 0.903 | 0.313  | 0.181 | 0.087 | 0.819 |
| docosatrienoate (22:3n3)                   | 0.002  | 0.079 | 0.979 | 0.990 | -0.002 | 0.082 | 0.981 | 0.989 | -0.018 | 0.178 | 0.919 | 0.992 |
| docosatrienoate (22:3n6)*                  | 0.110  | 0.116 | 0.344 | 0.559 | 0.123  | 0.121 | 0.312 | 0.552 | 0.100  | 0.274 | 0.717 | 0.980 |
| dodecadienoate (12:2)*                     | -0.054 | 0.082 | 0.512 | 0.701 | -0.045 | 0.086 | 0.602 | 0.769 | 0.023  | 0.183 | 0.902 | 0.992 |

|                                 |        |       |       |       |        |       |       |       |        |       |       |       |
|---------------------------------|--------|-------|-------|-------|--------|-------|-------|-------|--------|-------|-------|-------|
| dodecanedioate (C12)            | 0.024  | 0.084 | 0.777 | 0.881 | -0.009 | 0.087 | 0.921 | 0.960 | -0.139 | 0.186 | 0.456 | 0.902 |
| dodecenedioate (C12:1-DC)*      | -0.071 | 0.085 | 0.403 | 0.612 | -0.101 | 0.089 | 0.254 | 0.483 | -0.163 | 0.190 | 0.391 | 0.891 |
| dopamine 3-O-sulfate            | 0.107  | 0.075 | 0.157 | 0.353 | 0.089  | 0.079 | 0.260 | 0.490 | -0.045 | 0.169 | 0.789 | 0.988 |
| DSGEGDFXAEGGGVR*                | 0.523  | 0.288 | 0.119 | 0.303 | 0.603  | 0.448 | 0.227 | 0.455 | -1.550 | 1.499 | 0.348 | 0.885 |
| ectoine                         | 0.163  | 0.081 | 0.047 | 0.163 | 0.188  | 0.085 | 0.028 | 0.118 | 0.172  | 0.185 | 0.354 | 0.885 |
| EDTA                            | 0.030  | 0.066 | 0.651 | 0.797 | 0.013  | 0.069 | 0.852 | 0.936 | -0.068 | 0.148 | 0.649 | 0.980 |
| eicosanedioate (C20-DC)         | 0.000  | 0.076 | 0.999 | 0.999 | -0.031 | 0.079 | 0.695 | 0.838 | -0.141 | 0.168 | 0.402 | 0.893 |
| eicosapentaenoate (EPA; 20:5n3) | 0.079  | 0.074 | 0.287 | 0.510 | 0.057  | 0.077 | 0.462 | 0.681 | -0.072 | 0.165 | 0.663 | 0.980 |
| eicosenamide (20:1)*            | 0.039  | 0.080 | 0.624 | 0.780 | 0.009  | 0.084 | 0.919 | 0.959 | -0.126 | 0.178 | 0.480 | 0.902 |
| eicosenedioate (C20:1-DC)*      | -0.004 | 0.063 | 0.953 | 0.977 | -0.042 | 0.066 | 0.528 | 0.735 | -0.165 | 0.137 | 0.229 | 0.844 |
| eicosenoate (20:1n9 or 1n11)    | -0.027 | 0.061 | 0.658 | 0.803 | -0.031 | 0.064 | 0.633 | 0.788 | -0.025 | 0.137 | 0.855 | 0.988 |
| eicosenoylcarnitine (C20:1)*    | -0.051 | 0.050 | 0.302 | 0.525 | -0.030 | 0.052 | 0.564 | 0.755 | 0.079  | 0.110 | 0.475 | 0.902 |
| epiandrosterone sulfate         | -0.106 | 0.067 | 0.114 | 0.296 | -0.154 | 0.069 | 0.028 | 0.117 | -0.257 | 0.148 | 0.086 | 0.819 |
| equol sulfate                   | 0.412  | 0.187 | 0.033 | 0.131 | 0.313  | 0.213 | 0.149 | 0.358 | -0.359 | 0.427 | 0.406 | 0.893 |
| erucate (22:1n9)                | -0.006 | 0.042 | 0.888 | 0.940 | -0.023 | 0.044 | 0.605 | 0.770 | -0.078 | 0.093 | 0.402 | 0.893 |
| erucoylcarnitine (C22:1)*       | 0.043  | 0.074 | 0.566 | 0.742 | 0.008  | 0.079 | 0.917 | 0.959 | -0.192 | 0.190 | 0.315 | 0.875 |
| erythronate*                    | 0.196  | 0.088 | 0.028 | 0.118 | 0.194  | 0.092 | 0.037 | 0.143 | 0.059  | 0.197 | 0.765 | 0.982 |
| ethylmalonate                   | 0.056  | 0.088 | 0.530 | 0.713 | 0.057  | 0.092 | 0.537 | 0.742 | 0.026  | 0.198 | 0.895 | 0.992 |
| etiocholanolone glucuronide     | 0.071  | 0.087 | 0.412 | 0.618 | -0.002 | 0.089 | 0.982 | 0.989 | -0.286 | 0.183 | 0.121 | 0.819 |
| eugenol sulfate                 | -0.059 | 0.092 | 0.523 | 0.710 | -0.134 | 0.100 | 0.180 | 0.400 | -0.418 | 0.232 | 0.074 | 0.819 |
| FAD                             | 0.121  | 0.105 | 0.253 | 0.472 | 0.138  | 0.111 | 0.218 | 0.443 | 0.112  | 0.235 | 0.637 | 0.977 |
| ferulic acid 4-sulfate          | 0.140  | 0.092 | 0.130 | 0.322 | 0.115  | 0.094 | 0.220 | 0.445 | -0.048 | 0.201 | 0.811 | 0.988 |
| fructose                        | 0.202  | 0.077 | 0.010 | 0.054 | 0.170  | 0.081 | 0.037 | 0.142 | -0.071 | 0.172 | 0.680 | 0.980 |
| fumarate                        | -0.141 | 0.088 | 0.110 | 0.289 | -0.128 | 0.092 | 0.167 | 0.381 | 0.015  | 0.200 | 0.941 | 0.993 |
| galactonate                     | 0.017  | 0.092 | 0.851 | 0.924 | 0.021  | 0.095 | 0.828 | 0.923 | 0.023  | 0.203 | 0.911 | 0.992 |
| gamma-carboxyglutamate          | 0.160  | 0.088 | 0.071 | 0.212 | 0.204  | 0.091 | 0.026 | 0.113 | 0.261  | 0.195 | 0.182 | 0.839 |
| gamma-CEHC                      | 0.042  | 0.068 | 0.539 | 0.718 | -0.021 | 0.070 | 0.768 | 0.887 | -0.269 | 0.149 | 0.073 | 0.819 |
| gamma-CEHC glucuronide*         | 0.159  | 0.098 | 0.108 | 0.287 | 0.135  | 0.101 | 0.183 | 0.402 | -0.058 | 0.230 | 0.801 | 0.988 |
| gamma-glutamyl-2-aminobutyrate  | 0.075  | 0.094 | 0.426 | 0.630 | 0.015  | 0.097 | 0.875 | 0.944 | -0.252 | 0.210 | 0.233 | 0.844 |
| gamma-glutamylalanine           | 0.078  | 0.086 | 0.365 | 0.582 | 0.024  | 0.089 | 0.788 | 0.900 | -0.210 | 0.188 | 0.264 | 0.848 |
| gamma-glutamylcitrulline*       | -0.112 | 0.078 | 0.155 | 0.352 | -0.077 | 0.082 | 0.345 | 0.585 | 0.116  | 0.174 | 0.505 | 0.926 |
| gamma-glutamyl-epsilon-lysine   | 0.181  | 0.074 | 0.015 | 0.076 | 0.205  | 0.077 | 0.009 | 0.049 | 0.172  | 0.165 | 0.299 | 0.873 |
| gamma-glutamylglutamine         | -0.197 | 0.084 | 0.020 | 0.092 | -0.155 | 0.088 | 0.079 | 0.235 | 0.121  | 0.186 | 0.518 | 0.941 |

|                                             |        |       |       |       |        |       |       |       |        |       |       |       |
|---------------------------------------------|--------|-------|-------|-------|--------|-------|-------|-------|--------|-------|-------|-------|
| gamma-glutamylhistidine                     | -0.087 | 0.084 | 0.301 | 0.524 | -0.084 | 0.088 | 0.341 | 0.581 | -0.015 | 0.188 | 0.935 | 0.993 |
| gamma-glutamylmethionine                    | 0.059  | 0.082 | 0.466 | 0.666 | 0.072  | 0.085 | 0.398 | 0.629 | 0.078  | 0.182 | 0.669 | 0.980 |
| gamma-glutamylthreonine                     | 0.059  | 0.080 | 0.461 | 0.660 | 0.096  | 0.083 | 0.250 | 0.479 | 0.191  | 0.179 | 0.288 | 0.873 |
| gamma-glutamyltryptophan                    | 0.202  | 0.084 | 0.018 | 0.087 | 0.194  | 0.087 | 0.027 | 0.114 | 0.051  | 0.186 | 0.784 | 0.988 |
| genistein sulfate*                          | 0.190  | 0.120 | 0.118 | 0.302 | 0.109  | 0.128 | 0.396 | 0.628 | -0.271 | 0.258 | 0.297 | 0.873 |
| gentisate                                   | 0.022  | 0.087 | 0.804 | 0.897 | 0.078  | 0.089 | 0.383 | 0.620 | 0.266  | 0.190 | 0.163 | 0.819 |
| gluconate                                   | 0.066  | 0.089 | 0.456 | 0.656 | 0.080  | 0.093 | 0.388 | 0.622 | 0.087  | 0.198 | 0.662 | 0.980 |
| glucuronate                                 | 0.036  | 0.076 | 0.632 | 0.787 | -0.050 | 0.079 | 0.526 | 0.735 | -0.386 | 0.167 | 0.022 | 0.738 |
| glutamine                                   | -0.138 | 0.093 | 0.142 | 0.337 | -0.117 | 0.097 | 0.232 | 0.462 | 0.045  | 0.208 | 0.830 | 0.988 |
| glutarate (C5-DC)                           | -0.188 | 0.093 | 0.044 | 0.156 | -0.220 | 0.098 | 0.025 | 0.110 | -0.203 | 0.210 | 0.335 | 0.883 |
| glutaryl carnitine (C5)                     | 0.118  | 0.080 | 0.138 | 0.334 | 0.140  | 0.083 | 0.093 | 0.266 | 0.141  | 0.178 | 0.430 | 0.898 |
| glycerate                                   | -0.076 | 0.079 | 0.340 | 0.557 | -0.121 | 0.082 | 0.144 | 0.349 | -0.232 | 0.176 | 0.190 | 0.839 |
| glycerol                                    | 0.103  | 0.082 | 0.208 | 0.420 | 0.100  | 0.085 | 0.243 | 0.474 | 0.022  | 0.183 | 0.906 | 0.992 |
| glycerol 3-phosphate                        | 0.119  | 0.078 | 0.127 | 0.318 | 0.121  | 0.081 | 0.136 | 0.336 | 0.053  | 0.173 | 0.759 | 0.982 |
| glycerophosphoethanolamine                  | -0.015 | 0.085 | 0.858 | 0.927 | 0.024  | 0.089 | 0.786 | 0.900 | 0.175  | 0.190 | 0.359 | 0.887 |
| glycerophosphoglycerol                      | 0.181  | 0.095 | 0.058 | 0.192 | 0.150  | 0.099 | 0.132 | 0.329 | -0.066 | 0.206 | 0.748 | 0.982 |
| glycerophosphorylcholine (GPC)              | -0.163 | 0.092 | 0.079 | 0.232 | -0.113 | 0.096 | 0.244 | 0.475 | 0.170  | 0.205 | 0.408 | 0.893 |
| glycine conjugate of C10H14O2 (1)*          | 0.122  | 0.082 | 0.141 | 0.337 | 0.082  | 0.086 | 0.340 | 0.580 | -0.139 | 0.184 | 0.450 | 0.902 |
| glyco-alpha-muricholate                     | -0.071 | 0.099 | 0.474 | 0.673 | -0.083 | 0.103 | 0.422 | 0.644 | -0.082 | 0.226 | 0.717 | 0.980 |
| glyco-beta-muricholate                      | 0.007  | 0.094 | 0.939 | 0.971 | 0.002  | 0.100 | 0.984 | 0.989 | -0.022 | 0.216 | 0.919 | 0.992 |
| glycochenodeoxycholate                      | 0.087  | 0.076 | 0.250 | 0.471 | 0.083  | 0.079 | 0.292 | 0.529 | 0.014  | 0.169 | 0.934 | 0.993 |
| glycochenodeoxycholate 3-sulfate            | 0.113  | 0.074 | 0.128 | 0.320 | 0.112  | 0.077 | 0.147 | 0.355 | 0.037  | 0.165 | 0.821 | 0.988 |
| glycochenodeoxycholate glucuronide (1)      | 0.107  | 0.076 | 0.161 | 0.357 | 0.123  | 0.079 | 0.121 | 0.309 | 0.114  | 0.169 | 0.503 | 0.922 |
| glycocholate                                | 0.094  | 0.079 | 0.234 | 0.450 | 0.085  | 0.082 | 0.302 | 0.542 | -0.007 | 0.176 | 0.969 | 0.995 |
| glycocholate sulfate*                       | -0.017 | 0.084 | 0.841 | 0.920 | 0.052  | 0.087 | 0.549 | 0.747 | 0.309  | 0.185 | 0.097 | 0.819 |
| glycodeoxycholate                           | 0.092  | 0.095 | 0.336 | 0.554 | 0.091  | 0.102 | 0.373 | 0.614 | 0.018  | 0.221 | 0.937 | 0.993 |
| glycodeoxycholate 3-sulfate                 | 0.070  | 0.093 | 0.456 | 0.656 | 0.085  | 0.099 | 0.394 | 0.627 | 0.086  | 0.210 | 0.682 | 0.980 |
| glycohyocholate                             | -0.040 | 0.086 | 0.640 | 0.792 | -0.069 | 0.091 | 0.445 | 0.664 | -0.143 | 0.192 | 0.458 | 0.902 |
| glycolithocholate                           | -0.086 | 0.099 | 0.385 | 0.598 | -0.066 | 0.106 | 0.534 | 0.742 | 0.069  | 0.226 | 0.761 | 0.982 |
| glycolithocholate sulfate*                  | 0.077  | 0.084 | 0.359 | 0.574 | 0.110  | 0.088 | 0.212 | 0.435 | 0.174  | 0.186 | 0.352 | 0.885 |
| glycosyl ceramide (d18:1/20:0, d16:1/22:0)* | -0.062 | 0.073 | 0.391 | 0.602 | -0.091 | 0.076 | 0.231 | 0.462 | -0.152 | 0.162 | 0.349 | 0.885 |
| glycosyl ceramide (d18:1/23:1, d17:1/24:1)* | -0.150 | 0.062 | 0.017 | 0.084 | -0.171 | 0.066 | 0.010 | 0.056 | -0.144 | 0.144 | 0.321 | 0.875 |
| glycosyl ceramide (d18:2/24:1, d18:1/24:2)* | -0.157 | 0.063 | 0.014 | 0.070 | -0.208 | 0.065 | 0.002 | 0.013 | -0.292 | 0.139 | 0.037 | 0.761 |

|                                                     |        |       |       |       |        |       |       |       |        |       |       |       |
|-----------------------------------------------------|--------|-------|-------|-------|--------|-------|-------|-------|--------|-------|-------|-------|
| glycosyl-N-behenoyl-sphingadienine (d18:2/22:0)*    | -0.129 | 0.082 | 0.115 | 0.298 | -0.165 | 0.086 | 0.055 | 0.190 | -0.203 | 0.182 | 0.264 | 0.848 |
| glycosyl-N-behenoyl-sphingosine (d18:1/22:0)*       | -0.116 | 0.078 | 0.138 | 0.335 | -0.137 | 0.081 | 0.093 | 0.266 | -0.138 | 0.174 | 0.431 | 0.898 |
| glycosyl-N-palmitoyl-sphingosine (d18:1/16:0)       | -0.120 | 0.080 | 0.135 | 0.330 | -0.071 | 0.084 | 0.395 | 0.627 | 0.179  | 0.178 | 0.316 | 0.875 |
| glycosyl-N-stearoyl-sphingosine (d18:1/18:0)        | -0.103 | 0.072 | 0.155 | 0.352 | -0.086 | 0.076 | 0.254 | 0.483 | 0.039  | 0.161 | 0.810 | 0.988 |
| glycosyl-N-tricosanoyl-sphingadienine (d18:2/23:0)* | -0.139 | 0.065 | 0.035 | 0.134 | -0.199 | 0.067 | 0.004 | 0.025 | -0.323 | 0.143 | 0.025 | 0.738 |
| glycoursodeoxycholate                               | -0.045 | 0.080 | 0.571 | 0.745 | -0.032 | 0.083 | 0.699 | 0.838 | 0.044  | 0.178 | 0.807 | 0.988 |
| glycoursodeoxycholate glucuronide (2)               | -0.059 | 0.175 | 0.737 | 0.856 | -0.132 | 0.184 | 0.479 | 0.695 | -0.365 | 0.407 | 0.378 | 0.888 |
| glycyrrhetinate                                     | -0.124 | 0.114 | 0.281 | 0.503 | -0.201 | 0.119 | 0.095 | 0.269 | -0.359 | 0.241 | 0.141 | 0.819 |
| guaiaicol sulfate                                   | 0.054  | 0.072 | 0.449 | 0.651 | 0.150  | 0.074 | 0.044 | 0.164 | 0.455  | 0.156 | 0.004 | 0.738 |
| guanidinoacetate                                    | -0.188 | 0.076 | 0.014 | 0.071 | -0.208 | 0.079 | 0.009 | 0.052 | -0.157 | 0.167 | 0.349 | 0.885 |
| guanidinosuccinate                                  | 0.145  | 0.138 | 0.295 | 0.518 | 0.113  | 0.142 | 0.426 | 0.647 | -0.087 | 0.307 | 0.778 | 0.985 |
| guanosine                                           | -0.041 | 0.100 | 0.684 | 0.815 | -0.004 | 0.107 | 0.971 | 0.982 | 0.128  | 0.209 | 0.540 | 0.947 |
| heme                                                | 0.100  | 0.082 | 0.224 | 0.440 | 0.084  | 0.084 | 0.323 | 0.566 | -0.043 | 0.190 | 0.822 | 0.988 |
| heneicosapentaenoate (21:5n3)                       | -0.076 | 0.096 | 0.431 | 0.635 | -0.101 | 0.103 | 0.331 | 0.573 | -0.142 | 0.236 | 0.549 | 0.947 |
| heptadecenamide (17:1)*                             | 0.128  | 0.107 | 0.233 | 0.450 | 0.152  | 0.108 | 0.164 | 0.380 | 0.197  | 0.267 | 0.462 | 0.902 |
| heptenedioate (C7:1-DC)*                            | 0.049  | 0.096 | 0.613 | 0.775 | -0.001 | 0.098 | 0.995 | 0.995 | -0.186 | 0.201 | 0.357 | 0.887 |
| hexadecadienoate (16:2n6)                           | -0.050 | 0.075 | 0.501 | 0.693 | -0.044 | 0.078 | 0.574 | 0.759 | 0.012  | 0.166 | 0.944 | 0.993 |
| hexadecanedioate (C16)                              | 0.033  | 0.078 | 0.674 | 0.809 | 0.008  | 0.082 | 0.924 | 0.961 | -0.103 | 0.175 | 0.555 | 0.947 |
| hexadecenedioate (C16:1-DC)*                        | 0.001  | 0.069 | 0.985 | 0.990 | -0.045 | 0.072 | 0.528 | 0.735 | -0.212 | 0.153 | 0.167 | 0.825 |
| hexanoylcarnitine (C6)                              | 0.058  | 0.080 | 0.472 | 0.671 | 0.062  | 0.084 | 0.461 | 0.681 | 0.039  | 0.179 | 0.830 | 0.988 |
| hexanoylglutamine                                   | 0.089  | 0.080 | 0.269 | 0.487 | 0.089  | 0.083 | 0.285 | 0.521 | 0.036  | 0.174 | 0.838 | 0.988 |
| hexanoylglycine (C6)                                | -0.077 | 0.088 | 0.381 | 0.595 | -0.134 | 0.089 | 0.131 | 0.328 | -0.291 | 0.187 | 0.121 | 0.819 |
| hippurate                                           | -0.068 | 0.081 | 0.404 | 0.612 | 0.061  | 0.085 | 0.471 | 0.686 | 0.564  | 0.176 | 0.002 | 0.614 |
| histidine                                           | -0.080 | 0.089 | 0.370 | 0.587 | -0.033 | 0.093 | 0.721 | 0.852 | 0.184  | 0.198 | 0.354 | 0.885 |
| histidine betaine (hercynine)*                      | 0.200  | 0.078 | 0.011 | 0.060 | 0.130  | 0.082 | 0.116 | 0.303 | -0.248 | 0.173 | 0.153 | 0.819 |
| homostachydrine*                                    | -0.106 | 0.082 | 0.197 | 0.406 | -0.146 | 0.086 | 0.092 | 0.266 | -0.210 | 0.182 | 0.251 | 0.848 |
| homovanillate (HVA)                                 | 0.063  | 0.099 | 0.529 | 0.713 | 0.070  | 0.101 | 0.490 | 0.705 | 0.063  | 0.224 | 0.778 | 0.985 |
| HWESASXX*                                           | 0.201  | 0.107 | 0.063 | 0.200 | 0.229  | 0.105 | 0.032 | 0.130 | 0.253  | 0.237 | 0.288 | 0.873 |
| hydroquinone sulfate                                | 0.112  | 0.080 | 0.161 | 0.357 | 0.149  | 0.083 | 0.075 | 0.226 | 0.210  | 0.180 | 0.245 | 0.847 |
| hydroxy-CMPF*                                       | -0.024 | 0.046 | 0.607 | 0.773 | -0.013 | 0.048 | 0.784 | 0.899 | 0.039  | 0.102 | 0.701 | 0.980 |
| hydroxycotinine                                     | -0.275 | 0.241 | 0.262 | 0.483 | -0.282 | 0.232 | 0.233 | 0.462 | -0.243 | 0.592 | 0.685 | 0.980 |
| hydroxy-N6,N6,N6-trimethyllysine*                   | 0.178  | 0.081 | 0.030 | 0.123 | 0.224  | 0.084 | 0.008 | 0.049 | 0.275  | 0.180 | 0.129 | 0.819 |
| hydroxypalmitoyl sphingomyelin (d18:1/16:0(OH))     | -0.147 | 0.072 | 0.044 | 0.156 | -0.143 | 0.075 | 0.060 | 0.200 | -0.035 | 0.161 | 0.830 | 0.988 |

|                                               |        |       |       |       |        |       |       |       |        |       |       |       |
|-----------------------------------------------|--------|-------|-------|-------|--------|-------|-------|-------|--------|-------|-------|-------|
| hydroxyproline                                | 0.192  | 0.074 | 0.011 | 0.059 | 0.143  | 0.078 | 0.069 | 0.212 | -0.152 | 0.166 | 0.361 | 0.887 |
| hyocholate                                    | -0.214 | 0.095 | 0.026 | 0.112 | -0.238 | 0.101 | 0.020 | 0.092 | -0.170 | 0.223 | 0.448 | 0.902 |
| hypotaurine                                   | -0.167 | 0.081 | 0.041 | 0.149 | -0.143 | 0.085 | 0.095 | 0.269 | 0.047  | 0.179 | 0.791 | 0.988 |
| hypoxanthine                                  | -0.044 | 0.068 | 0.520 | 0.708 | -0.068 | 0.071 | 0.338 | 0.578 | -0.126 | 0.152 | 0.407 | 0.893 |
| imidazole lactate                             | -0.110 | 0.076 | 0.145 | 0.341 | -0.109 | 0.079 | 0.167 | 0.381 | -0.034 | 0.168 | 0.839 | 0.988 |
| imidazole propionate                          | 0.122  | 0.092 | 0.185 | 0.392 | 0.114  | 0.096 | 0.234 | 0.463 | 0.002  | 0.214 | 0.991 | 0.998 |
| iminodiacetate (IDA)                          | 0.037  | 0.071 | 0.603 | 0.770 | 0.013  | 0.074 | 0.862 | 0.941 | -0.097 | 0.159 | 0.543 | 0.947 |
| indole-3-carboxylate                          | 0.137  | 0.103 | 0.186 | 0.392 | 0.224  | 0.110 | 0.044 | 0.164 | 0.409  | 0.229 | 0.077 | 0.819 |
| indoleacetate                                 | 0.074  | 0.076 | 0.335 | 0.554 | 0.064  | 0.079 | 0.421 | 0.644 | -0.017 | 0.170 | 0.921 | 0.992 |
| indoleacetylcarnitine*                        | 0.049  | 0.090 | 0.586 | 0.755 | 0.091  | 0.094 | 0.334 | 0.574 | 0.202  | 0.198 | 0.309 | 0.873 |
| indoleacetylglutamine                         | 0.094  | 0.107 | 0.380 | 0.594 | 0.095  | 0.110 | 0.388 | 0.622 | 0.044  | 0.233 | 0.852 | 0.988 |
| indolelactate                                 | 0.008  | 0.071 | 0.916 | 0.953 | 0.038  | 0.074 | 0.613 | 0.776 | 0.140  | 0.158 | 0.379 | 0.888 |
| indolepropionate                              | -0.069 | 0.081 | 0.399 | 0.608 | -0.008 | 0.085 | 0.926 | 0.962 | 0.256  | 0.181 | 0.160 | 0.819 |
| indolin-2-one                                 | -0.041 | 0.120 | 0.733 | 0.855 | -0.111 | 0.127 | 0.385 | 0.620 | -0.276 | 0.247 | 0.265 | 0.848 |
| inosine                                       | -0.086 | 0.070 | 0.224 | 0.440 | -0.103 | 0.073 | 0.158 | 0.371 | -0.112 | 0.156 | 0.473 | 0.902 |
| isobutyrylcarnitine (C4)                      | -0.024 | 0.085 | 0.774 | 0.881 | -0.017 | 0.088 | 0.851 | 0.936 | 0.027  | 0.189 | 0.888 | 0.992 |
| isobutyrylglycine (C4)                        | 0.003  | 0.112 | 0.982 | 0.990 | -0.006 | 0.116 | 0.960 | 0.975 | -0.040 | 0.257 | 0.877 | 0.992 |
| isoeugenol sulfate                            | 0.103  | 0.135 | 0.447 | 0.649 | 0.045  | 0.131 | 0.733 | 0.864 | -0.286 | 0.324 | 0.382 | 0.888 |
| isoursodeoxycholate                           | -0.080 | 0.080 | 0.315 | 0.538 | -0.071 | 0.083 | 0.393 | 0.627 | 0.013  | 0.178 | 0.944 | 0.993 |
| isovalerylglycine                             | 0.104  | 0.103 | 0.314 | 0.537 | 0.036  | 0.107 | 0.738 | 0.868 | -0.313 | 0.241 | 0.197 | 0.841 |
| I-urobilinogen                                | 0.057  | 0.122 | 0.642 | 0.792 | 0.022  | 0.128 | 0.864 | 0.941 | -0.144 | 0.277 | 0.606 | 0.963 |
| kynurenate                                    | 0.180  | 0.086 | 0.038 | 0.140 | 0.173  | 0.089 | 0.055 | 0.190 | 0.035  | 0.191 | 0.856 | 0.988 |
| kynurenine                                    | 0.005  | 0.079 | 0.947 | 0.974 | 0.084  | 0.082 | 0.305 | 0.544 | 0.364  | 0.174 | 0.038 | 0.761 |
| lactate                                       | 0.036  | 0.077 | 0.638 | 0.790 | 0.038  | 0.080 | 0.638 | 0.792 | 0.020  | 0.172 | 0.906 | 0.992 |
| lactosyl-N-behenoyl-sphingosine (d18:1/22:0)* | -0.148 | 0.069 | 0.033 | 0.131 | -0.132 | 0.072 | 0.068 | 0.210 | 0.017  | 0.153 | 0.910 | 0.992 |
| lanthionine                                   | 0.160  | 0.084 | 0.058 | 0.192 | 0.163  | 0.087 | 0.064 | 0.205 | 0.071  | 0.186 | 0.704 | 0.980 |
| laurate (12:0)                                | -0.021 | 0.083 | 0.801 | 0.896 | -0.002 | 0.087 | 0.982 | 0.989 | 0.079  | 0.185 | 0.669 | 0.980 |
| laurylcarnitine (C12)                         | -0.044 | 0.087 | 0.611 | 0.775 | -0.008 | 0.091 | 0.928 | 0.962 | 0.149  | 0.194 | 0.445 | 0.902 |
| leukotriene B4                                | 0.022  | 0.116 | 0.849 | 0.922 | 0.075  | 0.117 | 0.523 | 0.732 | 0.237  | 0.243 | 0.330 | 0.880 |
| lignoceroyl sphingomyelin (d18:1/24:0)        | 0.060  | 0.054 | 0.265 | 0.485 | 0.071  | 0.056 | 0.206 | 0.428 | 0.072  | 0.120 | 0.552 | 0.947 |
| lignoceroylcarnitine (C24)*                   | 0.132  | 0.073 | 0.071 | 0.212 | 0.158  | 0.076 | 0.039 | 0.147 | 0.162  | 0.162 | 0.317 | 0.875 |
| linoleate (18:2n6)                            | -0.022 | 0.079 | 0.778 | 0.881 | -0.001 | 0.083 | 0.994 | 0.995 | 0.091  | 0.177 | 0.606 | 0.963 |
| linolenate (18:3n3 or 3n6)                    | -0.031 | 0.072 | 0.664 | 0.806 | -0.025 | 0.075 | 0.742 | 0.870 | 0.019  | 0.161 | 0.909 | 0.992 |



|                                              |        |       |       |       |        |       |       |       |        |       |       |       |
|----------------------------------------------|--------|-------|-------|-------|--------|-------|-------|-------|--------|-------|-------|-------|
| linolenoylcarnitine (C18:3)*                 | -0.014 | 0.069 | 0.842 | 0.920 | -0.010 | 0.071 | 0.889 | 0.949 | 0.013  | 0.156 | 0.934 | 0.993 |
| linoleoyl ethanolamide                       | -0.032 | 0.070 | 0.647 | 0.794 | -0.075 | 0.073 | 0.303 | 0.543 | -0.203 | 0.153 | 0.188 | 0.839 |
| linoleoylcarnitine (C18:2)*                  | -0.043 | 0.069 | 0.535 | 0.716 | 0.005  | 0.072 | 0.945 | 0.969 | 0.202  | 0.153 | 0.187 | 0.839 |
| linoleoylcholine*                            | -0.114 | 0.080 | 0.155 | 0.352 | -0.142 | 0.082 | 0.087 | 0.253 | -0.172 | 0.177 | 0.331 | 0.880 |
| lithocholate sulfate (1)                     | -0.160 | 0.106 | 0.134 | 0.329 | -0.142 | 0.115 | 0.221 | 0.445 | 0.034  | 0.232 | 0.883 | 0.992 |
| L-urobilin                                   | -0.017 | 0.132 | 0.899 | 0.947 | 0.059  | 0.138 | 0.672 | 0.823 | 0.384  | 0.312 | 0.222 | 0.844 |
| malate                                       | 0.012  | 0.077 | 0.874 | 0.931 | 0.075  | 0.080 | 0.349 | 0.587 | 0.291  | 0.170 | 0.089 | 0.819 |
| maleate                                      | 0.051  | 0.081 | 0.526 | 0.712 | 0.022  | 0.084 | 0.793 | 0.903 | -0.115 | 0.180 | 0.526 | 0.942 |
| margarate (17:0)                             | -0.071 | 0.083 | 0.396 | 0.605 | -0.050 | 0.087 | 0.564 | 0.755 | 0.069  | 0.186 | 0.711 | 0.980 |
| margaroylcarnitine (C17)*                    | 0.058  | 0.082 | 0.482 | 0.680 | 0.119  | 0.085 | 0.166 | 0.381 | 0.299  | 0.182 | 0.103 | 0.819 |
| mead acid (20:3n9)                           | -0.038 | 0.103 | 0.710 | 0.840 | -0.034 | 0.113 | 0.768 | 0.887 | 0.029  | 0.276 | 0.917 | 0.992 |
| methionine                                   | 0.098  | 0.084 | 0.243 | 0.462 | 0.103  | 0.087 | 0.238 | 0.469 | 0.059  | 0.186 | 0.753 | 0.982 |
| methionine sulfone                           | -0.036 | 0.082 | 0.661 | 0.805 | -0.010 | 0.086 | 0.910 | 0.957 | 0.107  | 0.183 | 0.559 | 0.947 |
| methionine sulfoxide                         | 0.166  | 0.078 | 0.035 | 0.135 | 0.155  | 0.082 | 0.060 | 0.200 | 0.008  | 0.174 | 0.963 | 0.994 |
| methyl glucopyranoside (alpha + beta)        | -0.167 | 0.080 | 0.037 | 0.139 | -0.217 | 0.082 | 0.009 | 0.051 | -0.296 | 0.179 | 0.100 | 0.819 |
| methyl indole-3-acetate                      | 0.152  | 0.101 | 0.135 | 0.331 | 0.211  | 0.106 | 0.049 | 0.174 | 0.331  | 0.235 | 0.163 | 0.819 |
| methyl-4-hydroxybenzoate sulfate             | -0.077 | 0.076 | 0.311 | 0.533 | -0.071 | 0.078 | 0.367 | 0.604 | -0.002 | 0.168 | 0.989 | 0.998 |
| methylnaphthyl sulfate (2)*                  | -0.075 | 0.070 | 0.284 | 0.507 | -0.113 | 0.072 | 0.117 | 0.303 | -0.215 | 0.159 | 0.179 | 0.839 |
| methylsuccinate                              | -0.021 | 0.086 | 0.810 | 0.901 | 0.014  | 0.089 | 0.879 | 0.944 | 0.149  | 0.191 | 0.435 | 0.900 |
| myo-inositol                                 | 0.068  | 0.082 | 0.406 | 0.614 | 0.046  | 0.085 | 0.593 | 0.765 | -0.078 | 0.182 | 0.669 | 0.980 |
| myristate (14:0)                             | 0.022  | 0.079 | 0.780 | 0.881 | 0.069  | 0.083 | 0.403 | 0.633 | 0.222  | 0.176 | 0.210 | 0.841 |
| myristoleate (14:1n5)                        | -0.129 | 0.075 | 0.087 | 0.249 | -0.102 | 0.078 | 0.194 | 0.417 | 0.075  | 0.167 | 0.653 | 0.980 |
| myristoleoylcarnitine (C14:1)*               | -0.077 | 0.082 | 0.344 | 0.559 | -0.042 | 0.085 | 0.620 | 0.779 | 0.132  | 0.182 | 0.467 | 0.902 |
| myristoylcarnitine (C14)                     | 0.046  | 0.087 | 0.599 | 0.766 | 0.079  | 0.091 | 0.382 | 0.620 | 0.170  | 0.194 | 0.383 | 0.888 |
| N-(2-furoyl)glycine                          | 0.009  | 0.112 | 0.938 | 0.970 | -0.050 | 0.113 | 0.660 | 0.811 | -0.250 | 0.236 | 0.292 | 0.873 |
| N,N,N-trimethyl-5-aminovalerate              | 0.094  | 0.072 | 0.189 | 0.395 | 0.075  | 0.075 | 0.314 | 0.554 | -0.052 | 0.159 | 0.743 | 0.982 |
| N,N,N-trimethyl-alanylproline betaine (TMAP) | 0.161  | 0.084 | 0.057 | 0.191 | 0.150  | 0.088 | 0.088 | 0.256 | 0.009  | 0.187 | 0.963 | 0.994 |
| N1-Methyl-2-pyridone-5-carboxamide           | 0.149  | 0.076 | 0.051 | 0.175 | 0.187  | 0.079 | 0.018 | 0.087 | 0.230  | 0.168 | 0.173 | 0.833 |
| N1-methylinosine                             | 0.165  | 0.086 | 0.057 | 0.192 | 0.234  | 0.089 | 0.009 | 0.052 | 0.376  | 0.190 | 0.050 | 0.819 |
| N2,N2-dimethylguanosine                      | 0.222  | 0.093 | 0.018 | 0.086 | 0.274  | 0.096 | 0.005 | 0.031 | 0.317  | 0.205 | 0.124 | 0.819 |
| N2,N5-diacetylorithine                       | 0.010  | 0.069 | 0.890 | 0.941 | 0.013  | 0.072 | 0.861 | 0.941 | 0.017  | 0.153 | 0.910 | 0.992 |
| N2-acetyl,N6-methyllysine                    | -0.118 | 0.102 | 0.252 | 0.471 | -0.133 | 0.106 | 0.216 | 0.440 | -0.117 | 0.248 | 0.639 | 0.978 |
| N4-acetylcytidine                            | 0.200  | 0.080 | 0.014 | 0.070 | 0.199  | 0.084 | 0.019 | 0.088 | 0.068  | 0.179 | 0.705 | 0.980 |

|                                           |        |       |       |       |        |       |       |       |        |       |       |       |
|-------------------------------------------|--------|-------|-------|-------|--------|-------|-------|-------|--------|-------|-------|-------|
| N6,N6-dimethyllysine                      | 0.121  | 0.083 | 0.150 | 0.346 | 0.164  | 0.086 | 0.060 | 0.200 | 0.247  | 0.188 | 0.190 | 0.839 |
| N6-acetyllysine                           | 0.193  | 0.081 | 0.018 | 0.088 | 0.229  | 0.084 | 0.007 | 0.043 | 0.236  | 0.180 | 0.193 | 0.839 |
| N6-carbamoylthreonyladenosine             | 0.205  | 0.093 | 0.028 | 0.118 | 0.220  | 0.096 | 0.024 | 0.105 | 0.143  | 0.208 | 0.493 | 0.912 |
| N6-methyllysine                           | -0.088 | 0.082 | 0.287 | 0.510 | -0.052 | 0.086 | 0.546 | 0.744 | 0.132  | 0.183 | 0.473 | 0.902 |
| N-acetyl-1-methylhistidine*               | 0.059  | 0.136 | 0.667 | 0.806 | 0.100  | 0.143 | 0.489 | 0.704 | 0.234  | 0.334 | 0.486 | 0.905 |
| N-acetyl-2-aminooctanoate*                | 0.097  | 0.081 | 0.233 | 0.450 | 0.064  | 0.084 | 0.452 | 0.672 | -0.116 | 0.180 | 0.520 | 0.941 |
| N-acetyllallin                            | 0.201  | 0.094 | 0.034 | 0.133 | 0.226  | 0.096 | 0.020 | 0.094 | 0.198  | 0.206 | 0.338 | 0.883 |
| N-acetylarginine                          | 0.024  | 0.086 | 0.782 | 0.883 | 0.078  | 0.089 | 0.386 | 0.622 | 0.254  | 0.191 | 0.184 | 0.839 |
| N-acetylaspartate (NAA)                   | -0.144 | 0.090 | 0.109 | 0.288 | -0.132 | 0.093 | 0.157 | 0.371 | -0.002 | 0.195 | 0.993 | 0.999 |
| N-acetyl-aspartyl-glutamate (NAAG)        | 0.049  | 0.099 | 0.618 | 0.778 | -0.008 | 0.103 | 0.938 | 0.966 | -0.243 | 0.219 | 0.270 | 0.855 |
| N-acetyl-beta-alanine                     | 0.076  | 0.080 | 0.341 | 0.557 | 0.107  | 0.083 | 0.197 | 0.420 | 0.168  | 0.176 | 0.341 | 0.885 |
| N-acetylcitrulline                        | 0.101  | 0.128 | 0.435 | 0.636 | 0.087  | 0.134 | 0.519 | 0.730 | -0.029 | 0.289 | 0.920 | 0.992 |
| N-acetylglucosamine/N-acetylgalactosamine | 0.228  | 0.094 | 0.016 | 0.081 | 0.250  | 0.098 | 0.011 | 0.061 | 0.183  | 0.209 | 0.382 | 0.888 |
| N-acetylglucosaminylasparagine            | 0.333  | 0.125 | 0.009 | 0.053 | 0.270  | 0.132 | 0.044 | 0.164 | -0.170 | 0.280 | 0.547 | 0.947 |
| N-acetylglutamine                         | 0.101  | 0.084 | 0.232 | 0.450 | 0.095  | 0.088 | 0.281 | 0.516 | 0.010  | 0.188 | 0.959 | 0.994 |
| N-acetylhistidine                         | 0.014  | 0.097 | 0.886 | 0.938 | 0.041  | 0.105 | 0.702 | 0.840 | 0.122  | 0.225 | 0.587 | 0.959 |
| N-acetyl-isoputresnine*                   | 0.019  | 0.089 | 0.828 | 0.914 | 0.052  | 0.093 | 0.573 | 0.758 | 0.158  | 0.198 | 0.428 | 0.897 |
| N-acetylmethionine                        | -0.066 | 0.074 | 0.376 | 0.591 | -0.075 | 0.077 | 0.332 | 0.573 | -0.067 | 0.166 | 0.689 | 0.980 |
| N-acetylneuraminate                       | 0.041  | 0.097 | 0.673 | 0.809 | 0.052  | 0.101 | 0.605 | 0.770 | 0.066  | 0.216 | 0.760 | 0.982 |
| N-acetylproline                           | 0.131  | 0.097 | 0.178 | 0.383 | 0.194  | 0.100 | 0.055 | 0.190 | 0.340  | 0.217 | 0.120 | 0.819 |
| N-acetylserine                            | 0.111  | 0.090 | 0.218 | 0.433 | 0.102  | 0.093 | 0.276 | 0.510 | 0.001  | 0.200 | 0.996 | 0.999 |
| N-acetyltaurine                           | -0.060 | 0.073 | 0.418 | 0.623 | -0.072 | 0.076 | 0.347 | 0.586 | -0.080 | 0.165 | 0.631 | 0.974 |
| N-acetylthreonine                         | 0.215  | 0.087 | 0.015 | 0.074 | 0.207  | 0.091 | 0.024 | 0.106 | 0.043  | 0.195 | 0.824 | 0.988 |
| N-behenoyl-sphingadienine (d18:2/22:0)*   | 0.101  | 0.067 | 0.134 | 0.329 | 0.090  | 0.070 | 0.201 | 0.426 | -0.015 | 0.150 | 0.921 | 0.992 |
| N-carbamoylvaline                         | 0.156  | 0.085 | 0.068 | 0.212 | 0.106  | 0.089 | 0.232 | 0.462 | -0.165 | 0.187 | 0.381 | 0.888 |
| N-delta-acetylorithine                    | 0.070  | 0.080 | 0.383 | 0.597 | 0.094  | 0.083 | 0.261 | 0.491 | 0.135  | 0.179 | 0.451 | 0.902 |
| nervonoylcarnitine (C24:1)*               | 0.065  | 0.050 | 0.194 | 0.403 | 0.061  | 0.053 | 0.250 | 0.480 | -0.004 | 0.119 | 0.974 | 0.995 |
| N-formylanthranilic acid                  | 0.023  | 0.084 | 0.789 | 0.886 | 0.016  | 0.087 | 0.851 | 0.936 | -0.020 | 0.187 | 0.917 | 0.992 |
| N-formylmethionine                        | 0.065  | 0.087 | 0.458 | 0.658 | 0.049  | 0.091 | 0.590 | 0.765 | -0.049 | 0.195 | 0.804 | 0.988 |
| N-formylphenylalanine                     | 0.135  | 0.101 | 0.183 | 0.389 | 0.098  | 0.106 | 0.358 | 0.596 | -0.136 | 0.232 | 0.560 | 0.947 |
| nicotinamide                              | 0.023  | 0.074 | 0.754 | 0.870 | -0.012 | 0.077 | 0.874 | 0.944 | -0.154 | 0.165 | 0.354 | 0.885 |
| nisinate (24:6n3)                         | 0.172  | 0.085 | 0.044 | 0.156 | 0.139  | 0.087 | 0.112 | 0.295 | -0.086 | 0.191 | 0.655 | 0.980 |
| N-linoleoylglycine                        | -0.055 | 0.108 | 0.612 | 0.775 | -0.101 | 0.107 | 0.349 | 0.587 | -0.229 | 0.223 | 0.308 | 0.873 |

|                                               |        |       |       |       |        |       |       |       |        |       |       |       |
|-----------------------------------------------|--------|-------|-------|-------|--------|-------|-------|-------|--------|-------|-------|-------|
| N-linoleoylserine*                            | 0.022  | 0.085 | 0.795 | 0.891 | 0.026  | 0.091 | 0.777 | 0.893 | 0.022  | 0.195 | 0.910 | 0.992 |
| N-linoleoyltaurine*                           | 0.074  | 0.104 | 0.479 | 0.675 | 0.079  | 0.102 | 0.441 | 0.662 | 0.066  | 0.211 | 0.757 | 0.982 |
| N-methylhydroxyproline                        | -0.020 | 0.098 | 0.841 | 0.920 | -0.087 | 0.103 | 0.400 | 0.630 | -0.355 | 0.233 | 0.132 | 0.819 |
| N-methylpiperolate                            | -0.042 | 0.084 | 0.616 | 0.776 | 0.011  | 0.088 | 0.902 | 0.955 | 0.227  | 0.187 | 0.227 | 0.844 |
| N-methylproline                               | 0.014  | 0.081 | 0.864 | 0.930 | -0.071 | 0.084 | 0.400 | 0.630 | -0.407 | 0.184 | 0.028 | 0.738 |
| N-oleoylserine                                | -0.115 | 0.080 | 0.149 | 0.345 | -0.129 | 0.083 | 0.122 | 0.311 | -0.103 | 0.177 | 0.561 | 0.947 |
| N-oleoyltaurine                               | 0.089  | 0.075 | 0.237 | 0.454 | 0.103  | 0.078 | 0.189 | 0.411 | 0.097  | 0.169 | 0.569 | 0.947 |
| nonadecanoate (19:0)                          | 0.033  | 0.078 | 0.671 | 0.809 | 0.009  | 0.082 | 0.913 | 0.959 | -0.099 | 0.175 | 0.571 | 0.947 |
| nonanoylcarnitine (C9)                        | 0.018  | 0.101 | 0.858 | 0.927 | 0.019  | 0.102 | 0.853 | 0.936 | 0.013  | 0.225 | 0.955 | 0.994 |
| N-palmitoylglycine                            | 0.013  | 0.081 | 0.874 | 0.931 | 0.013  | 0.085 | 0.880 | 0.944 | 0.004  | 0.181 | 0.983 | 0.997 |
| N-palmitoyl-heptadecaphingosine (d17:1/16:0)* | 0.130  | 0.094 | 0.169 | 0.371 | 0.183  | 0.096 | 0.060 | 0.200 | 0.299  | 0.209 | 0.155 | 0.819 |
| N-palmitoylserine                             | -0.133 | 0.130 | 0.308 | 0.530 | -0.076 | 0.145 | 0.602 | 0.769 | 0.212  | 0.291 | 0.468 | 0.902 |
| N-palmitoyl-sphingadienine (d18:2/16:0)*      | 0.083  | 0.078 | 0.289 | 0.512 | 0.105  | 0.081 | 0.198 | 0.420 | 0.130  | 0.174 | 0.456 | 0.902 |
| N-stearoylserine*                             | -0.041 | 0.110 | 0.710 | 0.840 | -0.023 | 0.115 | 0.844 | 0.934 | 0.070  | 0.246 | 0.778 | 0.985 |
| N-stearoyltaurine                             | -0.092 | 0.095 | 0.336 | 0.554 | -0.080 | 0.103 | 0.443 | 0.663 | 0.053  | 0.237 | 0.823 | 0.988 |
| O-acetylhomoserine                            | 0.085  | 0.098 | 0.388 | 0.598 | 0.052  | 0.105 | 0.618 | 0.778 | -0.126 | 0.224 | 0.573 | 0.947 |
| o-cresol sulfate                              | 0.114  | 0.071 | 0.112 | 0.293 | 0.100  | 0.075 | 0.179 | 0.398 | -0.020 | 0.160 | 0.899 | 0.992 |
| octadecadienedioate (C18:2-DC)*               | 0.082  | 0.083 | 0.322 | 0.542 | 0.010  | 0.086 | 0.909 | 0.957 | -0.300 | 0.183 | 0.104 | 0.819 |
| octadecanedioate (C18)                        | 0.071  | 0.081 | 0.382 | 0.596 | 0.018  | 0.086 | 0.834 | 0.927 | -0.227 | 0.185 | 0.221 | 0.844 |
| octadecanedioylcarnitine (C18-DC)*            | 0.025  | 0.075 | 0.734 | 0.855 | 0.056  | 0.078 | 0.472 | 0.686 | 0.149  | 0.166 | 0.371 | 0.888 |
| octadecenedioate (C18:1-DC)*                  | 0.074  | 0.071 | 0.296 | 0.519 | 0.015  | 0.074 | 0.840 | 0.931 | -0.243 | 0.157 | 0.123 | 0.819 |
| octadecenedioylcarnitine (C18:1-DC)*          | 0.004  | 0.070 | 0.949 | 0.976 | -0.018 | 0.073 | 0.808 | 0.911 | -0.100 | 0.157 | 0.524 | 0.942 |
| octanoylcarnitine (C8)                        | -0.024 | 0.085 | 0.778 | 0.881 | -0.012 | 0.089 | 0.893 | 0.949 | 0.046  | 0.190 | 0.809 | 0.988 |
| oleate/vaccenate (18:1)                       | -0.002 | 0.080 | 0.982 | 0.990 | 0.010  | 0.083 | 0.904 | 0.955 | 0.054  | 0.178 | 0.764 | 0.982 |
| oleoyl ethanolamide                           | -0.041 | 0.074 | 0.577 | 0.749 | -0.064 | 0.077 | 0.403 | 0.632 | -0.121 | 0.164 | 0.463 | 0.902 |
| oleoylcarnitine (C18)                         | -0.013 | 0.070 | 0.852 | 0.924 | 0.040  | 0.073 | 0.589 | 0.765 | 0.236  | 0.156 | 0.132 | 0.819 |
| oleoylcholine                                 | -0.155 | 0.079 | 0.051 | 0.176 | -0.171 | 0.082 | 0.039 | 0.147 | -0.131 | 0.176 | 0.460 | 0.902 |
| ornithine                                     | 0.168  | 0.087 | 0.055 | 0.186 | 0.174  | 0.090 | 0.055 | 0.190 | 0.091  | 0.194 | 0.638 | 0.977 |
| orotate                                       | 0.020  | 0.099 | 0.840 | 0.920 | 0.016  | 0.103 | 0.875 | 0.944 | -0.010 | 0.220 | 0.965 | 0.994 |
| orotidine                                     | 0.191  | 0.102 | 0.062 | 0.199 | 0.178  | 0.106 | 0.097 | 0.273 | 0.009  | 0.226 | 0.970 | 0.995 |
| O-sulfo-L-tyrosine                            | 0.115  | 0.088 | 0.192 | 0.400 | 0.142  | 0.091 | 0.121 | 0.309 | 0.166  | 0.195 | 0.394 | 0.893 |
| oxalate (ethanedioate)                        | -0.050 | 0.084 | 0.548 | 0.726 | -0.104 | 0.087 | 0.233 | 0.462 | -0.262 | 0.185 | 0.158 | 0.819 |
| palmitate (16:0)                              | 0.043  | 0.083 | 0.609 | 0.775 | 0.070  | 0.087 | 0.424 | 0.644 | 0.138  | 0.186 | 0.458 | 0.902 |

|                                                    |        |       |       |       |        |       |       |       |        |       |       |       |
|----------------------------------------------------|--------|-------|-------|-------|--------|-------|-------|-------|--------|-------|-------|-------|
| palmitoleamide (16:1)*                             | 0.150  | 0.082 | 0.068 | 0.212 | 0.187  | 0.085 | 0.029 | 0.120 | 0.223  | 0.183 | 0.226 | 0.844 |
| palmitoleate (16:1n7)                              | -0.050 | 0.077 | 0.519 | 0.708 | -0.015 | 0.080 | 0.848 | 0.935 | 0.139  | 0.171 | 0.420 | 0.893 |
| palmitoleoylcarnitine (C16:1)*                     | -0.075 | 0.077 | 0.328 | 0.548 | -0.040 | 0.080 | 0.616 | 0.777 | 0.133  | 0.171 | 0.440 | 0.900 |
| palmitoyl dihydrosphingomyelin (d18:0/16:0)*       | -0.034 | 0.077 | 0.662 | 0.805 | -0.037 | 0.081 | 0.643 | 0.796 | -0.028 | 0.173 | 0.869 | 0.992 |
| palmitoyl sphingomyelin (d18:1/16:0)               | -0.139 | 0.076 | 0.070 | 0.212 | -0.120 | 0.080 | 0.134 | 0.331 | 0.036  | 0.171 | 0.832 | 0.988 |
| palmitoylcarnitine (C16)                           | 0.148  | 0.082 | 0.072 | 0.214 | 0.237  | 0.084 | 0.005 | 0.035 | 0.459  | 0.179 | 0.011 | 0.738 |
| palmitoylcholine                                   | -0.119 | 0.081 | 0.145 | 0.341 | -0.132 | 0.085 | 0.120 | 0.308 | -0.104 | 0.182 | 0.566 | 0.947 |
| paraxanthine                                       | -0.077 | 0.147 | 0.603 | 0.770 | -0.111 | 0.161 | 0.493 | 0.706 | -0.200 | 0.392 | 0.612 | 0.969 |
| p-cresol glucuronide*                              | -0.082 | 0.098 | 0.403 | 0.612 | -0.052 | 0.102 | 0.615 | 0.777 | 0.105  | 0.215 | 0.626 | 0.973 |
| p-cresol sulfate                                   | -0.101 | 0.083 | 0.228 | 0.445 | -0.024 | 0.087 | 0.781 | 0.896 | 0.313  | 0.185 | 0.092 | 0.819 |
| pentadecanoate (15:0)                              | 0.001  | 0.079 | 0.994 | 0.997 | 0.046  | 0.082 | 0.579 | 0.762 | 0.205  | 0.175 | 0.243 | 0.847 |
| perfluorooctanesulfonate (PFOS)                    | 0.107  | 0.050 | 0.033 | 0.131 | 0.065  | 0.052 | 0.218 | 0.443 | -0.155 | 0.110 | 0.162 | 0.819 |
| perfluorooctanoate (PFOA)*                         | 0.066  | 0.036 | 0.069 | 0.212 | 0.076  | 0.038 | 0.044 | 0.164 | 0.070  | 0.080 | 0.387 | 0.889 |
| phenol glucuronide                                 | -0.011 | 0.101 | 0.916 | 0.953 | 0.066  | 0.106 | 0.536 | 0.742 | 0.367  | 0.232 | 0.117 | 0.819 |
| phenol sulfate                                     | 0.087  | 0.083 | 0.299 | 0.522 | 0.090  | 0.087 | 0.298 | 0.538 | 0.049  | 0.185 | 0.794 | 0.988 |
| phenylacetate                                      | -0.185 | 0.106 | 0.082 | 0.239 | -0.154 | 0.106 | 0.151 | 0.361 | 0.052  | 0.229 | 0.822 | 0.988 |
| phenylacetylcarnitine                              | -0.016 | 0.092 | 0.863 | 0.930 | -0.028 | 0.094 | 0.770 | 0.888 | -0.060 | 0.202 | 0.766 | 0.982 |
| phenylacetylglutamate                              | 0.094  | 0.145 | 0.520 | 0.708 | 0.065  | 0.151 | 0.669 | 0.820 | -0.118 | 0.346 | 0.733 | 0.981 |
| phenylacetylglutamine                              | -0.045 | 0.085 | 0.598 | 0.766 | 0.015  | 0.089 | 0.868 | 0.943 | 0.258  | 0.190 | 0.176 | 0.839 |
| phenyllactate (PLA)                                | 0.068  | 0.072 | 0.350 | 0.564 | 0.052  | 0.076 | 0.493 | 0.706 | -0.048 | 0.162 | 0.766 | 0.982 |
| phenylpyruvate                                     | 0.082  | 0.082 | 0.321 | 0.542 | 0.062  | 0.086 | 0.473 | 0.686 | -0.062 | 0.184 | 0.737 | 0.981 |
| phosphate                                          | -0.072 | 0.087 | 0.408 | 0.616 | -0.083 | 0.091 | 0.360 | 0.597 | -0.077 | 0.194 | 0.695 | 0.980 |
| phosphocholine                                     | 0.168  | 0.082 | 0.043 | 0.154 | 0.139  | 0.086 | 0.108 | 0.289 | -0.070 | 0.184 | 0.703 | 0.980 |
| phosphoethanolamine (PE)                           | 0.122  | 0.083 | 0.145 | 0.341 | 0.060  | 0.087 | 0.493 | 0.706 | -0.238 | 0.184 | 0.198 | 0.841 |
| picolinate                                         | -0.131 | 0.127 | 0.304 | 0.526 | -0.093 | 0.132 | 0.484 | 0.700 | 0.101  | 0.264 | 0.705 | 0.980 |
| pimelate (C7-DC)                                   | -0.007 | 0.115 | 0.952 | 0.977 | -0.039 | 0.116 | 0.736 | 0.866 | -0.167 | 0.262 | 0.526 | 0.942 |
| pimeloylcarnitine/3-methyladipoylcarnitine (C7-DC) | 0.239  | 0.112 | 0.036 | 0.136 | 0.189  | 0.120 | 0.118 | 0.303 | -0.190 | 0.269 | 0.482 | 0.902 |
| pipecolate                                         | 0.105  | 0.087 | 0.231 | 0.448 | 0.190  | 0.090 | 0.037 | 0.142 | 0.425  | 0.192 | 0.028 | 0.738 |
| piperine                                           | 0.268  | 0.114 | 0.021 | 0.094 | 0.196  | 0.119 | 0.102 | 0.281 | -0.251 | 0.261 | 0.339 | 0.885 |
| pregnanediol-3-glucuronide                         | -0.079 | 0.089 | 0.380 | 0.594 | -0.136 | 0.092 | 0.140 | 0.344 | -0.288 | 0.194 | 0.139 | 0.819 |
| pregnanolone/allopregnanolone sulfate              | 0.102  | 0.114 | 0.371 | 0.587 | 0.112  | 0.126 | 0.377 | 0.617 | 0.055  | 0.256 | 0.832 | 0.988 |
| pregnen-diol disulfate*                            | -0.028 | 0.066 | 0.671 | 0.809 | -0.055 | 0.068 | 0.425 | 0.646 | -0.132 | 0.146 | 0.369 | 0.888 |
| pregnenediol sulfate (C21H34O5S)*                  | -0.163 | 0.066 | 0.015 | 0.075 | -0.210 | 0.068 | 0.003 | 0.018 | -0.273 | 0.146 | 0.064 | 0.819 |

|                                                     |        |       |       |       |        |       |       |       |        |       |       |       |
|-----------------------------------------------------|--------|-------|-------|-------|--------|-------|-------|-------|--------|-------|-------|-------|
| pregnenetriol disulfate*                            | 0.082  | 0.066 | 0.211 | 0.424 | 0.042  | 0.068 | 0.542 | 0.744 | -0.154 | 0.146 | 0.291 | 0.873 |
| pregnenetriol sulfate*                              | 0.012  | 0.063 | 0.853 | 0.924 | -0.040 | 0.066 | 0.542 | 0.744 | -0.233 | 0.140 | 0.098 | 0.819 |
| pregnenolone sulfate                                | -0.160 | 0.069 | 0.022 | 0.097 | -0.187 | 0.073 | 0.011 | 0.061 | -0.168 | 0.155 | 0.281 | 0.869 |
| propionylglycine (C3)                               | -0.212 | 0.086 | 0.015 | 0.073 | -0.180 | 0.090 | 0.046 | 0.168 | 0.063  | 0.190 | 0.741 | 0.981 |
| propyl 4-hydroxybenzoate sulfate                    | -0.050 | 0.125 | 0.688 | 0.818 | -0.100 | 0.129 | 0.443 | 0.663 | -0.244 | 0.276 | 0.382 | 0.888 |
| pseudouridine                                       | 0.148  | 0.089 | 0.099 | 0.273 | 0.165  | 0.093 | 0.078 | 0.234 | 0.130  | 0.199 | 0.515 | 0.939 |
| pyridoxal                                           | 0.083  | 0.108 | 0.444 | 0.646 | 0.156  | 0.113 | 0.166 | 0.381 | 0.364  | 0.240 | 0.131 | 0.819 |
| pyroglutamine*                                      | -0.113 | 0.057 | 0.047 | 0.163 | -0.068 | 0.060 | 0.256 | 0.486 | 0.168  | 0.126 | 0.185 | 0.839 |
| pyruvate                                            | 0.010  | 0.078 | 0.896 | 0.945 | 0.050  | 0.081 | 0.536 | 0.742 | 0.187  | 0.174 | 0.283 | 0.869 |
| quininate                                           | -0.013 | 0.085 | 0.882 | 0.936 | -0.022 | 0.089 | 0.806 | 0.910 | -0.048 | 0.195 | 0.805 | 0.988 |
| quinolinate                                         | 0.120  | 0.090 | 0.185 | 0.392 | 0.175  | 0.094 | 0.063 | 0.204 | 0.292  | 0.199 | 0.144 | 0.819 |
| ribitol                                             | 0.075  | 0.080 | 0.350 | 0.564 | 0.068  | 0.084 | 0.417 | 0.643 | -0.005 | 0.179 | 0.978 | 0.996 |
| ribonate (ribonolactone)                            | 0.051  | 0.088 | 0.567 | 0.742 | 0.077  | 0.092 | 0.400 | 0.630 | 0.140  | 0.196 | 0.476 | 0.902 |
| ribulonate/xylulonate*                              | 0.118  | 0.087 | 0.174 | 0.378 | 0.053  | 0.090 | 0.560 | 0.755 | -0.248 | 0.189 | 0.192 | 0.839 |
| S-(3-hydroxypropyl)mercapturic acid (HPMA)          | 0.078  | 0.112 | 0.489 | 0.683 | 0.089  | 0.119 | 0.457 | 0.676 | 0.084  | 0.303 | 0.784 | 0.988 |
| S-1-pyrroline-5-carboxylate                         | 0.042  | 0.090 | 0.638 | 0.790 | 0.007  | 0.093 | 0.939 | 0.966 | -0.146 | 0.200 | 0.468 | 0.902 |
| saccharin                                           | 0.022  | 0.136 | 0.873 | 0.931 | 0.036  | 0.154 | 0.816 | 0.915 | 0.077  | 0.372 | 0.837 | 0.988 |
| salicylate                                          | 0.040  | 0.084 | 0.631 | 0.785 | 0.059  | 0.087 | 0.504 | 0.716 | 0.097  | 0.187 | 0.605 | 0.963 |
| salicyluric glucuronide*                            | 0.333  | 0.195 | 0.107 | 0.286 | 0.160  | 0.201 | 0.438 | 0.660 | -0.735 | 0.419 | 0.100 | 0.819 |
| S-allylcysteine                                     | -0.031 | 0.088 | 0.727 | 0.852 | 0.026  | 0.091 | 0.777 | 0.893 | 0.258  | 0.198 | 0.195 | 0.839 |
| sarcosine                                           | 0.117  | 0.080 | 0.148 | 0.344 | 0.042  | 0.084 | 0.622 | 0.780 | -0.301 | 0.178 | 0.092 | 0.819 |
| sebacate (C10-DC)                                   | -0.024 | 0.076 | 0.751 | 0.868 | -0.064 | 0.079 | 0.419 | 0.644 | -0.191 | 0.169 | 0.260 | 0.848 |
| S-methylcysteine                                    | 0.093  | 0.078 | 0.239 | 0.455 | 0.112  | 0.081 | 0.170 | 0.384 | 0.123  | 0.174 | 0.480 | 0.902 |
| S-methylcysteine sulfoxide                          | 0.056  | 0.078 | 0.472 | 0.671 | 0.012  | 0.081 | 0.883 | 0.944 | -0.181 | 0.173 | 0.297 | 0.873 |
| S-methylmethionine                                  | 0.111  | 0.077 | 0.152 | 0.348 | 0.101  | 0.081 | 0.214 | 0.438 | -0.007 | 0.172 | 0.968 | 0.995 |
| spermidine                                          | 0.133  | 0.083 | 0.113 | 0.293 | 0.198  | 0.089 | 0.028 | 0.117 | 0.343  | 0.197 | 0.084 | 0.819 |
| sphinganine                                         | 0.164  | 0.080 | 0.042 | 0.151 | 0.158  | 0.084 | 0.061 | 0.200 | 0.030  | 0.179 | 0.867 | 0.992 |
| sphinganine-1-phosphate                             | -0.068 | 0.088 | 0.437 | 0.638 | -0.107 | 0.091 | 0.242 | 0.473 | -0.201 | 0.195 | 0.303 | 0.873 |
| sphingomyelin (d17:1/14:0, d16:1/15:0)*             | 0.111  | 0.071 | 0.120 | 0.303 | 0.113  | 0.074 | 0.127 | 0.322 | 0.051  | 0.158 | 0.749 | 0.982 |
| sphingomyelin (d17:1/16:0, d18:1/15:0, d16:1/17:0)* | -0.008 | 0.072 | 0.908 | 0.953 | 0.004  | 0.075 | 0.957 | 0.973 | 0.053  | 0.160 | 0.739 | 0.981 |
| sphingomyelin (d18:1/17:0, d17:1/18:0, d19:1/16:0)  | -0.110 | 0.069 | 0.110 | 0.289 | -0.105 | 0.071 | 0.145 | 0.350 | -0.016 | 0.153 | 0.918 | 0.992 |
| sphingomyelin (d18:1/19:0, d19:1/18:0)*             | 0.158  | 0.076 | 0.040 | 0.149 | 0.132  | 0.080 | 0.100 | 0.279 | -0.059 | 0.170 | 0.728 | 0.980 |
| sphingomyelin (d18:1/20:0, d16:1/22:0)*             | 0.160  | 0.075 | 0.035 | 0.134 | 0.145  | 0.079 | 0.067 | 0.210 | -0.013 | 0.168 | 0.941 | 0.993 |

|                                                                 |        |       |       |       |        |       |       |       |        |       |       |       |
|-----------------------------------------------------------------|--------|-------|-------|-------|--------|-------|-------|-------|--------|-------|-------|-------|
| sphingomyelin (d18:1/20:1, d18:2/20:0)*                         | 0.008  | 0.071 | 0.912 | 0.953 | -0.072 | 0.073 | 0.325 | 0.566 | -0.363 | 0.155 | 0.020 | 0.738 |
| sphingomyelin (d18:1/20:2, d18:2/20:1, d16:1/22:2)*             | 0.058  | 0.071 | 0.412 | 0.618 | 0.065  | 0.074 | 0.381 | 0.620 | 0.052  | 0.162 | 0.749 | 0.982 |
| sphingomyelin (d18:1/22:1, d18:2/22:0, d16:1/24:1)*             | 0.133  | 0.068 | 0.053 | 0.180 | 0.091  | 0.071 | 0.205 | 0.428 | -0.144 | 0.152 | 0.344 | 0.885 |
| sphingomyelin (d18:1/22:2, d18:2/22:1, d16:1/24:2)*             | 0.074  | 0.057 | 0.196 | 0.406 | 0.011  | 0.060 | 0.859 | 0.941 | -0.261 | 0.125 | 0.038 | 0.761 |
| sphingomyelin (d18:1/24:1, d18:2/24:0)*                         | 0.041  | 0.050 | 0.413 | 0.618 | 0.029  | 0.052 | 0.587 | 0.765 | -0.043 | 0.112 | 0.702 | 0.980 |
| sphingomyelin (d18:1/25:0, d19:0/24:1, d20:1/23:0, d19:1/24:0)* | 0.085  | 0.059 | 0.152 | 0.348 | 0.080  | 0.062 | 0.197 | 0.420 | 0.007  | 0.132 | 0.958 | 0.994 |
| sphingomyelin (d18:2/16:0, d18:1/16:1)*                         | 0.133  | 0.073 | 0.069 | 0.212 | 0.157  | 0.076 | 0.039 | 0.147 | 0.159  | 0.162 | 0.328 | 0.880 |
| sphingomyelin (d18:2/18:1)*                                     | 0.002  | 0.073 | 0.977 | 0.990 | -0.030 | 0.076 | 0.697 | 0.838 | -0.145 | 0.163 | 0.375 | 0.888 |
| sphingomyelin (d18:2/23:0, d18:1/23:1, d17:1/24:1)*             | 0.084  | 0.067 | 0.214 | 0.427 | 0.065  | 0.070 | 0.354 | 0.590 | -0.055 | 0.150 | 0.716 | 0.980 |
| sphingomyelin (d18:2/23:1)*                                     | 0.048  | 0.061 | 0.435 | 0.636 | 0.010  | 0.063 | 0.872 | 0.944 | -0.153 | 0.135 | 0.259 | 0.848 |
| sphingomyelin (d18:2/24:1, d18:1/24:2)*                         | -0.019 | 0.066 | 0.776 | 0.881 | -0.070 | 0.068 | 0.305 | 0.544 | -0.241 | 0.145 | 0.098 | 0.819 |
| sphingomyelin (d18:2/24:2)*                                     | -0.051 | 0.046 | 0.265 | 0.485 | -0.065 | 0.048 | 0.174 | 0.388 | -0.082 | 0.102 | 0.424 | 0.893 |
| sphingosine                                                     | 0.182  | 0.077 | 0.020 | 0.092 | 0.199  | 0.080 | 0.014 | 0.071 | 0.146  | 0.172 | 0.396 | 0.893 |
| sphingosine 1-phosphate                                         | -0.081 | 0.082 | 0.321 | 0.542 | -0.058 | 0.085 | 0.500 | 0.712 | 0.078  | 0.182 | 0.667 | 0.980 |
| stachydrine                                                     | 0.035  | 0.081 | 0.668 | 0.807 | -0.039 | 0.085 | 0.642 | 0.795 | -0.326 | 0.179 | 0.071 | 0.819 |
| stearamide (18:0)                                               | 0.000  | 0.085 | 0.998 | 0.999 | 0.006  | 0.088 | 0.946 | 0.969 | 0.027  | 0.189 | 0.889 | 0.992 |
| stearate (18:0)                                                 | 0.021  | 0.082 | 0.796 | 0.891 | 0.014  | 0.085 | 0.868 | 0.943 | -0.024 | 0.182 | 0.894 | 0.992 |
| stearidonate (18:4n3)                                           | 0.065  | 0.069 | 0.347 | 0.563 | 0.059  | 0.072 | 0.413 | 0.641 | -0.004 | 0.153 | 0.982 | 0.997 |
| stearoyl sphingomyelin (d18:1/18:0)                             | 0.154  | 0.075 | 0.040 | 0.149 | 0.155  | 0.078 | 0.048 | 0.173 | 0.059  | 0.167 | 0.725 | 0.980 |
| stearoylcarnitine (C18)                                         | 0.049  | 0.075 | 0.511 | 0.701 | 0.132  | 0.077 | 0.089 | 0.256 | 0.398  | 0.164 | 0.017 | 0.738 |
| stearoylcholine*                                                | -0.087 | 0.085 | 0.309 | 0.530 | -0.118 | 0.088 | 0.181 | 0.400 | -0.175 | 0.187 | 0.351 | 0.885 |
| suberate (C8-DC)                                                | 0.006  | 0.087 | 0.944 | 0.973 | -0.055 | 0.090 | 0.539 | 0.743 | -0.275 | 0.190 | 0.151 | 0.819 |
| suberoylcarnitine (C8-DC)                                       | 0.182  | 0.114 | 0.114 | 0.296 | 0.145  | 0.115 | 0.212 | 0.435 | -0.082 | 0.249 | 0.744 | 0.982 |
| succinate                                                       | -0.044 | 0.082 | 0.595 | 0.764 | -0.019 | 0.086 | 0.826 | 0.922 | 0.098  | 0.184 | 0.595 | 0.961 |
| succinimide                                                     | -0.062 | 0.085 | 0.471 | 0.671 | -0.108 | 0.088 | 0.222 | 0.446 | -0.229 | 0.186 | 0.218 | 0.844 |
| succinylcarnitine (C4)                                          | 0.192  | 0.084 | 0.024 | 0.104 | 0.235  | 0.087 | 0.008 | 0.046 | 0.266  | 0.187 | 0.156 | 0.819 |
| sucrose                                                         | -0.094 | 0.101 | 0.355 | 0.572 | -0.117 | 0.109 | 0.286 | 0.521 | -0.126 | 0.235 | 0.593 | 0.961 |
| sulfate*                                                        | 0.219  | 0.086 | 0.012 | 0.064 | 0.160  | 0.091 | 0.080 | 0.236 | -0.190 | 0.192 | 0.325 | 0.877 |
| syringol sulfate                                                | 0.312  | 0.202 | 0.138 | 0.334 | 0.300  | 0.225 | 0.197 | 0.420 | -0.022 | 0.495 | 0.964 | 0.994 |
| tartarate                                                       | -0.152 | 0.091 | 0.095 | 0.264 | -0.167 | 0.094 | 0.079 | 0.235 | -0.123 | 0.202 | 0.544 | 0.947 |
| tartronate (hydroxymalonnate)                                   | -0.109 | 0.081 | 0.177 | 0.383 | -0.154 | 0.084 | 0.067 | 0.209 | -0.245 | 0.179 | 0.172 | 0.831 |
| taurine                                                         | 0.058  | 0.085 | 0.498 | 0.691 | -0.014 | 0.089 | 0.874 | 0.944 | -0.308 | 0.189 | 0.106 | 0.819 |
| taurochenodeoxycholate                                          | 0.084  | 0.081 | 0.300 | 0.522 | 0.083  | 0.084 | 0.324 | 0.566 | 0.027  | 0.177 | 0.877 | 0.992 |

|                                         |        |       |       |       |        |       |       |       |        |       |       |       |
|-----------------------------------------|--------|-------|-------|-------|--------|-------|-------|-------|--------|-------|-------|-------|
| taurochenodeoxycholic acid 3-sulfate    | 0.140  | 0.098 | 0.158 | 0.355 | 0.097  | 0.102 | 0.342 | 0.581 | -0.140 | 0.219 | 0.523 | 0.942 |
| taurocholate                            | 0.025  | 0.096 | 0.796 | 0.891 | -0.019 | 0.100 | 0.851 | 0.936 | -0.206 | 0.222 | 0.354 | 0.885 |
| taurocholate sulfate*                   | 0.138  | 0.084 | 0.103 | 0.278 | 0.153  | 0.088 | 0.083 | 0.245 | 0.118  | 0.187 | 0.530 | 0.942 |
| taurodeoxycholate                       | 0.096  | 0.099 | 0.335 | 0.554 | 0.086  | 0.107 | 0.419 | 0.644 | -0.015 | 0.220 | 0.945 | 0.993 |
| taurodeoxycholic acid 3-sulfate         | -0.049 | 0.160 | 0.759 | 0.873 | -0.115 | 0.165 | 0.486 | 0.701 | -0.292 | 0.335 | 0.387 | 0.889 |
| tauroolithocholate 3-sulfate            | 0.038  | 0.095 | 0.692 | 0.821 | 0.020  | 0.102 | 0.847 | 0.935 | -0.073 | 0.218 | 0.738 | 0.981 |
| tauroursodeoxycholate                   | -0.275 | 0.145 | 0.061 | 0.199 | -0.374 | 0.149 | 0.015 | 0.074 | -0.467 | 0.287 | 0.109 | 0.819 |
| tetradecadienedioate (C14:2-DC)*        | -0.119 | 0.076 | 0.120 | 0.303 | -0.087 | 0.080 | 0.277 | 0.511 | 0.104  | 0.170 | 0.543 | 0.947 |
| tetradecadienoate (14:2)*               | -0.118 | 0.081 | 0.148 | 0.344 | -0.108 | 0.085 | 0.204 | 0.428 | 0.003  | 0.181 | 0.986 | 0.998 |
| tetradecanedioate (C14)                 | -0.038 | 0.074 | 0.606 | 0.772 | -0.024 | 0.077 | 0.752 | 0.875 | 0.049  | 0.165 | 0.767 | 0.982 |
| theanine                                | 0.193  | 0.148 | 0.200 | 0.409 | 0.119  | 0.163 | 0.470 | 0.686 | -0.408 | 0.383 | 0.294 | 0.873 |
| theobromine                             | 0.157  | 0.108 | 0.151 | 0.346 | 0.154  | 0.113 | 0.179 | 0.398 | 0.025  | 0.274 | 0.926 | 0.993 |
| theophylline                            | 0.213  | 0.121 | 0.084 | 0.241 | 0.255  | 0.126 | 0.046 | 0.168 | 0.304  | 0.303 | 0.319 | 0.875 |
| thioprolin                              | 0.132  | 0.079 | 0.096 | 0.264 | 0.176  | 0.082 | 0.033 | 0.132 | 0.246  | 0.175 | 0.161 | 0.819 |
| threonate                               | -0.040 | 0.082 | 0.628 | 0.783 | -0.092 | 0.086 | 0.285 | 0.521 | -0.251 | 0.183 | 0.172 | 0.831 |
| threonine                               | -0.032 | 0.084 | 0.701 | 0.831 | -0.032 | 0.088 | 0.713 | 0.847 | -0.012 | 0.188 | 0.950 | 0.993 |
| thymol sulfate                          | 0.111  | 0.103 | 0.281 | 0.503 | 0.122  | 0.105 | 0.249 | 0.479 | 0.104  | 0.251 | 0.681 | 0.980 |
| thyroxine                               | 0.050  | 0.081 | 0.537 | 0.716 | 0.009  | 0.084 | 0.917 | 0.959 | -0.170 | 0.180 | 0.346 | 0.885 |
| tiglyl carnitine (C5)                   | 0.149  | 0.082 | 0.071 | 0.214 | 0.181  | 0.085 | 0.034 | 0.135 | 0.205  | 0.182 | 0.261 | 0.848 |
| trans-urocanate                         | -0.053 | 0.083 | 0.521 | 0.708 | -0.044 | 0.089 | 0.625 | 0.782 | 0.035  | 0.195 | 0.858 | 0.988 |
| tricosanoyl sphingomyelin (d18:1/23:0)* | 0.130  | 0.055 | 0.019 | 0.090 | 0.126  | 0.057 | 0.029 | 0.119 | 0.031  | 0.122 | 0.802 | 0.988 |
| tridecenedioate (C13:1-DC)*             | -0.043 | 0.075 | 0.567 | 0.742 | -0.042 | 0.078 | 0.591 | 0.765 | -0.011 | 0.166 | 0.947 | 0.993 |
| trigonelline (N'-methylnicotinate)      | 0.003  | 0.083 | 0.968 | 0.988 | 0.036  | 0.086 | 0.675 | 0.827 | 0.151  | 0.184 | 0.414 | 0.893 |
| trimethylamine N-oxide                  | 0.064  | 0.074 | 0.389 | 0.600 | 0.117  | 0.076 | 0.129 | 0.324 | 0.265  | 0.163 | 0.106 | 0.819 |
| tryptophan                              | 0.028  | 0.103 | 0.783 | 0.883 | 0.062  | 0.107 | 0.565 | 0.755 | 0.163  | 0.229 | 0.479 | 0.902 |
| tryptophan betaine                      | 0.015  | 0.075 | 0.843 | 0.920 | -0.074 | 0.078 | 0.346 | 0.585 | -0.398 | 0.164 | 0.016 | 0.738 |
| tyramine O-sulfate                      | 0.171  | 0.086 | 0.048 | 0.167 | 0.149  | 0.091 | 0.102 | 0.281 | -0.047 | 0.194 | 0.811 | 0.988 |
| umbelliferone sulfate                   | 0.329  | 0.138 | 0.021 | 0.095 | 0.288  | 0.155 | 0.069 | 0.212 | -0.238 | 0.368 | 0.521 | 0.942 |
| undecanedioate (C11-DC)                 | 0.024  | 0.072 | 0.736 | 0.855 | -0.030 | 0.075 | 0.686 | 0.832 | -0.240 | 0.160 | 0.134 | 0.819 |
| uracil                                  | 0.160  | 0.087 | 0.069 | 0.212 | 0.171  | 0.092 | 0.065 | 0.207 | 0.101  | 0.193 | 0.603 | 0.963 |
| urea                                    | 0.193  | 0.088 | 0.030 | 0.124 | 0.172  | 0.092 | 0.063 | 0.205 | -0.023 | 0.197 | 0.906 | 0.992 |
| uridine                                 | 0.023  | 0.082 | 0.779 | 0.881 | 0.043  | 0.085 | 0.619 | 0.778 | 0.098  | 0.183 | 0.594 | 0.961 |
| ursodeoxycholate                        | -0.150 | 0.082 | 0.069 | 0.212 | -0.130 | 0.085 | 0.130 | 0.325 | 0.038  | 0.183 | 0.836 | 0.988 |

|                         |        |       |       |       |        |       |       |       |        |       |       |       |
|-------------------------|--------|-------|-------|-------|--------|-------|-------|-------|--------|-------|-------|-------|
| valerate (5:0)          | -0.096 | 0.076 | 0.206 | 0.417 | -0.124 | 0.079 | 0.117 | 0.303 | -0.162 | 0.169 | 0.338 | 0.883 |
| valylleucine            | -0.319 | 0.148 | 0.034 | 0.133 | -0.223 | 0.162 | 0.173 | 0.388 | 0.248  | 0.303 | 0.415 | 0.893 |
| vanillactate            | -0.031 | 0.090 | 0.730 | 0.854 | 0.008  | 0.094 | 0.936 | 0.965 | 0.163  | 0.200 | 0.415 | 0.893 |
| vanillylmandelate (VMA) | -0.021 | 0.092 | 0.824 | 0.912 | -0.009 | 0.096 | 0.928 | 0.962 | 0.046  | 0.205 | 0.822 | 0.988 |
| X - 07765               | 0.051  | 0.088 | 0.566 | 0.742 | 0.052  | 0.093 | 0.578 | 0.761 | 0.021  | 0.204 | 0.919 | 0.992 |
| X - 09789               | -0.071 | 0.081 | 0.386 | 0.598 | -0.042 | 0.085 | 0.619 | 0.778 | 0.104  | 0.181 | 0.566 | 0.947 |
| X - 10458               | 0.177  | 0.088 | 0.045 | 0.160 | 0.245  | 0.091 | 0.008 | 0.048 | 0.367  | 0.195 | 0.062 | 0.819 |
| X - 11261               | 0.184  | 0.069 | 0.009 | 0.050 | 0.135  | 0.073 | 0.065 | 0.207 | -0.153 | 0.154 | 0.321 | 0.875 |
| X - 11308               | -0.094 | 0.067 | 0.158 | 0.355 | -0.128 | 0.069 | 0.066 | 0.208 | -0.187 | 0.148 | 0.208 | 0.841 |
| X - 11315               | -0.144 | 0.088 | 0.103 | 0.277 | -0.140 | 0.092 | 0.130 | 0.325 | -0.030 | 0.198 | 0.880 | 0.992 |
| X - 11372               | -0.101 | 0.071 | 0.159 | 0.356 | -0.125 | 0.074 | 0.093 | 0.266 | -0.147 | 0.158 | 0.355 | 0.886 |
| X - 11378               | -0.082 | 0.070 | 0.243 | 0.462 | -0.111 | 0.073 | 0.130 | 0.325 | -0.161 | 0.156 | 0.305 | 0.873 |
| X - 11381               | -0.092 | 0.097 | 0.345 | 0.560 | -0.039 | 0.104 | 0.709 | 0.845 | 0.233  | 0.226 | 0.306 | 0.873 |
| X - 11407               | -0.153 | 0.075 | 0.044 | 0.156 | -0.128 | 0.079 | 0.105 | 0.285 | 0.056  | 0.168 | 0.740 | 0.981 |
| X - 11441               | -0.202 | 0.085 | 0.018 | 0.088 | -0.206 | 0.089 | 0.021 | 0.096 | -0.091 | 0.190 | 0.631 | 0.974 |
| X - 11444               | -0.085 | 0.085 | 0.323 | 0.542 | -0.076 | 0.089 | 0.394 | 0.627 | 0.010  | 0.193 | 0.961 | 0.994 |
| X - 11470               | -0.169 | 0.089 | 0.060 | 0.196 | -0.122 | 0.092 | 0.185 | 0.405 | 0.133  | 0.193 | 0.491 | 0.911 |
| X - 11478               | 0.021  | 0.073 | 0.776 | 0.881 | -0.020 | 0.076 | 0.796 | 0.903 | -0.174 | 0.161 | 0.280 | 0.869 |
| X - 11491               | 0.086  | 0.093 | 0.359 | 0.574 | 0.131  | 0.097 | 0.180 | 0.400 | 0.234  | 0.208 | 0.262 | 0.848 |
| X - 11522               | -0.201 | 0.081 | 0.014 | 0.070 | -0.238 | 0.084 | 0.005 | 0.032 | -0.240 | 0.179 | 0.183 | 0.839 |
| X - 11530               | -0.206 | 0.079 | 0.010 | 0.056 | -0.243 | 0.082 | 0.003 | 0.024 | -0.246 | 0.175 | 0.162 | 0.819 |
| X - 11632               | 0.179  | 0.086 | 0.039 | 0.145 | 0.178  | 0.091 | 0.052 | 0.181 | 0.050  | 0.196 | 0.798 | 0.988 |
| X - 11787               | 0.100  | 0.073 | 0.172 | 0.376 | 0.161  | 0.076 | 0.035 | 0.138 | 0.312  | 0.161 | 0.055 | 0.819 |
| X - 11795               | -0.040 | 0.072 | 0.579 | 0.751 | -0.057 | 0.075 | 0.447 | 0.666 | -0.093 | 0.161 | 0.566 | 0.947 |
| X - 11843               | -0.104 | 0.091 | 0.254 | 0.472 | -0.039 | 0.095 | 0.681 | 0.830 | 0.265  | 0.203 | 0.194 | 0.839 |
| X - 11847               | 0.157  | 0.073 | 0.033 | 0.131 | 0.181  | 0.076 | 0.019 | 0.088 | 0.163  | 0.163 | 0.319 | 0.875 |
| X - 11849               | 0.133  | 0.071 | 0.061 | 0.199 | 0.165  | 0.074 | 0.027 | 0.116 | 0.190  | 0.160 | 0.237 | 0.845 |
| X - 11850               | -0.197 | 0.093 | 0.036 | 0.136 | -0.138 | 0.101 | 0.173 | 0.388 | 0.222  | 0.213 | 0.298 | 0.873 |
| X - 11852               | -0.003 | 0.109 | 0.981 | 0.990 | -0.010 | 0.116 | 0.930 | 0.962 | -0.042 | 0.272 | 0.878 | 0.992 |
| X - 11858               | 0.145  | 0.084 | 0.086 | 0.245 | 0.156  | 0.090 | 0.085 | 0.249 | 0.084  | 0.189 | 0.657 | 0.980 |
| X - 11861               | 0.069  | 0.115 | 0.549 | 0.726 | 0.124  | 0.119 | 0.300 | 0.540 | 0.311  | 0.273 | 0.259 | 0.848 |
| X - 11880               | -0.040 | 0.065 | 0.532 | 0.713 | -0.048 | 0.067 | 0.472 | 0.686 | -0.051 | 0.144 | 0.722 | 0.980 |
| X - 12007               | 0.117  | 0.089 | 0.190 | 0.395 | 0.091  | 0.094 | 0.334 | 0.574 | -0.078 | 0.197 | 0.694 | 0.980 |



|                                                   |        |       |       |       |        |       |       |       |        |       |       |       |
|---------------------------------------------------|--------|-------|-------|-------|--------|-------|-------|-------|--------|-------|-------|-------|
| X - 12013                                         | -0.088 | 0.111 | 0.428 | 0.631 | -0.085 | 0.117 | 0.467 | 0.686 | -0.016 | 0.245 | 0.949 | 0.993 |
| X - 12015                                         | 0.166  | 0.105 | 0.115 | 0.298 | 0.081  | 0.108 | 0.456 | 0.676 | -0.321 | 0.229 | 0.163 | 0.819 |
| X - 12026                                         | 0.006  | 0.085 | 0.945 | 0.973 | 0.068  | 0.088 | 0.440 | 0.662 | 0.287  | 0.188 | 0.129 | 0.819 |
| X - 12093 - retired for N2-acetyl,N6-methyllysine | -0.128 | 0.102 | 0.211 | 0.424 | -0.147 | 0.106 | 0.169 | 0.383 | -0.141 | 0.247 | 0.568 | 0.947 |
| X - 12100                                         | 0.019  | 0.089 | 0.828 | 0.914 | 0.048  | 0.092 | 0.600 | 0.769 | 0.140  | 0.197 | 0.479 | 0.902 |
| X - 12101                                         | 0.107  | 0.077 | 0.165 | 0.364 | 0.091  | 0.080 | 0.259 | 0.490 | -0.035 | 0.171 | 0.837 | 0.988 |
| X - 12104                                         | 0.019  | 0.102 | 0.853 | 0.924 | 0.095  | 0.108 | 0.382 | 0.620 | 0.388  | 0.242 | 0.111 | 0.819 |
| X - 12112                                         | -0.013 | 0.084 | 0.877 | 0.932 | 0.014  | 0.088 | 0.874 | 0.944 | 0.115  | 0.185 | 0.536 | 0.943 |
| X - 12117                                         | 0.327  | 0.136 | 0.019 | 0.090 | 0.336  | 0.135 | 0.015 | 0.077 | 0.222  | 0.296 | 0.456 | 0.902 |
| X - 12127                                         | 0.009  | 0.107 | 0.935 | 0.969 | 0.062  | 0.110 | 0.571 | 0.758 | 0.230  | 0.226 | 0.310 | 0.873 |
| X - 12193                                         | 0.109  | 0.086 | 0.206 | 0.417 | 0.116  | 0.090 | 0.200 | 0.423 | 0.069  | 0.204 | 0.738 | 0.981 |
| X - 12206                                         | 0.014  | 0.087 | 0.873 | 0.931 | 0.029  | 0.091 | 0.747 | 0.871 | 0.075  | 0.195 | 0.700 | 0.980 |
| X - 12212                                         | 0.002  | 0.080 | 0.984 | 0.990 | 0.048  | 0.085 | 0.579 | 0.761 | 0.230  | 0.191 | 0.230 | 0.844 |
| X - 12216                                         | -0.105 | 0.092 | 0.257 | 0.476 | -0.048 | 0.095 | 0.615 | 0.777 | 0.210  | 0.201 | 0.296 | 0.873 |
| X - 12221                                         | -0.151 | 0.115 | 0.192 | 0.399 | -0.124 | 0.115 | 0.285 | 0.521 | 0.044  | 0.247 | 0.858 | 0.988 |
| X - 12230                                         | -0.030 | 0.084 | 0.719 | 0.846 | -0.036 | 0.088 | 0.688 | 0.833 | -0.035 | 0.194 | 0.859 | 0.988 |
| X - 12261                                         | 0.338  | 0.470 | 0.489 | 0.683 | 0.060  | 0.679 | 0.932 | 0.962 | -1.910 | 1.457 | 0.223 | 0.844 |
| X - 12283                                         | 0.099  | 0.099 | 0.318 | 0.541 | 0.166  | 0.102 | 0.105 | 0.285 | 0.299  | 0.200 | 0.137 | 0.819 |
| X - 12306                                         | -0.023 | 0.108 | 0.831 | 0.916 | -0.032 | 0.116 | 0.787 | 0.900 | -0.048 | 0.268 | 0.857 | 0.988 |
| X - 12329                                         | 0.191  | 0.111 | 0.088 | 0.250 | 0.126  | 0.114 | 0.272 | 0.505 | -0.202 | 0.239 | 0.400 | 0.893 |
| X - 12407                                         | -0.106 | 0.173 | 0.544 | 0.722 | -0.372 | 0.191 | 0.059 | 0.197 | -0.906 | 0.337 | 0.011 | 0.738 |
| X - 12410                                         | 0.171  | 0.095 | 0.074 | 0.218 | 0.117  | 0.101 | 0.247 | 0.477 | -0.251 | 0.233 | 0.284 | 0.869 |
| X - 12462                                         | 0.049  | 0.074 | 0.510 | 0.701 | 0.050  | 0.077 | 0.523 | 0.732 | 0.020  | 0.166 | 0.904 | 0.992 |
| X - 12472                                         | 0.080  | 0.083 | 0.336 | 0.554 | 0.059  | 0.085 | 0.486 | 0.701 | -0.050 | 0.173 | 0.774 | 0.984 |
| X - 12543                                         | -0.177 | 0.170 | 0.305 | 0.527 | -0.190 | 0.160 | 0.241 | 0.473 | -0.221 | 0.388 | 0.572 | 0.947 |
| X - 12544                                         | -0.112 | 0.143 | 0.435 | 0.636 | -0.141 | 0.152 | 0.355 | 0.591 | -0.141 | 0.286 | 0.623 | 0.972 |
| X - 12707                                         | -0.159 | 0.080 | 0.048 | 0.167 | -0.120 | 0.084 | 0.155 | 0.365 | 0.121  | 0.178 | 0.497 | 0.916 |
| X - 12718                                         | 0.214  | 0.117 | 0.070 | 0.212 | 0.129  | 0.119 | 0.280 | 0.515 | -0.302 | 0.258 | 0.244 | 0.847 |
| X - 12729                                         | 0.155  | 0.082 | 0.062 | 0.199 | 0.141  | 0.086 | 0.102 | 0.281 | -0.005 | 0.183 | 0.976 | 0.995 |
| X - 12730                                         | -0.069 | 0.119 | 0.562 | 0.740 | -0.007 | 0.120 | 0.952 | 0.971 | 0.262  | 0.263 | 0.321 | 0.875 |
| X - 12739                                         | -0.011 | 0.096 | 0.912 | 0.953 | 0.058  | 0.100 | 0.565 | 0.755 | 0.305  | 0.212 | 0.154 | 0.819 |
| X - 12740                                         | -0.063 | 0.108 | 0.563 | 0.740 | -0.026 | 0.116 | 0.824 | 0.922 | 0.193  | 0.272 | 0.480 | 0.902 |
| X - 12753                                         | -0.037 | 0.113 | 0.743 | 0.860 | -0.057 | 0.114 | 0.622 | 0.780 | -0.095 | 0.230 | 0.679 | 0.980 |

|           |        |       |       |       |        |       |       |       |        |       |       |       |
|-----------|--------|-------|-------|-------|--------|-------|-------|-------|--------|-------|-------|-------|
| X - 12812 | 0.048  | 0.120 | 0.689 | 0.819 | -0.031 | 0.122 | 0.802 | 0.907 | -0.308 | 0.249 | 0.219 | 0.844 |
| X - 12822 | 0.187  | 0.091 | 0.042 | 0.151 | 0.190  | 0.095 | 0.047 | 0.169 | 0.082  | 0.204 | 0.687 | 0.980 |
| X - 12844 | 0.018  | 0.082 | 0.827 | 0.914 | 0.046  | 0.086 | 0.598 | 0.767 | 0.133  | 0.185 | 0.474 | 0.902 |
| X - 12846 | 0.196  | 0.081 | 0.017 | 0.081 | 0.191  | 0.084 | 0.025 | 0.109 | 0.050  | 0.179 | 0.782 | 0.988 |
| X - 12847 | -0.172 | 0.120 | 0.156 | 0.353 | -0.104 | 0.125 | 0.408 | 0.635 | 0.280  | 0.280 | 0.320 | 0.875 |
| X - 12849 | 0.196  | 0.137 | 0.157 | 0.353 | 0.178  | 0.141 | 0.211 | 0.435 | -0.029 | 0.341 | 0.933 | 0.993 |
| X - 12851 | -0.193 | 0.137 | 0.162 | 0.358 | -0.115 | 0.148 | 0.441 | 0.662 | 0.216  | 0.277 | 0.439 | 0.900 |
| X - 12879 | 0.102  | 0.095 | 0.282 | 0.504 | 0.057  | 0.099 | 0.566 | 0.756 | -0.171 | 0.212 | 0.422 | 0.893 |
| X - 12906 | 0.104  | 0.085 | 0.221 | 0.437 | 0.099  | 0.090 | 0.271 | 0.505 | 0.007  | 0.194 | 0.972 | 0.995 |
| X - 13431 | 0.174  | 0.080 | 0.032 | 0.129 | 0.160  | 0.084 | 0.058 | 0.196 | 0.000  | 0.179 | 0.998 | 0.999 |
| X - 13507 | 0.074  | 0.101 | 0.466 | 0.666 | 0.015  | 0.108 | 0.892 | 0.949 | -0.270 | 0.237 | 0.257 | 0.848 |
| X - 13553 | -0.040 | 0.073 | 0.585 | 0.755 | 0.009  | 0.076 | 0.905 | 0.955 | 0.209  | 0.162 | 0.199 | 0.841 |
| X - 13658 | 0.039  | 0.093 | 0.672 | 0.809 | -0.085 | 0.098 | 0.384 | 0.620 | -0.560 | 0.204 | 0.007 | 0.738 |
| X - 13684 | 0.187  | 0.083 | 0.026 | 0.111 | 0.175  | 0.087 | 0.046 | 0.168 | 0.012  | 0.186 | 0.947 | 0.993 |
| X - 13695 | 0.133  | 0.087 | 0.128 | 0.319 | 0.171  | 0.089 | 0.057 | 0.193 | 0.225  | 0.189 | 0.235 | 0.844 |
| X - 13729 | -0.040 | 0.089 | 0.652 | 0.798 | -0.051 | 0.091 | 0.576 | 0.761 | -0.070 | 0.201 | 0.729 | 0.980 |
| X - 13835 | 0.074  | 0.112 | 0.508 | 0.700 | -0.038 | 0.118 | 0.747 | 0.871 | -0.431 | 0.235 | 0.070 | 0.819 |
| X - 13866 | 0.133  | 0.074 | 0.073 | 0.218 | 0.111  | 0.077 | 0.153 | 0.362 | -0.053 | 0.165 | 0.748 | 0.982 |
| X - 14056 | 0.145  | 0.083 | 0.081 | 0.236 | 0.179  | 0.086 | 0.038 | 0.144 | 0.209  | 0.184 | 0.256 | 0.848 |
| X - 14662 | 0.004  | 0.081 | 0.959 | 0.982 | -0.010 | 0.085 | 0.906 | 0.955 | -0.067 | 0.187 | 0.721 | 0.980 |
| X - 14939 | 0.107  | 0.073 | 0.143 | 0.338 | 0.084  | 0.076 | 0.269 | 0.503 | -0.065 | 0.162 | 0.690 | 0.980 |
| X - 15220 | -0.149 | 0.124 | 0.234 | 0.450 | -0.145 | 0.136 | 0.292 | 0.529 | 0.017  | 0.322 | 0.959 | 0.994 |
| X - 15245 | 0.026  | 0.095 | 0.783 | 0.883 | 0.091  | 0.095 | 0.339 | 0.579 | 0.350  | 0.216 | 0.108 | 0.819 |
| X - 15461 | 0.213  | 0.082 | 0.010 | 0.055 | 0.213  | 0.085 | 0.013 | 0.068 | 0.080  | 0.182 | 0.661 | 0.980 |
| X - 15469 | -0.034 | 0.083 | 0.685 | 0.816 | -0.006 | 0.087 | 0.941 | 0.968 | 0.113  | 0.185 | 0.544 | 0.947 |
| X - 15486 | 0.175  | 0.067 | 0.010 | 0.054 | 0.114  | 0.071 | 0.110 | 0.291 | -0.214 | 0.148 | 0.150 | 0.819 |
| X - 15492 | 0.149  | 0.072 | 0.041 | 0.149 | 0.166  | 0.075 | 0.028 | 0.118 | 0.133  | 0.161 | 0.410 | 0.893 |
| X - 15503 | 0.229  | 0.089 | 0.011 | 0.059 | 0.256  | 0.092 | 0.006 | 0.038 | 0.207  | 0.197 | 0.295 | 0.873 |
| X - 15664 | 0.020  | 0.104 | 0.845 | 0.921 | -0.024 | 0.109 | 0.825 | 0.922 | -0.180 | 0.224 | 0.423 | 0.893 |
| X - 15666 | 0.020  | 0.081 | 0.808 | 0.900 | -0.046 | 0.084 | 0.587 | 0.765 | -0.292 | 0.179 | 0.105 | 0.819 |
| X - 15728 | -0.126 | 0.107 | 0.242 | 0.461 | -0.130 | 0.113 | 0.253 | 0.483 | -0.056 | 0.250 | 0.824 | 0.988 |
| X - 16087 | 0.101  | 0.090 | 0.262 | 0.483 | 0.052  | 0.094 | 0.584 | 0.765 | -0.225 | 0.213 | 0.294 | 0.873 |
| X - 16124 | 0.113  | 0.128 | 0.379 | 0.594 | 0.229  | 0.133 | 0.087 | 0.253 | 0.662  | 0.306 | 0.033 | 0.738 |

|           |        |       |       |       |        |       |       |       |        |       |       |       |
|-----------|--------|-------|-------|-------|--------|-------|-------|-------|--------|-------|-------|-------|
| X - 16397 | 0.130  | 0.089 | 0.148 | 0.344 | 0.144  | 0.091 | 0.117 | 0.303 | 0.122  | 0.197 | 0.535 | 0.943 |
| X - 16570 | 0.039  | 0.084 | 0.646 | 0.793 | -0.047 | 0.087 | 0.590 | 0.765 | -0.385 | 0.187 | 0.041 | 0.783 |
| X - 16576 | -0.060 | 0.145 | 0.681 | 0.814 | 0.067  | 0.156 | 0.669 | 0.820 | 0.635  | 0.345 | 0.071 | 0.819 |
| X - 16580 | 0.104  | 0.083 | 0.211 | 0.424 | 0.088  | 0.086 | 0.311 | 0.551 | -0.036 | 0.184 | 0.847 | 0.988 |
| X - 16649 | 0.031  | 0.102 | 0.764 | 0.877 | -0.002 | 0.106 | 0.985 | 0.989 | -0.146 | 0.233 | 0.533 | 0.943 |
| X - 16654 | 0.119  | 0.113 | 0.294 | 0.517 | 0.193  | 0.120 | 0.112 | 0.294 | 0.379  | 0.263 | 0.153 | 0.819 |
| X - 16932 | 0.029  | 0.114 | 0.804 | 0.897 | -0.085 | 0.117 | 0.471 | 0.686 | -0.425 | 0.228 | 0.065 | 0.819 |
| X - 16935 | -0.100 | 0.067 | 0.140 | 0.336 | -0.132 | 0.070 | 0.060 | 0.200 | -0.184 | 0.150 | 0.222 | 0.844 |
| X - 16938 | -0.006 | 0.082 | 0.942 | 0.972 | -0.011 | 0.085 | 0.895 | 0.950 | -0.027 | 0.183 | 0.885 | 0.992 |
| X - 16944 | 0.123  | 0.073 | 0.094 | 0.261 | 0.102  | 0.077 | 0.183 | 0.402 | -0.052 | 0.163 | 0.753 | 0.982 |
| X - 16964 | 0.095  | 0.082 | 0.248 | 0.468 | 0.122  | 0.085 | 0.152 | 0.361 | 0.160  | 0.182 | 0.380 | 0.888 |
| X - 17010 | -0.074 | 0.074 | 0.320 | 0.542 | -0.085 | 0.077 | 0.273 | 0.505 | -0.077 | 0.165 | 0.644 | 0.980 |
| X - 17137 | 0.008  | 0.103 | 0.942 | 0.972 | -0.045 | 0.109 | 0.682 | 0.830 | -0.217 | 0.224 | 0.333 | 0.880 |
| X - 17145 | -0.015 | 0.080 | 0.847 | 0.922 | -0.032 | 0.084 | 0.706 | 0.845 | -0.079 | 0.179 | 0.660 | 0.980 |
| X - 17162 | -0.088 | 0.123 | 0.477 | 0.674 | -0.034 | 0.131 | 0.796 | 0.903 | 0.219  | 0.278 | 0.434 | 0.900 |
| X - 17185 | 0.027  | 0.078 | 0.725 | 0.851 | -0.013 | 0.081 | 0.876 | 0.944 | -0.184 | 0.177 | 0.301 | 0.873 |
| X - 17269 | 0.134  | 0.086 | 0.122 | 0.307 | 0.139  | 0.091 | 0.130 | 0.325 | 0.062  | 0.193 | 0.749 | 0.982 |
| X - 17325 | -0.238 | 0.106 | 0.028 | 0.118 | -0.145 | 0.116 | 0.214 | 0.438 | 0.412  | 0.252 | 0.106 | 0.819 |
| X - 17335 | 0.076  | 0.084 | 0.367 | 0.584 | 0.088  | 0.088 | 0.318 | 0.559 | 0.081  | 0.188 | 0.668 | 0.980 |
| X - 17337 | 0.200  | 0.077 | 0.010 | 0.055 | 0.193  | 0.080 | 0.017 | 0.082 | 0.042  | 0.171 | 0.809 | 0.988 |
| X - 17351 | 0.110  | 0.096 | 0.253 | 0.472 | 0.191  | 0.098 | 0.053 | 0.184 | 0.389  | 0.201 | 0.055 | 0.819 |
| X - 17357 | 0.139  | 0.092 | 0.132 | 0.327 | 0.232  | 0.094 | 0.015 | 0.075 | 0.467  | 0.199 | 0.020 | 0.738 |
| X - 17359 | 0.211  | 0.085 | 0.014 | 0.073 | 0.238  | 0.088 | 0.007 | 0.044 | 0.210  | 0.189 | 0.268 | 0.854 |
| X - 17365 | 0.074  | 0.167 | 0.662 | 0.805 | 0.064  | 0.173 | 0.712 | 0.847 | -0.026 | 0.414 | 0.950 | 0.993 |
| X - 17367 | -0.302 | 0.124 | 0.017 | 0.083 | -0.192 | 0.135 | 0.159 | 0.373 | 0.448  | 0.285 | 0.120 | 0.819 |
| X - 17438 | -0.179 | 0.078 | 0.023 | 0.102 | -0.216 | 0.081 | 0.009 | 0.049 | -0.232 | 0.174 | 0.183 | 0.839 |
| X - 17612 | 0.161  | 0.107 | 0.135 | 0.330 | 0.154  | 0.116 | 0.186 | 0.405 | -0.021 | 0.274 | 0.939 | 0.993 |
| X - 17653 | -0.085 | 0.067 | 0.206 | 0.417 | -0.116 | 0.069 | 0.096 | 0.271 | -0.173 | 0.148 | 0.243 | 0.847 |
| X - 17654 | -0.139 | 0.068 | 0.041 | 0.150 | -0.155 | 0.070 | 0.029 | 0.120 | -0.121 | 0.151 | 0.423 | 0.893 |
| X - 17655 | -0.112 | 0.139 | 0.424 | 0.629 | -0.037 | 0.145 | 0.801 | 0.907 | 0.308  | 0.312 | 0.327 | 0.879 |
| X - 17673 | 0.218  | 0.190 | 0.267 | 0.486 | 0.261  | 0.216 | 0.243 | 0.474 | 0.214  | 0.584 | 0.719 | 0.980 |
| X - 17676 | 0.190  | 0.087 | 0.030 | 0.124 | 0.148  | 0.091 | 0.105 | 0.285 | -0.127 | 0.196 | 0.519 | 0.941 |
| X - 17685 | 0.230  | 0.120 | 0.058 | 0.192 | 0.233  | 0.126 | 0.067 | 0.210 | 0.089  | 0.280 | 0.751 | 0.982 |

|           |        |       |       |       |        |       |       |       |        |       |       |       |
|-----------|--------|-------|-------|-------|--------|-------|-------|-------|--------|-------|-------|-------|
| X - 18249 | 0.121  | 0.061 | 0.047 | 0.164 | 0.136  | 0.063 | 0.033 | 0.132 | 0.109  | 0.135 | 0.423 | 0.893 |
| X - 18888 | 0.073  | 0.087 | 0.402 | 0.612 | 0.025  | 0.093 | 0.788 | 0.900 | -0.187 | 0.193 | 0.333 | 0.880 |
| X - 18899 | -0.036 | 0.072 | 0.616 | 0.776 | -0.031 | 0.076 | 0.682 | 0.830 | 0.011  | 0.161 | 0.944 | 0.993 |
| X - 18901 | -0.030 | 0.087 | 0.733 | 0.855 | 0.024  | 0.090 | 0.794 | 0.903 | 0.232  | 0.192 | 0.229 | 0.844 |
| X - 18913 | 0.096  | 0.079 | 0.226 | 0.443 | 0.095  | 0.082 | 0.246 | 0.477 | 0.034  | 0.175 | 0.845 | 0.988 |
| X - 18914 | 0.090  | 0.067 | 0.179 | 0.384 | 0.081  | 0.070 | 0.247 | 0.477 | -0.009 | 0.149 | 0.951 | 0.993 |
| X - 18921 | 0.027  | 0.074 | 0.715 | 0.842 | 0.016  | 0.077 | 0.834 | 0.927 | -0.040 | 0.165 | 0.809 | 0.988 |
| X - 19141 | 0.069  | 0.086 | 0.420 | 0.624 | 0.165  | 0.089 | 0.066 | 0.208 | 0.479  | 0.194 | 0.014 | 0.738 |
| X - 19183 | 0.315  | 0.351 | 0.387 | 0.598 | 0.259  | 0.425 | 0.553 | 0.749 | -0.556 | 1.099 | 0.623 | 0.972 |
| X - 19438 | 0.135  | 0.078 | 0.087 | 0.249 | 0.173  | 0.082 | 0.036 | 0.142 | 0.229  | 0.182 | 0.210 | 0.841 |
| X - 21258 | 0.156  | 0.064 | 0.016 | 0.078 | 0.227  | 0.065 | 0.001 | 0.006 | 0.384  | 0.139 | 0.007 | 0.738 |
| X - 21286 | -0.085 | 0.086 | 0.324 | 0.542 | -0.041 | 0.089 | 0.647 | 0.799 | 0.164  | 0.188 | 0.385 | 0.889 |
| X - 21295 | -0.003 | 0.099 | 0.976 | 0.990 | 0.017  | 0.102 | 0.867 | 0.943 | 0.094  | 0.223 | 0.674 | 0.980 |
| X - 21310 | -0.156 | 0.083 | 0.062 | 0.199 | -0.081 | 0.087 | 0.352 | 0.589 | 0.284  | 0.184 | 0.124 | 0.819 |
| X - 21315 | -0.582 | 0.220 | 0.029 | 0.121 | -0.593 | 0.213 | 0.024 | 0.105 | -0.430 | 0.668 | 0.540 | 0.947 |
| X - 21319 | 0.032  | 0.075 | 0.673 | 0.809 | 0.004  | 0.078 | 0.963 | 0.976 | -0.117 | 0.167 | 0.486 | 0.905 |
| X - 21339 | 0.022  | 0.049 | 0.656 | 0.803 | -0.029 | 0.052 | 0.572 | 0.758 | -0.227 | 0.109 | 0.040 | 0.773 |
| X - 21342 | 0.082  | 0.072 | 0.250 | 0.471 | 0.083  | 0.075 | 0.265 | 0.497 | 0.034  | 0.160 | 0.833 | 0.988 |
| X - 21353 | -0.014 | 0.082 | 0.867 | 0.930 | -0.009 | 0.085 | 0.915 | 0.959 | 0.016  | 0.183 | 0.931 | 0.993 |
| X - 21364 | 0.082  | 0.063 | 0.198 | 0.407 | 0.075  | 0.066 | 0.254 | 0.483 | 0.001  | 0.140 | 0.995 | 0.999 |
| X - 21410 | 0.150  | 0.086 | 0.082 | 0.239 | 0.121  | 0.090 | 0.183 | 0.402 | -0.089 | 0.196 | 0.651 | 0.980 |
| X - 21411 | 0.075  | 0.083 | 0.368 | 0.584 | 0.001  | 0.087 | 0.994 | 0.995 | -0.313 | 0.184 | 0.090 | 0.819 |
| X - 21441 | -0.055 | 0.079 | 0.487 | 0.683 | -0.097 | 0.084 | 0.247 | 0.477 | -0.204 | 0.178 | 0.251 | 0.848 |
| X - 21448 | -0.204 | 0.079 | 0.011 | 0.059 | -0.200 | 0.083 | 0.017 | 0.082 | -0.053 | 0.177 | 0.765 | 0.982 |
| X - 21467 | 0.032  | 0.079 | 0.682 | 0.814 | 0.090  | 0.082 | 0.272 | 0.505 | 0.276  | 0.175 | 0.116 | 0.819 |
| X - 21470 | 0.103  | 0.076 | 0.179 | 0.384 | 0.078  | 0.079 | 0.323 | 0.566 | -0.067 | 0.166 | 0.685 | 0.980 |
| X - 21471 | 0.055  | 0.079 | 0.486 | 0.683 | 0.108  | 0.081 | 0.187 | 0.407 | 0.260  | 0.173 | 0.135 | 0.819 |
| X - 21607 | 0.052  | 0.085 | 0.536 | 0.716 | 0.078  | 0.088 | 0.376 | 0.616 | 0.133  | 0.186 | 0.474 | 0.902 |
| X - 21661 | 0.099  | 0.091 | 0.278 | 0.501 | 0.105  | 0.100 | 0.295 | 0.533 | 0.042  | 0.208 | 0.841 | 0.988 |
| X - 21729 | 0.078  | 0.083 | 0.349 | 0.563 | 0.159  | 0.086 | 0.066 | 0.208 | 0.399  | 0.183 | 0.031 | 0.738 |
| X - 21733 | -0.118 | 0.105 | 0.264 | 0.485 | -0.136 | 0.108 | 0.210 | 0.434 | -0.131 | 0.229 | 0.570 | 0.947 |
| X - 21736 | 0.190  | 0.075 | 0.012 | 0.065 | 0.204  | 0.079 | 0.010 | 0.056 | 0.131  | 0.168 | 0.439 | 0.900 |
| X - 21785 | 0.197  | 0.077 | 0.011 | 0.059 | 0.205  | 0.080 | 0.011 | 0.061 | 0.108  | 0.171 | 0.527 | 0.942 |

|           |        |       |       |       |        |       |       |       |        |       |       |       |
|-----------|--------|-------|-------|-------|--------|-------|-------|-------|--------|-------|-------|-------|
| X - 21792 | 0.023  | 0.086 | 0.787 | 0.886 | 0.043  | 0.089 | 0.627 | 0.783 | 0.099  | 0.189 | 0.601 | 0.963 |
| X - 21796 | 0.052  | 0.076 | 0.495 | 0.688 | 0.083  | 0.079 | 0.297 | 0.537 | 0.159  | 0.170 | 0.350 | 0.885 |
| X - 21803 | -0.244 | 0.254 | 0.348 | 0.563 | -0.142 | 0.241 | 0.563 | 0.755 | 0.270  | 0.515 | 0.607 | 0.963 |
| X - 21807 | -0.029 | 0.162 | 0.861 | 0.929 | 0.016  | 0.181 | 0.931 | 0.962 | 0.209  | 0.397 | 0.601 | 0.963 |
| X - 21821 | 0.125  | 0.098 | 0.205 | 0.417 | 0.188  | 0.100 | 0.061 | 0.200 | 0.303  | 0.197 | 0.125 | 0.819 |
| X - 21834 | -0.010 | 0.091 | 0.915 | 0.953 | -0.001 | 0.096 | 0.991 | 0.993 | 0.040  | 0.215 | 0.851 | 0.988 |
| X - 21959 | -0.103 | 0.075 | 0.174 | 0.378 | -0.131 | 0.078 | 0.095 | 0.269 | -0.167 | 0.167 | 0.320 | 0.875 |
| X - 22143 | 0.214  | 0.105 | 0.043 | 0.154 | 0.143  | 0.109 | 0.191 | 0.412 | -0.236 | 0.230 | 0.307 | 0.873 |
| X - 22162 | 0.011  | 0.087 | 0.901 | 0.948 | 0.047  | 0.090 | 0.601 | 0.769 | 0.170  | 0.193 | 0.379 | 0.888 |
| X - 22519 | -0.059 | 0.080 | 0.461 | 0.660 | -0.020 | 0.083 | 0.811 | 0.914 | 0.156  | 0.177 | 0.379 | 0.888 |
| X - 22520 | 0.237  | 0.152 | 0.124 | 0.312 | 0.190  | 0.149 | 0.205 | 0.428 | -0.057 | 0.314 | 0.857 | 0.988 |
| X - 22764 | -0.105 | 0.083 | 0.209 | 0.420 | -0.101 | 0.087 | 0.246 | 0.477 | -0.020 | 0.186 | 0.916 | 0.992 |
| X - 22771 | 0.067  | 0.083 | 0.420 | 0.624 | 0.107  | 0.086 | 0.215 | 0.438 | 0.208  | 0.184 | 0.261 | 0.848 |
| X - 22776 | 0.166  | 0.086 | 0.054 | 0.184 | 0.212  | 0.089 | 0.018 | 0.088 | 0.269  | 0.192 | 0.164 | 0.819 |
| X - 22834 | -0.210 | 0.162 | 0.202 | 0.413 | -0.126 | 0.170 | 0.460 | 0.679 | 0.207  | 0.319 | 0.520 | 0.941 |
| X - 22918 | 0.257  | 0.233 | 0.289 | 0.512 | 0.292  | 0.279 | 0.313 | 0.553 | 0.116  | 0.534 | 0.831 | 0.988 |
| X - 23160 | 0.081  | 0.116 | 0.486 | 0.683 | 0.060  | 0.123 | 0.631 | 0.786 | -0.075 | 0.263 | 0.777 | 0.985 |
| X - 23196 | -0.016 | 0.080 | 0.838 | 0.920 | -0.087 | 0.083 | 0.294 | 0.532 | -0.330 | 0.176 | 0.063 | 0.819 |
| X - 23276 | -0.109 | 0.073 | 0.137 | 0.333 | -0.150 | 0.076 | 0.049 | 0.174 | -0.225 | 0.162 | 0.166 | 0.823 |
| X - 23295 | 0.047  | 0.071 | 0.511 | 0.701 | 0.007  | 0.074 | 0.929 | 0.962 | -0.169 | 0.159 | 0.291 | 0.873 |
| X - 23296 | -0.026 | 0.155 | 0.868 | 0.930 | -0.045 | 0.172 | 0.795 | 0.903 | -0.081 | 0.347 | 0.817 | 0.988 |
| X - 23297 | -0.137 | 0.083 | 0.101 | 0.276 | -0.138 | 0.087 | 0.114 | 0.298 | -0.054 | 0.183 | 0.767 | 0.982 |
| X - 23314 | -0.010 | 0.088 | 0.910 | 0.953 | -0.043 | 0.092 | 0.645 | 0.797 | -0.159 | 0.202 | 0.431 | 0.898 |
| X - 23369 | 0.116  | 0.085 | 0.174 | 0.378 | 0.142  | 0.088 | 0.110 | 0.291 | 0.160  | 0.188 | 0.398 | 0.893 |
| X - 23498 | 0.131  | 0.098 | 0.184 | 0.392 | 0.130  | 0.103 | 0.209 | 0.434 | 0.033  | 0.241 | 0.891 | 0.992 |
| X - 23507 | 0.168  | 0.102 | 0.102 | 0.276 | 0.153  | 0.101 | 0.132 | 0.328 | 0.029  | 0.215 | 0.892 | 0.992 |
| X - 23583 | -0.197 | 0.220 | 0.376 | 0.591 | -0.159 | 0.217 | 0.467 | 0.686 | 0.056  | 0.471 | 0.907 | 0.992 |
| X - 23585 | -0.102 | 0.094 | 0.282 | 0.503 | -0.170 | 0.098 | 0.084 | 0.247 | -0.369 | 0.216 | 0.090 | 0.819 |
| X - 23587 | 0.027  | 0.088 | 0.756 | 0.871 | -0.006 | 0.093 | 0.952 | 0.971 | -0.145 | 0.200 | 0.472 | 0.902 |
| X - 23636 | 0.088  | 0.084 | 0.293 | 0.517 | 0.112  | 0.087 | 0.199 | 0.423 | 0.141  | 0.187 | 0.450 | 0.902 |
| X - 23639 | -0.124 | 0.088 | 0.161 | 0.357 | -0.047 | 0.092 | 0.610 | 0.773 | 0.305  | 0.195 | 0.119 | 0.819 |
| X - 23644 | 0.121  | 0.075 | 0.106 | 0.285 | 0.107  | 0.078 | 0.169 | 0.384 | -0.017 | 0.165 | 0.919 | 0.992 |
| X - 23648 | 0.154  | 0.100 | 0.125 | 0.315 | 0.073  | 0.104 | 0.484 | 0.700 | -0.315 | 0.221 | 0.158 | 0.819 |

|           |        |       |       |       |        |       |       |       |        |       |       |       |
|-----------|--------|-------|-------|-------|--------|-------|-------|-------|--------|-------|-------|-------|
| X - 23662 | 0.119  | 0.159 | 0.455 | 0.656 | 0.066  | 0.175 | 0.710 | 0.845 | -0.185 | 0.347 | 0.596 | 0.961 |
| X - 23665 | 0.117  | 0.091 | 0.199 | 0.409 | 0.135  | 0.097 | 0.168 | 0.382 | 0.113  | 0.218 | 0.607 | 0.963 |
| X - 23666 | 0.122  | 0.090 | 0.179 | 0.384 | 0.130  | 0.092 | 0.162 | 0.377 | 0.090  | 0.206 | 0.662 | 0.980 |
| X - 23739 | 0.097  | 0.086 | 0.261 | 0.482 | 0.074  | 0.090 | 0.408 | 0.635 | -0.068 | 0.191 | 0.724 | 0.980 |
| X - 23767 | -0.063 | 0.128 | 0.622 | 0.779 | -0.070 | 0.132 | 0.596 | 0.765 | -0.059 | 0.291 | 0.840 | 0.988 |
| X - 23780 | 0.141  | 0.069 | 0.041 | 0.150 | 0.126  | 0.071 | 0.078 | 0.233 | -0.010 | 0.150 | 0.946 | 0.993 |
| X - 23782 | 0.000  | 0.073 | 0.996 | 0.998 | -0.031 | 0.076 | 0.685 | 0.832 | -0.139 | 0.163 | 0.393 | 0.891 |
| X - 23787 | 0.096  | 0.150 | 0.524 | 0.710 | 0.101  | 0.160 | 0.528 | 0.735 | 0.050  | 0.349 | 0.887 | 0.992 |
| X - 23974 | 0.008  | 0.078 | 0.915 | 0.953 | -0.034 | 0.081 | 0.680 | 0.830 | -0.186 | 0.172 | 0.282 | 0.869 |
| X - 23997 | -0.059 | 0.089 | 0.504 | 0.697 | -0.014 | 0.091 | 0.880 | 0.944 | 0.180  | 0.193 | 0.351 | 0.885 |
| X - 24077 | -0.075 | 0.072 | 0.297 | 0.519 | -0.045 | 0.075 | 0.554 | 0.749 | 0.113  | 0.160 | 0.481 | 0.902 |
| X - 24241 | -0.001 | 0.081 | 0.987 | 0.991 | 0.015  | 0.084 | 0.861 | 0.941 | 0.074  | 0.181 | 0.685 | 0.980 |
| X - 24243 | 0.050  | 0.084 | 0.550 | 0.727 | 0.096  | 0.089 | 0.285 | 0.521 | 0.233  | 0.197 | 0.238 | 0.845 |
| X - 24293 | 0.120  | 0.080 | 0.139 | 0.335 | 0.061  | 0.084 | 0.469 | 0.686 | -0.243 | 0.183 | 0.188 | 0.839 |
| X - 24295 | 0.114  | 0.082 | 0.164 | 0.362 | 0.130  | 0.085 | 0.127 | 0.322 | 0.115  | 0.182 | 0.527 | 0.942 |
| X - 24306 | -0.011 | 0.073 | 0.877 | 0.932 | -0.030 | 0.076 | 0.699 | 0.838 | -0.086 | 0.162 | 0.595 | 0.961 |
| X - 24307 | -0.021 | 0.071 | 0.769 | 0.878 | -0.048 | 0.074 | 0.519 | 0.730 | -0.130 | 0.158 | 0.411 | 0.893 |
| X - 24337 | 0.213  | 0.080 | 0.009 | 0.051 | 0.200  | 0.084 | 0.018 | 0.087 | 0.020  | 0.179 | 0.913 | 0.992 |
| X - 24344 | -0.008 | 0.215 | 0.971 | 0.988 | -0.070 | 0.210 | 0.743 | 0.870 | -0.298 | 0.463 | 0.525 | 0.942 |
| X - 24411 | 0.216  | 0.141 | 0.130 | 0.322 | 0.232  | 0.142 | 0.108 | 0.289 | 0.174  | 0.303 | 0.567 | 0.947 |
| X - 24418 | 0.396  | 0.204 | 0.065 | 0.204 | 0.337  | 0.187 | 0.085 | 0.249 | 0.024  | 0.510 | 0.963 | 0.994 |
| X - 24422 | -0.032 | 0.076 | 0.673 | 0.809 | -0.076 | 0.079 | 0.336 | 0.575 | -0.211 | 0.167 | 0.210 | 0.841 |
| X - 24431 | -0.053 | 0.089 | 0.553 | 0.729 | -0.088 | 0.092 | 0.343 | 0.581 | -0.182 | 0.199 | 0.363 | 0.888 |
| X - 24432 | 0.044  | 0.129 | 0.735 | 0.855 | -0.098 | 0.135 | 0.472 | 0.686 | -0.622 | 0.278 | 0.029 | 0.738 |
| X - 24435 | 0.207  | 0.081 | 0.011 | 0.060 | 0.195  | 0.085 | 0.022 | 0.100 | 0.020  | 0.180 | 0.911 | 0.992 |
| X - 24455 | 0.063  | 0.098 | 0.519 | 0.708 | 0.006  | 0.103 | 0.954 | 0.972 | -0.264 | 0.228 | 0.249 | 0.848 |
| X - 24456 | 0.242  | 0.143 | 0.095 | 0.264 | 0.220  | 0.147 | 0.140 | 0.344 | -0.012 | 0.332 | 0.971 | 0.995 |
| X - 24473 | 0.012  | 0.081 | 0.883 | 0.937 | 0.041  | 0.084 | 0.626 | 0.782 | 0.137  | 0.179 | 0.446 | 0.902 |
| X - 24475 | -0.018 | 0.082 | 0.827 | 0.914 | -0.044 | 0.086 | 0.607 | 0.771 | -0.128 | 0.185 | 0.491 | 0.911 |
| X - 24518 | 0.234  | 0.142 | 0.103 | 0.277 | 0.182  | 0.142 | 0.204 | 0.428 | -0.064 | 0.273 | 0.817 | 0.988 |
| X - 24527 | 0.261  | 0.153 | 0.093 | 0.260 | 0.293  | 0.160 | 0.071 | 0.216 | 0.227  | 0.320 | 0.481 | 0.902 |
| X - 24540 | -0.020 | 0.099 | 0.838 | 0.920 | 0.053  | 0.099 | 0.594 | 0.765 | 0.402  | 0.233 | 0.087 | 0.819 |
| X - 24542 | 0.014  | 0.099 | 0.892 | 0.942 | 0.069  | 0.105 | 0.512 | 0.725 | 0.255  | 0.224 | 0.256 | 0.848 |

|           |        |       |       |       |        |       |       |       |        |       |       |       |
|-----------|--------|-------|-------|-------|--------|-------|-------|-------|--------|-------|-------|-------|
| X - 24544 | 0.140  | 0.075 | 0.062 | 0.199 | 0.072  | 0.080 | 0.366 | 0.604 | -0.260 | 0.166 | 0.119 | 0.819 |
| X - 24546 | 0.120  | 0.083 | 0.149 | 0.345 | 0.070  | 0.089 | 0.431 | 0.652 | -0.175 | 0.181 | 0.337 | 0.883 |
| X - 24549 | 0.051  | 0.090 | 0.574 | 0.746 | 0.054  | 0.095 | 0.573 | 0.758 | 0.029  | 0.207 | 0.889 | 0.992 |
| X - 24556 | 0.089  | 0.077 | 0.245 | 0.465 | 0.081  | 0.080 | 0.310 | 0.550 | -0.004 | 0.171 | 0.983 | 0.997 |
| X - 24565 | 0.098  | 0.095 | 0.303 | 0.525 | 0.094  | 0.097 | 0.333 | 0.574 | 0.028  | 0.199 | 0.887 | 0.992 |
| X - 24608 | 0.009  | 0.105 | 0.933 | 0.967 | 0.070  | 0.109 | 0.522 | 0.732 | 0.284  | 0.234 | 0.226 | 0.844 |
| X - 24637 | 0.018  | 0.111 | 0.869 | 0.930 | -0.070 | 0.117 | 0.550 | 0.747 | -0.375 | 0.241 | 0.123 | 0.819 |
| X - 24686 | 0.198  | 0.092 | 0.032 | 0.130 | 0.268  | 0.096 | 0.006 | 0.037 | 0.378  | 0.204 | 0.067 | 0.819 |
| X - 24699 | 0.111  | 0.087 | 0.204 | 0.417 | 0.089  | 0.091 | 0.330 | 0.571 | -0.061 | 0.195 | 0.756 | 0.982 |
| X - 24727 | 0.022  | 0.134 | 0.867 | 0.930 | 0.082  | 0.143 | 0.568 | 0.757 | 0.272  | 0.303 | 0.372 | 0.888 |
| X - 24736 | 0.081  | 0.112 | 0.472 | 0.671 | 0.042  | 0.117 | 0.719 | 0.852 | -0.148 | 0.250 | 0.556 | 0.947 |
| X - 24748 | 0.136  | 0.075 | 0.070 | 0.212 | 0.196  | 0.077 | 0.012 | 0.061 | 0.326  | 0.164 | 0.049 | 0.819 |
| X - 24765 | 0.039  | 0.087 | 0.657 | 0.803 | 0.061  | 0.090 | 0.500 | 0.712 | 0.116  | 0.193 | 0.547 | 0.947 |
| X - 24812 | 0.011  | 0.092 | 0.908 | 0.953 | -0.031 | 0.092 | 0.734 | 0.864 | -0.186 | 0.196 | 0.345 | 0.885 |
| X - 24813 | 0.046  | 0.082 | 0.572 | 0.745 | 0.091  | 0.085 | 0.288 | 0.525 | 0.220  | 0.182 | 0.230 | 0.844 |
| X - 24849 | -0.204 | 0.082 | 0.013 | 0.069 | -0.245 | 0.085 | 0.004 | 0.029 | -0.259 | 0.181 | 0.155 | 0.819 |
| X - 24947 | -0.056 | 0.073 | 0.449 | 0.651 | -0.091 | 0.076 | 0.234 | 0.463 | -0.180 | 0.162 | 0.270 | 0.855 |
| X - 24949 | 0.189  | 0.085 | 0.028 | 0.117 | 0.222  | 0.089 | 0.013 | 0.068 | 0.216  | 0.190 | 0.259 | 0.848 |
| X - 24951 | 0.059  | 0.072 | 0.411 | 0.618 | 0.023  | 0.075 | 0.764 | 0.884 | -0.149 | 0.161 | 0.358 | 0.887 |
| X - 24952 | 0.096  | 0.077 | 0.214 | 0.427 | 0.073  | 0.080 | 0.362 | 0.600 | -0.068 | 0.172 | 0.692 | 0.980 |
| X - 24972 | -0.142 | 0.083 | 0.088 | 0.249 | -0.162 | 0.087 | 0.064 | 0.205 | -0.137 | 0.185 | 0.460 | 0.902 |
| X - 25172 | -0.036 | 0.085 | 0.678 | 0.811 | -0.015 | 0.089 | 0.862 | 0.941 | 0.079  | 0.190 | 0.679 | 0.980 |
| X - 25220 | 0.111  | 0.097 | 0.257 | 0.476 | 0.044  | 0.099 | 0.658 | 0.809 | -0.284 | 0.220 | 0.201 | 0.841 |
| X - 25265 | 0.004  | 0.089 | 0.962 | 0.984 | -0.002 | 0.093 | 0.983 | 0.989 | -0.027 | 0.199 | 0.892 | 0.992 |
| X - 25266 | -0.071 | 0.073 | 0.330 | 0.550 | -0.091 | 0.076 | 0.232 | 0.462 | -0.116 | 0.163 | 0.477 | 0.902 |
| X - 25267 | -0.016 | 0.082 | 0.846 | 0.922 | 0.020  | 0.086 | 0.814 | 0.914 | 0.159  | 0.183 | 0.387 | 0.889 |
| X - 25271 | -0.002 | 0.077 | 0.984 | 0.990 | 0.081  | 0.081 | 0.318 | 0.559 | 0.373  | 0.170 | 0.030 | 0.738 |
| X - 25279 | 0.022  | 0.079 | 0.784 | 0.883 | 0.002  | 0.084 | 0.978 | 0.988 | -0.089 | 0.186 | 0.632 | 0.974 |
| X - 25343 | -0.128 | 0.076 | 0.091 | 0.256 | -0.046 | 0.079 | 0.561 | 0.755 | 0.328  | 0.167 | 0.051 | 0.819 |
| X - 25388 | 0.147  | 0.093 | 0.116 | 0.299 | 0.145  | 0.098 | 0.141 | 0.344 | 0.033  | 0.222 | 0.881 | 0.992 |
| X - 25419 | 0.043  | 0.067 | 0.528 | 0.713 | 0.080  | 0.071 | 0.265 | 0.497 | 0.211  | 0.166 | 0.206 | 0.841 |
| X - 25420 | -0.136 | 0.069 | 0.051 | 0.175 | -0.115 | 0.072 | 0.114 | 0.298 | 0.047  | 0.154 | 0.759 | 0.982 |
| X - 25422 | 0.136  | 0.088 | 0.126 | 0.316 | 0.150  | 0.092 | 0.104 | 0.285 | 0.114  | 0.197 | 0.563 | 0.947 |

|                            |        |       |       |       |        |       |       |       |        |       |       |       |
|----------------------------|--------|-------|-------|-------|--------|-------|-------|-------|--------|-------|-------|-------|
| X - 25463                  | -0.077 | 0.083 | 0.358 | 0.574 | -0.048 | 0.087 | 0.584 | 0.765 | 0.105  | 0.186 | 0.573 | 0.947 |
| xanthine                   | 0.178  | 0.083 | 0.034 | 0.133 | 0.186  | 0.087 | 0.034 | 0.135 | 0.099  | 0.186 | 0.594 | 0.961 |
| xanthurenate               | 0.041  | 0.084 | 0.622 | 0.779 | 0.053  | 0.088 | 0.545 | 0.744 | 0.067  | 0.187 | 0.718 | 0.980 |
| ximenoylcarnitine (C26:1)* | 0.089  | 0.051 | 0.084 | 0.242 | 0.121  | 0.053 | 0.024 | 0.106 | 0.176  | 0.114 | 0.122 | 0.819 |
| xylose                     | 0.193  | 0.093 | 0.040 | 0.149 | 0.151  | 0.096 | 0.118 | 0.305 | -0.105 | 0.203 | 0.607 | 0.963 |

---



**Supplementary Table 5. Observational associations of metabolic biomarkers with NAFLD**

| Biochemical                                             | HR    | logHR  | SE    | p-value | p-BH  |
|---------------------------------------------------------|-------|--------|-------|---------|-------|
| <i>FDR-adjusted p-value&lt;0.05</i>                     |       |        |       |         |       |
| 1-(1-enyl-palmitoyl)-2-oleoyl-GPC (P-16:0/18:1)*        | 0.551 | -0.595 | 0.164 | 0.000   | 0.018 |
| 1-linoleoyl-GPG (18:2)*                                 | 1.859 | 0.620  | 0.184 | 0.001   | 0.031 |
| 1-myristoyl-2-palmitoyl-GPC (14:0/16:0)                 | 1.920 | 0.652  | 0.168 | 0.000   | 0.010 |
| 1-palmitoyl-2-dihomo-linolenoyl-GPC (16:0/20:3n3 or 6)* | 1.915 | 0.650  | 0.183 | 0.000   | 0.023 |
| 1-palmitoyl-2-oleoyl-GPE (16:0/18:1)                    | 1.708 | 0.535  | 0.168 | 0.001   | 0.048 |
| 1-palmitoyl-2-palmitoleoyl-GPC (16:0/16:1)*             | 1.942 | 0.664  | 0.180 | 0.000   | 0.017 |
| 1-stearoyl-2-oleoyl-GPC (18:0/18:1)                     | 1.899 | 0.641  | 0.200 | 0.001   | 0.047 |
| 2-hydroxybehenate                                       | 1.811 | 0.594  | 0.155 | 0.000   | 0.010 |
| 4-acetamidophenol                                       | 0.092 | -2.391 | 0.605 | 0.000   | 0.009 |
| 4-cholesten-3-one                                       | 1.791 | 0.583  | 0.177 | 0.001   | 0.037 |
| 5-acetylamino-6-amino-3-methyluracil                    | 0.486 | -0.721 | 0.211 | 0.001   | 0.030 |
| 5alpha-androstan-3alpha,17beta-diol disulfate           | 2.934 | 1.076  | 0.319 | 0.001   | 0.031 |
| androstenediol (3beta,17beta) monosulfate (2)           | 1.952 | 0.669  | 0.210 | 0.001   | 0.048 |
| behenoyl dihydrosphingomyelin (d18:0/22:0)*             | 1.916 | 0.650  | 0.153 | 0.000   | 0.003 |
| butyrylcarnitine (C4)                                   | 1.907 | 0.645  | 0.165 | 0.000   | 0.009 |
| cysteine-glutathione disulfide                          | 0.437 | -0.827 | 0.181 | 0.000   | 0.001 |
| diacylglycerol (14:0/18:1, 16:0/16:1) [2]*              | 1.707 | 0.535  | 0.163 | 0.001   | 0.037 |
| glutamate                                               | 1.947 | 0.666  | 0.140 | 0.000   | 0.000 |
| hexadecasphingosine (d16:1)*                            | 1.885 | 0.634  | 0.186 | 0.001   | 0.030 |
| nisinate (24:6n3)                                       | 1.753 | 0.562  | 0.160 | 0.000   | 0.024 |
| phenylacetylglutamine                                   | 0.616 | -0.485 | 0.143 | 0.001   | 0.030 |
| sphingomyelin (d18:0/20:0, d16:0/22:0)*                 | 1.741 | 0.554  | 0.151 | 0.000   | 0.018 |
| X - 11381                                               | 1.938 | 0.662  | 0.187 | 0.000   | 0.023 |
| X - 11850                                               | 0.575 | -0.553 | 0.168 | 0.001   | 0.037 |
| X - 12707                                               | 0.601 | -0.509 | 0.153 | 0.001   | 0.034 |
| X - 13729                                               | 0.329 | -1.111 | 0.169 | 0.000   | 0.000 |
| X - 21286                                               | 0.653 | -0.426 | 0.128 | 0.001   | 0.034 |
| X - 21785                                               | 1.820 | 0.599  | 0.156 | 0.000   | 0.010 |
| X - 23997                                               | 0.512 | -0.669 | 0.162 | 0.000   | 0.005 |

|           |       |       |       |       |       |
|-----------|-------|-------|-------|-------|-------|
| X - 24241 | 2.152 | 0.766 | 0.223 | 0.001 | 0.030 |
|-----------|-------|-------|-------|-------|-------|

**FDR-adjusted p-value >= 0.05**

|                                                        |       |        |       |       |       |
|--------------------------------------------------------|-------|--------|-------|-------|-------|
| (14 or 15)-methylpalmitate (a17:0 or i17:0)            | 1.074 | 0.071  | 0.128 | 0.577 | 0.821 |
| (16 or 17)-methylstearate (a19:0 or i19:0)             | 0.958 | -0.043 | 0.145 | 0.769 | 0.919 |
| (2,4 or 2,5)-dimethylphenol sulfate                    | 1.151 | 0.141  | 0.189 | 0.458 | 0.748 |
| (N(1) + N(8))-acetylspermidine                         | 1.165 | 0.153  | 0.126 | 0.223 | 0.547 |
| 1-(1-enyl-oleoyl)-GPE (P-18:1)*                        | 0.869 | -0.141 | 0.168 | 0.404 | 0.710 |
| 1-(1-enyl-palmitoyl)-2-arachidonoyl-GPC (P-16:0/20:4)* | 0.727 | -0.319 | 0.144 | 0.027 | 0.211 |
| 1-(1-enyl-palmitoyl)-2-arachidonoyl-GPE (P-16:0/20:4)* | 0.859 | -0.152 | 0.158 | 0.336 | 0.664 |
| 1-(1-enyl-palmitoyl)-2-linoleoyl-GPC (P-16:0/18:2)*    | 0.730 | -0.314 | 0.144 | 0.029 | 0.221 |
| 1-(1-enyl-palmitoyl)-2-linoleoyl-GPE (P-16:0/18:2)*    | 0.915 | -0.089 | 0.141 | 0.530 | 0.788 |
| 1-(1-enyl-palmitoyl)-2-oleoyl-GPE (P-16:0/18:1)*       | 0.938 | -0.064 | 0.153 | 0.677 | 0.878 |
| 1-(1-enyl-palmitoyl)-2-palmitoleoyl-GPC (P-16:0/16:1)* | 0.648 | -0.434 | 0.159 | 0.006 | 0.097 |
| 1-(1-enyl-palmitoyl)-2-palmitoyl-GPC (P-16:0/16:0)*    | 0.741 | -0.299 | 0.150 | 0.047 | 0.281 |
| 1-(1-enyl-palmitoyl)-GPC (P-16:0)*                     | 0.836 | -0.179 | 0.151 | 0.236 | 0.554 |
| 1-(1-enyl-palmitoyl)-GPE (P-16:0)*                     | 0.983 | -0.018 | 0.156 | 0.910 | 0.973 |
| 1-(1-enyl-stearoyl)-2-arachidonoyl-GPE (P-18:0/20:4)*  | 0.737 | -0.305 | 0.157 | 0.051 | 0.287 |
| 1-(1-enyl-stearoyl)-2-linoleoyl-GPE (P-18:0/18:2)*     | 1.066 | 0.064  | 0.159 | 0.686 | 0.882 |
| 1-(1-enyl-stearoyl)-2-oleoyl-GPE (P-18:0/18:1)         | 0.977 | -0.024 | 0.194 | 0.903 | 0.970 |
| 1-(1-enyl-stearoyl)-GPE (P-18:0)*                      | 0.837 | -0.178 | 0.171 | 0.297 | 0.628 |
| 1,2,3-benzenetriol sulfate (2)                         | 0.980 | -0.020 | 0.121 | 0.871 | 0.966 |
| 1,2-dilinoleoyl-GPC (18:2/18:2)                        | 1.176 | 0.162  | 0.149 | 0.276 | 0.603 |
| 1,2-dilinoleoyl-GPE (18:2/18:2)*                       | 1.255 | 0.227  | 0.137 | 0.096 | 0.382 |
| 1,2-dipalmitoyl-GPC (16:0/16:0)                        | 1.085 | 0.081  | 0.138 | 0.557 | 0.810 |
| 1,2-dipalmitoyl-GPE (16:0/16:0)*                       | 1.303 | 0.265  | 0.158 | 0.094 | 0.381 |
| 1,3-dimethylurate                                      | 0.774 | -0.256 | 0.181 | 0.157 | 0.474 |
| 1,5-anhydroglucitol (1,5-AG)                           | 0.987 | -0.013 | 0.138 | 0.922 | 0.973 |
| 1,7-dimethylurate                                      | 0.624 | -0.471 | 0.182 | 0.010 | 0.120 |
| 10-heptadecenoate (17:1n7)                             | 1.077 | 0.074  | 0.133 | 0.577 | 0.821 |
| 10-nonadecenoate (19:1n9)                              | 1.036 | 0.035  | 0.128 | 0.783 | 0.924 |
| 10-undecenoate (11:1n1)                                | 1.283 | 0.249  | 0.175 | 0.153 | 0.473 |
| 12,13-DiHOME                                           | 1.081 | 0.078  | 0.143 | 0.585 | 0.824 |

|                                               |       |        |       |       |       |
|-----------------------------------------------|-------|--------|-------|-------|-------|
| 13-HODE + 9-HODE                              | 1.058 | 0.057  | 0.139 | 0.683 | 0.882 |
| 16a-hydroxy DHEA 3-sulfate                    | 1.480 | 0.392  | 0.169 | 0.020 | 0.174 |
| 16-hydroxypalmitate                           | 1.022 | 0.022  | 0.135 | 0.870 | 0.966 |
| 17alpha-hydroxypregnenolone 3-sulfate         | 1.483 | 0.394  | 0.199 | 0.048 | 0.285 |
| 1-arachidonoyl-GPA (20:4)                     | 0.873 | -0.136 | 0.173 | 0.431 | 0.731 |
| 1-arachidonoyl-GPC* (20:4)*                   | 0.883 | -0.124 | 0.158 | 0.433 | 0.731 |
| 1-arachidonoyl-GPE (20:4n6)*                  | 0.969 | -0.031 | 0.176 | 0.860 | 0.960 |
| 1-arachidonoyl-GPI* (20:4)*                   | 1.315 | 0.274  | 0.170 | 0.108 | 0.400 |
| 1-arachidonoylglycerol (20:4)                 | 0.978 | -0.022 | 0.162 | 0.893 | 0.970 |
| 1-carboxyethylisoleucine                      | 1.071 | 0.069  | 0.144 | 0.632 | 0.855 |
| 1-carboxyethylleucine                         | 1.225 | 0.203  | 0.147 | 0.168 | 0.482 |
| 1-carboxyethylphenylalanine                   | 1.317 | 0.275  | 0.142 | 0.052 | 0.287 |
| 1-carboxyethyltyrosine                        | 1.128 | 0.121  | 0.171 | 0.482 | 0.760 |
| 1-carboxyethylvaline                          | 1.432 | 0.359  | 0.151 | 0.017 | 0.162 |
| 1-dihomo-linolenylglycerol (20:3)             | 1.310 | 0.270  | 0.147 | 0.066 | 0.323 |
| 1-dihomo-linoleoylglycerol (20:2)             | 1.097 | 0.092  | 0.169 | 0.585 | 0.824 |
| 1-docosahexaenoylglycerol (22:6)              | 1.174 | 0.160  | 0.164 | 0.329 | 0.659 |
| 1H-indole-7-acetic acid                       | 1.021 | 0.021  | 0.206 | 0.919 | 0.973 |
| 1-lignoceroyl-GPC (24:0)                      | 1.167 | 0.155  | 0.190 | 0.415 | 0.718 |
| 1-linolenylglycerol (18:3)                    | 1.421 | 0.351  | 0.162 | 0.031 | 0.229 |
| 1-linolenyl-GPC (18:3)*                       | 1.512 | 0.413  | 0.164 | 0.012 | 0.139 |
| 1-linoleoyl-2-arachidonoyl-GPC (18:2/20:4n6)* | 0.942 | -0.059 | 0.145 | 0.681 | 0.880 |
| 1-linoleoyl-2-linolenyl-GPC (18:2/18:3)*      | 1.241 | 0.216  | 0.154 | 0.160 | 0.477 |
| 1-linoleoylglycerol (18:2)                    | 1.440 | 0.365  | 0.144 | 0.011 | 0.135 |
| 1-linoleoyl-GPA (18:2)*                       | 0.969 | -0.032 | 0.174 | 0.854 | 0.957 |
| 1-linoleoyl-GPC (18:2)                        | 1.188 | 0.173  | 0.150 | 0.251 | 0.577 |
| 1-linoleoyl-GPE (18:2)*                       | 1.354 | 0.303  | 0.144 | 0.035 | 0.243 |
| 1-linoleoyl-GPI* (18:2)*                      | 1.411 | 0.345  | 0.163 | 0.035 | 0.242 |
| 1-methyl-4-imidazoleacetate                   | 1.041 | 0.040  | 0.140 | 0.774 | 0.923 |
| 1-methyl-5-imidazoleacetate                   | 0.730 | -0.314 | 0.160 | 0.050 | 0.286 |
| 1-methyladenosine                             | 1.190 | 0.174  | 0.139 | 0.212 | 0.538 |
| 1-methylhistidine                             | 1.103 | 0.098  | 0.171 | 0.566 | 0.815 |
| 1-methylnicotinamide                          | 1.317 | 0.276  | 0.162 | 0.089 | 0.376 |

|                                                |       |        |       |       |       |
|------------------------------------------------|-------|--------|-------|-------|-------|
| 1-methylurate                                  | 1.009 | 0.009  | 0.126 | 0.944 | 0.975 |
| 1-myristoyl-2-arachidonoyl-GPC (14:0/20:4)*    | 1.496 | 0.403  | 0.171 | 0.019 | 0.166 |
| 1-oleoyl-2-docosahexaenoyl-GPC (18:1/22:6)*    | 0.664 | -0.409 | 0.146 | 0.005 | 0.091 |
| 1-oleoyl-2-linoleoyl-GPE (18:1/18:2)*          | 1.220 | 0.199  | 0.143 | 0.164 | 0.480 |
| 1-oleoylglycerol (18:1)                        | 1.560 | 0.445  | 0.161 | 0.006 | 0.092 |
| 1-oleoylglycerophosphate (18:1)                | 0.785 | -0.242 | 0.203 | 0.232 | 0.553 |
| 1-oleoyl-GPC (18:1)                            | 1.026 | 0.026  | 0.200 | 0.896 | 0.970 |
| 1-oleoyl-GPE (18:1)                            | 1.204 | 0.186  | 0.157 | 0.236 | 0.554 |
| 1-oleoyl-GPG (18:1)*                           | 1.574 | 0.454  | 0.180 | 0.012 | 0.138 |
| 1-oleoyl-GPI (18:1)*                           | 1.334 | 0.288  | 0.162 | 0.075 | 0.343 |
| 1-palmitoleoyl-2-linolenoyl-GPC (16:1/18:3)*   | 1.341 | 0.293  | 0.170 | 0.084 | 0.361 |
| 1-palmitoleoylglycerol (16:1)*                 | 1.374 | 0.318  | 0.156 | 0.042 | 0.268 |
| 1-palmitoleoyl-GPC* (16:1)*                    | 1.267 | 0.236  | 0.164 | 0.150 | 0.468 |
| 1-palmitoyl-2-arachidonoyl-GPC (16:0/20:4n6)   | 1.049 | 0.047  | 0.151 | 0.753 | 0.912 |
| 1-palmitoyl-2-arachidonoyl-GPE (16:0/20:4)*    | 1.230 | 0.207  | 0.150 | 0.167 | 0.482 |
| 1-palmitoyl-2-arachidonoyl-GPI (16:0/20:4)*    | 1.540 | 0.431  | 0.157 | 0.006 | 0.097 |
| 1-palmitoyl-2-docosahexaenoyl-GPC (16:0/22:6)  | 0.879 | -0.129 | 0.141 | 0.360 | 0.678 |
| 1-palmitoyl-2-docosahexaenoyl-GPE (16:0/22:6)* | 1.198 | 0.180  | 0.162 | 0.266 | 0.591 |
| 1-palmitoyl-2-linoleoyl-GPC (16:0/18:2)        | 1.548 | 0.437  | 0.152 | 0.004 | 0.077 |
| 1-palmitoyl-2-linoleoyl-GPE (16:0/18:2)        | 1.527 | 0.423  | 0.137 | 0.002 | 0.053 |
| 1-palmitoyl-2-linoleoyl-GPI (16:0/18:2)        | 1.522 | 0.420  | 0.155 | 0.007 | 0.097 |
| 1-palmitoyl-2-oleoyl-GPC (16:0/18:1)           | 1.784 | 0.579  | 0.199 | 0.004 | 0.073 |
| 1-palmitoyl-2-oleoyl-GPI (16:0/18:1)*          | 1.673 | 0.514  | 0.174 | 0.003 | 0.068 |
| 1-palmitoyl-2-stearoyl-GPC (16:0/18:0)         | 1.027 | 0.026  | 0.146 | 0.856 | 0.958 |
| 1-palmitoyl-2-stearoyl-GPE (16:0/18:0)*        | 1.155 | 0.144  | 0.151 | 0.339 | 0.664 |
| 1-palmitoyl-GPC (16:0)                         | 1.297 | 0.260  | 0.137 | 0.057 | 0.296 |
| 1-palmitoyl-GPE (16:0)                         | 1.232 | 0.208  | 0.140 | 0.138 | 0.442 |
| 1-palmitoyl-GPG (16:0)*                        | 1.545 | 0.435  | 0.186 | 0.019 | 0.167 |
| 1-palmitoyl-GPI* (16:0)                        | 1.329 | 0.285  | 0.159 | 0.074 | 0.342 |
| 1-ribosyl-imidazoleacetate*                    | 0.981 | -0.019 | 0.151 | 0.901 | 0.970 |
| 1-stearoyl-2-arachidonoyl-GPC (18:0/20:4)      | 0.963 | -0.038 | 0.138 | 0.781 | 0.924 |
| 1-stearoyl-2-arachidonoyl-GPE (18:0/20:4)      | 1.168 | 0.155  | 0.159 | 0.331 | 0.659 |
| 1-stearoyl-2-arachidonoyl-GPI (18:0/20:4)      | 1.210 | 0.191  | 0.147 | 0.195 | 0.524 |

|                                                  |       |        |       |       |       |
|--------------------------------------------------|-------|--------|-------|-------|-------|
| 1-stearoyl-2-docosahexaenoyl-GPC (18:0/22:6)     | 0.956 | -0.045 | 0.157 | 0.774 | 0.923 |
| 1-stearoyl-2-docosahexaenoyl-GPE (18:0/22:6)*    | 1.374 | 0.318  | 0.169 | 0.061 | 0.306 |
| 1-stearoyl-2-linoleoyl-GPC (18:0/18:2)*          | 1.274 | 0.242  | 0.141 | 0.085 | 0.361 |
| 1-stearoyl-2-linoleoyl-GPE (18:0/18:2)*          | 1.454 | 0.374  | 0.144 | 0.009 | 0.114 |
| 1-stearoyl-2-linoleoyl-GPI (18:0/18:2)           | 1.245 | 0.219  | 0.132 | 0.099 | 0.388 |
| 1-stearoyl-2-oleoyl-GPE (18:0/18:1)              | 1.434 | 0.361  | 0.153 | 0.019 | 0.166 |
| 1-stearoyl-2-oleoyl-GPI (18:0/18:1)*             | 1.208 | 0.189  | 0.149 | 0.206 | 0.535 |
| 1-stearoyl-2-oleoyl-GPS (18:0/18:1)              | 1.289 | 0.254  | 0.119 | 0.033 | 0.241 |
| 1-stearoyl-GPC (18:0)                            | 1.274 | 0.242  | 0.156 | 0.121 | 0.420 |
| 1-stearoyl-GPE (18:0)                            | 1.261 | 0.232  | 0.144 | 0.107 | 0.400 |
| 1-stearoyl-GPG (18:0)                            | 1.546 | 0.436  | 0.163 | 0.007 | 0.105 |
| 1-stearoyl-GPI (18:0)                            | 1.113 | 0.107  | 0.145 | 0.461 | 0.750 |
| 2,2'-Methylenebis(6-tert-butyl-p-cresol)         | 0.941 | -0.060 | 0.130 | 0.642 | 0.861 |
| 2,3-dihydroxy-2-methylbutyrate                   | 1.134 | 0.126  | 0.151 | 0.403 | 0.710 |
| 2,3-dihydroxy-5-methylthio-4-pentenoate (DMTPA)* | 1.138 | 0.129  | 0.151 | 0.392 | 0.697 |
| 2,3-dihydroxyisovalerate                         | 0.922 | -0.081 | 0.148 | 0.583 | 0.824 |
| 21-hydroxypregnenolone disulfate                 | 0.965 | -0.036 | 0.153 | 0.815 | 0.934 |
| 2-aminoadipate                                   | 0.615 | -0.486 | 0.228 | 0.033 | 0.241 |
| 2-aminobutyrate                                  | 1.181 | 0.166  | 0.182 | 0.362 | 0.678 |
| 2-aminoheptanoate                                | 1.172 | 0.158  | 0.144 | 0.271 | 0.598 |
| 2-aminooctanoate                                 | 1.127 | 0.119  | 0.162 | 0.462 | 0.751 |
| 2-aminophenol sulfate                            | 0.925 | -0.078 | 0.184 | 0.673 | 0.876 |
| 2-butenoylglycine                                | 0.770 | -0.262 | 0.200 | 0.191 | 0.523 |
| 2'-deoxyuridine                                  | 0.878 | -0.130 | 0.134 | 0.330 | 0.659 |
| 2-ethylphenylsulfate                             | 0.995 | -0.005 | 0.226 | 0.981 | 0.989 |
| 2-hydroxy-3-methylvalerate                       | 1.290 | 0.255  | 0.137 | 0.064 | 0.318 |
| 2-hydroxyarachidate*                             | 1.332 | 0.287  | 0.137 | 0.037 | 0.246 |
| 2-hydroxybutyrate/2-hydroxyisobutyrate           | 1.170 | 0.157  | 0.130 | 0.227 | 0.551 |
| 2-hydroxydecanoate                               | 1.143 | 0.133  | 0.148 | 0.367 | 0.678 |
| 2-hydroxyfluorene sulfate                        | 1.096 | 0.092  | 0.203 | 0.651 | 0.867 |
| 2-hydroxyglutarate                               | 0.951 | -0.050 | 0.194 | 0.798 | 0.926 |
| 2-hydroxyheptanoate*                             | 1.020 | 0.019  | 0.105 | 0.853 | 0.957 |
| 2-hydroxyhippurate (salicylurate)                | 0.950 | -0.051 | 0.157 | 0.743 | 0.912 |

|                                        |       |        |       |       |       |
|----------------------------------------|-------|--------|-------|-------|-------|
| 2-hydroxylaurate                       | 1.238 | 0.214  | 0.155 | 0.168 | 0.482 |
| 2-hydroxynervonate*                    | 1.683 | 0.521  | 0.259 | 0.044 | 0.270 |
| 2-hydroxyoctanoate                     | 1.558 | 0.443  | 0.150 | 0.003 | 0.067 |
| 2-hydroxypalmitate                     | 1.264 | 0.234  | 0.133 | 0.078 | 0.349 |
| 2-hydroxyphenylacetate                 | 1.006 | 0.006  | 0.147 | 0.967 | 0.983 |
| 2-hydroxystearate                      | 1.299 | 0.262  | 0.138 | 0.057 | 0.296 |
| 2-isopropylmalate                      | 0.741 | -0.300 | 0.149 | 0.043 | 0.270 |
| 2-keto-3-deoxy-gluconate               | 1.040 | 0.039  | 0.144 | 0.785 | 0.924 |
| 2-linoleoylglycerol (18:2)             | 1.292 | 0.256  | 0.147 | 0.080 | 0.353 |
| 2-methylbutyrylcarnitine (C5)          | 1.228 | 0.206  | 0.161 | 0.201 | 0.530 |
| 2-methylcitrate/homocitrate            | 0.797 | -0.227 | 0.203 | 0.264 | 0.590 |
| 2-methylmalonylcarnitine (C4-DC)       | 1.028 | 0.028  | 0.182 | 0.878 | 0.970 |
| 2-naphthol sulfate                     | 1.326 | 0.282  | 0.180 | 0.117 | 0.416 |
| 2-oleoylglycerol (18:1)                | 1.343 | 0.295  | 0.152 | 0.053 | 0.288 |
| 2'-O-methylcytidine                    | 0.901 | -0.104 | 0.139 | 0.452 | 0.740 |
| 2'-O-methyluridine                     | 0.847 | -0.166 | 0.195 | 0.393 | 0.697 |
| 2-oxoarginine*                         | 1.359 | 0.307  | 0.137 | 0.025 | 0.201 |
| 2-palmitoleoylglycerol (16:1)*         | 0.970 | -0.030 | 0.151 | 0.840 | 0.948 |
| 2-palmitoleoyl-GPC* (16:1)*            | 0.930 | -0.073 | 0.158 | 0.646 | 0.865 |
| 2-palmitoyl-GPC* (16:0)*               | 1.121 | 0.114  | 0.148 | 0.441 | 0.733 |
| 2-piperidinone                         | 0.878 | -0.130 | 0.139 | 0.350 | 0.677 |
| 2-stearoyl-GPE (18:0)*                 | 1.128 | 0.120  | 0.148 | 0.418 | 0.718 |
| 3-(3-amino-3-carboxypropyl)uridine*    | 1.127 | 0.120  | 0.197 | 0.544 | 0.799 |
| 3-(3-hydroxyphenyl)propionate          | 1.283 | 0.249  | 0.196 | 0.204 | 0.532 |
| 3-(4-hydroxyphenyl)lactate (HPLA)      | 1.133 | 0.125  | 0.154 | 0.419 | 0.718 |
| 3-(methylthio)acetaminophen sulfate*   | 3.982 | 1.382  | 0.438 | 0.002 | 0.050 |
| 3,4-methyleneheptanoate                | 0.864 | -0.146 | 0.204 | 0.474 | 0.760 |
| 3,4-methyleneheptanoylcarnitine        | 1.288 | 0.253  | 0.176 | 0.152 | 0.469 |
| 3-acetylphenol sulfate                 | 1.320 | 0.278  | 0.193 | 0.150 | 0.468 |
| 3-amino-2-piperidone                   | 0.923 | -0.080 | 0.128 | 0.532 | 0.790 |
| 3-aminoisobutyrate                     | 1.016 | 0.016  | 0.143 | 0.912 | 0.973 |
| 3beta,7alpha-dihydroxy-5-cholestenoate | 1.658 | 0.506  | 0.210 | 0.016 | 0.155 |
| 3beta-hydroxy-5-cholestenoate          | 0.723 | -0.324 | 0.160 | 0.043 | 0.269 |

|                                                         |       |        |       |       |       |
|---------------------------------------------------------|-------|--------|-------|-------|-------|
| 3b-hydroxy-5-cholenoic acid                             | 0.709 | -0.344 | 0.162 | 0.034 | 0.242 |
| 3-carboxy-4-methyl-5-pentyl-2-furanpropionate (3-CMPFP) | 1.014 | 0.014  | 0.186 | 0.940 | 0.975 |
| 3-carboxy-4-methyl-5-propyl-2-furanpropanoate (CMPF)    | 1.029 | 0.029  | 0.241 | 0.905 | 0.970 |
| 3-ethylcatechol sulfate (1)                             | 1.648 | 0.500  | 0.263 | 0.057 | 0.296 |
| 3-ethylphenylsulfate                                    | 1.311 | 0.271  | 0.308 | 0.379 | 0.685 |
| 3-formylindole                                          | 1.299 | 0.262  | 0.131 | 0.045 | 0.272 |
| 3-hydroxy-2-ethylpropionate                             | 1.172 | 0.159  | 0.138 | 0.250 | 0.577 |
| 3-hydroxy-3-methylglutarate                             | 0.748 | -0.290 | 0.155 | 0.061 | 0.308 |
| 3-hydroxybutyrate (BHBA)                                | 0.905 | -0.099 | 0.129 | 0.441 | 0.733 |
| 3-hydroxybutyroylglycine                                | 0.771 | -0.260 | 0.154 | 0.092 | 0.377 |
| 3-hydroxybutyrylcarnitine (1)                           | 1.037 | 0.036  | 0.218 | 0.869 | 0.966 |
| 3-hydroxybutyrylcarnitine (2)                           | 1.018 | 0.018  | 0.164 | 0.913 | 0.973 |
| 3-hydroxydecanoate                                      | 1.005 | 0.005  | 0.133 | 0.968 | 0.983 |
| 3-hydroxydodecanedioate*                                | 0.841 | -0.173 | 0.196 | 0.377 | 0.682 |
| 3-hydroxyhexanoate                                      | 1.179 | 0.164  | 0.131 | 0.209 | 0.536 |
| 3-hydroxyhippurate                                      | 1.052 | 0.051  | 0.144 | 0.725 | 0.901 |
| 3-hydroxyisobutyrate                                    | 1.208 | 0.189  | 0.132 | 0.151 | 0.468 |
| 3-hydroxylaurate                                        | 1.060 | 0.059  | 0.128 | 0.648 | 0.865 |
| 3-hydroxyoctanoate                                      | 0.946 | -0.056 | 0.143 | 0.697 | 0.886 |
| 3-hydroxyoleoylcarnitine                                | 1.130 | 0.122  | 0.155 | 0.431 | 0.731 |
| 3-hydroxypalmitoylcarnitine                             | 1.619 | 0.482  | 0.215 | 0.025 | 0.201 |
| 3-hydroxypyridine sulfate                               | 0.982 | -0.018 | 0.154 | 0.906 | 0.970 |
| 3-hydroxysebacate                                       | 0.822 | -0.196 | 0.160 | 0.221 | 0.547 |
| 3-hydroxystachydrine*                                   | 1.041 | 0.040  | 0.173 | 0.815 | 0.934 |
| 3-indoxyl sulfate                                       | 0.720 | -0.328 | 0.124 | 0.008 | 0.109 |
| 3-methoxycatechol sulfate (1)                           | 0.961 | -0.040 | 0.122 | 0.745 | 0.912 |
| 3-methoxycatechol sulfate (2)                           | 0.905 | -0.100 | 0.198 | 0.614 | 0.842 |
| 3-methoxytyramine sulfate                               | 1.013 | 0.013  | 0.160 | 0.936 | 0.975 |
| 3-methoxytyrosine                                       | 0.980 | -0.020 | 0.135 | 0.881 | 0.970 |
| 3-methyl catechol sulfate (1)                           | 1.128 | 0.121  | 0.179 | 0.499 | 0.767 |
| 3-methyl-2-oxobutyrate                                  | 1.320 | 0.278  | 0.155 | 0.073 | 0.341 |
| 3-methyl-2-oxovalerate                                  | 1.334 | 0.288  | 0.137 | 0.036 | 0.245 |
| 3-methyladipate                                         | 1.872 | 0.627  | 0.310 | 0.043 | 0.269 |

|                                                     |       |        |       |       |       |
|-----------------------------------------------------|-------|--------|-------|-------|-------|
| 3-methylglutaconate                                 | 0.922 | -0.082 | 0.142 | 0.565 | 0.814 |
| 3-methylglutaryl carnitine (2)                      | 1.045 | 0.044  | 0.132 | 0.739 | 0.910 |
| 3-methylhistidine                                   | 0.925 | -0.078 | 0.135 | 0.563 | 0.813 |
| 3-methylxanthine                                    | 0.555 | -0.588 | 0.211 | 0.005 | 0.092 |
| 3-phenylpropionate (hydrocinnamate)                 | 0.839 | -0.176 | 0.136 | 0.195 | 0.524 |
| 3-phosphoglycerate                                  | 1.011 | 0.011  | 0.137 | 0.938 | 0.975 |
| 3-ureidopropionate                                  | 0.809 | -0.212 | 0.188 | 0.260 | 0.586 |
| 4-acetamidobutanoate                                | 0.951 | -0.050 | 0.150 | 0.736 | 0.910 |
| 4-acetamidophenylglucuronide                        | 0.692 | -0.368 | 0.354 | 0.299 | 0.629 |
| 4-acetaminophen sulfate                             | 1.602 | 0.471  | 0.311 | 0.129 | 0.431 |
| 4-acetylphenyl sulfate                              | 0.805 | -0.217 | 0.140 | 0.120 | 0.420 |
| 4-allylphenol sulfate                               | 1.193 | 0.176  | 0.156 | 0.258 | 0.584 |
| 4-ethylphenyl sulfate                               | 0.791 | -0.235 | 0.141 | 0.095 | 0.381 |
| 4-guanidinobutanoate                                | 1.246 | 0.220  | 0.142 | 0.122 | 0.420 |
| 4-hydroxy-2-oxoglutaric acid                        | 1.034 | 0.034  | 0.227 | 0.882 | 0.970 |
| 4-hydroxychlorothalonil                             | 0.985 | -0.015 | 0.168 | 0.928 | 0.975 |
| 4-hydroxyglutamate                                  | 1.359 | 0.307  | 0.150 | 0.041 | 0.265 |
| 4-hydroxyhippurate                                  | 1.021 | 0.021  | 0.139 | 0.881 | 0.970 |
| 4-hydroxyphenylacetate                              | 0.776 | -0.254 | 0.146 | 0.083 | 0.358 |
| 4-hydroxyphenylacetylglutamine                      | 0.998 | -0.002 | 0.159 | 0.989 | 0.992 |
| 4-hydroxyphenylpyruvate                             | 1.076 | 0.073  | 0.150 | 0.627 | 0.853 |
| 4-methoxyphenol sulfate                             | 0.962 | -0.039 | 0.189 | 0.835 | 0.945 |
| 4-methyl-2-oxopentanoate                            | 1.287 | 0.253  | 0.130 | 0.052 | 0.287 |
| 4-methylcatechol sulfate                            | 0.825 | -0.192 | 0.146 | 0.190 | 0.522 |
| 4-methylguaiacol sulfate                            | 1.261 | 0.232  | 0.164 | 0.159 | 0.474 |
| 4-vinylguaiacol sulfate                             | 1.119 | 0.112  | 0.172 | 0.513 | 0.774 |
| 4-vinylphenol sulfate                               | 1.362 | 0.309  | 0.156 | 0.048 | 0.285 |
| 5-(galactosylhydroxy)-L-lysine                      | 1.019 | 0.018  | 0.159 | 0.908 | 0.971 |
| 5,6-dihydrothymine                                  | 1.284 | 0.250  | 0.143 | 0.082 | 0.355 |
| 5,6-dihydrouracil                                   | 1.070 | 0.067  | 0.154 | 0.660 | 0.871 |
| 5,6-dihydrouridine                                  | 0.939 | -0.063 | 0.167 | 0.706 | 0.888 |
| 5-acetylamino-6-formylamino-3-methyluracil          | 0.594 | -0.522 | 0.231 | 0.024 | 0.195 |
| 5alpha-androstan-3alpha,17beta-diol monosulfate (1) | 1.479 | 0.391  | 0.201 | 0.052 | 0.287 |



|                                                     |       |        |       |       |       |
|-----------------------------------------------------|-------|--------|-------|-------|-------|
| 5alpha-androstan-3alpha,17beta-diol monosulfate (2) | 1.415 | 0.347  | 0.246 | 0.159 | 0.474 |
| 5alpha-androstan-3beta,17alpha-diol disulfate       | 1.045 | 0.044  | 0.176 | 0.801 | 0.927 |
| 5alpha-androstan-3beta,17beta-diol disulfate        | 2.216 | 0.796  | 0.271 | 0.003 | 0.069 |
| 5alpha-androstan-3beta,17beta-diol monosulfate (2)  | 1.735 | 0.551  | 0.223 | 0.013 | 0.142 |
| 5alpha-pregnan-3beta,20alpha-diol disulfate         | 1.037 | 0.037  | 0.140 | 0.793 | 0.926 |
| 5alpha-pregnan-3beta,20alpha-diol monosulfate (2)   | 0.788 | -0.239 | 0.158 | 0.131 | 0.431 |
| 5alpha-pregnan-3beta,20beta-diol monosulfate (1)    | 0.993 | -0.007 | 0.153 | 0.966 | 0.983 |
| 5alpha-pregnan-diol disulfate                       | 0.789 | -0.237 | 0.228 | 0.297 | 0.628 |
| 5-dodecenoate (12:1n7)                              | 0.925 | -0.078 | 0.134 | 0.558 | 0.810 |
| 5-dodecenoylcarnitine (C12:1)                       | 1.128 | 0.120  | 0.139 | 0.387 | 0.693 |
| 5-HEPE                                              | 2.225 | 0.800  | 0.435 | 0.066 | 0.323 |
| 5-hydroxyhexanoate                                  | 0.966 | -0.035 | 0.122 | 0.775 | 0.923 |
| 5-hydroxylysine                                     | 1.016 | 0.015  | 0.149 | 0.918 | 0.973 |
| 5-methylthioadenosine (MTA)                         | 1.130 | 0.122  | 0.171 | 0.477 | 0.760 |
| 5-methyluridine (ribothymidine)                     | 0.877 | -0.131 | 0.137 | 0.338 | 0.664 |
| 5-oxoproline                                        | 0.897 | -0.109 | 0.133 | 0.412 | 0.718 |
| 6-bromotryptophan                                   | 1.420 | 0.350  | 0.184 | 0.056 | 0.296 |
| 6-hydroxyindole sulfate                             | 0.698 | -0.359 | 0.131 | 0.006 | 0.097 |
| 6-oxopiperidine-2-carboxylate                       | 0.833 | -0.182 | 0.134 | 0.172 | 0.492 |
| 7-HOCA                                              | 1.302 | 0.264  | 0.160 | 0.100 | 0.389 |
| 7-methylguanine                                     | 1.322 | 0.279  | 0.157 | 0.075 | 0.343 |
| 8-hydroxyoctanoate                                  | 0.925 | -0.078 | 0.174 | 0.656 | 0.868 |
| 9,10-DiHOME                                         | 0.978 | -0.022 | 0.161 | 0.890 | 0.970 |
| 9-hydroxystearate                                   | 1.076 | 0.073  | 0.152 | 0.629 | 0.853 |
| acesulfame                                          | 0.787 | -0.239 | 0.264 | 0.366 | 0.678 |
| acetylcarnitine (C2)                                | 1.133 | 0.125  | 0.139 | 0.369 | 0.678 |
| acisoga                                             | 1.126 | 0.119  | 0.150 | 0.429 | 0.731 |
| aconitate [cis or trans]                            | 1.039 | 0.038  | 0.148 | 0.798 | 0.926 |
| adenine                                             | 1.141 | 0.132  | 0.145 | 0.363 | 0.678 |
| adipoylcarnitine (C6-DC)                            | 1.450 | 0.372  | 0.197 | 0.059 | 0.303 |
| adrenate (22:4n6)                                   | 1.124 | 0.117  | 0.123 | 0.344 | 0.671 |
| adrenoylcarnitine (C22:4)*                          | 1.026 | 0.026  | 0.184 | 0.890 | 0.970 |
| alanine                                             | 1.242 | 0.217  | 0.145 | 0.134 | 0.435 |

|                                                  |       |        |       |       |       |
|--------------------------------------------------|-------|--------|-------|-------|-------|
| allantoin                                        | 1.178 | 0.164  | 0.142 | 0.249 | 0.577 |
| alliin                                           | 1.338 | 0.291  | 0.167 | 0.081 | 0.353 |
| alpha-hydroxycaproate                            | 1.449 | 0.371  | 0.151 | 0.014 | 0.145 |
| alpha-hydroxyisocaproate                         | 1.407 | 0.342  | 0.138 | 0.014 | 0.142 |
| alpha-hydroxyisovalerate                         | 1.366 | 0.312  | 0.148 | 0.035 | 0.242 |
| alpha-ketobutyrate                               | 1.318 | 0.276  | 0.155 | 0.074 | 0.342 |
| alpha-ketoglutarate*                             | 0.833 | -0.183 | 0.181 | 0.313 | 0.647 |
| alpha-ketoglutarate                              | 1.098 | 0.093  | 0.173 | 0.590 | 0.824 |
| alpha-tocopherol                                 | 1.423 | 0.353  | 0.130 | 0.007 | 0.097 |
| AMP                                              | 1.108 | 0.103  | 0.152 | 0.498 | 0.766 |
| andro steroid monosulfate C19H28O6S (1)*         | 1.587 | 0.462  | 0.175 | 0.008 | 0.109 |
| androstenediol (3alpha, 17alpha) monosulfate (2) | 1.076 | 0.074  | 0.227 | 0.746 | 0.912 |
| androstenediol (3alpha, 17alpha) monosulfate (3) | 1.049 | 0.048  | 0.243 | 0.845 | 0.952 |
| androstenediol (3beta, 17beta) disulfate (1)     | 1.989 | 0.688  | 0.224 | 0.002 | 0.053 |
| androstenediol (3beta, 17beta) disulfate (2)     | 1.379 | 0.322  | 0.256 | 0.209 | 0.536 |
| androstenediol (3beta, 17beta) monosulfate (1)   | 1.345 | 0.297  | 0.187 | 0.113 | 0.409 |
| androsterone glucuronide                         | 1.285 | 0.251  | 0.206 | 0.223 | 0.547 |
| androsterone sulfate                             | 1.156 | 0.145  | 0.214 | 0.497 | 0.766 |
| arabinose                                        | 1.127 | 0.120  | 0.154 | 0.437 | 0.732 |
| arabitol/xylitol                                 | 0.914 | -0.090 | 0.136 | 0.509 | 0.771 |
| arabonate/xylonate                               | 1.018 | 0.018  | 0.147 | 0.903 | 0.970 |
| arachidate (20:0)                                | 1.133 | 0.125  | 0.150 | 0.405 | 0.711 |
| arachidonate (20:4n6)                            | 0.941 | -0.061 | 0.141 | 0.666 | 0.871 |
| arachidonoylcarnitine (C20:4)                    | 0.991 | -0.010 | 0.175 | 0.957 | 0.980 |
| arachidonoylcholine                              | 1.040 | 0.039  | 0.144 | 0.784 | 0.924 |
| arachidoylecarnitine (C20)*                      | 1.269 | 0.238  | 0.177 | 0.179 | 0.500 |
| argininate*                                      | 1.251 | 0.224  | 0.144 | 0.119 | 0.420 |
| arginine                                         | 1.112 | 0.106  | 0.144 | 0.461 | 0.750 |
| asparagine                                       | 0.875 | -0.134 | 0.111 | 0.228 | 0.551 |
| aspartate                                        | 1.402 | 0.338  | 0.145 | 0.019 | 0.167 |
| azelate (nonanedioate; C9)                       | 1.203 | 0.185  | 0.152 | 0.222 | 0.547 |
| behenoyl sphingomyelin (d18:1/22:0)*             | 1.680 | 0.519  | 0.213 | 0.015 | 0.150 |
| behenoylcarnitine (C22)*                         | 1.397 | 0.334  | 0.159 | 0.035 | 0.243 |

|                                                |        |        |       |       |       |
|------------------------------------------------|--------|--------|-------|-------|-------|
| benzoate                                       | 1.055  | 0.053  | 0.122 | 0.662 | 0.871 |
| beta-alanine                                   | 1.234  | 0.210  | 0.165 | 0.201 | 0.530 |
| beta-citrylglutamate                           | 1.533  | 0.427  | 0.144 | 0.003 | 0.065 |
| beta-cryptoxanthin                             | 1.356  | 0.305  | 0.137 | 0.026 | 0.207 |
| beta-hydroxyisovalerate                        | 1.286  | 0.252  | 0.134 | 0.060 | 0.303 |
| betaine                                        | 0.729  | -0.315 | 0.154 | 0.040 | 0.262 |
| beta-sitosterol                                | 0.844  | -0.170 | 0.166 | 0.308 | 0.638 |
| bilirubin                                      | 1.101  | 0.096  | 0.142 | 0.501 | 0.768 |
| bilirubin (E,E)*                               | 0.866  | -0.144 | 0.146 | 0.324 | 0.654 |
| bilirubin (E,Z or Z,E)*                        | 1.070  | 0.068  | 0.142 | 0.632 | 0.855 |
| biliverdin                                     | 0.896  | -0.110 | 0.157 | 0.486 | 0.763 |
| bradykinin                                     | 14.807 | 2.695  | 3.126 | 0.389 | 0.693 |
| bradykinin, des-arg(9)                         | 1.194  | 0.177  | 0.487 | 0.716 | 0.892 |
| caffeic acid sulfate                           | 0.870  | -0.139 | 0.155 | 0.372 | 0.678 |
| caffeine                                       | 0.892  | -0.115 | 0.162 | 0.478 | 0.760 |
| campesterol                                    | 0.982  | -0.019 | 0.156 | 0.905 | 0.970 |
| caprate (10:0)                                 | 1.083  | 0.080  | 0.135 | 0.553 | 0.807 |
| caproate (6:0)                                 | 1.113  | 0.107  | 0.159 | 0.502 | 0.768 |
| caprylate (8:0)                                | 1.176  | 0.162  | 0.126 | 0.196 | 0.526 |
| carboxyethyl-GABA                              | 0.827  | -0.190 | 0.135 | 0.158 | 0.474 |
| carnitine                                      | 1.481  | 0.392  | 0.155 | 0.011 | 0.134 |
| carotene diol (1)                              | 1.472  | 0.387  | 0.154 | 0.012 | 0.140 |
| carotene diol (2)                              | 1.197  | 0.180  | 0.147 | 0.220 | 0.547 |
| carotene diol (3)                              | 1.195  | 0.178  | 0.201 | 0.374 | 0.678 |
| catechol sulfate                               | 0.869  | -0.140 | 0.140 | 0.315 | 0.649 |
| ceramide (d16:1/24:1, d18:1/22:1)*             | 1.338  | 0.291  | 0.266 | 0.273 | 0.600 |
| ceramide (d18:1/17:0, d17:1/18:0)*             | 1.178  | 0.164  | 0.146 | 0.263 | 0.590 |
| ceramide (d18:1/20:0, d16:1/22:0, d20:1/18:0)* | 1.519  | 0.418  | 0.150 | 0.005 | 0.092 |
| ceramide (d18:2/24:1, d18:1/24:2)*             | 1.300  | 0.263  | 0.185 | 0.157 | 0.474 |
| cerotylcarnitine (C26)*                        | 1.869  | 0.625  | 0.205 | 0.002 | 0.057 |
| C-glycosyltryptophan                           | 1.142  | 0.133  | 0.173 | 0.443 | 0.733 |
| chenodeoxycholate                              | 1.063  | 0.061  | 0.166 | 0.715 | 0.892 |
| cholate                                        | 1.178  | 0.164  | 0.151 | 0.276 | 0.603 |

|                                                |       |        |       |       |       |
|------------------------------------------------|-------|--------|-------|-------|-------|
| cholesterol                                    | 1.426 | 0.355  | 0.137 | 0.010 | 0.120 |
| choline                                        | 0.911 | -0.093 | 0.153 | 0.542 | 0.798 |
| cinnamoylglycine                               | 0.686 | -0.378 | 0.147 | 0.010 | 0.124 |
| cis-4-decenoate (10:1n6)*                      | 1.063 | 0.061  | 0.141 | 0.666 | 0.871 |
| cis-4-decenoylcarnitine (C10:1)                | 1.122 | 0.115  | 0.146 | 0.431 | 0.731 |
| citramalate                                    | 1.070 | 0.068  | 0.203 | 0.739 | 0.910 |
| citrate                                        | 0.808 | -0.213 | 0.130 | 0.103 | 0.393 |
| citrulline                                     | 0.948 | -0.054 | 0.120 | 0.655 | 0.868 |
| corticosterone                                 | 0.908 | -0.097 | 0.152 | 0.524 | 0.784 |
| cortisol                                       | 0.873 | -0.136 | 0.121 | 0.259 | 0.585 |
| cortisone                                      | 1.085 | 0.082  | 0.125 | 0.513 | 0.774 |
| cotinine                                       | 1.073 | 0.070  | 0.267 | 0.792 | 0.926 |
| creatine                                       | 1.234 | 0.210  | 0.165 | 0.203 | 0.532 |
| creatinine                                     | 0.661 | -0.415 | 0.203 | 0.041 | 0.264 |
| cys-gly, oxidized                              | 0.854 | -0.158 | 0.148 | 0.285 | 0.617 |
| cystathionine                                  | 1.188 | 0.172  | 0.166 | 0.301 | 0.631 |
| cysteine                                       | 1.398 | 0.335  | 0.135 | 0.013 | 0.141 |
| cysteine s-sulfate                             | 1.126 | 0.119  | 0.134 | 0.373 | 0.678 |
| cysteine sulfinic acid                         | 1.220 | 0.199  | 0.132 | 0.130 | 0.431 |
| cysteinylglycine                               | 0.914 | -0.090 | 0.165 | 0.588 | 0.824 |
| cysteinylglycine disulfide*                    | 0.946 | -0.055 | 0.151 | 0.714 | 0.892 |
| cystine                                        | 1.304 | 0.266  | 0.183 | 0.147 | 0.463 |
| cytidine                                       | 1.140 | 0.131  | 0.128 | 0.306 | 0.635 |
| daidzein sulfate (2)                           | 1.190 | 0.174  | 0.154 | 0.259 | 0.585 |
| decanoylcarnitine (C10)                        | 1.111 | 0.105  | 0.129 | 0.414 | 0.718 |
| dehydroisoandrosterone sulfate (DHEA-S)        | 1.082 | 0.079  | 0.204 | 0.699 | 0.887 |
| delta-CEHC glucuronide*                        | 0.920 | -0.083 | 0.260 | 0.749 | 0.912 |
| delta-CEHC*                                    | 0.985 | -0.015 | 0.192 | 0.938 | 0.975 |
| delta-tocopherol                               | 1.084 | 0.081  | 0.307 | 0.792 | 0.926 |
| deoxycarnitine                                 | 0.607 | -0.499 | 0.199 | 0.012 | 0.140 |
| deoxycholate                                   | 0.816 | -0.203 | 0.159 | 0.201 | 0.530 |
| diacylglycerol (14:0/18:1, 16:0/16:1) [1]*     | 1.515 | 0.416  | 0.177 | 0.019 | 0.167 |
| diacylglycerol (16:1/18:2 [2], 16:0/18:3 [1])* | 1.464 | 0.381  | 0.177 | 0.031 | 0.231 |

|                                            |       |        |       |       |       |
|--------------------------------------------|-------|--------|-------|-------|-------|
| dihomolinoleate (20:2n6)                   | 1.005 | 0.005  | 0.119 | 0.968 | 0.983 |
| dihomolinolenate (20:3n3 or 3n6)           | 1.166 | 0.153  | 0.122 | 0.210 | 0.537 |
| dihomo-linolenoylcarnitine (C20:3n3 or 6)* | 1.254 | 0.226  | 0.176 | 0.199 | 0.529 |
| dihomo-linolenoylcholine                   | 1.273 | 0.241  | 0.160 | 0.131 | 0.431 |
| dihomo-linoleoylcarnitine (C20:2)*         | 1.013 | 0.013  | 0.165 | 0.939 | 0.975 |
| dihydrocaffeate sulfate (2)                | 1.028 | 0.027  | 0.124 | 0.826 | 0.939 |
| dihydroferulate                            | 1.242 | 0.217  | 0.188 | 0.250 | 0.577 |
| dihydroferulic acid sulfate                | 1.131 | 0.123  | 0.174 | 0.480 | 0.760 |
| dihydroorotate                             | 0.880 | -0.128 | 0.164 | 0.435 | 0.731 |
| dimethylarginine (ADMA + SDMA)             | 1.095 | 0.091  | 0.171 | 0.596 | 0.827 |
| dimethylglycine                            | 0.893 | -0.113 | 0.146 | 0.437 | 0.732 |
| docosadienoate (22:2n6)                    | 1.227 | 0.204  | 0.178 | 0.252 | 0.577 |
| docosadioate (C22-DC)                      | 1.376 | 0.320  | 0.175 | 0.068 | 0.325 |
| docosahexaenoate (DHA; 22:6n3)             | 0.973 | -0.028 | 0.155 | 0.857 | 0.959 |
| docosahexaenoylcarnitine (C22:6)*          | 1.123 | 0.116  | 0.151 | 0.441 | 0.733 |
| docosahexaenoylcholine                     | 1.024 | 0.024  | 0.147 | 0.871 | 0.966 |
| docosapentaenoate (DPA; 22:5n3)            | 1.122 | 0.115  | 0.142 | 0.418 | 0.718 |
| docosapentaenoate (n6 DPA; 22:5n6)         | 0.940 | -0.061 | 0.131 | 0.639 | 0.861 |
| docosapentaenoylcarnitine (C22:5n3)*       | 1.224 | 0.202  | 0.186 | 0.278 | 0.605 |
| docosatrienoate (22:3n3)                   | 0.979 | -0.021 | 0.137 | 0.880 | 0.970 |
| docosatrienoate (22:3n6)*                  | 0.830 | -0.187 | 0.169 | 0.269 | 0.597 |
| dodecadienoate (12:2)*                     | 1.109 | 0.104  | 0.138 | 0.451 | 0.740 |
| dodecanedioate (C12)                       | 0.952 | -0.049 | 0.134 | 0.715 | 0.892 |
| dodecenedioate (C12:1-DC)*                 | 0.872 | -0.137 | 0.132 | 0.300 | 0.629 |
| dopamine 3-O-sulfate                       | 1.020 | 0.020  | 0.141 | 0.889 | 0.970 |
| DSGEGDFXAEGGGVR*                           | 0.260 | -1.346 | 0.561 | 0.016 | 0.156 |
| ectoine                                    | 0.896 | -0.110 | 0.154 | 0.476 | 0.760 |
| EDTA                                       | 1.147 | 0.137  | 0.200 | 0.494 | 0.766 |
| eicosanedioate (C20-DC)                    | 1.208 | 0.189  | 0.150 | 0.208 | 0.536 |
| eicosapentaenoate (EPA; 20:5n3)            | 1.165 | 0.152  | 0.153 | 0.319 | 0.649 |
| eicosenamide (20:1)*                       | 0.884 | -0.123 | 0.135 | 0.361 | 0.678 |
| eicosenedioate (C20:1-DC)*                 | 0.931 | -0.071 | 0.201 | 0.724 | 0.900 |
| eicosenoate (20:1n9 or 1n11)               | 1.073 | 0.070  | 0.185 | 0.706 | 0.888 |

|                                |       |        |       |       |       |
|--------------------------------|-------|--------|-------|-------|-------|
| eicosenoylcarnitine (C20:1)*   | 1.100 | 0.095  | 0.240 | 0.692 | 0.884 |
| epiandrosterone sulfate        | 0.979 | -0.021 | 0.203 | 0.918 | 0.973 |
| equol sulfate                  | 0.764 | -0.269 | 0.289 | 0.353 | 0.677 |
| ergothioneine                  | 1.056 | 0.054  | 0.160 | 0.734 | 0.909 |
| erucate (22:1n9)               | 1.297 | 0.260  | 0.294 | 0.376 | 0.681 |
| erucoylcarnitine (C22:1)*      | 1.340 | 0.293  | 0.257 | 0.254 | 0.578 |
| erythritol                     | 0.916 | -0.088 | 0.139 | 0.525 | 0.784 |
| erythronate*                   | 1.178 | 0.164  | 0.154 | 0.288 | 0.620 |
| ethylmalonate                  | 1.292 | 0.256  | 0.190 | 0.178 | 0.498 |
| etiocholanolone glucuronide    | 0.740 | -0.301 | 0.196 | 0.124 | 0.423 |
| eugenol sulfate                | 0.872 | -0.137 | 0.179 | 0.442 | 0.733 |
| FAD                            | 1.161 | 0.149  | 0.193 | 0.441 | 0.733 |
| ferulic acid 4-sulfate         | 1.191 | 0.175  | 0.179 | 0.328 | 0.659 |
| formiminoglutamate             | 1.652 | 0.502  | 0.175 | 0.004 | 0.079 |
| fructose                       | 1.156 | 0.145  | 0.160 | 0.364 | 0.678 |
| fumarate                       | 0.864 | -0.146 | 0.133 | 0.271 | 0.598 |
| galactonate                    | 0.942 | -0.060 | 0.179 | 0.739 | 0.910 |
| gamma-carboxyglutamate         | 1.083 | 0.079  | 0.151 | 0.601 | 0.832 |
| gamma-CEHC                     | 1.107 | 0.101  | 0.160 | 0.526 | 0.784 |
| gamma-CEHC glucuronide*        | 1.087 | 0.083  | 0.170 | 0.626 | 0.852 |
| gamma-glutamyl-2-aminobutyrate | 0.994 | -0.006 | 0.156 | 0.972 | 0.983 |
| gamma-glutamylalanine          | 0.988 | -0.012 | 0.155 | 0.939 | 0.975 |
| gamma-glutamyl-alpha-lysine    | 1.065 | 0.063  | 0.138 | 0.649 | 0.865 |
| gamma-glutamylcitrulline*      | 0.705 | -0.350 | 0.140 | 0.013 | 0.141 |
| gamma-glutamyl-epsilon-lysine  | 0.780 | -0.249 | 0.165 | 0.131 | 0.431 |
| gamma-glutamylglutamate        | 1.409 | 0.343  | 0.142 | 0.016 | 0.155 |
| gamma-glutamylglutamine        | 0.698 | -0.359 | 0.130 | 0.006 | 0.092 |
| gamma-glutamylglycine          | 0.786 | -0.241 | 0.135 | 0.075 | 0.343 |
| gamma-glutamylhistidine        | 0.989 | -0.011 | 0.154 | 0.944 | 0.975 |
| gamma-glutamylisoleucine*      | 1.254 | 0.227  | 0.124 | 0.067 | 0.323 |
| gamma-glutamylleucine          | 1.277 | 0.245  | 0.126 | 0.053 | 0.288 |
| gamma-glutamylmethionine       | 0.856 | -0.155 | 0.150 | 0.301 | 0.631 |
| gamma-glutamylphenylalanine    | 1.252 | 0.225  | 0.138 | 0.103 | 0.393 |

|                                        |       |        |       |       |       |
|----------------------------------------|-------|--------|-------|-------|-------|
| gamma-glutamylthreonine                | 0.922 | -0.081 | 0.148 | 0.583 | 0.824 |
| gamma-glutamyltryptophan               | 1.076 | 0.073  | 0.137 | 0.595 | 0.827 |
| gamma-glutamyltyrosine                 | 1.189 | 0.173  | 0.140 | 0.215 | 0.540 |
| gamma-glutamylvaline                   | 1.293 | 0.257  | 0.154 | 0.095 | 0.381 |
| gamma-tocopherol/beta-tocopherol       | 1.505 | 0.409  | 0.182 | 0.025 | 0.201 |
| genistein sulfate*                     | 1.273 | 0.241  | 0.158 | 0.128 | 0.430 |
| gentisate                              | 1.066 | 0.064  | 0.153 | 0.677 | 0.878 |
| gluconate                              | 0.945 | -0.057 | 0.142 | 0.687 | 0.882 |
| glucose                                | 1.161 | 0.149  | 0.136 | 0.271 | 0.598 |
| glucuronate                            | 1.026 | 0.025  | 0.184 | 0.890 | 0.970 |
| glucuronide of C10H18O2 (7)*           | 1.570 | 0.450  | 0.260 | 0.000 | 0.052 |
| glutamine                              | 0.919 | -0.085 | 0.122 | 0.486 | 0.763 |
| glutarate (C5-DC)                      | 0.920 | -0.084 | 0.148 | 0.571 | 0.819 |
| glutaroylcarnitine (C5)                | 1.024 | 0.023  | 0.163 | 0.886 | 0.970 |
| glycerate                              | 1.383 | 0.324  | 0.153 | 0.034 | 0.242 |
| glycerol                               | 1.105 | 0.100  | 0.132 | 0.451 | 0.740 |
| glycerol 3-phosphate                   | 1.581 | 0.458  | 0.195 | 0.019 | 0.166 |
| glycerophosphoethanolamine             | 1.220 | 0.199  | 0.144 | 0.167 | 0.482 |
| glycerophosphoglycerol                 | 1.157 | 0.146  | 0.157 | 0.351 | 0.677 |
| glycerophosphorylcholine (GPC)         | 1.050 | 0.049  | 0.160 | 0.760 | 0.912 |
| glycine                                | 0.743 | -0.298 | 0.148 | 0.044 | 0.270 |
| glycine conjugate of C10H14O2 (1)*     | 0.981 | -0.019 | 0.185 | 0.919 | 0.973 |
| glyco-alpha-muricholate                | 0.789 | -0.237 | 0.161 | 0.141 | 0.449 |
| glyco-beta-muricholate                 | 0.710 | -0.342 | 0.163 | 0.036 | 0.244 |
| glycochenodeoxycholate                 | 1.015 | 0.015  | 0.141 | 0.917 | 0.973 |
| glycochenodeoxycholate 3-sulfate       | 1.241 | 0.216  | 0.149 | 0.146 | 0.461 |
| glycochenodeoxycholate glucuronide (1) | 1.176 | 0.162  | 0.152 | 0.287 | 0.620 |
| glycocholate                           | 1.098 | 0.094  | 0.142 | 0.509 | 0.771 |
| glycocholate sulfate*                  | 1.039 | 0.038  | 0.138 | 0.780 | 0.924 |
| glycodeoxycholate                      | 0.817 | -0.203 | 0.155 | 0.192 | 0.523 |
| glycodeoxycholate 3-sulfate            | 0.889 | -0.117 | 0.149 | 0.432 | 0.731 |
| glycohyocholate                        | 0.895 | -0.111 | 0.127 | 0.384 | 0.691 |
| glycolithocholate                      | 1.115 | 0.109  | 0.165 | 0.508 | 0.771 |

|                                                                |       |        |       |       |       |
|----------------------------------------------------------------|-------|--------|-------|-------|-------|
| glycolithocholate sulfate*                                     | 0.792 | -0.233 | 0.143 | 0.103 | 0.394 |
| glycosyl ceramide (d18:1/20:0, d16:1/22:0)*                    | 0.957 | -0.044 | 0.156 | 0.778 | 0.924 |
| glycosyl ceramide (d18:1/23:1, d17:1/24:1)*                    | 0.749 | -0.289 | 0.229 | 0.207 | 0.535 |
| glycosyl ceramide (d18:2/24:1, d18:1/24:2)*                    | 0.687 | -0.376 | 0.176 | 0.033 | 0.241 |
| glycosyl-N-(2-hydroxynervonoyl)-sphingosine (d18:1/24:1(2OH))* | 1.652 | 0.502  | 0.205 | 0.014 | 0.145 |
| glycosyl-N-behenoyl-sphingadienine (d18:2/22:0)*               | 0.637 | -0.452 | 0.166 | 0.006 | 0.097 |
| glycosyl-N-behenoyl-sphingosine (d18:1/22:0)*                  | 1.058 | 0.056  | 0.147 | 0.703 | 0.888 |
| glycosyl-N-nervonoyl-sphingosine (d18:1/24:1)*                 | 0.616 | -0.485 | 0.245 | 0.047 | 0.284 |
| glycosyl-N-palmitoyl-sphingosine (d18:1/16:0)                  | 0.888 | -0.119 | 0.137 | 0.383 | 0.690 |
| glycosyl-N-stearoyl-sphingosine (d18:1/18:0)                   | 0.946 | -0.055 | 0.143 | 0.698 | 0.887 |
| glycosyl-N-tricosanoyl-sphingadienine (d18:2/23:0)*            | 0.801 | -0.222 | 0.159 | 0.163 | 0.480 |
| glycoursodeoxycholate                                          | 1.012 | 0.011  | 0.139 | 0.934 | 0.975 |
| glycoursodeoxycholate glucuronide (2)                          | 1.072 | 0.069  | 0.299 | 0.816 | 0.935 |
| glycyrrhetinate                                                | 0.877 | -0.131 | 0.259 | 0.613 | 0.842 |
| guaiacol sulfate                                               | 0.898 | -0.107 | 0.161 | 0.505 | 0.770 |
| guanidinoacetate                                               | 1.013 | 0.013  | 0.180 | 0.941 | 0.975 |
| guanidinosuccinate                                             | 0.833 | -0.182 | 0.249 | 0.464 | 0.752 |
| guanosine                                                      | 0.770 | -0.262 | 0.215 | 0.223 | 0.547 |
| gulonate*                                                      | 1.188 | 0.172  | 0.162 | 0.289 | 0.622 |
| heme                                                           | 0.838 | -0.177 | 0.155 | 0.253 | 0.577 |
| heneicosapentaenoate (21:5n3)                                  | 1.394 | 0.332  | 0.217 | 0.125 | 0.426 |
| heptadecenamide (17:1)*                                        | 1.019 | 0.019  | 0.150 | 0.898 | 0.970 |
| heptenedioate (C7:1-DC)*                                       | 0.879 | -0.129 | 0.183 | 0.481 | 0.760 |
| hexadecadienoate (16:2n6)                                      | 1.059 | 0.058  | 0.147 | 0.695 | 0.886 |
| hexadecanedioate (C16)                                         | 1.012 | 0.012  | 0.157 | 0.938 | 0.975 |
| hexadecenedioate (C16:1-DC)*                                   | 0.928 | -0.075 | 0.177 | 0.672 | 0.876 |
| hexanoylcarnitine (C6)                                         | 1.235 | 0.211  | 0.133 | 0.113 | 0.409 |
| hexanoylglutamine                                              | 0.952 | -0.049 | 0.156 | 0.754 | 0.912 |
| hexanoylglycine (C6)                                           | 0.855 | -0.156 | 0.147 | 0.286 | 0.619 |
| hippurate                                                      | 0.899 | -0.107 | 0.137 | 0.434 | 0.731 |
| histidine                                                      | 0.850 | -0.163 | 0.131 | 0.215 | 0.540 |
| histidine betaine (hercynine)*                                 | 1.022 | 0.022  | 0.152 | 0.885 | 0.970 |
| homoarginine                                                   | 1.220 | 0.199  | 0.133 | 0.134 | 0.435 |



|                                                 |       |        |       |       |       |
|-------------------------------------------------|-------|--------|-------|-------|-------|
| homocitrulline                                  | 0.843 | -0.170 | 0.153 | 0.265 | 0.591 |
| homostachydrine*                                | 1.100 | 0.095  | 0.172 | 0.579 | 0.822 |
| homovanillate (HVA)                             | 1.010 | 0.009  | 0.158 | 0.952 | 0.977 |
| HWESASXX*                                       | 1.245 | 0.219  | 0.198 | 0.270 | 0.597 |
| hydantoin-5-propionate                          | 0.903 | -0.102 | 0.145 | 0.480 | 0.760 |
| hydroquinone sulfate                            | 1.014 | 0.014  | 0.170 | 0.936 | 0.975 |
| hydroxyasparagine                               | 1.344 | 0.296  | 0.175 | 0.092 | 0.376 |
| hydroxy-CMPF*                                   | 0.645 | -0.438 | 0.245 | 0.074 | 0.342 |
| hydroxycotinine                                 | 1.500 | 0.405  | 0.239 | 0.090 | 0.376 |
| hydroxy-N6,N6,N6-trimethyllysine*               | 1.016 | 0.016  | 0.160 | 0.922 | 0.973 |
| hydroxypalmitoyl sphingomyelin (d18:1/16:0(OH)) | 1.107 | 0.102  | 0.148 | 0.489 | 0.765 |
| hydroxyproline                                  | 1.118 | 0.111  | 0.155 | 0.474 | 0.760 |
| hyocholate                                      | 0.965 | -0.036 | 0.129 | 0.783 | 0.924 |
| hypotaurine                                     | 0.592 | -0.524 | 0.180 | 0.004 | 0.073 |
| hypoxanthine                                    | 1.064 | 0.062  | 0.150 | 0.678 | 0.879 |
| imidazole lactate                               | 0.872 | -0.137 | 0.162 | 0.399 | 0.704 |
| imidazole propionate                            | 0.936 | -0.066 | 0.111 | 0.553 | 0.807 |
| iminodiacetate (IDA)                            | 1.234 | 0.210  | 0.152 | 0.168 | 0.482 |
| indole-3-carboxylate                            | 1.427 | 0.356  | 0.170 | 0.037 | 0.246 |
| indoleacetate                                   | 1.132 | 0.124  | 0.153 | 0.419 | 0.718 |
| indoleacetylcarnitine*                          | 1.251 | 0.224  | 0.183 | 0.222 | 0.547 |
| indoleacetylglutamine                           | 1.305 | 0.266  | 0.174 | 0.127 | 0.427 |
| indolelactate                                   | 1.039 | 0.039  | 0.153 | 0.800 | 0.927 |
| indolepropionate                                | 0.872 | -0.138 | 0.138 | 0.319 | 0.649 |
| indolin-2-one                                   | 0.675 | -0.393 | 0.180 | 0.029 | 0.223 |
| inosine                                         | 1.035 | 0.034  | 0.149 | 0.820 | 0.936 |
| isobutyrylcarnitine (C4)                        | 0.659 | -0.417 | 0.158 | 0.008 | 0.109 |
| isobutyrylglycine (C4)                          | 1.063 | 0.061  | 0.160 | 0.704 | 0.888 |
| isoeugenol sulfate                              | 1.462 | 0.380  | 0.236 | 0.108 | 0.400 |
| isoleucine                                      | 1.254 | 0.227  | 0.128 | 0.078 | 0.348 |
| isoursodeoxycholate                             | 0.902 | -0.103 | 0.154 | 0.506 | 0.771 |
| isovalerate (C5)                                | 1.228 | 0.205  | 0.152 | 0.176 | 0.497 |
| isovalerylcarnitine (C5)                        | 1.259 | 0.230  | 0.136 | 0.090 | 0.376 |

|                                                     |       |        |       |       |       |
|-----------------------------------------------------|-------|--------|-------|-------|-------|
| isovalerylglycine                                   | 0.827 | -0.190 | 0.162 | 0.242 | 0.565 |
| I-urobilinogen                                      | 1.081 | 0.078  | 0.236 | 0.740 | 0.910 |
| kynurenate                                          | 1.096 | 0.092  | 0.139 | 0.510 | 0.771 |
| kynurenine                                          | 1.105 | 0.100  | 0.136 | 0.466 | 0.754 |
| lactate                                             | 1.082 | 0.079  | 0.140 | 0.574 | 0.820 |
| lactosyl-N-behenoyl-sphingosine (d18:1/22:0)*       | 1.114 | 0.108  | 0.172 | 0.529 | 0.786 |
| lactosyl-N-nervonoyl-sphingosine (d18:1/24:1)*      | 0.693 | -0.367 | 0.189 | 0.052 | 0.287 |
| lactosyl-N-palmitoyl-sphingosine (d18:1/16:0)       | 0.679 | -0.386 | 0.163 | 0.018 | 0.166 |
| lanthionine                                         | 0.800 | -0.224 | 0.148 | 0.131 | 0.431 |
| laurate (12:0)                                      | 1.059 | 0.057  | 0.143 | 0.688 | 0.882 |
| laurylcarnitine (C12)                               | 1.114 | 0.108  | 0.132 | 0.415 | 0.718 |
| leucine                                             | 1.307 | 0.268  | 0.130 | 0.039 | 0.256 |
| leukotriene B4                                      | 0.853 | -0.159 | 0.166 | 0.337 | 0.664 |
| lignoceroyl sphingomyelin (d18:1/24:0)              | 1.319 | 0.277  | 0.192 | 0.149 | 0.467 |
| lignoceroylcarnitine (C24)*                         | 1.723 | 0.544  | 0.180 | 0.003 | 0.059 |
| linoleate (18:2n6)                                  | 1.030 | 0.029  | 0.138 | 0.834 | 0.945 |
| linolenate (18:3n3 or 3n6)                          | 1.088 | 0.084  | 0.151 | 0.579 | 0.822 |
| linolenoylcarnitine (C18:3)*                        | 1.182 | 0.167  | 0.180 | 0.354 | 0.677 |
| linoleoyl ethanolamide                              | 0.987 | -0.013 | 0.175 | 0.943 | 0.975 |
| linoleoyl-arachidonoyl-glycerol (18:2/20:4) [1]*    | 1.331 | 0.286  | 0.159 | 0.071 | 0.338 |
| linoleoyl-arachidonoyl-glycerol (18:2/20:4) [2]*    | 1.278 | 0.245  | 0.162 | 0.131 | 0.431 |
| linoleoylcarnitine (C18:2)*                         | 1.033 | 0.032  | 0.174 | 0.853 | 0.957 |
| linoleoylcholine*                                   | 1.201 | 0.183  | 0.150 | 0.221 | 0.547 |
| linoleoyl-docosahexaenoyl-glycerol (18:2/22:6) [2]* | 1.146 | 0.136  | 0.229 | 0.551 | 0.806 |
| linoleoyl-linolenoyl-glycerol (18:2/18:3) [2]*      | 1.370 | 0.315  | 0.180 | 0.080 | 0.353 |
| linoleoyl-linolenoyl-glycerol (18:2/18:2) [1]*      | 1.194 | 0.177  | 0.180 | 0.323 | 0.653 |
| lithocholate sulfate (1)                            | 1.057 | 0.055  | 0.175 | 0.753 | 0.912 |
| L-urobilin                                          | 1.164 | 0.152  | 0.201 | 0.451 | 0.740 |
| lysine                                              | 1.086 | 0.083  | 0.135 | 0.540 | 0.796 |
| malate                                              | 0.720 | -0.328 | 0.162 | 0.043 | 0.269 |
| maleate                                             | 1.227 | 0.205  | 0.138 | 0.138 | 0.443 |
| mannitol/sorbitol                                   | 1.014 | 0.014  | 0.126 | 0.912 | 0.973 |
| mannonate*                                          | 1.225 | 0.203  | 0.130 | 0.118 | 0.420 |

|                                               |       |        |       |       |       |
|-----------------------------------------------|-------|--------|-------|-------|-------|
| mannose                                       | 1.239 | 0.215  | 0.139 | 0.122 | 0.420 |
| margarate (17:0)                              | 1.016 | 0.016  | 0.121 | 0.896 | 0.970 |
| margaroylcarnitine (C17)*                     | 1.148 | 0.138  | 0.138 | 0.318 | 0.649 |
| mead acid (20:3n9)                            | 1.047 | 0.046  | 0.165 | 0.780 | 0.924 |
| methionine                                    | 1.010 | 0.010  | 0.150 | 0.948 | 0.975 |
| methionine sulfone                            | 1.155 | 0.145  | 0.126 | 0.251 | 0.577 |
| methionine sulfoxide                          | 1.273 | 0.242  | 0.152 | 0.112 | 0.409 |
| methyl glucopyranoside (alpha + beta)         | 1.082 | 0.079  | 0.148 | 0.593 | 0.826 |
| methyl indole-3-acetate                       | 1.355 | 0.304  | 0.162 | 0.061 | 0.306 |
| methyl-4-hydroxybenzoate sulfate              | 0.958 | -0.043 | 0.166 | 0.794 | 0.926 |
| methylnaphthyl sulfate (2)*                   | 1.232 | 0.209  | 0.209 | 0.318 | 0.649 |
| methylsuccinate                               | 0.847 | -0.166 | 0.137 | 0.226 | 0.550 |
| myo-inositol                                  | 1.002 | 0.002  | 0.133 | 0.988 | 0.992 |
| myristate (14:0)                              | 1.124 | 0.117  | 0.137 | 0.394 | 0.698 |
| myristoleate (14:1n5)                         | 0.995 | -0.005 | 0.136 | 0.968 | 0.983 |
| myristoleoylcarnitine (C14:1)*                | 1.061 | 0.059  | 0.138 | 0.666 | 0.871 |
| myristoyl dihydrosphingomyelin (d18:0/14:0)*  | 1.552 | 0.439  | 0.142 | 0.002 | 0.052 |
| myristoylcarnitine (C14)                      | 1.188 | 0.172  | 0.134 | 0.200 | 0.530 |
| myristoyl-linoleoyl-glycerol (14:0/18:2) [1]* | 1.631 | 0.489  | 0.162 | 0.003 | 0.059 |
| N-(2-furoyl)glycine                           | 0.870 | -0.139 | 0.194 | 0.473 | 0.760 |
| N,N,N-trimethyl-5-aminovaleate                | 0.927 | -0.075 | 0.201 | 0.707 | 0.888 |
| N,N,N-trimethyl-alanylproline betaine (TMAP)  | 0.836 | -0.179 | 0.195 | 0.359 | 0.678 |
| N1-Methyl-2-pyridone-5-carboxamide            | 1.270 | 0.239  | 0.170 | 0.158 | 0.474 |
| N1-methylinosine                              | 0.914 | -0.090 | 0.153 | 0.558 | 0.810 |
| N2,N2-dimethylguanosine                       | 1.062 | 0.060  | 0.155 | 0.696 | 0.886 |
| N2,N5-diacetylnornithine                      | 1.008 | 0.008  | 0.190 | 0.968 | 0.983 |
| N2-acetyl,N6-methyllysine                     | 0.678 | -0.389 | 0.197 | 0.049 | 0.286 |
| N4-acetylcytidine                             | 1.105 | 0.100  | 0.140 | 0.475 | 0.760 |
| N6,N6,N6-trimethyllysine                      | 1.072 | 0.069  | 0.154 | 0.652 | 0.867 |
| N6,N6-dimethyllysine                          | 0.791 | -0.234 | 0.138 | 0.091 | 0.376 |
| N6-acetyllysine                               | 0.982 | -0.018 | 0.144 | 0.902 | 0.970 |
| N6-carbamoylthreonyladenosine                 | 1.295 | 0.258  | 0.156 | 0.098 | 0.386 |
| N6-methyllysine                               | 0.798 | -0.225 | 0.148 | 0.126 | 0.427 |

|                                           |       |        |       |       |       |
|-------------------------------------------|-------|--------|-------|-------|-------|
| N-acetyl-1-methylhistidine*               | 1.388 | 0.328  | 0.200 | 0.102 | 0.391 |
| N-acetyl-2-aminooctanoate*                | 1.219 | 0.198  | 0.147 | 0.179 | 0.500 |
| N-acetylalanine                           | 1.011 | 0.011  | 0.138 | 0.938 | 0.975 |
| N-acetyllaiiin                            | 1.406 | 0.340  | 0.154 | 0.027 | 0.212 |
| N-acetylarginine                          | 1.045 | 0.044  | 0.143 | 0.758 | 0.912 |
| N-acetylaspartate (NAA)                   | 0.994 | -0.006 | 0.133 | 0.964 | 0.983 |
| N-acetyl-aspartyl-glutamate (NAAG)        | 0.979 | -0.021 | 0.148 | 0.886 | 0.970 |
| N-acetyl-beta-alanine                     | 1.221 | 0.200  | 0.161 | 0.216 | 0.541 |
| N-acetylcarnosine                         | 1.253 | 0.226  | 0.172 | 0.188 | 0.520 |
| N-acetylcitrulline                        | 0.685 | -0.379 | 0.207 | 0.067 | 0.323 |
| N-acetylglucosamine/N-acetylgalactosamine | 1.181 | 0.166  | 0.157 | 0.291 | 0.624 |
| N-acetylglucosaminylasparagine            | 0.848 | -0.165 | 0.206 | 0.423 | 0.723 |
| N-acetylglutamate                         | 1.051 | 0.050  | 0.139 | 0.718 | 0.895 |
| N-acetylglutamine                         | 0.806 | -0.216 | 0.182 | 0.236 | 0.554 |
| N-acetylglycine                           | 0.768 | -0.264 | 0.152 | 0.082 | 0.358 |
| N-acetylhistidine                         | 0.939 | -0.063 | 0.159 | 0.691 | 0.884 |
| N-acetylisoleucine                        | 1.229 | 0.206  | 0.130 | 0.114 | 0.409 |
| N-acetyl-isoputrescine*                   | 1.177 | 0.163  | 0.151 | 0.282 | 0.611 |
| N-acetylleucine                           | 1.191 | 0.174  | 0.119 | 0.142 | 0.451 |
| N-acetylmethionine                        | 0.668 | -0.404 | 0.149 | 0.007 | 0.097 |
| N-acetylneuraminate                       | 0.963 | -0.038 | 0.150 | 0.800 | 0.927 |
| N-acetylphenylalanine                     | 1.058 | 0.056  | 0.134 | 0.676 | 0.878 |
| N-acetylproline                           | 1.143 | 0.134  | 0.176 | 0.448 | 0.738 |
| N-acetylputrescine                        | 1.290 | 0.254  | 0.151 | 0.092 | 0.376 |
| N-acetylserine                            | 0.806 | -0.216 | 0.194 | 0.266 | 0.591 |
| N-acetyltaurine                           | 0.803 | -0.219 | 0.208 | 0.292 | 0.624 |
| N-acetylthreonine                         | 1.103 | 0.098  | 0.149 | 0.509 | 0.771 |
| N-acetyltryptophan                        | 1.067 | 0.065  | 0.128 | 0.611 | 0.842 |
| N-acetyltyrosine                          | 0.959 | -0.042 | 0.127 | 0.740 | 0.910 |
| N-acetylvaline                            | 1.145 | 0.136  | 0.149 | 0.363 | 0.678 |
| N-behenoyl-sphingadienine (d18:2/22:0)*   | 1.675 | 0.516  | 0.183 | 0.005 | 0.086 |
| N-carbamoylvaline                         | 0.903 | -0.101 | 0.180 | 0.573 | 0.820 |
| N-delta-acetylorithine                    | 0.987 | -0.013 | 0.139 | 0.926 | 0.975 |

|                                               |       |        |       |       |       |
|-----------------------------------------------|-------|--------|-------|-------|-------|
| nervonoylcarnitine (C24:1)*                   | 1.607 | 0.474  | 0.256 | 0.064 | 0.318 |
| N-formylanthranilic acid                      | 0.839 | -0.175 | 0.160 | 0.273 | 0.600 |
| N-formylmethionine                            | 1.047 | 0.046  | 0.171 | 0.788 | 0.926 |
| N-formylphenylalanine                         | 1.139 | 0.130  | 0.114 | 0.251 | 0.577 |
| nicotinamide                                  | 1.282 | 0.248  | 0.153 | 0.106 | 0.398 |
| N-linoleoylglycine                            | 0.851 | -0.162 | 0.161 | 0.316 | 0.649 |
| N-linoleoylserine*                            | 0.803 | -0.219 | 0.168 | 0.192 | 0.523 |
| N-linoleoyltaurine*                           | 0.900 | -0.106 | 0.214 | 0.622 | 0.850 |
| N-methylhydroxyproline                        | 1.261 | 0.232  | 0.193 | 0.229 | 0.552 |
| N-methylpipercolate                           | 0.763 | -0.271 | 0.155 | 0.081 | 0.355 |
| N-methylproline                               | 1.140 | 0.131  | 0.144 | 0.363 | 0.678 |
| N-oleoylserine                                | 1.034 | 0.034  | 0.147 | 0.819 | 0.936 |
| N-oleoyltaurine                               | 1.175 | 0.162  | 0.163 | 0.322 | 0.652 |
| nonadecanoate (19:0)                          | 0.991 | -0.009 | 0.148 | 0.949 | 0.975 |
| nonanoylcarnitine (C9)                        | 1.081 | 0.078  | 0.135 | 0.561 | 0.812 |
| N-palmitoylglycine                            | 1.092 | 0.088  | 0.128 | 0.490 | 0.765 |
| N-palmitoyl-heptadecaspingosine (d17:1/16:0)* | 0.940 | -0.062 | 0.200 | 0.755 | 0.912 |
| N-palmitoylserine                             | 0.994 | -0.006 | 0.171 | 0.971 | 0.983 |
| N-palmitoyl-sphingadienine (d18:2/16:0)*      | 1.075 | 0.072  | 0.158 | 0.648 | 0.865 |
| N-palmitoyl-sphinganine (d18:0/16:0)          | 1.320 | 0.278  | 0.133 | 0.037 | 0.250 |
| N-palmitoyl-sphingosine (d18:1/16:0)          | 1.253 | 0.226  | 0.151 | 0.134 | 0.435 |
| N-stearoylserine*                             | 1.264 | 0.234  | 0.175 | 0.181 | 0.503 |
| N-stearoyl-sphinganine (d18:0/18:0)*          | 1.551 | 0.439  | 0.142 | 0.002 | 0.052 |
| N-stearoyl-sphingosine (d18:1/18:0)*          | 1.413 | 0.346  | 0.140 | 0.014 | 0.143 |
| N-stearoyltaurine                             | 1.253 | 0.226  | 0.159 | 0.157 | 0.474 |
| O-acetylhomoserine                            | 0.959 | -0.042 | 0.121 | 0.728 | 0.903 |
| o-cresol sulfate                              | 1.176 | 0.162  | 0.179 | 0.367 | 0.678 |
| octadecadienedioate (C18:2-DC)*               | 1.239 | 0.214  | 0.142 | 0.130 | 0.431 |
| octadecanedioate (C18)                        | 1.144 | 0.134  | 0.173 | 0.438 | 0.733 |
| octadecanedioylcarnitine (C18-DC)*            | 1.295 | 0.258  | 0.193 | 0.181 | 0.503 |
| octadecenedioate (C18:1-DC)*                  | 0.994 | -0.006 | 0.171 | 0.972 | 0.983 |
| octadecenedioylcarnitine (C18:1-DC)*          | 1.182 | 0.167  | 0.206 | 0.418 | 0.718 |
| octanoylcarnitine (C8)                        | 1.126 | 0.119  | 0.129 | 0.357 | 0.678 |

|                                                     |       |        |       |       |       |
|-----------------------------------------------------|-------|--------|-------|-------|-------|
| oleate/vaccenate (18:1)                             | 1.085 | 0.082  | 0.128 | 0.522 | 0.783 |
| oleoyl ethanolamide                                 | 1.093 | 0.088  | 0.151 | 0.558 | 0.810 |
| oleoyl-arachidonoyl-glycerol (18:1/20:4) [1]*       | 1.311 | 0.271  | 0.153 | 0.077 | 0.346 |
| oleoyl-arachidonoyl-glycerol (18:1/20:4) [2]*       | 1.307 | 0.268  | 0.153 | 0.080 | 0.353 |
| oleoylcarnitine (C18)                               | 1.054 | 0.053  | 0.173 | 0.760 | 0.912 |
| oleoylcholine                                       | 1.196 | 0.179  | 0.148 | 0.225 | 0.550 |
| oleoyl-linolenoyl-glycerol (18:1/18:3) [2]*         | 1.226 | 0.204  | 0.163 | 0.212 | 0.538 |
| oleoyl-linoleoyl-glycerol (18:1/18:2) [1]           | 1.240 | 0.215  | 0.146 | 0.140 | 0.447 |
| oleoyl-linoleoyl-glycerol (18:1/18:2) [2]           | 1.244 | 0.218  | 0.144 | 0.129 | 0.431 |
| oleoyl-oleoyl-glycerol (18:1/18:1) [1]*             | 1.402 | 0.338  | 0.184 | 0.067 | 0.323 |
| oleoyl-oleoyl-glycerol (18:1/18:1) [2]*             | 1.472 | 0.386  | 0.201 | 0.055 | 0.289 |
| ornithine                                           | 0.957 | -0.044 | 0.120 | 0.714 | 0.892 |
| orotate                                             | 0.816 | -0.203 | 0.210 | 0.334 | 0.663 |
| orotidine                                           | 1.361 | 0.308  | 0.190 | 0.105 | 0.396 |
| O-sulfo-L-tyrosine                                  | 0.994 | -0.006 | 0.150 | 0.967 | 0.983 |
| oxalate (ethanedioate)                              | 1.316 | 0.275  | 0.140 | 0.050 | 0.286 |
| palmitate (16:0)                                    | 1.090 | 0.086  | 0.126 | 0.496 | 0.766 |
| palmitoleamide (16:1)*                              | 1.116 | 0.110  | 0.151 | 0.468 | 0.756 |
| palmitoleate (16:1n7)                               | 1.034 | 0.034  | 0.139 | 0.808 | 0.932 |
| palmitoleoyl-arachidonoyl-glycerol (16:1/20:4) [2]* | 1.578 | 0.456  | 0.192 | 0.017 | 0.162 |
| palmitoleoylcarnitine (C16:1)*                      | 1.044 | 0.043  | 0.149 | 0.774 | 0.923 |
| palmitoleoyl-linoleoyl-glycerol (16:1/18:2) [1]*    | 1.360 | 0.308  | 0.158 | 0.052 | 0.287 |
| palmitoyl dihydrosphingomyelin (d18:0/16:0)*        | 0.983 | -0.017 | 0.136 | 0.899 | 0.970 |
| palmitoyl sphingomyelin (d18:1/16:0)                | 0.920 | -0.083 | 0.139 | 0.551 | 0.806 |
| palmitoyl-arachidonoyl-glycerol (16:0/20:4) [1]*    | 1.123 | 0.116  | 0.169 | 0.494 | 0.766 |
| palmitoyl-arachidonoyl-glycerol (16:0/20:4) [2]*    | 1.361 | 0.308  | 0.146 | 0.034 | 0.242 |
| palmitoylcarnitine (C16)                            | 1.444 | 0.367  | 0.151 | 0.015 | 0.153 |
| palmitoylcholine                                    | 1.169 | 0.156  | 0.144 | 0.279 | 0.607 |
| palmitoyl-linoleoyl-glycerol (16:0/18:2) [1]*       | 1.509 | 0.412  | 0.157 | 0.009 | 0.111 |
| palmitoyl-linoleoyl-glycerol (16:0/18:2) [2]*       | 1.559 | 0.444  | 0.157 | 0.005 | 0.085 |
| palmitoyl-oleoyl-glycerol (16:0/18:1) [1]*          | 1.505 | 0.409  | 0.165 | 0.013 | 0.141 |
| palmitoyl-oleoyl-glycerol (16:0/18:1) [2]*          | 1.649 | 0.500  | 0.159 | 0.002 | 0.051 |
| pantothenate (Vitamin B5)                           | 1.067 | 0.065  | 0.134 | 0.629 | 0.853 |

|                                                    |       |        |       |       |       |
|----------------------------------------------------|-------|--------|-------|-------|-------|
| paraxanthine                                       | 0.930 | -0.073 | 0.182 | 0.690 | 0.884 |
| p-cresol glucuronide*                              | 0.713 | -0.339 | 0.166 | 0.041 | 0.264 |
| p-cresol sulfate                                   | 0.689 | -0.373 | 0.142 | 0.009 | 0.111 |
| pentadecanoate (15:0)                              | 1.007 | 0.007  | 0.147 | 0.964 | 0.983 |
| perfluorooctanesulfonate (PFOS)                    | 1.137 | 0.128  | 0.260 | 0.622 | 0.850 |
| perfluorooctanoate (PFOA)*                         | 1.062 | 0.060  | 0.288 | 0.835 | 0.945 |
| phenol glucuronide                                 | 0.893 | -0.113 | 0.179 | 0.527 | 0.785 |
| phenol sulfate                                     | 0.881 | -0.126 | 0.141 | 0.371 | 0.678 |
| phenylacetate                                      | 0.754 | -0.282 | 0.180 | 0.116 | 0.416 |
| phenylacetylcarnitine                              | 0.785 | -0.242 | 0.147 | 0.100 | 0.389 |
| phenylacetylglutamate                              | 0.809 | -0.212 | 0.217 | 0.330 | 0.659 |
| phenylalanine                                      | 1.049 | 0.048  | 0.136 | 0.727 | 0.902 |
| phenyllactate (PLA)                                | 1.070 | 0.068  | 0.163 | 0.677 | 0.878 |
| phenylpyruvate                                     | 1.084 | 0.080  | 0.143 | 0.574 | 0.820 |
| phosphate                                          | 1.067 | 0.065  | 0.125 | 0.602 | 0.832 |
| phosphocholine                                     | 1.555 | 0.442  | 0.157 | 0.005 | 0.089 |
| phosphoethanolamine (PE)                           | 1.532 | 0.426  | 0.147 | 0.004 | 0.074 |
| picolinate                                         | 1.063 | 0.062  | 0.236 | 0.794 | 0.926 |
| pimelate (C7-DC)                                   | 0.896 | -0.110 | 0.173 | 0.525 | 0.784 |
| pimeloylcarnitine/3-methyladipoylcarnitine (C7-DC) | 1.050 | 0.049  | 0.197 | 0.804 | 0.929 |
| pipecolate                                         | 0.919 | -0.084 | 0.119 | 0.480 | 0.760 |
| piperine                                           | 0.599 | -0.513 | 0.170 | 0.002 | 0.059 |
| pregnanediol-3-glucuronide                         | 0.859 | -0.152 | 0.154 | 0.321 | 0.652 |
| pregnanolone/allopregnanolone sulfate              | 1.034 | 0.033  | 0.245 | 0.891 | 0.970 |
| pregnen-diol disulfate*                            | 1.325 | 0.281  | 0.181 | 0.120 | 0.420 |
| pregnenediol sulfate (C21H34O5S)*                  | 1.018 | 0.018  | 0.148 | 0.905 | 0.970 |
| pregnenetriol disulfate*                           | 1.458 | 0.377  | 0.194 | 0.052 | 0.287 |
| pregnenetriol sulfate*                             | 1.260 | 0.231  | 0.192 | 0.229 | 0.552 |
| pregnenolone sulfate                               | 0.883 | -0.125 | 0.178 | 0.483 | 0.761 |
| proline                                            | 1.106 | 0.101  | 0.139 | 0.470 | 0.758 |
| prolylglycine                                      | 1.134 | 0.126  | 0.135 | 0.352 | 0.677 |
| prolylhydroxyproline                               | 0.954 | -0.047 | 0.152 | 0.758 | 0.912 |
| propionylcarnitine (C3)                            | 1.254 | 0.227  | 0.143 | 0.113 | 0.409 |

|                                                     |       |        |       |       |       |
|-----------------------------------------------------|-------|--------|-------|-------|-------|
| propionylglycine (C3)                               | 0.858 | -0.153 | 0.145 | 0.291 | 0.624 |
| propyl 4-hydroxybenzoate sulfate                    | 0.730 | -0.315 | 0.341 | 0.355 | 0.677 |
| pseudouridine                                       | 0.997 | -0.003 | 0.174 | 0.984 | 0.990 |
| pyridoxal                                           | 1.079 | 0.076  | 0.154 | 0.623 | 0.850 |
| pyridoxate                                          | 1.022 | 0.022  | 0.134 | 0.869 | 0.966 |
| pyroglutamine*                                      | 0.876 | -0.133 | 0.197 | 0.502 | 0.768 |
| pyruvate                                            | 1.156 | 0.145  | 0.157 | 0.355 | 0.677 |
| quinat                                              | 0.827 | -0.190 | 0.141 | 0.176 | 0.497 |
| quinolinate                                         | 1.194 | 0.177  | 0.149 | 0.232 | 0.553 |
| retinol (Vitamin A)                                 | 1.304 | 0.266  | 0.171 | 0.120 | 0.420 |
| ribitol                                             | 1.229 | 0.207  | 0.134 | 0.122 | 0.420 |
| ribonate (ribonolactone)                            | 1.136 | 0.127  | 0.142 | 0.368 | 0.678 |
| ribulonate/xylulonate*                              | 1.006 | 0.006  | 0.172 | 0.971 | 0.983 |
| S-(3-hydroxypropyl)mercapturic acid (HPMA)          | 0.930 | -0.072 | 0.221 | 0.744 | 0.912 |
| S-1-pyrroline-5-carboxylate                         | 1.070 | 0.068  | 0.126 | 0.589 | 0.824 |
| saccharin                                           | 1.644 | 0.497  | 0.257 | 0.053 | 0.288 |
| S-adenosylhomocysteine (SAH)                        | 1.134 | 0.126  | 0.221 | 0.569 | 0.817 |
| salicylate                                          | 0.890 | -0.117 | 0.169 | 0.488 | 0.765 |
| salicyluric glucuronide*                            | 1.361 | 0.309  | 0.356 | 0.387 | 0.693 |
| S-allylcysteine                                     | 1.385 | 0.326  | 0.185 | 0.079 | 0.352 |
| sarcosine                                           | 0.892 | -0.114 | 0.139 | 0.412 | 0.718 |
| sebacate (C10-DC)                                   | 1.108 | 0.103  | 0.142 | 0.467 | 0.755 |
| serine                                              | 0.769 | -0.262 | 0.146 | 0.072 | 0.338 |
| S-methylcysteine                                    | 1.131 | 0.123  | 0.142 | 0.388 | 0.693 |
| S-methylcysteine sulfoxide                          | 1.263 | 0.234  | 0.147 | 0.112 | 0.409 |
| S-methylmethionine                                  | 1.054 | 0.053  | 0.161 | 0.742 | 0.911 |
| spermidine                                          | 1.224 | 0.202  | 0.177 | 0.253 | 0.577 |
| sphingadienine                                      | 1.359 | 0.307  | 0.152 | 0.044 | 0.270 |
| sphinganine                                         | 1.232 | 0.208  | 0.131 | 0.112 | 0.409 |
| sphinganine-1-phosphate                             | 0.896 | -0.110 | 0.114 | 0.337 | 0.664 |
| sphingomyelin (d17:1/14:0, d16:1/15:0)*             | 1.151 | 0.141  | 0.180 | 0.435 | 0.731 |
| sphingomyelin (d17:1/16:0, d18:1/15:0, d16:1/17:0)* | 1.136 | 0.128  | 0.167 | 0.444 | 0.734 |
| sphingomyelin (d17:2/16:0, d18:2/15:0)*             | 1.377 | 0.320  | 0.164 | 0.051 | 0.287 |



|                                                                 |       |        |       |       |       |
|-----------------------------------------------------------------|-------|--------|-------|-------|-------|
| sphingomyelin (d18:0/18:0, d19:0/17:0)*                         | 1.594 | 0.466  | 0.149 | 0.002 | 0.051 |
| sphingomyelin (d18:1/14:0, d16:1/16:0)*                         | 1.500 | 0.405  | 0.149 | 0.007 | 0.097 |
| sphingomyelin (d18:1/17:0, d17:1/18:0, d19:1/16:0)              | 0.860 | -0.151 | 0.175 | 0.388 | 0.693 |
| sphingomyelin (d18:1/18:1, d18:2/18:0)                          | 1.008 | 0.008  | 0.130 | 0.949 | 0.975 |
| sphingomyelin (d18:1/19:0, d19:1/18:0)*                         | 1.074 | 0.072  | 0.141 | 0.612 | 0.842 |
| sphingomyelin (d18:1/20:0, d16:1/22:0)*                         | 1.055 | 0.053  | 0.143 | 0.708 | 0.889 |
| sphingomyelin (d18:1/20:1, d18:2/20:0)*                         | 0.656 | -0.421 | 0.156 | 0.007 | 0.101 |
| sphingomyelin (d18:1/20:2, d18:2/20:1, d16:1/22:2)*             | 0.816 | -0.203 | 0.164 | 0.214 | 0.540 |
| sphingomyelin (d18:1/21:0, d17:1/22:0, d16:1/23:0)*             | 1.593 | 0.466  | 0.204 | 0.023 | 0.188 |
| sphingomyelin (d18:1/22:1, d18:2/22:0, d16:1/24:1)*             | 0.964 | -0.036 | 0.182 | 0.842 | 0.949 |
| sphingomyelin (d18:1/22:2, d18:2/22:1, d16:1/24:2)*             | 0.766 | -0.267 | 0.190 | 0.161 | 0.478 |
| sphingomyelin (d18:1/24:1, d18:2/24:0)*                         | 1.028 | 0.028  | 0.224 | 0.901 | 0.970 |
| sphingomyelin (d18:1/25:0, d19:0/24:1, d20:1/23:0, d19:1/24:0)* | 1.483 | 0.394  | 0.205 | 0.054 | 0.289 |
| sphingomyelin (d18:2/14:0, d18:1/14:1)*                         | 1.484 | 0.394  | 0.176 | 0.025 | 0.201 |
| sphingomyelin (d18:2/16:0, d18:1/16:1)*                         | 1.065 | 0.063  | 0.141 | 0.657 | 0.870 |
| sphingomyelin (d18:2/18:1)*                                     | 0.670 | -0.401 | 0.160 | 0.012 | 0.140 |
| sphingomyelin (d18:2/21:0, d16:2/23:0)*                         | 0.987 | -0.013 | 0.175 | 0.942 | 0.975 |
| sphingomyelin (d18:2/23:0, d18:1/23:1, d17:1/24:1)*             | 1.096 | 0.092  | 0.169 | 0.587 | 0.824 |
| sphingomyelin (d18:2/23:1)*                                     | 0.988 | -0.012 | 0.212 | 0.956 | 0.980 |
| sphingomyelin (d18:2/24:1, d18:1/24:2)*                         | 0.777 | -0.252 | 0.156 | 0.106 | 0.398 |
| sphingomyelin (d18:2/24:2)*                                     | 0.781 | -0.247 | 0.243 | 0.310 | 0.642 |
| sphingosine                                                     | 1.140 | 0.131  | 0.139 | 0.347 | 0.675 |
| sphingosine 1-phosphate                                         | 0.901 | -0.105 | 0.131 | 0.425 | 0.726 |
| stachydrine                                                     | 1.202 | 0.184  | 0.127 | 0.149 | 0.467 |
| stearamide (18:0)                                               | 0.851 | -0.161 | 0.133 | 0.228 | 0.551 |
| stearate (18:0)                                                 | 0.982 | -0.019 | 0.130 | 0.887 | 0.970 |
| stearidonate (18:4n3)                                           | 1.319 | 0.277  | 0.166 | 0.095 | 0.381 |
| stearoyl sphingomyelin (d18:1/18:0)                             | 0.918 | -0.086 | 0.143 | 0.549 | 0.805 |
| stearoyl-arachidonoyl-glycerol (18:0/20:4) [1]*                 | 0.945 | -0.057 | 0.150 | 0.706 | 0.888 |
| stearoyl-arachidonoyl-glycerol (18:0/20:4) [2]*                 | 1.117 | 0.110  | 0.135 | 0.414 | 0.718 |
| stearoylcarnitine (C18)                                         | 1.279 | 0.246  | 0.190 | 0.195 | 0.524 |
| stearoylcholine*                                                | 1.254 | 0.227  | 0.138 | 0.100 | 0.391 |
| suberate (C8-DC)                                                | 1.088 | 0.084  | 0.136 | 0.535 | 0.793 |

|                                         |       |        |       |       |       |
|-----------------------------------------|-------|--------|-------|-------|-------|
| suberoylcarnitine (C8-DC)               | 1.120 | 0.113  | 0.176 | 0.521 | 0.782 |
| succinate                               | 0.887 | -0.120 | 0.135 | 0.373 | 0.678 |
| succinimide                             | 0.894 | -0.112 | 0.171 | 0.515 | 0.776 |
| succinylcarnitine (C4)                  | 0.968 | -0.033 | 0.138 | 0.811 | 0.933 |
| sucrose                                 | 1.053 | 0.051  | 0.169 | 0.761 | 0.912 |
| sulfate*                                | 1.022 | 0.021  | 0.162 | 0.895 | 0.970 |
| syringol sulfate                        | 0.784 | -0.243 | 0.291 | 0.405 | 0.711 |
| tartarate                               | 1.058 | 0.057  | 0.129 | 0.661 | 0.871 |
| tartronate (hydroxymalonate)            | 1.226 | 0.204  | 0.130 | 0.117 | 0.416 |
| taurine                                 | 1.277 | 0.245  | 0.137 | 0.074 | 0.342 |
| taurochenodeoxycholate                  | 1.064 | 0.062  | 0.144 | 0.666 | 0.871 |
| taurochenodeoxycholic acid 3-sulfate    | 1.068 | 0.066  | 0.198 | 0.740 | 0.910 |
| taurocholate                            | 1.085 | 0.082  | 0.164 | 0.616 | 0.844 |
| taurocholate sulfate*                   | 1.105 | 0.100  | 0.134 | 0.458 | 0.748 |
| taurodeoxycholate                       | 0.820 | -0.198 | 0.173 | 0.252 | 0.577 |
| taurodeoxycholic acid 3-sulfate         | 0.683 | -0.381 | 0.249 | 0.126 | 0.426 |
| tauroolithocholate 3-sulfate            | 0.992 | -0.008 | 0.179 | 0.964 | 0.983 |
| tauroursodeoxycholate                   | 0.725 | -0.321 | 0.224 | 0.151 | 0.468 |
| tetradecadienedioate (C14:2-DC)*        | 0.827 | -0.191 | 0.151 | 0.206 | 0.535 |
| tetradecadienoate (14:2)*               | 1.031 | 0.030  | 0.132 | 0.820 | 0.936 |
| tetradecanedioate (C14)                 | 0.980 | -0.021 | 0.154 | 0.893 | 0.970 |
| theanine                                | 1.109 | 0.103  | 0.222 | 0.642 | 0.861 |
| theobromine                             | 0.845 | -0.168 | 0.173 | 0.331 | 0.659 |
| theophylline                            | 0.652 | -0.427 | 0.185 | 0.021 | 0.178 |
| thioprolin                              | 1.539 | 0.431  | 0.159 | 0.007 | 0.097 |
| threonate                               | 1.225 | 0.203  | 0.145 | 0.161 | 0.478 |
| threonine                               | 0.778 | -0.251 | 0.169 | 0.137 | 0.442 |
| thymol sulfate                          | 0.995 | -0.005 | 0.142 | 0.975 | 0.985 |
| thyroxine                               | 0.799 | -0.225 | 0.161 | 0.164 | 0.480 |
| tiglyl carnitine (C5)                   | 0.813 | -0.207 | 0.151 | 0.171 | 0.489 |
| trans-urocanate                         | 0.795 | -0.229 | 0.169 | 0.174 | 0.495 |
| tricosanoyl sphingomyelin (d18:1/23:0)* | 1.404 | 0.340  | 0.202 | 0.093 | 0.380 |
| tridecenedioate (C13:1-DC)*             | 0.835 | -0.181 | 0.172 | 0.294 | 0.626 |

|                                    |       |        |       |       |       |
|------------------------------------|-------|--------|-------|-------|-------|
| trigonelline (N'-methylnicotinate) | 0.782 | -0.246 | 0.144 | 0.086 | 0.367 |
| trimethylamine N-oxide             | 0.766 | -0.267 | 0.189 | 0.157 | 0.474 |
| tryptophan                         | 1.326 | 0.282  | 0.167 | 0.091 | 0.376 |
| tryptophan betaine                 | 1.193 | 0.177  | 0.151 | 0.241 | 0.565 |
| tyramine O-sulfate                 | 0.794 | -0.231 | 0.134 | 0.084 | 0.361 |
| tyrosine                           | 1.266 | 0.236  | 0.127 | 0.063 | 0.314 |
| umbelliferone sulfate              | 0.723 | -0.324 | 0.249 | 0.193 | 0.523 |
| undecanedioate (C11-DC)            | 0.960 | -0.041 | 0.146 | 0.778 | 0.924 |
| uracil                             | 0.948 | -0.054 | 0.142 | 0.706 | 0.888 |
| urate                              | 1.635 | 0.492  | 0.177 | 0.005 | 0.092 |
| urea                               | 0.980 | -0.021 | 0.164 | 0.899 | 0.970 |
| uridine                            | 1.086 | 0.082  | 0.159 | 0.606 | 0.837 |
| ursodeoxycholate                   | 0.976 | -0.024 | 0.145 | 0.868 | 0.966 |
| valerate (5:0)                     | 0.932 | -0.070 | 0.147 | 0.633 | 0.855 |
| valine                             | 1.422 | 0.352  | 0.135 | 0.009 | 0.113 |
| valylleucine                       | 0.958 | -0.043 | 0.189 | 0.822 | 0.936 |
| vanillactate                       | 1.086 | 0.082  | 0.180 | 0.647 | 0.865 |
| vanillylmandelate (VMA)            | 1.039 | 0.038  | 0.130 | 0.767 | 0.918 |
| X - 07765                          | 1.174 | 0.160  | 0.173 | 0.354 | 0.677 |
| X - 09789                          | 1.053 | 0.052  | 0.129 | 0.688 | 0.882 |
| X - 10458                          | 1.027 | 0.027  | 0.144 | 0.853 | 0.957 |
| X - 11261                          | 1.059 | 0.057  | 0.184 | 0.756 | 0.912 |
| X - 11308                          | 1.216 | 0.195  | 0.204 | 0.337 | 0.664 |
| X - 11315                          | 1.455 | 0.375  | 0.159 | 0.018 | 0.166 |
| X - 11372                          | 1.013 | 0.013  | 0.168 | 0.939 | 0.975 |
| X - 11378                          | 1.194 | 0.177  | 0.190 | 0.351 | 0.677 |
| X - 11407                          | 0.988 | -0.012 | 0.162 | 0.941 | 0.975 |
| X - 11441                          | 0.945 | -0.057 | 0.138 | 0.681 | 0.880 |
| X - 11442                          | 0.963 | -0.038 | 0.138 | 0.784 | 0.924 |
| X - 11444                          | 1.168 | 0.156  | 0.123 | 0.207 | 0.535 |
| X - 11470                          | 0.967 | -0.034 | 0.149 | 0.821 | 0.936 |
| X - 11478                          | 0.839 | -0.175 | 0.182 | 0.336 | 0.664 |
| X - 11491                          | 1.002 | 0.002  | 0.141 | 0.991 | 0.993 |

|                                                   |       |        |       |       |       |
|---------------------------------------------------|-------|--------|-------|-------|-------|
| X - 11522                                         | 0.989 | -0.011 | 0.146 | 0.940 | 0.975 |
| X - 11530                                         | 1.012 | 0.012  | 0.150 | 0.937 | 0.975 |
| X - 11632                                         | 1.100 | 0.095  | 0.140 | 0.499 | 0.767 |
| X - 11787                                         | 1.190 | 0.174  | 0.134 | 0.193 | 0.523 |
| X - 11795                                         | 1.270 | 0.239  | 0.155 | 0.123 | 0.420 |
| X - 11843                                         | 0.712 | -0.340 | 0.149 | 0.023 | 0.188 |
| X - 11847                                         | 1.145 | 0.135  | 0.165 | 0.412 | 0.718 |
| X - 11849                                         | 1.369 | 0.314  | 0.161 | 0.051 | 0.287 |
| X - 11852                                         | 1.273 | 0.241  | 0.203 | 0.234 | 0.553 |
| X - 11858                                         | 1.114 | 0.108  | 0.158 | 0.493 | 0.766 |
| X - 11861                                         | 1.388 | 0.328  | 0.231 | 0.155 | 0.474 |
| X - 11880                                         | 1.136 | 0.128  | 0.182 | 0.484 | 0.762 |
| X - 12007                                         | 1.002 | 0.002  | 0.168 | 0.991 | 0.993 |
| X - 12013                                         | 0.736 | -0.307 | 0.222 | 0.167 | 0.482 |
| X - 12015                                         | 1.064 | 0.062  | 0.142 | 0.662 | 0.871 |
| X - 12026                                         | 0.876 | -0.132 | 0.143 | 0.354 | 0.677 |
| X - 12063                                         | 1.463 | 0.381  | 0.158 | 0.016 | 0.155 |
| X - 12093 - retired for N2-acetyl,N6-methyllysine | 0.679 | -0.387 | 0.197 | 0.049 | 0.286 |
| X - 12100                                         | 0.971 | -0.030 | 0.159 | 0.853 | 0.957 |
| X - 12101                                         | 1.061 | 0.059  | 0.149 | 0.692 | 0.884 |
| X - 12104                                         | 0.862 | -0.148 | 0.188 | 0.432 | 0.731 |
| X - 12112                                         | 0.764 | -0.269 | 0.149 | 0.071 | 0.338 |
| X - 12117                                         | 1.029 | 0.029  | 0.229 | 0.900 | 0.970 |
| X - 12127                                         | 1.190 | 0.174  | 0.137 | 0.203 | 0.532 |
| X - 12170                                         | 0.960 | -0.040 | 0.156 | 0.796 | 0.926 |
| X - 12193                                         | 1.102 | 0.097  | 0.127 | 0.442 | 0.733 |
| X - 12206                                         | 1.133 | 0.125  | 0.121 | 0.303 | 0.632 |
| X - 12212                                         | 1.004 | 0.004  | 0.133 | 0.976 | 0.985 |
| X - 12216                                         | 0.672 | -0.398 | 0.129 | 0.002 | 0.052 |
| X - 12221                                         | 0.565 | -0.570 | 0.216 | 0.008 | 0.109 |
| X - 12230                                         | 0.867 | -0.143 | 0.154 | 0.355 | 0.677 |
| X - 12261                                         | 3.165 | 1.152  | 0.879 | 0.190 | 0.522 |
| X - 12283                                         | 0.672 | -0.397 | 0.164 | 0.016 | 0.154 |

|           |       |        |       |       |       |
|-----------|-------|--------|-------|-------|-------|
| X - 12306 | 0.863 | -0.147 | 0.180 | 0.414 | 0.718 |
| X - 12329 | 0.663 | -0.411 | 0.190 | 0.031 | 0.229 |
| X - 12407 | 0.514 | -0.665 | 0.252 | 0.008 | 0.109 |
| X - 12410 | 0.777 | -0.253 | 0.177 | 0.155 | 0.474 |
| X - 12411 | 0.977 | -0.023 | 0.123 | 0.852 | 0.957 |
| X - 12456 | 1.378 | 0.320  | 0.186 | 0.084 | 0.361 |
| X - 12462 | 1.141 | 0.132  | 0.126 | 0.298 | 0.628 |
| X - 12472 | 0.841 | -0.174 | 0.205 | 0.397 | 0.702 |
| X - 12524 | 1.467 | 0.383  | 0.163 | 0.018 | 0.166 |
| X - 12543 | 1.016 | 0.016  | 0.251 | 0.949 | 0.975 |
| X - 12544 | 0.326 | -1.120 | 0.542 | 0.039 | 0.256 |
| X - 12680 | 1.205 | 0.186  | 0.142 | 0.190 | 0.522 |
| X - 12689 | 1.184 | 0.169  | 0.178 | 0.342 | 0.670 |
| X - 12718 | 0.828 | -0.188 | 0.158 | 0.233 | 0.553 |
| X - 12729 | 0.934 | -0.069 | 0.157 | 0.663 | 0.871 |
| X - 12730 | 0.802 | -0.221 | 0.163 | 0.176 | 0.497 |
| X - 12739 | 0.892 | -0.114 | 0.186 | 0.538 | 0.795 |
| X - 12740 | 0.962 | -0.038 | 0.161 | 0.812 | 0.933 |
| X - 12753 | 1.753 | 0.561  | 0.226 | 0.013 | 0.141 |
| X - 12812 | 0.755 | -0.281 | 0.178 | 0.115 | 0.412 |
| X - 12822 | 0.926 | -0.077 | 0.134 | 0.564 | 0.813 |
| X - 12844 | 1.059 | 0.057  | 0.133 | 0.665 | 0.871 |
| X - 12846 | 1.258 | 0.230  | 0.165 | 0.163 | 0.480 |
| X - 12847 | 0.950 | -0.051 | 0.164 | 0.753 | 0.912 |
| X - 12849 | 0.785 | -0.242 | 0.193 | 0.208 | 0.536 |
| X - 12851 | 1.051 | 0.050  | 0.177 | 0.779 | 0.924 |
| X - 12879 | 1.118 | 0.112  | 0.182 | 0.540 | 0.796 |
| X - 12906 | 0.755 | -0.281 | 0.169 | 0.097 | 0.384 |
| X - 13431 | 1.245 | 0.219  | 0.158 | 0.165 | 0.482 |
| X - 13507 | 0.730 | -0.314 | 0.192 | 0.101 | 0.391 |
| X - 13553 | 0.798 | -0.226 | 0.187 | 0.227 | 0.551 |
| X - 13658 | 1.230 | 0.207  | 0.180 | 0.250 | 0.577 |
| X - 13684 | 1.057 | 0.056  | 0.147 | 0.705 | 0.888 |

|           |       |        |       |       |       |
|-----------|-------|--------|-------|-------|-------|
| X - 13695 | 1.162 | 0.150  | 0.166 | 0.368 | 0.678 |
| X - 13737 | 1.042 | 0.041  | 0.157 | 0.793 | 0.926 |
| X - 13835 | 0.683 | -0.381 | 0.158 | 0.016 | 0.154 |
| X - 13844 | 0.791 | -0.235 | 0.236 | 0.320 | 0.650 |
| X - 13866 | 1.190 | 0.174  | 0.182 | 0.337 | 0.664 |
| X - 14056 | 1.336 | 0.290  | 0.147 | 0.049 | 0.286 |
| X - 14662 | 1.457 | 0.376  | 0.178 | 0.034 | 0.242 |
| X - 14939 | 0.993 | -0.007 | 0.165 | 0.965 | 0.983 |
| X - 15220 | 0.998 | -0.002 | 0.197 | 0.993 | 0.994 |
| X - 15245 | 1.294 | 0.258  | 0.175 | 0.140 | 0.447 |
| X - 15461 | 0.984 | -0.016 | 0.127 | 0.898 | 0.970 |
| X - 15469 | 1.096 | 0.092  | 0.137 | 0.503 | 0.769 |
| X - 15486 | 0.763 | -0.271 | 0.194 | 0.162 | 0.478 |
| X - 15492 | 1.448 | 0.370  | 0.192 | 0.054 | 0.289 |
| X - 15503 | 0.845 | -0.168 | 0.141 | 0.233 | 0.553 |
| X - 15664 | 0.863 | -0.148 | 0.163 | 0.364 | 0.678 |
| X - 15666 | 1.274 | 0.242  | 0.172 | 0.158 | 0.474 |
| X - 15728 | 1.071 | 0.068  | 0.170 | 0.687 | 0.882 |
| X - 16087 | 1.252 | 0.225  | 0.231 | 0.331 | 0.659 |
| X - 16124 | 0.900 | -0.105 | 0.181 | 0.561 | 0.812 |
| X - 16397 | 1.097 | 0.092  | 0.171 | 0.588 | 0.824 |
| X - 16570 | 0.778 | -0.251 | 0.154 | 0.104 | 0.394 |
| X - 16576 | 2.054 | 0.720  | 0.254 | 0.005 | 0.085 |
| X - 16580 | 1.094 | 0.090  | 0.160 | 0.576 | 0.821 |
| X - 16649 | 0.988 | -0.012 | 0.159 | 0.937 | 0.975 |
| X - 16654 | 1.084 | 0.081  | 0.180 | 0.655 | 0.868 |
| X - 16932 | 0.656 | -0.422 | 0.214 | 0.048 | 0.285 |
| X - 16935 | 1.185 | 0.170  | 0.186 | 0.362 | 0.678 |
| X - 16938 | 1.010 | 0.010  | 0.155 | 0.946 | 0.975 |
| X - 16944 | 1.156 | 0.145  | 0.178 | 0.416 | 0.718 |
| X - 16946 | 0.938 | -0.064 | 0.142 | 0.650 | 0.865 |
| X - 16964 | 1.302 | 0.264  | 0.165 | 0.110 | 0.407 |
| X - 17010 | 0.914 | -0.089 | 0.159 | 0.575 | 0.820 |

|           |       |        |       |       |       |
|-----------|-------|--------|-------|-------|-------|
| X - 17137 | 0.896 | -0.110 | 0.169 | 0.516 | 0.776 |
| X - 17145 | 0.987 | -0.013 | 0.168 | 0.939 | 0.975 |
| X - 17162 | 0.680 | -0.386 | 0.228 | 0.091 | 0.376 |
| X - 17185 | 1.162 | 0.150  | 0.190 | 0.429 | 0.731 |
| X - 17269 | 1.276 | 0.244  | 0.149 | 0.102 | 0.391 |
| X - 17325 | 1.152 | 0.141  | 0.232 | 0.543 | 0.798 |
| X - 17335 | 1.050 | 0.048  | 0.154 | 0.753 | 0.912 |
| X - 17337 | 1.452 | 0.373  | 0.170 | 0.028 | 0.215 |
| X - 17340 | 1.280 | 0.247  | 0.164 | 0.132 | 0.432 |
| X - 17351 | 0.791 | -0.235 | 0.148 | 0.112 | 0.409 |
| X - 17357 | 1.010 | 0.010  | 0.149 | 0.948 | 0.975 |
| X - 17359 | 1.492 | 0.400  | 0.171 | 0.019 | 0.167 |
| X - 17365 | 0.837 | -0.178 | 0.257 | 0.489 | 0.765 |
| X - 17367 | 1.369 | 0.314  | 0.245 | 0.199 | 0.529 |
| X - 17438 | 0.917 | -0.086 | 0.160 | 0.588 | 0.824 |
| X - 17612 | 1.049 | 0.048  | 0.152 | 0.753 | 0.912 |
| X - 17653 | 1.046 | 0.045  | 0.185 | 0.808 | 0.932 |
| X - 17654 | 0.984 | -0.016 | 0.162 | 0.922 | 0.973 |
| X - 17655 | 0.624 | -0.471 | 0.228 | 0.039 | 0.256 |
| X - 17673 | 0.532 | -0.632 | 0.213 | 0.003 | 0.067 |
| X - 17676 | 0.635 | -0.454 | 0.170 | 0.008 | 0.106 |
| X - 17685 | 0.709 | -0.343 | 0.182 | 0.059 | 0.303 |
| X - 18249 | 1.131 | 0.123  | 0.199 | 0.536 | 0.793 |
| X - 18345 | 0.950 | -0.051 | 0.167 | 0.758 | 0.912 |
| X - 18886 | 1.209 | 0.190  | 0.166 | 0.253 | 0.577 |
| X - 18888 | 0.832 | -0.184 | 0.137 | 0.178 | 0.498 |
| X - 18899 | 0.956 | -0.045 | 0.168 | 0.789 | 0.926 |
| X - 18901 | 0.947 | -0.055 | 0.114 | 0.630 | 0.854 |
| X - 18913 | 1.291 | 0.256  | 0.142 | 0.072 | 0.338 |
| X - 18914 | 1.073 | 0.070  | 0.180 | 0.697 | 0.886 |
| X - 18921 | 1.099 | 0.095  | 0.187 | 0.611 | 0.842 |
| X - 18922 | 1.354 | 0.303  | 0.182 | 0.095 | 0.381 |
| X - 19141 | 0.990 | -0.010 | 0.141 | 0.946 | 0.975 |

|           |       |        |       |       |       |
|-----------|-------|--------|-------|-------|-------|
| X - 19183 | 1.674 | 0.515  | 0.310 | 0.096 | 0.382 |
| X - 19438 | 1.193 | 0.177  | 0.172 | 0.303 | 0.632 |
| X - 21258 | 1.287 | 0.252  | 0.163 | 0.121 | 0.420 |
| X - 21295 | 0.775 | -0.255 | 0.180 | 0.157 | 0.474 |
| X - 21310 | 0.784 | -0.243 | 0.114 | 0.033 | 0.241 |
| X - 21315 | 0.665 | -0.407 | 0.328 | 0.214 | 0.540 |
| X - 21319 | 1.040 | 0.039  | 0.151 | 0.797 | 0.926 |
| X - 21339 | 1.398 | 0.335  | 0.244 | 0.169 | 0.485 |
| X - 21342 | 0.902 | -0.103 | 0.150 | 0.494 | 0.766 |
| X - 21353 | 1.014 | 0.014  | 0.136 | 0.916 | 0.973 |
| X - 21364 | 1.437 | 0.363  | 0.203 | 0.074 | 0.342 |
| X - 21410 | 1.726 | 0.546  | 0.179 | 0.002 | 0.057 |
| X - 21411 | 1.326 | 0.282  | 0.147 | 0.055 | 0.289 |
| X - 21441 | 1.352 | 0.302  | 0.164 | 0.065 | 0.321 |
| X - 21448 | 0.937 | -0.066 | 0.139 | 0.638 | 0.860 |
| X - 21467 | 1.299 | 0.261  | 0.169 | 0.122 | 0.420 |
| X - 21470 | 1.639 | 0.494  | 0.179 | 0.006 | 0.094 |
| X - 21471 | 1.296 | 0.259  | 0.147 | 0.077 | 0.346 |
| X - 21607 | 1.103 | 0.098  | 0.129 | 0.447 | 0.737 |
| X - 21661 | 1.164 | 0.152  | 0.175 | 0.385 | 0.692 |
| X - 21729 | 0.880 | -0.127 | 0.141 | 0.365 | 0.678 |
| X - 21733 | 0.519 | -0.657 | 0.209 | 0.002 | 0.051 |
| X - 21736 | 1.236 | 0.212  | 0.171 | 0.215 | 0.540 |
| X - 21792 | 1.031 | 0.031  | 0.144 | 0.831 | 0.943 |
| X - 21796 | 0.713 | -0.338 | 0.180 | 0.060 | 0.303 |
| X - 21803 | 0.531 | -0.632 | 0.256 | 0.013 | 0.142 |
| X - 21807 | 0.972 | -0.029 | 0.241 | 0.906 | 0.970 |
| X - 21821 | 0.722 | -0.326 | 0.160 | 0.042 | 0.265 |
| X - 21829 | 1.093 | 0.089  | 0.166 | 0.592 | 0.825 |
| X - 21834 | 0.867 | -0.143 | 0.160 | 0.372 | 0.678 |
| X - 21959 | 1.144 | 0.135  | 0.157 | 0.392 | 0.697 |
| X - 22143 | 1.169 | 0.156  | 0.170 | 0.357 | 0.678 |
| X - 22162 | 0.758 | -0.278 | 0.144 | 0.053 | 0.288 |



|           |       |        |       |       |       |
|-----------|-------|--------|-------|-------|-------|
| X - 22519 | 1.093 | 0.089  | 0.164 | 0.586 | 0.824 |
| X - 22520 | 1.408 | 0.342  | 0.212 | 0.107 | 0.398 |
| X - 22764 | 1.022 | 0.022  | 0.123 | 0.860 | 0.960 |
| X - 22771 | 1.472 | 0.386  | 0.167 | 0.021 | 0.176 |
| X - 22775 | 1.233 | 0.209  | 0.221 | 0.343 | 0.670 |
| X - 22776 | 1.129 | 0.121  | 0.129 | 0.347 | 0.675 |
| X - 22834 | 0.948 | -0.053 | 0.221 | 0.811 | 0.933 |
| X - 22918 | 0.782 | -0.245 | 0.304 | 0.419 | 0.718 |
| X - 23160 | 0.975 | -0.025 | 0.202 | 0.901 | 0.970 |
| X - 23196 | 1.156 | 0.145  | 0.144 | 0.314 | 0.647 |
| X - 23276 | 1.077 | 0.074  | 0.156 | 0.635 | 0.856 |
| X - 23294 | 1.004 | 0.004  | 0.232 | 0.985 | 0.990 |
| X - 23295 | 1.072 | 0.070  | 0.163 | 0.668 | 0.871 |
| X - 23296 | 0.774 | -0.257 | 0.215 | 0.233 | 0.553 |
| X - 23297 | 0.985 | -0.015 | 0.139 | 0.915 | 0.973 |
| X - 23314 | 1.122 | 0.115  | 0.129 | 0.371 | 0.678 |
| X - 23369 | 1.175 | 0.161  | 0.136 | 0.236 | 0.554 |
| X - 23498 | 0.955 | -0.046 | 0.150 | 0.761 | 0.912 |
| X - 23507 | 0.792 | -0.233 | 0.214 | 0.276 | 0.603 |
| X - 23583 | 0.760 | -0.274 | 0.267 | 0.305 | 0.634 |
| X - 23585 | 0.876 | -0.132 | 0.111 | 0.234 | 0.553 |
| X - 23587 | 1.131 | 0.123  | 0.182 | 0.498 | 0.766 |
| X - 23590 | 0.985 | -0.015 | 0.136 | 0.912 | 0.973 |
| X - 23593 | 0.936 | -0.066 | 0.126 | 0.599 | 0.830 |
| X - 23636 | 1.200 | 0.182  | 0.135 | 0.177 | 0.498 |
| X - 23639 | 0.985 | -0.015 | 0.118 | 0.901 | 0.970 |
| X - 23644 | 1.124 | 0.117  | 0.165 | 0.480 | 0.760 |
| X - 23648 | 0.997 | -0.003 | 0.164 | 0.983 | 0.990 |
| X - 23662 | 0.677 | -0.390 | 0.304 | 0.199 | 0.529 |
| X - 23665 | 1.044 | 0.043  | 0.181 | 0.813 | 0.933 |
| X - 23666 | 0.899 | -0.107 | 0.138 | 0.440 | 0.733 |
| X - 23680 | 1.237 | 0.213  | 0.165 | 0.199 | 0.529 |
| X - 23739 | 0.919 | -0.085 | 0.130 | 0.517 | 0.776 |

|           |       |        |       |       |       |
|-----------|-------|--------|-------|-------|-------|
| X - 23767 | 1.194 | 0.177  | 0.170 | 0.297 | 0.628 |
| X - 23780 | 1.124 | 0.117  | 0.204 | 0.568 | 0.816 |
| X - 23782 | 1.108 | 0.102  | 0.150 | 0.494 | 0.766 |
| X - 23787 | 1.418 | 0.349  | 0.283 | 0.217 | 0.543 |
| X - 23974 | 1.143 | 0.134  | 0.157 | 0.396 | 0.700 |
| X - 24077 | 1.053 | 0.051  | 0.161 | 0.749 | 0.912 |
| X - 24106 | 0.958 | -0.043 | 0.134 | 0.750 | 0.912 |
| X - 24243 | 1.123 | 0.116  | 0.163 | 0.476 | 0.760 |
| X - 24293 | 1.000 | 0.000  | 0.161 | 0.998 | 0.998 |
| X - 24295 | 1.212 | 0.193  | 0.140 | 0.168 | 0.482 |
| X - 24306 | 1.084 | 0.080  | 0.172 | 0.641 | 0.861 |
| X - 24307 | 1.076 | 0.073  | 0.171 | 0.667 | 0.871 |
| X - 24328 | 0.847 | -0.165 | 0.165 | 0.317 | 0.649 |
| X - 24337 | 1.130 | 0.122  | 0.135 | 0.367 | 0.678 |
| X - 24344 | 1.918 | 0.651  | 0.277 | 0.019 | 0.166 |
| X - 24411 | 0.797 | -0.227 | 0.216 | 0.294 | 0.626 |
| X - 24418 | 0.709 | -0.345 | 0.287 | 0.230 | 0.552 |
| X - 24422 | 0.974 | -0.026 | 0.157 | 0.868 | 0.966 |
| X - 24431 | 1.174 | 0.160  | 0.134 | 0.232 | 0.553 |
| X - 24432 | 0.769 | -0.263 | 0.211 | 0.213 | 0.539 |
| X - 24435 | 0.950 | -0.051 | 0.141 | 0.715 | 0.892 |
| X - 24455 | 1.017 | 0.017  | 0.135 | 0.899 | 0.970 |
| X - 24456 | 1.280 | 0.247  | 0.274 | 0.368 | 0.678 |
| X - 24473 | 0.949 | -0.053 | 0.140 | 0.706 | 0.888 |
| X - 24475 | 1.192 | 0.176  | 0.144 | 0.224 | 0.549 |
| X - 24518 | 0.681 | -0.385 | 0.178 | 0.031 | 0.229 |
| X - 24527 | 1.040 | 0.040  | 0.180 | 0.826 | 0.939 |
| X - 24540 | 1.100 | 0.095  | 0.188 | 0.614 | 0.842 |
| X - 24542 | 0.924 | -0.079 | 0.147 | 0.591 | 0.824 |
| X - 24544 | 1.240 | 0.215  | 0.165 | 0.193 | 0.523 |
| X - 24546 | 1.237 | 0.213  | 0.170 | 0.210 | 0.536 |
| X - 24549 | 1.034 | 0.033  | 0.154 | 0.830 | 0.943 |
| X - 24556 | 0.879 | -0.129 | 0.158 | 0.414 | 0.718 |

|           |       |        |       |       |       |
|-----------|-------|--------|-------|-------|-------|
| X - 24565 | 0.876 | -0.133 | 0.185 | 0.473 | 0.760 |
| X - 24588 | 1.444 | 0.367  | 0.166 | 0.027 | 0.212 |
| X - 24608 | 0.969 | -0.031 | 0.123 | 0.798 | 0.926 |
| X - 24637 | 1.080 | 0.077  | 0.157 | 0.623 | 0.850 |
| X - 24686 | 1.379 | 0.321  | 0.169 | 0.056 | 0.296 |
| X - 24699 | 0.806 | -0.215 | 0.171 | 0.207 | 0.535 |
| X - 24727 | 0.820 | -0.198 | 0.191 | 0.300 | 0.629 |
| X - 24728 | 1.213 | 0.193  | 0.172 | 0.260 | 0.586 |
| X - 24736 | 1.167 | 0.155  | 0.227 | 0.495 | 0.766 |
| X - 24748 | 1.045 | 0.044  | 0.167 | 0.794 | 0.926 |
| X - 24765 | 0.924 | -0.079 | 0.144 | 0.583 | 0.824 |
| X - 24812 | 1.219 | 0.198  | 0.177 | 0.264 | 0.590 |
| X - 24813 | 1.004 | 0.004  | 0.169 | 0.983 | 0.990 |
| X - 24849 | 0.957 | -0.044 | 0.144 | 0.759 | 0.912 |
| X - 24947 | 1.454 | 0.374  | 0.205 | 0.068 | 0.325 |
| X - 24949 | 1.234 | 0.210  | 0.142 | 0.137 | 0.442 |
| X - 24951 | 1.763 | 0.567  | 0.181 | 0.002 | 0.051 |
| X - 24952 | 1.178 | 0.164  | 0.141 | 0.246 | 0.574 |
| X - 24972 | 1.358 | 0.306  | 0.181 | 0.090 | 0.376 |
| X - 25172 | 1.061 | 0.059  | 0.145 | 0.686 | 0.882 |
| X - 25220 | 1.438 | 0.363  | 0.224 | 0.105 | 0.397 |
| X - 25265 | 0.795 | -0.230 | 0.148 | 0.121 | 0.420 |
| X - 25266 | 1.108 | 0.102  | 0.155 | 0.509 | 0.771 |
| X - 25267 | 0.959 | -0.042 | 0.137 | 0.757 | 0.912 |
| X - 25271 | 0.870 | -0.139 | 0.153 | 0.363 | 0.678 |
| X - 25279 | 1.151 | 0.140  | 0.157 | 0.372 | 0.678 |
| X - 25343 | 0.968 | -0.032 | 0.157 | 0.837 | 0.946 |
| X - 25371 | 1.080 | 0.077  | 0.142 | 0.591 | 0.824 |
| X - 25388 | 1.147 | 0.137  | 0.192 | 0.476 | 0.760 |
| X - 25419 | 0.754 | -0.283 | 0.214 | 0.186 | 0.514 |
| X - 25420 | 0.961 | -0.040 | 0.169 | 0.813 | 0.933 |
| X - 25422 | 1.172 | 0.159  | 0.177 | 0.371 | 0.678 |
| X - 25463 | 1.106 | 0.100  | 0.136 | 0.462 | 0.751 |

|                            |       |       |       |       |       |
|----------------------------|-------|-------|-------|-------|-------|
| xanthine                   | 1.364 | 0.310 | 0.154 | 0.044 | 0.270 |
| xanthurenate               | 1.163 | 0.151 | 0.154 | 0.327 | 0.659 |
| ximenoylcarnitine (C26:1)* | 1.748 | 0.559 | 0.247 | 0.024 | 0.194 |
| xylose                     | 1.316 | 0.274 | 0.162 | 0.090 | 0.376 |

---

**Supplementary Table 6. Genetic associations of BMI with metabolic biomarkers**

| Biochemical                                             | IPD     |       |         |       | IVW     |       |         |       | Cochran's Q | MR-Egger |       | Weighted median |       |
|---------------------------------------------------------|---------|-------|---------|-------|---------|-------|---------|-------|-------------|----------|-------|-----------------|-------|
|                                                         | $\beta$ | SE    | p-value | p-BH  | $\beta$ | SE    | p-value | p-BH  |             | $\beta$  | SE    | $\beta$         | SE    |
| 1-(1-enyl-palmitoyl)-2-linoleoyl-GPC (P-16:0/18:2)*     | -0.420  | 0.798 | 0.599   | 0.903 | -0.048  | 0.052 | 0.056   | 0.182 | 0.556       | -0.042   | 0.401 | -0.030          | 0.141 |
| 1-(1-enyl-palmitoyl)-2-oleoyl-GPC (P-16:0/18:1)*        | -0.429  | 0.835 | 0.608   | 0.906 | -0.088  | 0.054 | 0.032   | 0.128 | 0.352       | -0.082   | 0.404 | -0.097          | 0.142 |
| 1-(1-enyl-palmitoyl)-2-palmitoleoyl-GPC (P-16:0/16:1)*  | 0.305   | 0.916 | 0.739   | 0.949 | -0.040  | 0.059 | 0.839   | 0.927 | 0.556       | -0.130   | 0.431 | -0.041          | 0.151 |
| 1,5-anhydroglucitol (1,5-AG)                            | -1.150  | 0.877 | 0.193   | 0.652 | 0.050   | 0.057 | 0.437   | 0.648 | 0.040       | -0.074   | 0.416 | 0.362           | 0.525 |
| 1-arachidonylglycerol (20:4)                            | -0.441  | 0.897 | 0.624   | 0.918 | -0.014  | 0.058 | 0.300   | 0.517 | 0.480       | -0.061   | 0.462 | 0.030           | 0.164 |
| 1-carboxyethylisoleucine                                | 2.020   | 1.026 | 0.051   | 0.470 | 0.367   | 0.065 | 0.000   | 0.003 | 0.750       | 0.212    | 0.469 | 0.545           | 0.167 |
| 1-carboxyethylleucine                                   | 2.200   | 0.942 | 0.021   | 0.470 | 0.277   | 0.060 | 0.000   | 0.004 | 0.917       | 0.153    | 0.440 | 0.393           | 0.153 |
| 1-carboxyethylphenylalanine                             | 2.090   | 0.828 | 0.013   | 0.470 | 0.256   | 0.055 | 0.001   | 0.017 | 0.917       | 0.123    | 0.399 | 0.369           | 0.140 |
| 1-carboxyethylvaline                                    | 1.760   | 0.826 | 0.035   | 0.470 | 0.317   | 0.054 | 0.000   | 0.000 | 0.657       | 0.074    | 0.400 | 0.521           | 0.141 |
| 1-linolenoylglycerol (18:3)                             | -0.816  | 0.792 | 0.305   | 0.739 | -0.002  | 0.052 | 0.867   | 0.942 | 0.556       | -0.016   | 0.394 | 0.042           | 0.137 |
| 1-linoleoylglycerol (18:2)                              | -0.369  | 0.811 | 0.650   | 0.930 | 0.045   | 0.053 | 0.713   | 0.858 | 0.412       | 0.056    | 0.407 | 0.074           | 0.143 |
| 1-linoleoyl-GPG (18:2)*                                 | 0.800   | 0.744 | 0.284   | 0.731 | 0.129   | 0.048 | 0.038   | 0.145 | 0.833       | 0.137    | 0.365 | 0.183           | 0.128 |
| 1-methylhistidine                                       | 0.560   | 0.853 | 0.513   | 0.860 | 0.182   | 0.056 | 0.043   | 0.151 | 0.836       | 0.053    | 0.391 | 0.319           | 0.137 |
| 1-methylurate                                           | 0.234   | 0.844 | 0.782   | 0.962 | 0.207   | 0.056 | 0.042   | 0.151 | 0.742       | -0.015   | 0.402 | 0.514           | 0.602 |
| 1-myristoyl-2-arachidonoyl-GPC (14:0/20:4)*             | -0.879  | 0.865 | 0.312   | 0.744 | 0.126   | 0.057 | 0.012   | 0.073 | 0.873       | -0.078   | 0.425 | 0.337           | 0.149 |
| 1-myristoyl-2-palmitoyl-GPC (14:0/16:0)                 | 0.316   | 0.840 | 0.707   | 0.946 | 0.211   | 0.055 | 0.000   | 0.005 | 0.833       | -0.020   | 0.424 | 0.408           | 0.149 |
| 1-oleoyl-2-docosahexaenoyl-GPC (18:1/22:6)*             | -1.000  | 0.880 | 0.257   | 0.705 | -0.064  | 0.058 | 0.614   | 0.786 | 0.283       | -0.134   | 0.410 | -0.073          | 0.144 |
| 1-oleoylglycerol (18:1)                                 | 0.497   | 0.796 | 0.533   | 0.866 | 0.122   | 0.052 | 0.174   | 0.375 | 0.833       | 0.036    | 0.412 | 0.228           | 0.145 |
| 1-palmitoleoylglycerol (16:1)*                          | 0.263   | 0.899 | 0.770   | 0.962 | 0.195   | 0.057 | 0.003   | 0.027 | 0.944       | -0.041   | 0.442 | 0.391           | 0.155 |
| 1-palmitoyl-2-arachidonoyl-GPC (16:0/20:4n6)            | -0.598  | 0.856 | 0.486   | 0.849 | 0.027   | 0.057 | 0.612   | 0.786 | 0.394       | -0.166   | 0.427 | 0.107           | 0.149 |
| 1-palmitoyl-2-dihomo-linolenoyl-GPC (16:0/20:3n3 or 6)* | 0.095   | 0.816 | 0.908   | 0.987 | 0.170   | 0.053 | 0.000   | 0.007 | 0.949       | -0.050   | 0.391 | 0.278           | 0.137 |

|                                                  |        |       |       |       |        |       |       |       |        |        |       |        |       |
|--------------------------------------------------|--------|-------|-------|-------|--------|-------|-------|-------|--------|--------|-------|--------|-------|
| 1-palmitoyl-2-linoleoyl-GPC (16:0/18:2)          | -0.775 | 0.862 | 0.370 | 0.778 | 0.108  | 0.056 | 0.074 | 0.220 | 0.833  | 0.106  | 0.416 | 0.196  | 0.146 |
| 1-palmitoyl-2-oleoyl-GPE (16:0/18:1)             | 1.560  | 0.827 | 0.062 | 0.487 | 0.256  | 0.055 | 0.000 | 0.007 | 0.610  | 0.038  | 0.405 | 0.413  | 0.142 |
| 1-palmitoyl-2-palmitoleoyl-GPC (16:0/16:1)*      | 0.121  | 0.767 | 0.874 | 0.986 | 0.261  | 0.051 | 0.000 | 0.000 | 0.348  | -0.059 | 0.392 | 0.518  | 0.139 |
| 1-palmitoyl-2-stearoyl-GPE (16:0/18:0)*          | 1.140  | 0.991 | 0.253 | 0.705 | 0.272  | 0.064 | 0.084 | 0.240 | 0.836  | 0.065  | 0.460 | 0.447  | 0.163 |
| 1-stearoyl-2-arachidonoyl-GPC (18:0/20:4)        | -0.524 | 0.882 | 0.554 | 0.877 | 0.014  | 0.059 | 0.957 | 0.983 | 0.556  | -0.203 | 0.430 | 0.082  | 0.151 |
| 1-stearoyl-2-arachidonoyl-GPE (18:0/20:4)        | 0.528  | 0.849 | 0.535 | 0.866 | 0.206  | 0.056 | 0.026 | 0.115 | 0.937  | -0.012 | 0.429 | 0.388  | 0.151 |
| 1-stearoyl-2-arachidonoyl-GPI (18:0/20:4)        | -0.659 | 0.885 | 0.458 | 0.827 | 0.132  | 0.056 | 0.210 | 0.421 | 0.945  | -0.021 | 0.437 | 0.258  | 0.154 |
| 1-stearoyl-2-docosahexaenoyl-GPE (18:0/22:6)*    | 0.091  | 0.800 | 0.909 | 0.987 | 0.126  | 0.053 | 0.379 | 0.594 | 0.750  | 0.116  | 0.391 | 0.206  | 0.137 |
| 1-stearoyl-2-linoleoyl-GPE (18:0/18:2)*          | 0.649  | 0.887 | 0.465 | 0.835 | 0.269  | 0.057 | 0.001 | 0.017 | 0.663  | 0.121  | 0.429 | 0.469  | 0.151 |
| 1-stearoyl-2-oleoyl-GPE (18:0/18:1)              | 1.450  | 0.854 | 0.092 | 0.527 | 0.232  | 0.055 | 0.005 | 0.038 | 0.951  | 0.070  | 0.412 | 0.373  | 0.144 |
| 1-stearoyl-2-oleoyl-GPS (18:0/18:1)              | 1.800  | 0.935 | 0.056 | 0.483 | 0.085  | 0.059 | 0.903 | 0.960 | 0.412  | 0.018  | 0.453 | 0.068  | 0.160 |
| 2,3-dihydroxy-5-methylthio-4-pentenoate (DMTPA)* | 2.150  | 0.856 | 0.013 | 0.470 | 0.351  | 0.058 | 0.000 | 0.001 | 0.556  | 0.171  | 0.405 | 0.511  | 0.143 |
| 2-aminoadipate                                   | -0.026 | 1.440 | 0.986 | 0.994 | 0.290  | 0.086 | 0.030 | 0.123 | <0.001 | 0.000  | 0.010 | 0.003  | 0.738 |
| 2-aminoheptanoate                                | 0.340  | 0.858 | 0.693 | 0.940 | 0.106  | 0.056 | 0.290 | 0.506 | 0.836  | 0.071  | 0.427 | 0.144  | 0.150 |
| 2-hydroxyarachidate*                             | 0.115  | 0.873 | 0.895 | 0.986 | 0.042  | 0.056 | 0.477 | 0.683 | 0.674  | 0.064  | 0.421 | 0.082  | 0.148 |
| 2-hydroxybehenate                                | -0.162 | 0.767 | 0.833 | 0.973 | 0.099  | 0.048 | 0.168 | 0.370 | 0.982  | 0.104  | 0.419 | 0.230  | 0.148 |
| 2-hydroxyphenylacetate                           | 1.910  | 0.966 | 0.051 | 0.470 | 0.244  | 0.064 | 0.079 | 0.230 | 0.873  | 0.064  | 0.460 | 0.341  | 0.159 |
| 2-linoleoylglycerol (18:2)                       | -0.273 | 0.877 | 0.756 | 0.959 | 0.030  | 0.056 | 0.976 | 0.987 | 0.663  | 0.047  | 0.434 | 0.065  | 0.151 |
| 2-methylbutyrylcarnitine (C5)                    | 1.190  | 0.869 | 0.172 | 0.631 | 0.277  | 0.057 | 0.000 | 0.005 | 0.686  | 0.115  | 0.434 | 0.484  | 0.156 |
| 2-oxoarginine*                                   | 1.400  | 0.854 | 0.103 | 0.529 | 0.146  | 0.054 | 0.071 | 0.216 | 0.695  | 0.067  | 0.428 | 0.255  | 0.150 |
| 3beta-hydroxy-5-cholestenoate                    | -0.682 | 0.798 | 0.394 | 0.791 | -0.079 | 0.052 | 0.207 | 0.419 | 0.512  | -0.025 | 0.391 | -0.030 | 0.138 |
| 3b-hydroxy-5-cholenoic acid                      | 0.518  | 1.174 | 0.660 | 0.935 | -0.071 | 0.073 | 0.794 | 0.905 | 0.676  | 0.213  | 0.523 | -0.141 | 0.182 |
| 3-hydroxy-2-ethylpropionate                      | 1.910  | 0.916 | 0.039 | 0.470 | 0.172  | 0.062 | 0.003 | 0.029 | 0.556  | 0.148  | 0.426 | 0.206  | 0.150 |
| 3-hydroxyisobutyrate                             | 1.550  | 0.921 | 0.096 | 0.529 | 0.184  | 0.060 | 0.006 | 0.044 | 0.873  | 0.009  | 0.453 | 0.322  | 0.158 |

|                                             |        |       |       |       |        |           |       |           |       |        |       |        |       |
|---------------------------------------------|--------|-------|-------|-------|--------|-----------|-------|-----------|-------|--------|-------|--------|-------|
| 3-methyl-2-oxovalerate                      | 1.250  | 0.884 | 0.161 | 0.619 | 0.224  | 0.05<br>9 | 0.001 | 0.01<br>4 | 0.917 | 0.080  | 0.440 | 0.312  | 0.155 |
| 4-cholesten-3-one                           | -0.989 | 0.801 | 0.219 | 0.685 | 0.176  | 0.05<br>1 | 0.008 | 0.05<br>3 | 0.979 | -0.041 | 0.417 | 0.366  | 0.144 |
| 4-guanidinobutanoate                        | 1.640  | 0.774 | 0.035 | 0.470 | 0.092  | 0.05<br>2 | 0.266 | 0.48<br>6 | 0.556 | 0.045  | 0.399 | 0.103  | 0.140 |
| 4-hydroxyglutamate                          | 1.490  | 0.787 | 0.061 | 0.487 | 0.144  | 0.05<br>4 | 0.033 | 0.13<br>2 | 0.556 | 0.034  | 0.402 | 0.222  | 0.139 |
| 5-hydroxylysine                             | 1.460  | 0.864 | 0.093 | 0.527 | 0.013  | 0.05<br>7 | 0.586 | 0.77<br>1 | 0.348 | 0.075  | 0.429 | -0.024 | 0.151 |
| 5-methylthioadenosine (MTA)                 | 1.580  | 0.800 | 0.050 | 0.470 | 0.264  | 0.05<br>2 | 0.023 | 0.10<br>6 | 0.436 | 0.168  | 0.434 | 0.484  | 0.153 |
| 6-oxopiperidine-2-carboxylate               | 0.530  | 0.962 | 0.582 | 0.895 | 0.124  | 0.06<br>1 | 0.388 | 0.60<br>4 | 0.836 | 0.119  | 0.448 | 0.210  | 0.156 |
| alanine                                     | 0.546  | 0.860 | 0.527 | 0.865 | 0.128  | 0.05<br>9 | 0.043 | 0.15<br>1 | 0.945 | -0.036 | 0.428 | 0.226  | 0.150 |
| arabinose                                   | 1.380  | 1.090 | 0.207 | 0.666 | -0.034 | 0.06<br>6 | 0.010 | 0.06<br>6 | 0.244 | 0.094  | 0.498 | -0.811 | 0.638 |
| argininate*                                 | 0.400  | 0.884 | 0.651 | 0.930 | 0.206  | 0.05<br>8 | 0.026 | 0.11<br>4 | 0.814 | 0.026  | 0.420 | 0.393  | 0.147 |
| aspartate                                   | 2.070  | 0.788 | 0.009 | 0.470 | 0.062  | 0.05<br>2 | 0.347 | 0.55<br>9 | 0.417 | 0.146  | 0.398 | 0.009  | 0.140 |
| behenoyl dihydrosphingomyelin (d18:0/22:0)* | -0.864 | 0.810 | 0.288 | 0.733 | 0.111  | 0.05<br>4 | 0.191 | 0.39<br>8 | 0.556 | -0.076 | 0.409 | 0.280  | 0.144 |
| beta-alanine                                | 1.790  | 0.837 | 0.034 | 0.470 | 0.093  | 0.05<br>5 | 0.672 | 0.82<br>9 | 0.512 | 0.150  | 0.431 | -0.096 | 0.429 |
| beta-citrylglutamate                        | 1.380  | 0.801 | 0.087 | 0.526 | 0.203  | 0.05<br>3 | 0.010 | 0.06<br>2 | 0.873 | 0.079  | 0.424 | 0.337  | 0.149 |
| beta-hydroxyisovalerate                     | 0.640  | 0.835 | 0.444 | 0.823 | 0.232  | 0.05<br>6 | 0.071 | 0.21<br>7 | 0.917 | 0.103  | 0.379 | 0.329  | 0.133 |
| betaine                                     | 0.019  | 0.787 | 0.981 | 0.993 | 0.021  | 0.05<br>3 | 0.500 | 0.70<br>3 | 0.263 | -0.065 | 0.405 | 0.077  | 0.142 |
| bilirubin                                   | -0.418 | 0.891 | 0.640 | 0.923 | -0.123 | 0.05<br>9 | 0.205 | 0.41<br>7 | 0.873 | 0.005  | 0.422 | -0.116 | 0.438 |
| bilirubin (E,E)*                            | 0.088  | 0.867 | 0.920 | 0.987 | -0.168 | 0.05<br>7 | 0.189 | 0.39<br>5 | 0.917 | 0.095  | 0.435 | -0.094 | 0.456 |
| bilirubin (E,Z or Z,E)*                     | -0.297 | 0.887 | 0.738 | 0.949 | -0.138 | 0.05<br>9 | 0.142 | 0.33<br>1 | 0.896 | 0.038  | 0.426 | -0.167 | 0.445 |
| biliverdin                                  | -0.647 | 0.815 | 0.429 | 0.818 | -0.156 | 0.05<br>3 | 0.040 | 0.14<br>7 | 0.975 | 0.032  | 0.407 | -0.142 | 0.476 |
| butyrylcarnitine (C4)                       | 1.270  | 0.833 | 0.128 | 0.570 | 0.142  | 0.05<br>7 | 0.020 | 0.10<br>1 | 0.833 | 0.005  | 0.429 | 0.221  | 0.150 |
| carotene diol (2)                           | -2.460 | 0.811 | 0.003 | 0.297 | -0.128 | 0.05<br>6 | 0.088 | 0.24<br>4 | 0.676 | -0.119 | 0.417 | -0.366 | 0.481 |
| ceramide (d16:1/24:1, d18:1/22:1)*          | 0.431  | 0.602 | 0.476 | 0.839 | 0.095  | 0.04<br>1 | 0.262 | 0.48<br>2 | 0.917 | 0.042  | 0.285 | 0.208  | 0.104 |
| ceramide (d18:1/17:0, d17:1/18:0)*          | -0.997 | 0.916 | 0.278 | 0.726 | 0.164  | 0.06<br>1 | 0.141 | 0.33<br>1 | 0.886 | 0.034  | 0.426 | 0.324  | 0.151 |

|                                                                    |        |       |       |       |        |           |       |           |        |        |       |        |       |
|--------------------------------------------------------------------|--------|-------|-------|-------|--------|-----------|-------|-----------|--------|--------|-------|--------|-------|
| ceramide (d18:1/20:0, d16:1/22:0, d20:1/18:0)*                     | 0.183  | 0.837 | 0.827 | 0.973 | 0.241  | 0.05<br>4 | 0.000 | 0.00<br>5 | 0.556  | 0.052  | 0.399 | 0.467  | 0.140 |
| cortisol                                                           | -0.328 | 0.871 | 0.707 | 0.946 | 0.094  | 0.05<br>7 | 0.197 | 0.40<br>7 | 0.057  | -0.154 | 0.428 | 0.228  | 0.150 |
| cortisone                                                          | -0.444 | 0.958 | 0.644 | 0.925 | 0.059  | 0.06<br>0 | 0.166 | 0.36<br>6 | 0.080  | -0.145 | 0.446 | 0.117  | 0.156 |
| cystathionine                                                      | 1.220  | 0.790 | 0.123 | 0.558 | 0.260  | 0.05<br>1 | 0.000 | 0.00<br>0 | 0.556  | 0.188  | 0.393 | 0.427  | 0.138 |
| cysteine-glutathione disulfide                                     | 0.444  | 0.879 | 0.614 | 0.911 | -0.228 | 0.05<br>5 | 0.022 | 0.10<br>6 | 0.525  | -0.033 | 0.428 | -0.472 | 0.150 |
| diacylglycerol (14:0/18:1, 16:0/16:1) [2]*                         | 0.049  | 1.192 | 0.967 | 0.993 | 0.273  | 0.07<br>2 | 0.033 | 0.13<br>0 | 0.556  | -0.007 | 0.534 | 0.528  | 0.188 |
| diacylglycerol (16:1/18:2 [2], 16:0/18:3 [1])*                     | -0.238 | 0.954 | 0.803 | 0.970 | 0.153  | 0.06<br>0 | 0.007 | 0.04<br>7 | 0.833  | -0.062 | 0.478 | 0.312  | 0.168 |
| dimethylglycine                                                    | 0.782  | 0.857 | 0.363 | 0.777 | 0.111  | 0.05<br>8 | 0.030 | 0.12<br>4 | 0.514  | 0.175  | 0.407 | 0.041  | 0.143 |
| ergothioneine                                                      | -0.387 | 0.809 | 0.633 | 0.922 | -0.097 | 0.05<br>2 | 0.170 | 0.37<br>3 | 0.150  | 0.003  | 0.401 | -0.253 | 0.397 |
| erythritol                                                         | 1.920  | 0.913 | 0.037 | 0.470 | 0.134  | 0.06<br>1 | 0.459 | 0.66<br>6 | 0.676  | 0.095  | 0.426 | -0.049 | 0.456 |
| formiminoglutamate                                                 | 1.750  | 0.820 | 0.034 | 0.470 | 0.297  | 0.05<br>4 | 0.000 | 0.00<br>8 | 0.944  | 0.186  | 0.387 | 0.435  | 0.136 |
| gamma-glutamyl-alpha-lysine                                        | 0.073  | 0.853 | 0.932 | 0.992 | 0.236  | 0.05<br>7 | 0.000 | 0.00<br>5 | 0.563  | 0.060  | 0.399 | 0.430  | 0.141 |
| gamma-glutamylglutamate                                            | 1.320  | 0.803 | 0.102 | 0.529 | 0.141  | 0.05<br>3 | 0.011 | 0.07<br>0 | 0.556  | 0.068  | 0.371 | 0.173  | 0.130 |
| gamma-glutamylglycine                                              | -0.382 | 0.913 | 0.676 | 0.940 | 0.063  | 0.05<br>8 | 0.085 | 0.24<br>1 | 0.145  | 0.032  | 0.437 | 0.125  | 0.154 |
| gamma-glutamylisoleucine*                                          | 1.840  | 0.837 | 0.029 | 0.470 | 0.373  | 0.05<br>6 | 0.000 | 0.00<br>0 | 0.873  | 0.199  | 0.390 | 0.504  | 0.137 |
| gamma-glutamylleucine                                              | 0.876  | 0.848 | 0.304 | 0.739 | 0.360  | 0.05<br>6 | 0.000 | 0.00<br>0 | 0.750  | 0.167  | 0.392 | 0.563  | 0.138 |
| gamma-glutamylphenylalanine                                        | 2.120  | 0.898 | 0.020 | 0.470 | 0.310  | 0.05<br>9 | 0.001 | 0.00<br>9 | 0.869  | 0.218  | 0.412 | 0.432  | 0.144 |
| gamma-glutamyltyrosine                                             | 1.200  | 0.807 | 0.139 | 0.589 | 0.286  | 0.05<br>4 | 0.001 | 0.01<br>1 | 0.512  | 0.095  | 0.408 | 0.504  | 0.144 |
| gamma-glutamylvaline                                               | 1.300  | 0.825 | 0.118 | 0.550 | 0.286  | 0.05<br>5 | 0.000 | 0.00<br>1 | 0.952  | 0.074  | 0.380 | 0.430  | 0.134 |
| gamma-tocopherol/beta-tocopherol                                   | -0.867 | 0.720 | 0.231 | 0.694 | 0.110  | 0.04<br>8 | 0.215 | 0.43<br>0 | 0.944  | 0.093  | 0.356 | 0.281  | 0.464 |
| glucose                                                            | 1.330  | 0.881 | 0.132 | 0.580 | 0.044  | 0.05<br>9 | 0.013 | 0.07<br>6 | 0.380  | 0.104  | 0.427 | 0.620  | 0.659 |
| glucuronide of C <sub>10</sub> H <sub>18</sub> O <sub>2</sub> (7)* | 1.410  | NA    | NA    | NA    | 0.029  | 0.04<br>6 | 0.560 | 0.75<br>3 | <0.001 | 0.000  | 0.001 | -0.091 | 1.260 |
| glutamate                                                          | 1.520  | 0.828 | 0.068 | 0.492 | 0.195  | 0.05<br>3 | 0.001 | 0.01<br>6 | 0.556  | 0.123  | 0.386 | 0.280  | 0.136 |
| glycine                                                            | -0.542 | 0.875 | 0.536 | 0.866 | -0.069 | 0.05<br>6 | 0.639 | 0.80<br>4 | 0.480  | 0.021  | 0.442 | -0.099 | 0.155 |



|                                                                |        |       |       |       |        |       |       |       |       |        |       |        |       |
|----------------------------------------------------------------|--------|-------|-------|-------|--------|-------|-------|-------|-------|--------|-------|--------|-------|
| glycosyl-N-(2-hydroxynervonoyl)-sphingosine (d18:1/24:1(2OH))* | 0.579  | 0.613 | 0.347 | 0.777 | 0.099  | 0.039 | 0.718 | 0.860 | 0.836 | 0.040  | 0.319 | 0.157  | 0.112 |
| glycosyl-N-nervonoyl-sphingosine (d18:1/24:1)*                 | 0.086  | 0.548 | 0.875 | 0.986 | 0.002  | 0.036 | 0.081 | 0.235 | 0.348 | -0.071 | 0.271 | 0.002  | 0.095 |
| gulonate*                                                      | 1.920  | 0.907 | 0.036 | 0.470 | 0.327  | 0.061 | 0.000 | 0.002 | 0.559 | 0.101  | 0.419 | 0.869  | 0.781 |
| hexadecasphingosine (d16:1)*                                   | 0.462  | 0.878 | 0.600 | 0.903 | 0.122  | 0.054 | 0.047 | 0.161 | 0.814 | 0.061  | 0.409 | 0.235  | 0.140 |
| homoarginine                                                   | 1.300  | 0.886 | 0.144 | 0.589 | 0.097  | 0.058 | 0.548 | 0.745 | 0.556 | -0.012 | 0.417 | 0.133  | 0.147 |
| homocitrulline                                                 | 1.290  | 0.953 | 0.179 | 0.640 | 0.152  | 0.064 | 0.018 | 0.094 | 0.776 | 0.114  | 0.438 | 0.185  | 0.154 |
| hydantoin-5-propionate                                         | 1.400  | 1.017 | 0.172 | 0.631 | 0.215  | 0.064 | 0.250 | 0.470 | 0.917 | 0.179  | 0.445 | 0.300  | 0.157 |
| hydroxyasparagine                                              | 1.060  | 0.851 | 0.215 | 0.679 | 0.153  | 0.057 | 0.065 | 0.205 | 0.917 | 0.056  | 0.397 | 0.201  | 0.140 |
| isoleucine                                                     | 1.690  | 0.930 | 0.071 | 0.495 | 0.273  | 0.062 | 0.001 | 0.009 | 0.873 | 0.197  | 0.445 | 0.359  | 0.156 |
| isovalerate (C5)                                               | 1.170  | 0.842 | 0.167 | 0.628 | 0.282  | 0.055 | 0.045 | 0.156 | 0.763 | 0.044  | 0.428 | 0.506  | 0.151 |
| isovalerylcarnitine (C5)                                       | 0.881  | 0.884 | 0.321 | 0.749 | 0.166  | 0.058 | 0.299 | 0.517 | 0.706 | 0.077  | 0.427 | 0.295  | 0.150 |
| lactosyl-N-nervonoyl-sphingosine (d18:1/24:1)*                 | 0.321  | 0.681 | 0.638 | 0.922 | -0.021 | 0.043 | 0.127 | 0.314 | 0.480 | -0.024 | 0.330 | -0.037 | 0.116 |
| lactosyl-N-palmitoyl-sphingosine (d18:1/16:0)                  | 0.046  | 0.795 | 0.953 | 0.993 | 0.004  | 0.052 | 0.106 | 0.279 | 0.612 | 0.004  | 0.419 | -0.069 | 0.148 |
| leucine                                                        | 1.110  | 0.904 | 0.223 | 0.685 | 0.249  | 0.061 | 0.001 | 0.011 | 0.873 | 0.148  | 0.430 | 0.373  | 0.151 |
| linoleoyl-arachidonoyl-glycerol (18:2/20:4) [1]*               | -0.271 | 0.823 | 0.742 | 0.949 | 0.088  | 0.053 | 0.289 | 0.506 | 0.436 | -0.058 | 0.400 | 0.163  | 0.140 |
| linoleoyl-arachidonoyl-glycerol (18:2/20:4) [2]*               | -0.017 | 0.813 | 0.984 | 0.993 | 0.058  | 0.052 | 0.296 | 0.515 | 0.273 | -0.003 | 0.405 | 0.127  | 0.142 |
| linoleoyl-docosahexaenoyl-glycerol (18:2/22:6) [2]*            | -0.168 | 0.740 | 0.821 | 0.972 | -0.034 | 0.045 | 0.444 | 0.654 | 0.188 | -0.033 | 0.375 | -0.046 | 0.131 |
| linoleoyl-linolenoyl-glycerol (18:2/18:3) [2]*                 | -0.348 | 0.841 | 0.679 | 0.940 | -0.006 | 0.052 | 0.556 | 0.749 | 0.173 | 0.014  | 0.382 | -0.044 | 0.131 |
| linoleoyl-linoleoyl-glycerol (18:2/18:2) [1]*                  | -0.028 | 0.701 | 0.968 | 0.993 | 0.004  | 0.045 | 0.861 | 0.939 | 0.273 | 0.063  | 0.349 | -0.056 | 0.122 |
| lysine                                                         | -0.376 | 0.898 | 0.676 | 0.940 | 0.066  | 0.060 | 0.026 | 0.115 | 0.833 | 0.035  | 0.411 | 0.166  | 0.145 |
| mannitol/sorbitol                                              | 1.690  | 0.866 | 0.053 | 0.483 | 0.162  | 0.058 | 0.021 | 0.102 | 0.917 | -0.088 | 0.398 | 0.352  | 0.538 |
| mannonate*                                                     | 1.750  | 0.909 | 0.056 | 0.483 | 0.249  | 0.060 | 0.000 | 0.005 | 0.917 | 0.151  | 0.427 | 0.709  | 0.734 |
| mannose                                                        | 0.847  | 0.912 | 0.355 | 0.777 | -0.042 | 0.061 | 0.537 | 0.737 | 0.057 | 0.038  | 0.428 | -0.127 | 0.446 |
| myristoyl dihydrosphingomyelin (d18:0/14:0)*                   | -0.894 | 0.835 | 0.286 | 0.732 | 0.166  | 0.056 | 0.004 | 0.032 | 0.873 | -0.152 | 0.404 | 0.369  | 0.142 |

|                                               |        |       |       |       |        |           |       |           |       |        |       |       |       |
|-----------------------------------------------|--------|-------|-------|-------|--------|-----------|-------|-----------|-------|--------|-------|-------|-------|
| myristoyl-linoleoyl-glycerol (14:0/18:2) [1]* | 0.285  | 0.934 | 0.761 | 0.961 | 0.180  | 0.06<br>1 | 0.037 | 0.14<br>2 | 0.978 | 0.067  | 0.471 | 0.322 | 0.168 |
| N6,N6,N6-trimethyllysine                      | 0.745  | 0.873 | 0.395 | 0.791 | 0.216  | 0.05<br>6 | 0.001 | 0.01<br>1 | 0.882 | 0.066  | 0.417 | 0.356 | 0.146 |
| N-acetylalanine                               | 0.295  | 0.888 | 0.741 | 0.949 | 0.161  | 0.05<br>8 | 0.179 | 0.38<br>2 | 0.949 | 0.102  | 0.430 | 0.268 | 0.151 |
| N-acetylcarnosine                             | -0.264 | 0.719 | 0.714 | 0.946 | -0.015 | 0.04<br>5 | 0.406 | 0.61<br>9 | 0.080 | 0.036  | 0.351 | 0.016 | 0.123 |
| N-acetylglutamate                             | 0.590  | 0.785 | 0.454 | 0.823 | 0.169  | 0.05<br>1 | 0.554 | 0.74<br>9 | 0.975 | 0.051  | 0.377 | 0.265 | 0.131 |
| N-acetylglycine                               | -0.642 | 0.794 | 0.420 | 0.810 | 0.108  | 0.05<br>2 | 0.033 | 0.13<br>0 | 0.040 | 0.052  | 0.415 | 0.218 | 0.146 |
| N-acetylisoleucine                            | 1.670  | 0.923 | 0.073 | 0.495 | 0.271  | 0.05<br>8 | 0.000 | 0.00<br>5 | 0.917 | 0.154  | 0.423 | 0.403 | 0.149 |
| N-acetylleucine                               | 1.930  | 0.914 | 0.036 | 0.470 | 0.362  | 0.06<br>4 | 0.000 | 0.00<br>0 | 0.882 | 0.128  | 0.415 | 0.506 | 0.146 |
| N-acetylphenylalanine                         | 1.440  | 0.862 | 0.096 | 0.529 | 0.248  | 0.05<br>9 | 0.025 | 0.11<br>4 | 0.951 | 0.126  | 0.396 | 0.361 | 0.139 |
| N-acetylputrescine                            | 1.320  | 0.926 | 0.157 | 0.614 | 0.255  | 0.06<br>3 | 0.002 | 0.01<br>8 | 0.849 | -0.028 | 0.438 | 0.393 | 0.154 |
| N-acetyltryptophan                            | 0.647  | 0.861 | 0.453 | 0.823 | 0.242  | 0.05<br>7 | 0.039 | 0.14<br>6 | 0.556 | 0.010  | 0.414 | 0.452 | 0.146 |
| N-acetyltyrosine                              | 1.620  | 0.929 | 0.083 | 0.523 | 0.310  | 0.06<br>3 | 0.000 | 0.00<br>6 | 0.563 | 0.095  | 0.441 | 0.521 | 0.157 |
| N-acetylvaline                                | 1.650  | 0.856 | 0.056 | 0.483 | 0.301  | 0.05<br>4 | 0.000 | 0.00<br>2 | 0.556 | 0.151  | 0.387 | 0.452 | 0.136 |
| N-palmitoyl-sphinganine (d18:0/16:0)          | 0.607  | 0.877 | 0.490 | 0.850 | 0.170  | 0.05<br>6 | 0.172 | 0.37<br>4 | 0.674 | 0.050  | 0.418 | 0.253 | 0.147 |
| N-palmitoyl-sphingosine (d18:1/16:0)          | -0.735 | 0.878 | 0.404 | 0.795 | 0.150  | 0.05<br>7 | 0.015 | 0.08<br>2 | 0.945 | 0.076  | 0.411 | 0.278 | 0.145 |
| N-stearoyl-sphinganine (d18:0/18:0)*          | -0.812 | 0.894 | 0.366 | 0.777 | 0.150  | 0.06<br>0 | 0.064 | 0.20<br>2 | 0.480 | -0.086 | 0.432 | 0.305 | 0.154 |
| N-stearoyl-sphingosine (d18:1/18:0)*          | -0.361 | 0.877 | 0.681 | 0.940 | 0.221  | 0.05<br>8 | 0.001 | 0.01<br>5 | 0.991 | -0.020 | 0.400 | 0.400 | 0.141 |
| oleoyl-arachidonoyl-glycerol (18:1/20:4) [1]* | -0.251 | 0.894 | 0.779 | 0.962 | 0.135  | 0.05<br>7 | 0.058 | 0.18<br>5 | 0.750 | -0.127 | 0.427 | 0.290 | 0.150 |
| oleoyl-arachidonoyl-glycerol (18:1/20:4) [2]* | 0.167  | 0.908 | 0.854 | 0.979 | 0.174  | 0.05<br>7 | 0.029 | 0.12<br>0 | 0.833 | -0.113 | 0.433 | 0.361 | 0.152 |
| oleoyl-linolenoyl-glycerol (18:1/18:3) [2]*   | 0.270  | 0.940 | 0.775 | 0.962 | 0.012  | 0.06<br>3 | 0.665 | 0.82<br>4 | 0.436 | 0.037  | 0.496 | 0.012 | 0.172 |
| oleoyl-linoleoyl-glycerol (18:1/18:2) [1]     | 0.020  | 0.934 | 0.983 | 0.993 | 0.114  | 0.05<br>9 | 0.196 | 0.40<br>7 | 0.556 | 0.057  | 0.449 | 0.166 | 0.158 |
| oleoyl-linoleoyl-glycerol (18:1/18:2) [2]     | 0.233  | 0.948 | 0.807 | 0.970 | 0.118  | 0.05<br>9 | 0.101 | 0.27<br>0 | 0.556 | 0.067  | 0.447 | 0.180 | 0.157 |
| oleoyl-oleoyl-glycerol (18:1/18:1) [1]*       | 0.566  | 0.793 | 0.477 | 0.839 | 0.143  | 0.05<br>1 | 0.013 | 0.07<br>6 | 0.836 | -0.001 | 0.372 | 0.241 | 0.131 |
| oleoyl-oleoyl-glycerol (18:1/18:1) [2]*       | 0.653  | 0.728 | 0.371 | 0.778 | 0.122  | 0.04<br>7 | 0.072 | 0.21<br>8 | 0.917 | -0.015 | 0.347 | 0.226 | 0.122 |

|                                                     |        |       |       |       |        |           |       |           |       |        |       |        |       |
|-----------------------------------------------------|--------|-------|-------|-------|--------|-----------|-------|-----------|-------|--------|-------|--------|-------|
| palmitoleoyl-arachidonoyl-glycerol (16:1/20:4) [2]* | -0.193 | 0.898 | 0.830 | 0.973 | -0.017 | 0.06<br>3 | 0.728 | 0.86<br>4 | 0.212 | 0.040  | 0.453 | -0.075 | 0.168 |
| palmitoleoyl-linoleoyl-glycerol (16:1/18:2) [1]*    | -0.029 | 0.920 | 0.975 | 0.993 | 0.207  | 0.05<br>9 | 0.003 | 0.02<br>8 | 0.917 | -0.026 | 0.456 | 0.373  | 0.160 |
| palmitoyl-arachidonoyl-glycerol (16:0/20:4) [1]*    | -0.221 | 1.077 | 0.838 | 0.974 | 0.192  | 0.07<br>1 | 0.114 | 0.29<br>2 | 0.975 | -0.004 | 0.533 | 0.386  | 0.180 |
| palmitoyl-arachidonoyl-glycerol (16:0/20:4) [2]*    | 0.219  | 0.926 | 0.814 | 0.970 | 0.155  | 0.05<br>8 | 0.107 | 0.28<br>0 | 0.676 | -0.083 | 0.439 | 0.302  | 0.155 |
| palmitoyl-linoleoyl-glycerol (16:0/18:2) [1]*       | 0.489  | 0.898 | 0.587 | 0.895 | 0.173  | 0.05<br>8 | 0.024 | 0.10<br>7 | 0.677 | 0.041  | 0.443 | 0.255  | 0.156 |
| palmitoyl-linoleoyl-glycerol (16:0/18:2) [2]*       | 0.612  | 0.917 | 0.505 | 0.860 | 0.153  | 0.05<br>9 | 0.040 | 0.14<br>7 | 0.556 | 0.054  | 0.441 | 0.216  | 0.155 |
| palmitoyl-oleoyl-glycerol (16:0/18:1) [1]*          | 1.600  | 0.868 | 0.068 | 0.492 | 0.273  | 0.05<br>7 | 0.000 | 0.00<br>7 | 0.917 | 0.081  | 0.428 | 0.450  | 0.150 |
| palmitoyl-oleoyl-glycerol (16:0/18:1) [2]*          | 0.952  | 0.874 | 0.278 | 0.726 | 0.191  | 0.05<br>6 | 0.021 | 0.10<br>2 | 0.869 | -0.004 | 0.412 | 0.307  | 0.145 |
| pantothenate (Vitamin B5)                           | 0.685  | 0.820 | 0.404 | 0.795 | 0.132  | 0.05<br>3 | 0.142 | 0.33<br>1 | 0.917 | 0.063  | 0.407 | 0.407  | 0.537 |
| phenylalanine                                       | 2.630  | 0.853 | 0.002 | 0.297 | 0.218  | 0.05<br>8 | 0.020 | 0.10<br>2 | 0.917 | 0.240  | 0.428 | 0.275  | 0.151 |
| proline                                             | 0.291  | 0.826 | 0.726 | 0.947 | 0.174  | 0.05<br>4 | 0.007 | 0.05<br>0 | 0.873 | 0.034  | 0.399 | 0.265  | 0.140 |
| prolyglycine                                        | -0.107 | 0.912 | 0.906 | 0.986 | 0.141  | 0.05<br>9 | 0.280 | 0.49<br>6 | 0.944 | 0.022  | 0.435 | 0.251  | 0.151 |
| prolylhydroxyproline                                | 0.733  | 0.819 | 0.373 | 0.778 | 0.205  | 0.05<br>4 | 0.000 | 0.00<br>5 | 0.674 | 0.013  | 0.413 | 0.378  | 0.145 |
| propionylcarnitine (C3)                             | 0.647  | 0.861 | 0.454 | 0.823 | 0.092  | 0.05<br>8 | 0.020 | 0.10<br>0 | 0.676 | 0.163  | 0.434 | 0.108  | 0.153 |
| pyridoxate                                          | 1.220  | 0.985 | 0.217 | 0.679 | -0.018 | 0.06<br>7 | 0.034 | 0.13<br>3 | 0.283 | 0.037  | 0.454 | -0.724 | 0.632 |
| retinol (Vitamin A)                                 | -0.192 | 0.778 | 0.806 | 0.970 | 0.265  | 0.05<br>0 | 0.000 | 0.00<br>0 | 0.154 | -0.043 | 0.394 | 1.186  | 1.046 |
| S-adenosylhomocysteine (SAH)                        | 0.599  | 1.209 | 0.621 | 0.915 | 0.270  | 0.07<br>4 | 0.088 | 0.24<br>4 | 0.080 | 0.000  | 0.005 | 0.002  | 0.322 |
| serine                                              | -0.189 | 0.868 | 0.828 | 0.973 | -0.120 | 0.05<br>8 | 0.617 | 0.78<br>9 | 0.944 | 0.028  | 0.433 | -0.208 | 0.152 |
| sphingadienine                                      | 0.812  | 0.804 | 0.314 | 0.744 | 0.049  | 0.05<br>3 | 0.753 | 0.88<br>0 | 0.525 | 0.085  | 0.384 | 0.057  | 0.135 |
| sphingomyelin (d17:2/16:0, d18:2/15:0)*             | -1.260 | 0.737 | 0.091 | 0.527 | 0.123  | 0.04<br>6 | 0.060 | 0.19<br>1 | 0.873 | -0.013 | 0.343 | 0.317  | 0.121 |
| sphingomyelin (d18:0/18:0, d19:0/17:0)*             | -1.160 | 0.840 | 0.170 | 0.629 | 0.135  | 0.05<br>6 | 0.082 | 0.23<br>8 | 0.556 | -0.104 | 0.414 | 0.307  | 0.145 |
| sphingomyelin (d18:0/20:0, d16:0/22:0)*             | -1.220 | 0.866 | 0.160 | 0.619 | 0.139  | 0.05<br>7 | 0.013 | 0.07<br>6 | 0.556 | -0.093 | 0.425 | 0.341  | 0.149 |
| sphingomyelin (d18:1/14:0, d16:1/16:0)*             | -0.882 | 0.820 | 0.284 | 0.731 | 0.187  | 0.05<br>3 | 0.000 | 0.00<br>8 | 0.663 | -0.018 | 0.385 | 0.423  | 0.136 |
| sphingomyelin (d18:1/18:1, d18:2/18:0)              | -1.310 | 0.794 | 0.101 | 0.529 | 0.115  | 0.05<br>4 | 0.317 | 0.52<br>9 | 0.975 | -0.080 | 0.397 | 0.312  | 0.140 |

|                                                     |        |       |       |       |        |           |       |           |       |        |       |        |       |
|-----------------------------------------------------|--------|-------|-------|-------|--------|-----------|-------|-----------|-------|--------|-------|--------|-------|
| sphingomyelin (d18:1/21:0, d17:1/22:0, d16:1/23:0)* | -1.070 | 0.627 | 0.090 | 0.527 | 0.075  | 0.04<br>0 | 0.066 | 0.20<br>5 | 0.884 | -0.003 | 0.316 | 0.235  | 0.111 |
| sphingomyelin (d18:2/14:0, d18:1/14:1)*             | -1.270 | 0.802 | 0.117 | 0.550 | 0.237  | 0.05<br>1 | 0.001 | 0.01<br>5 | 0.480 | -0.085 | 0.391 | 0.545  | 0.139 |
| sphingomyelin (d18:2/21:0, d16:2/23:0)*             | -0.788 | 0.685 | 0.252 | 0.705 | 0.057  | 0.04<br>4 | 0.495 | 0.70<br>0 | 0.963 | 0.075  | 0.363 | 0.170  | 0.127 |
| stearoyl-arachidonoyl-glycerol (18:0/20:4) [1]*     | -0.232 | 0.840 | 0.783 | 0.962 | 0.235  | 0.05<br>4 | 0.004 | 0.03<br>3 | 0.480 | -0.090 | 0.423 | 0.496  | 0.149 |
| stearoyl-arachidonoyl-glycerol (18:0/20:4) [2]*     | -0.396 | 0.894 | 0.658 | 0.935 | 0.184  | 0.05<br>8 | 0.059 | 0.18<br>9 | 0.833 | -0.043 | 0.432 | 0.346  | 0.151 |
| tyrosine                                            | 1.060  | 0.919 | 0.252 | 0.705 | 0.196  | 0.06<br>2 | 0.014 | 0.07<br>6 | 0.991 | 0.099  | 0.435 | 0.324  | 0.153 |
| urate                                               | 0.212  | 0.756 | 0.779 | 0.962 | 0.090  | 0.04<br>8 | 0.090 | 0.24<br>8 | 0.873 | 0.035  | 0.378 | 0.443  | 0.509 |
| valine                                              | 1.270  | 0.952 | 0.183 | 0.645 | 0.245  | 0.06<br>3 | 0.000 | 0.00<br>7 | 0.873 | 0.123  | 0.448 | 0.383  | 0.157 |
| X - 11442                                           | -0.436 | 0.925 | 0.638 | 0.922 | -0.106 | 0.06<br>0 | 0.153 | 0.34<br>7 | 0.836 | -0.017 | 0.419 | -0.151 | 0.147 |
| X - 12063                                           | 0.088  | 0.827 | 0.915 | 0.987 | 0.036  | 0.05<br>4 | 0.161 | 0.35<br>9 | 0.556 | 0.009  | 0.436 | 0.124  | 0.151 |
| X - 12170                                           | 1.410  | 0.903 | 0.120 | 0.555 | 0.301  | 0.06<br>1 | 0.042 | 0.15<br>1 | 0.512 | 0.109  | 0.433 | 0.548  | 0.634 |
| X - 12411                                           | 1.830  | 0.898 | 0.043 | 0.470 | 0.156  | 0.06<br>0 | 0.124 | 0.31<br>0 | 0.836 | 0.179  | 0.426 | 0.221  | 0.150 |
| X - 12456                                           | 1.390  | 1.098 | 0.210 | 0.672 | 0.304  | 0.07<br>1 | 0.283 | 0.49<br>7 | 0.676 | 0.135  | 0.554 | 0.548  | 0.188 |
| X - 12524                                           | 0.646  | 0.857 | 0.452 | 0.823 | 0.284  | 0.05<br>5 | 0.000 | 0.00<br>3 | 0.436 | 0.045  | 0.430 | 0.565  | 0.152 |
| X - 12680                                           | 1.990  | 0.882 | 0.026 | 0.470 | 0.277  | 0.05<br>8 | 0.121 | 0.30<br>3 | 0.556 | 0.115  | 0.443 | 0.445  | 0.156 |
| X - 12689                                           | 0.036  | 0.823 | 0.965 | 0.993 | 0.074  | 0.05<br>4 | 0.975 | 0.98<br>7 | 0.556 | 0.030  | 0.379 | 0.039  | 0.409 |
| X - 13737                                           | 1.330  | 0.833 | 0.111 | 0.548 | 0.169  | 0.05<br>7 | 0.360 | 0.57<br>4 | 0.917 | 0.103  | 0.397 | 0.209  | 0.139 |
| X - 13844                                           | 3.760  | 1.959 | 0.065 | 0.492 | 0.227  | 0.11<br>0 | 0.001 | 0.01<br>4 | 0.917 | 0.153  | 0.857 | 1.447  | 1.418 |
| X - 16946                                           | -0.732 | 0.906 | 0.420 | 0.810 | -0.093 | 0.05<br>8 | 0.308 | 0.52<br>1 | 0.663 | 0.035  | 0.423 | -0.119 | 0.148 |
| X - 17340                                           | 0.521  | 1.024 | 0.612 | 0.909 | 0.191  | 0.06<br>5 | 0.066 | 0.20<br>6 | 0.882 | 0.040  | 0.468 | 0.412  | 0.548 |
| X - 18345                                           | 3.040  | 1.364 | 0.029 | 0.470 | 0.327  | 0.09<br>4 | 0.004 | 0.03<br>5 | 0.982 | 0.342  | 0.616 | 0.427  | 0.226 |
| X - 18886                                           | 1.030  | 0.846 | 0.223 | 0.685 | 0.058  | 0.05<br>6 | 0.759 | 0.88<br>6 | 0.173 | 0.212  | 0.404 | -0.059 | 0.436 |
| X - 18922                                           | 0.687  | 0.760 | 0.368 | 0.777 | 0.078  | 0.04<br>8 | 0.924 | 0.96<br>5 | 0.873 | 0.137  | 0.407 | 0.170  | 0.143 |
| X - 21829                                           | 0.812  | 0.857 | 0.345 | 0.777 | 0.143  | 0.05<br>4 | 0.117 | 0.29<br>7 | 0.769 | 0.106  | 0.414 | 0.227  | 0.147 |

|           |        |       |       |       |        |           |       |           |       |        |       |        |       |
|-----------|--------|-------|-------|-------|--------|-----------|-------|-----------|-------|--------|-------|--------|-------|
| X - 22775 | 2.060  | 0.905 | 0.025 | 0.470 | 0.229  | 0.06<br>5 | 0.005 | 0.03<br>8 | 0.991 | 0.122  | 0.443 | 0.674  | 0.715 |
| X - 23294 | 0.264  | 1.303 | 0.840 | 0.975 | -0.016 | 0.08<br>7 | 0.225 | 0.44<br>2 | 0.394 | -0.115 | 0.665 | 0.649  | 0.867 |
| X - 23590 | 1.010  | 0.921 | 0.276 | 0.726 | 0.186  | 0.06<br>1 | 0.053 | 0.17<br>6 | 0.663 | 0.135  | 0.417 | 0.370  | 0.546 |
| X - 23593 | 1.390  | 0.909 | 0.128 | 0.570 | 0.207  | 0.06<br>1 | 0.023 | 0.10<br>6 | 0.917 | 0.050  | 0.439 | 0.541  | 0.593 |
| X - 23680 | -0.256 | 0.728 | 0.725 | 0.947 | 0.009  | 0.04<br>9 | 0.311 | 0.52<br>3 | 0.512 | 0.061  | 0.378 | 0.388  | 0.514 |
| X - 24106 | -0.284 | 0.812 | 0.727 | 0.947 | 0.010  | 0.05<br>3 | 0.871 | 0.94<br>6 | 0.352 | -0.011 | 0.407 | -0.014 | 0.440 |
| X - 24328 | 1.660  | 0.730 | 0.025 | 0.470 | 0.039  | 0.04<br>8 | 0.274 | 0.49<br>2 | 0.273 | 0.103  | 0.346 | -0.474 | 0.486 |
| X - 24588 | 0.574  | 0.872 | 0.512 | 0.860 | 0.223  | 0.05<br>7 | 0.020 | 0.10<br>0 | 0.907 | -0.047 | 0.401 | 0.581  | 0.615 |
| X - 24728 | 1.840  | 0.792 | 0.022 | 0.470 | 0.246  | 0.05<br>4 | 0.005 | 0.04<br>1 | 0.850 | 0.127  | 0.388 | 0.632  | 0.626 |
| X - 25371 | 0.700  | 0.909 | 0.443 | 0.823 | 0.149  | 0.06<br>2 | 0.830 | 0.92<br>1 | 0.880 | 0.086  | 0.435 | -0.010 | 0.467 |

**Supplementary Table 7. Multivariable analyses of the associations between metabolic biomarkers with risk of NAFLD**

| Biomarkers                                       | Super-pathway                     | Sub-pathway                               | Univariable       | Multivariable     |
|--------------------------------------------------|-----------------------------------|-------------------------------------------|-------------------|-------------------|
|                                                  |                                   |                                           | HR (95% CI)       | HR (95% CI)       |
| glutamate                                        | Amino Acid                        | Glutamate Metabolism                      | 0.85 (0.74, 0.99) | 0.88 (0.71, 1.08) |
| cysteine-glutathione disulfide                   | Amino Acid                        | Glutathione Metabolism                    | 1.27 (1.74, 1.46) | 1.30 (1.09, 1.56) |
| isovalerylglycine                                | Amino Acid                        | Leucine, Isoleucine and Valine Metabolism | 1.08 (1.74, 1.19) | 1.15 (0.97, 1.37) |
| alpha-tocopherol                                 | Cofactors and Vitamins            | Tocopherol Metabolism                     | 1.31 (1.74, 1.55) | 1.09 (0.89, 1.35) |
| deoxycarnitine                                   | Lipid                             | Carnitine Metabolism                      | 1.43 (1.74, 1.71) | 1.08 (0.85, 1.37) |
| 3-hydroxysebacate                                | Lipid                             | Fatty Acid, Monohydroxy                   | 0.74 (0.74, 0.88) | 0.77 (0.60, 0.99) |
| phosphocholine                                   | Lipid                             | Phospholipid Metabolism                   | 0.78 (0.74, 0.93) | 0.81 (0.65, 1.00) |
| 3b-hydroxy-5-choleonic acid                      | Lipid                             | Secondary Bile Acid Metabolism            | 0.72 (1.74, 0.83) | 1.02 (0.81, 1.28) |
| glucuronide of C10H18O2 (7)*                     | Partially Characterized Molecules | Partially Characterized Molecules         | 0.81 (1.74, 0.95) | 1.01 (0.84, 1.20) |
| 1H-indole-7-acetic acid                          | Xenobiotics                       | Bacterial/Fungal                          | 1.32 (1.74, 1.57) | 1.08 (0.86, 1.36) |
| indolin-2-one                                    | Xenobiotics                       | Food Component/Plant                      | 0.74 (0.74, 0.86) | 0.91 (0.69, 1.20) |
| saccharin                                        | Xenobiotics                       | Food Component/Plant                      | 1.46 (1.74, 1.72) | 1.10 (0.85, 1.42) |
| X - 13729                                        | Unknown                           |                                           | 0.77 (0.74, 0.92) | 0.94 (0.76, 1.16) |
| X - 17676                                        | Unknown                           |                                           | 0.88 (1.74, 0.99) | 1.02 (0.84, 1.23) |
| X - 21785                                        | Unknown                           |                                           | 0.85 (0.74, 1.00) | 0.86 (0.72, 1.03) |
| malate                                           | Energy                            | TCA Cycle                                 | 0.92 (0.74, 1.07) | 0.87 (0.72, 1.03) |
| behenoyl dihydrosphingomyelin (d18:0/22:0)*      | Lipid                             | Dihydrosphingomyelins                     | 1.55 (1.74, 1.82) | 1.51 (1.15, 1.98) |
| 1-myristoyl-2-palmitoyl-GPC (14:0/16:0)          | Lipid                             | Phosphatidylcholine (PC)                  | 1.28 (1.74, 1.50) | 1.21 (0.98, 1.49) |
| phosphoethanolamine (PE)                         | Lipid                             | Phospholipid Metabolism                   | 1.45 (1.74, 1.70) | 1.09 (0.90, 1.33) |
| X - 12216                                        | Lipid                             | Sphingomyelins                            | 0.78 (1.74, 0.90) | 1.22 (0.93, 1.60) |
| X - 21286                                        | Unknown                           |                                           | 0.77 (0.74, 0.90) | 0.77 (0.55, 1.08) |
| carnitine                                        | Lipid                             | Carnitine Metabolism                      | 1.11 (1.74, 1.32) | 1.03 (0.85, 1.24) |
| 2-hydroxyoctanoate                               | Lipid                             | Fatty Acid, Monohydroxy                   | 0.66 (0.74, 0.79) | 0.86 (0.69, 1.08) |
| 1-palmitoyl-2-oleoyl-GPI (16:0/18:1)*            | Lipid                             | Phosphatidylinositol (PI)                 | 1.27 (1.74, 1.50) | 1.29 (1.00, 1.67) |
| 1-(1-enyl-palmitoyl)-2-oleoyl-GPC (P-16:0/18:1)* | Lipid                             | Plasmalogen                               | 1.47 (1.74, 1.77) | 1.03 (0.78, 1.35) |
| 6-hydroxyindole sulfate                          | Xenobiotics                       | Chemical                                  | 0.80 (1.74, 0.94) | 1.19 (0.85, 1.65) |
| X - 18913                                        | Unknown                           |                                           | 1.26 (1.74, 1.51) | 1.21 (0.93, 1.57) |
| X - 24951                                        | Unknown                           |                                           | 1.10 (0.74, 1.31) | 0.87 (0.65, 1.15) |

The univariable estimates were adjusted for age, age squared, sex, area, smoking, education, and fasting time.  
The multivariable estimates were additionally adjusted for other metabolic biomarkers.

**Supplementary Table 8. Previous studies on metabolic biomarkers with NAFLD**

| Ascertainment                       | Reference                                       | Participants                                                                                                      | Classes/pathways                                                                 | Traits                                                                                                                                                                   |
|-------------------------------------|-------------------------------------------------|-------------------------------------------------------------------------------------------------------------------|----------------------------------------------------------------------------------|--------------------------------------------------------------------------------------------------------------------------------------------------------------------------|
| Liver biopsy                        | Gaggini/2018/Italy <sup>1</sup>                 | NAFLD (n=44), healthy controls (n=20)                                                                             | Animo acids                                                                      | ↑: <b>alanine, glutamate, isoleucine, valine, tyrosine</b> , the GSG-index                                                                                               |
|                                     | Lake/2015/US <sup>1</sup>                       | normal (n=19), steatosis (n=10), NASH (n=9), NASH not fatty liver (n=7)                                           | Lipids                                                                           | ↓: lysoPC C16:0, SM C16:0, PCae C32:1                                                                                                                                    |
|                                     |                                                 |                                                                                                                   | BCAAs                                                                            | ↑: <b>leucine, isoleucine, valine</b>                                                                                                                                    |
|                                     | Oresic/2013/Finland <sup>1</sup>                | NAFLD (n=306), healthy controls (n=373)                                                                           | Carnitines                                                                       | ↑: <b>propionyl, hexanoyl, lauryl, acetyl, butyryl carnitine</b>                                                                                                         |
|                                     | Tokushige/2013/Japan <sup>1</sup>               | initial cohort: NAFLD (n=44); validation cohort: NAFLD (n=105), primary biliary cirrhosis (n=26), controls (n=48) | Lipids                                                                           | ↑: triacylglycerols with low carbon number and double-bond content                                                                                                       |
|                                     |                                                 |                                                                                                                   | Sex hormone                                                                      | ↓: lysoPC C16:0, C18:0, PC aa C34:2, C40:7, SM C36:0, 42:2, 34:1<br>↑: 16-OH-DHEA-S, 16-OH-DHEA-S/DHEA-S, 16-OH-DHEA-S/etiocholanolone-S<br>↓: DHEA-S, etiocholanolone-S |
| Kalhan/2011/US <sup>1</sup>         | NAFLD/NASH (n=24), healthy controls (n=25)      | Carnitines                                                                                                        | ↑: free carnitine, <b>butyrylcarnitine, methylbutyrylcarnitine</b>               |                                                                                                                                                                          |
|                                     |                                                 | BCAAs & dipeptides                                                                                                | ↑: <b>glutamyl dipeptides, branched-chain amino acids</b>                        |                                                                                                                                                                          |
| Soga/2011/Japan <sup>1</sup>        | 248 cases and controls including 11 NAFLD cases | Others                                                                                                            | ↓: <b>cysteine-glutathione</b> , long-chain fatty acids                          |                                                                                                                                                                          |
|                                     |                                                 | A biomarker panel                                                                                                 | ↑: <b>gamma-glutamyl dipeptides</b> , transaminases, <b>methionine sulfoxide</b> |                                                                                                                                                                          |
| Ultrasound                          | Feldman/2018/Austria <sup>1</sup>               | lean healthy (n=69), obese healthy (n=50), obese NAFLD (n=62)                                                     | Animo acids                                                                      | ↑: <b>alanine, leucine, isoleucine, valine</b><br>↓: <b>glycine</b>                                                                                                      |
|                                     | Pirola/2018/UK <sup>2</sup>                     | 3048 participants of age 17 (70 NAFLD cases)                                                                      | Lipids                                                                           | ↑: all XL- to S-VLDL, most cholesterol                                                                                                                                   |
|                                     |                                                 |                                                                                                                   | Inflammation                                                                     | ↑: glycoprotein acetyls                                                                                                                                                  |
|                                     | Kaikkonen/2017/Finland <sup>3</sup>             | 5086 participants                                                                                                 | Lipids                                                                           | ↑: VLDL, IDL, LDL, small HDL, VLDL size, ApoB, <b>glycerol</b><br>↓: large HDL, LDL size, HDL size                                                                       |
|                                     |                                                 |                                                                                                                   | Fatty acids                                                                      | ↑: total FA, MUFA%, SFA%<br>↓: PUFA%, n-3%, DHA%, n-6%, linoleic acid%, n-6/n-3, PUFA/SFA                                                                                |
|                                     |                                                 |                                                                                                                   | Animo acids                                                                      | ↑: <b>isoleucine, leucine, valine, phenylalanine, tyrosin, alanine</b>                                                                                                   |
| Glycolysis                          |                                                 |                                                                                                                   | ↑: <b>pyruvate</b>                                                               |                                                                                                                                                                          |
| Others                              | ↑: glycoprotein acetyls, CRP, GGT, ALT          |                                                                                                                   |                                                                                  |                                                                                                                                                                          |
| MRI                                 | Koch/2017/Germany <sup>2</sup>                  | 555 participants (219 NAFLD cases)                                                                                | Glutathione                                                                      | ↓: <b>cysteine-glutathione disulfide</b>                                                                                                                                 |
|                                     |                                                 |                                                                                                                   | Glutamate                                                                        | ↑: <b>glutamate</b>                                                                                                                                                      |
|                                     |                                                 |                                                                                                                   | BCAAs                                                                            | ↑: <b>isoleucine, valine, leucine</b> , 3-methyl-2-oxovalerate                                                                                                           |
|                                     |                                                 |                                                                                                                   | Glutamyl dipeptides                                                              | ↑: <b>γ-glutamylvaline, γ-glutamylisoleucine, γ-glutamylleucine</b>                                                                                                      |
|                                     | Others                                          | ↑: <b>propionylcarnitine, tyrosine, urate, cicol(leucylprolyl)</b>                                                |                                                                                  |                                                                                                                                                                          |
| Boone/2019/Netherlands <sup>2</sup> | 149 participants                                | Lipids                                                                                                            | ↑: lysoPC C14:0, PC aa C32:1, PC aa C36:1, PC aa C40:5                           |                                                                                                                                                                          |

<sup>1</sup> Case-control, <sup>2</sup> cross-sectional, <sup>3</sup> prospective.



**Supplementary Table 9. Previous prospective studies on metabolic risk factors with NAFLD**

| <b>Study</b>                      | <b>Description</b>                | <b>Ascertainment</b>    | <b>HR</b>         |
|-----------------------------------|-----------------------------------|-------------------------|-------------------|
| <b>BMI per 1 kg/m<sup>2</sup></b> |                                   |                         |                   |
| 2016 Li                           | Meta-analysis of 21 studies       | 20 ultrasound, 1 biopsy | 1.20 (1.14, 1.26) |
| 2013 Musso                        | Included in 2016 Li et al.        | Biopsy                  | 1.32 (1.02, 2.13) |
| 2019 Pang                         |                                   | Hospital record         | 1.23 (1.21, 1.25) |
| <b>Diabetes (yes vs no)</b>       |                                   |                         |                   |
| 2018 Mantovani                    | Meta-analysis of 16 studies       | 14 ultrasound, 2 CT     | 2.22 (1.84, 2.60) |
| 2018 Ma                           | Included in 2018 Mantovani et al. | CT                      | 2.66 (1.20, 5.70) |
| 2015 Shah                         | Included in 2018 Mantovani et al. | CT                      | 2.06 (1.50, 2.80) |
| 2019 Pang                         |                                   | Hospital record         | 1.76 (1.47, 2.16) |
